# Supplementary material for: Transition-metal-catalyzed straightforward synthesis of N-trifluoromethyl indoles from 2-alkynylaryl isothiocyanates or 2-alkynylanilines
Source: Royal Society of Chemistry journal article supplement (doi:10.1039/d3qo02007j), 2024-01-01
Supplement: d3qo02007j1.pdf [file d3qo02007j1.pdf]

## Supporting Information

### **Transition-metal-catalyzed straightforward synthesis of *N*-trifluoromethyl indoles from 2-alkynylaryl isothiocyanates or 2-alkynylanilines†**

Jianquan Hong,<sup>\*a</sup> Chongbin Wei,<sup>a</sup> Ruilong Feng,<sup>a</sup> Kui Zhao,<sup>a</sup> Yi Zhu,<sup>a</sup> Chunxiang Li,<sup>a</sup> Xifei Chen,<sup>a</sup> Xinxin Gong,<sup>a</sup> Dejing Yin,<sup>b</sup> Changge Zheng<sup>\*a</sup>

<sup>a</sup>Key Laboratory of Synthetic and Biological Colloids, Ministry of Education, School of Chemical and Material Engineering, Jiangnan University, Wuxi, Jiangsu 214122, P. R. China

<sup>b</sup>School of Biotechnology, Jiangnan University, Wuxi, Jiangsu 214122, P. R. China

## Table of Contents

|                                                                                                 |      |
|-------------------------------------------------------------------------------------------------|------|
| 1. General Information.....                                                                     | S3   |
| 2. General procedure for synthesis of <i>N</i> -trifluoromethyl indoles .....                   | S3   |
| 3. Modification of complex natural product and pharmaceutical molecules.....                    | S6   |
| 4. Synthesis of compounds 3bk and 3bp on 5.0 mmol scale .....                                   | S7   |
| 5. Test on desulfurization-fluorination/cyclization of some alkynyl arylamines .....            | S7   |
| 6. Identification of byproduct in the synthesis of <i>N</i> -trifluoromethyl indole 3aa .....   | S11  |
| 7. Characterization data for the products .....                                                 | S11  |
| 8. Mechanism study .....                                                                        | S28  |
| 9. <sup>1</sup> H NMR, <sup>13</sup> C NMR and <sup>19</sup> F NMR spectra of the products..... | S30  |
| 10. HRMS analysis reports for the new compounds.....                                            | S104 |
| 11. Crystal data and structure refinement for the products.....                                 | S146 |
| 12. Checkcif report for the products .....                                                      | S149 |
| 13. References.....                                                                             | S154 |

## 1. General Information

Unless otherwise noted, all commercially available materials were purchased from Energy Chemical and used without further purification. Column chromatography was carried out on silica gel 60 (200–300 mesh). Thin-layer chromatography (TLC) was performed using 60 mesh silica gel plates and visualized with short-wavelength UV light (254 nm).  $^1\text{H}$  NMR,  $^{13}\text{C}$  NMR,  $^{19}\text{F}$  NMR were all recorded using  $\text{CDCl}_3$  as a solvent on a Bruker 400 MHz spectrometer at 298 K (400 MHz for  $^1\text{H}$ , 100 MHz for  $^{13}\text{C}$ , and 376 MHz for  $^{19}\text{F}$ ). Chemical shifts ( $\delta$ ) were measured in ppm relative to TMS  $\delta = 0$  for  $^1\text{H}$  or to chloroform  $\delta = 77.0$  for  $^{13}\text{C}$  as an internal standard. Data are reported as follows: chemical shift, multiplicity (s = singlet, d = doublet, t = triplet, q = quartet, dd = doublet of doublets, dq = doublet of quartets, m = multiplet). Coupling constant  $J$  was reported in hertz (Hz).

## 2. General procedure for synthesis of *N*-trifluoromethyl indoles

### Method A

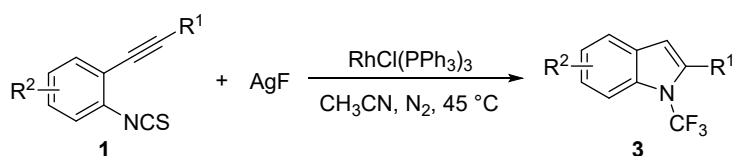

To an oven-dried 25 mL Schlenk tube equipped with a stir bar were added 2-alkynyl aryl isothiocyanate (0.5 mmol, 1.0 equiv.),  $\text{AgF}$  (3.2 equiv.),  $\text{RhCl}(\text{PPh}_3)_3$  (1 mol%). The Schlenk tube was evacuated and refilled with  $\text{N}_2$  (three times).  $\text{CH}_3\text{CN}$  (5 mL) was then added by syringe. The reaction mixture was required to heat to  $45\text{ }^\circ\text{C}$  and then stirred for 3 h under  $\text{N}_2$ . After cooling to room temperature, the reaction mixture was diluted with ethyl acetate, filtered through a plug of celite and wash with ethyl acetate, then concentrated under vacuum and purified by silica gel flash column chromatography (200-300 mesh) using petroleum ether ( $60\text{-}90\text{ }^\circ\text{C}$ ) as eluent.

**Table S1.** Optimization of the reaction conditions<sup>a</sup>

| Entry | Catalyst | Base | Solvent                  | Temp/ $^\circ\text{C}$ | Yield/% <sup>b</sup> |
|-------|----------|------|--------------------------|------------------------|----------------------|
| 1     | -        | -    | $\text{CH}_3\text{CN}$   | 45                     | 63                   |
| 2     | -        | -    | $\text{CH}_3\text{OH}$   | 45                     | 0                    |
| 3     | -        | -    | DMSO                     | 45                     | 20                   |
| 4     | -        | -    | DMF                      | 45                     | 45                   |
| 5     | -        | -    | Dioxane                  | 45                     | 0                    |
| 6     | -        | -    | $\text{CH}_2\text{Cl}_2$ | 45                     | 0                    |
| 7     | -        | -    | THF                      | 45                     | 0                    |
| 8     | -        | -    | NMP                      | 45                     | 20                   |
| 9     | -        | -    | Cyclohexane              | 45                     | 0                    |
| 10    | -        | -    | Toluene                  | 45                     | 0                    |

|                   |                                                    |                                 |                    |    |    |
|-------------------|----------------------------------------------------|---------------------------------|--------------------|----|----|
| 11                | -                                                  | -                               | CHCl <sub>3</sub>  | 45 | 0  |
| 12                | -                                                  | -                               | Pyridine           | 45 | 0  |
| 13                | -                                                  | Na <sub>2</sub> CO <sub>3</sub> | CH <sub>3</sub> CN | 45 | 40 |
| 14                | -                                                  | NaOAc                           | CH <sub>3</sub> CN | 45 | 0  |
| 15                | -                                                  | NEt <sub>3</sub>                | CH <sub>3</sub> CN | 45 | 45 |
| 16                | -                                                  | NaHSO <sub>3</sub>              | CH <sub>3</sub> CN | 45 | 20 |
| 17                | -                                                  | KH <sub>2</sub> PO <sub>4</sub> | CH <sub>3</sub> CN | 45 | 0  |
| 18                | ZnCl <sub>2</sub>                                  | -                               | CH <sub>3</sub> CN | 45 | 50 |
| 19                | Cu(OAc) <sub>2</sub>                               | -                               | CH <sub>3</sub> CN | 45 | 30 |
| 20                | CuI                                                | -                               | CH <sub>3</sub> CN | 45 | 56 |
| 21                | (PPh <sub>3</sub> ) <sub>3</sub> RhCl              | -                               | CH <sub>3</sub> CN | 45 | 89 |
| 22                | (PPh <sub>3</sub> ) <sub>2</sub> NiCl <sub>2</sub> | -                               | CH <sub>3</sub> CN | 45 | 20 |
| 23                | (PPh <sub>3</sub> ) <sub>2</sub> PdCl <sub>2</sub> | -                               | CH <sub>3</sub> CN | 45 | 23 |
| 24                | Ru(II)Cl <sub>2</sub>                              | -                               | CH <sub>3</sub> CN | 45 | 10 |
| 25                | Co(OAc) <sub>2</sub>                               | -                               | CH <sub>3</sub> CN | 45 | 0  |
| 26                | Fe(OAc) <sub>2</sub>                               | -                               | CH <sub>3</sub> CN | 45 | 15 |
| 27                | FeCl <sub>3</sub>                                  | -                               | CH <sub>3</sub> CN | 45 | 10 |
| 28                | AlCl <sub>3</sub>                                  | -                               | CH <sub>3</sub> CN | 45 | 5  |
| 29 <sup>c</sup>   | (PPh <sub>3</sub> ) <sub>3</sub> RhCl              | -                               | CH <sub>3</sub> CN | 45 | 90 |
| 30 <sup>c,d</sup> | (PPh <sub>3</sub> ) <sub>3</sub> RhCl              | -                               | CH <sub>3</sub> CN | 45 | 83 |
| 31 <sup>c</sup>   | (PPh <sub>3</sub> ) <sub>3</sub> RhCl              | -                               | CH <sub>3</sub> CN | rt | 80 |
| 32 <sup>c</sup>   | (PPh <sub>3</sub> ) <sub>3</sub> RhCl              | -                               | CH <sub>3</sub> CN | 35 | 80 |
| 33 <sup>c</sup>   | (PPh <sub>3</sub> ) <sub>3</sub> RhCl              | -                               | CH <sub>3</sub> CN | 65 | 85 |
| 34 <sup>c</sup>   | (PPh <sub>3</sub> ) <sub>3</sub> RhCl              | -                               | CH <sub>3</sub> CN | 80 | 85 |
| 35 <sup>c,e</sup> | (PPh <sub>3</sub> ) <sub>3</sub> RhCl              | -                               | CH <sub>3</sub> CN | 45 | 36 |

<sup>a</sup>Reaction conditions: under N<sub>2</sub>, (2-phenylethynyl)phenyl isothiocyanate (0.1 mmol, 1.0 equiv), AgF (0.32 mmol, 3.2 equiv), catalyst (0.01 mmol, 10 mol%) and base (0.20 mmol, 2.0 equiv), solvent (1.5 mL), N<sub>2</sub>, Temp., 3 h. <sup>b</sup>Reaction yield determined by <sup>19</sup>F NMR spectroscopy using 4,4-Difluorobiphenyl as internal standard based on (2-phenylethynyl)phenyl isothiocyanate. <sup>c</sup>Catalyst (0.001 mmol, 1 mol%). <sup>d</sup>AgF (0.5 mmol, 5.0 equiv). <sup>e</sup>Under air.

## Method B

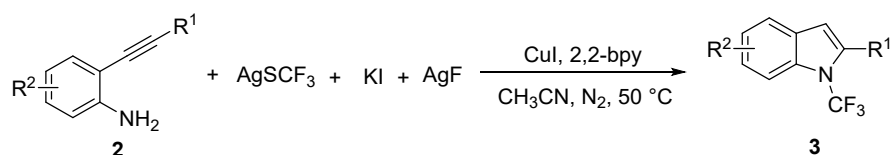

To an oven-dried 25 mL Schlenk tube equipped with a stir bar were added 2-alkynyl arylamine (0.5 mmol, 1.0 equiv.), AgSCF<sub>3</sub> (1.5 equiv.), KI (1.5 equiv.), AgF (5.0 equiv.), CuI (20 mol%) and 2,2'-Bipyridine (20 mol%). The Schlenk tube was evacuated and refilled with N<sub>2</sub> (three times). CH<sub>3</sub>CN (5 mL) was then added by syringe. The reaction mixture was required to heat to 50 °C and then stirred for 4 h under N<sub>2</sub>. After cooling to room temperature, the reaction mixture was diluted with ethyl acetate, filtered through a plug of celite and wash with ethyl acetate, then concentrated under



vacuum and purified by silica gel flash column chromatography (200-300 mesh) using petroleum ether (60-90 °C) as eluent.

**Table S2.** Optimization of the reaction conditions<sup>a</sup>

| Entry          | Catalyst                          | Ligand                  | Solvent                 | Temp./°C  | Yield/% <sup>b</sup> |
|----------------|-----------------------------------|-------------------------|-------------------------|-----------|----------------------|
| 1              | -                                 | -                       | CH <sub>3</sub> CN      | 25        | 58                   |
| 2              | -                                 | -                       | THF                     | 25        | 0                    |
| 3              | -                                 | -                       | DMF                     | 25        | Trace                |
| 4              | -                                 | -                       | DMSO                    | 25        | 0                    |
| 5              | -                                 | -                       | DCE                     | 25        | 0                    |
| 6              | -                                 | -                       | DME                     | 25        | 0                    |
| 7 <sup>c</sup> | -                                 | -                       | CH <sub>3</sub> CN      | 25        | 0                    |
| 8 <sup>d</sup> | -                                 | -                       | CH <sub>3</sub> CN      | 25        | 0                    |
| 9              | -                                 | RuCl <sub>2</sub>       | CH <sub>3</sub> CN      | 25        | 52                   |
| 10             | -                                 | RhCl(PPh <sub>3</sub> ) | CH <sub>3</sub> CN      | 25        | 37                   |
| 11             | -                                 | Pd(OAc) <sub>2</sub>    | CH <sub>3</sub> CN      | 25        | 46                   |
| 12             | -                                 | CuI                     | CH <sub>3</sub> CN      | 25        | 66                   |
| 13             | -                                 | CuCl                    | CH <sub>3</sub> CN      | 25        | 22                   |
| 14             | -                                 | CuBr                    | CH <sub>3</sub> CN      | 25        | 28                   |
| 15             | -                                 | CuOAc                   | CH <sub>3</sub> CN      | 25        | Trace                |
| 16             | -                                 | Cu(OAc) <sub>2</sub>    | CH <sub>3</sub> CN      | 25        | Trace                |
| 17             | -                                 | CuCl <sub>2</sub>       | CH <sub>3</sub> CN      | 25        | Trace                |
| 18             | -                                 | CuF <sub>2</sub>        | CH <sub>3</sub> CN      | 25        | 46                   |
| 19             | -                                 | Cu(TFA) <sub>2</sub>    | CH <sub>3</sub> CN      | 25        | 17                   |
| 20             | 1,10-Phen                         | CuI                     | CH <sub>3</sub> CN      | 25        | 36                   |
| 21             | 2,2'-Bipyridine                   | CuI                     | CH <sub>3</sub> CN      | 25        | 76                   |
| 22             | PPh <sub>3</sub>                  | CuI                     | CH <sub>3</sub> CN      | 25        | 48                   |
| 23             | Tricyclohexyl Phosphine           | CuI                     | CH <sub>3</sub> CN      | 25        | 44                   |
| 24             | DPEPhos                           | CuI                     | CH <sub>3</sub> CN      | 25        | 46                   |
| 25             | 4,4'-Bipyridine                   | CuI                     | CH <sub>3</sub> CN      | 25        | 12                   |
| 26             | 4,4'-Di-Tert-Butyl-2,2'-Dipyridyl | CuI                     | CH <sub>3</sub> CN      | 25        | 22                   |
| 27             | 2,2':6',2''-Terpyridine           | CuI                     | CH <sub>3</sub> CN      | 25        | 16                   |
| 28             | 5,5'-Dimethyl-2,2'-Dipyridyl      | CuI                     | CH <sub>3</sub> CN      | 25        | 38                   |
| 29             | 2,2'-Bipyridine                   | CuI                     | CH <sub>3</sub> CN      | 30        | 64                   |
| <b>30</b>      | <b>2,2'-Bipyridine</b>            | CuI                     | <b>CH<sub>3</sub>CN</b> | <b>50</b> | <b>88</b>            |
| 31             | 2,2'-Bipyridine                   | CuI                     | CH <sub>3</sub> CN      | 70        | 83                   |
| 32             | 2,2'-Bipyridine                   | CuI                     | CH <sub>3</sub> CN      | 50        | Trace                |

<sup>a</sup>Reaction conditions: 2-phenylethynyl aniline (0.10 mmol, 1.0 equiv), AgSCF<sub>3</sub> (0.15 mmol, 1.5 equiv), KI (0.15 mmol, 1.5 equiv), AgF (0.5 mmol, 5 equiv), catalyst (0.02 mmol, 20 mol%), ligand (0.02 mmol, 20 mol%), solvent (2 mL), N<sub>2</sub>, Temp., 4 h. <sup>b</sup>Reaction yield determined by <sup>19</sup>F NMR spectroscopy using 4,4'-difluorobiphenyl as internal standard based on 2-phenylethynyl aniline. <sup>c</sup>KBr instead of KI. <sup>d</sup>KCl instead of KI. <sup>e</sup>Under air.

## Method C

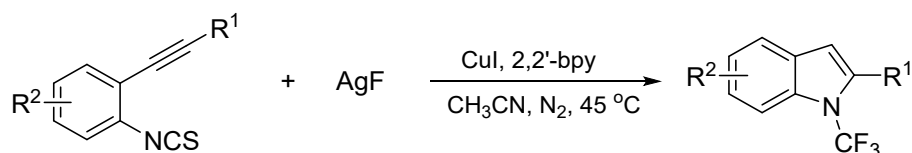

To an oven-dried 10 mL Schlenk tube equipped with a stir bar were added 2-alkynyl aryl isothiocyanate (0.5 mmol, 1.0 equiv.), AgF (3.2 equiv.), CuI (1 mol%) and 2,2'-bipyridine (1 mol%). The Schlenk tube was evacuated and refilled with N<sub>2</sub> (three times). CH<sub>3</sub>CN (1.5 mL) was then added by syringe. The reaction mixture was required to heat to 45 °C and then stirred for 6 h under N<sub>2</sub>. After cooling to room temperature, the reaction mixture was diluted with ethyl acetate, filtered through a plug of celite and wash with ethyl acetate, then concentrated under vacuum and purified by silica gel flash column chromatography (200-300 mesh) using petroleum ether (60-90 °C) as eluent.

### 3. Modification of complex natural product and pharmaceutical molecules

(1) 2-Alkynyl aryl isothiocyanates **1ay** and **1bn** corresponding to products **3ay** and **3bn** were prepared according to the literature procedures.<sup>1-4</sup> 2-Alkynyl arylamines **2ag'** and **2bp** corresponding to products **3ag'** and **3bp** were prepared according to the literature procedures.<sup>5-7</sup>

(2) Target products were prepared according to the general procedure.

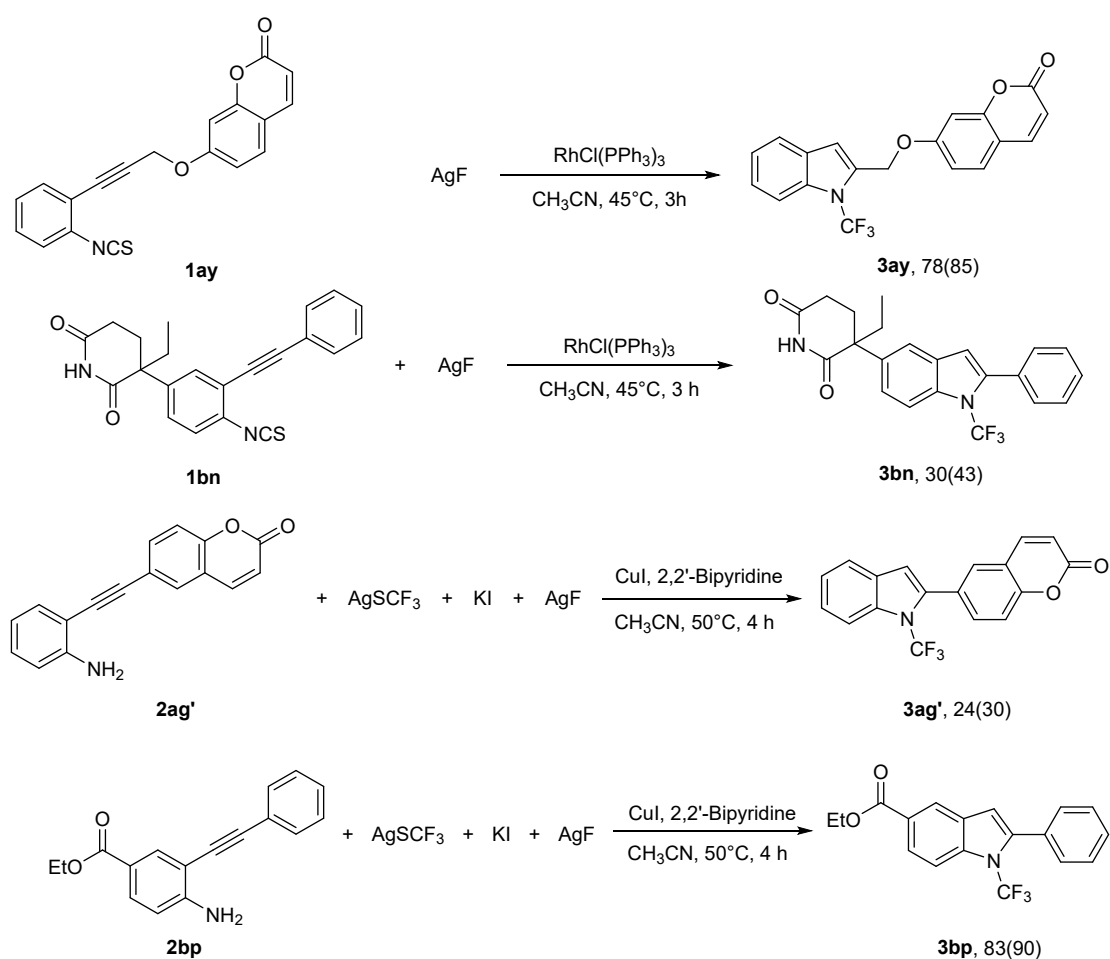

#### 4. Synthesis of compounds **3bk** and **3bp** on 5.0 mmol scale

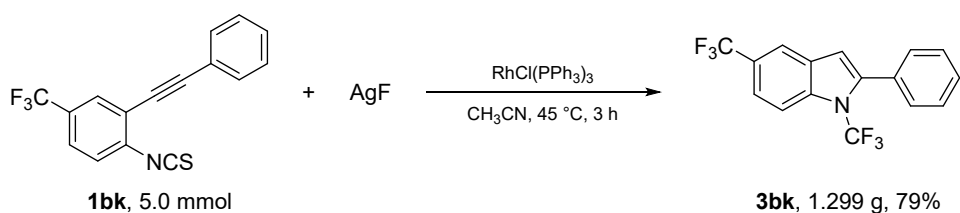

To an oven-dried 50 mL Schlenk tube equipped with a stir bar were added 1-isothiocyanato-2-(phenylethynyl)-4-(trifluoromethyl)benzene **1bk** (5.00 mmol, 1.520 g, 1.0 equiv.), AgF (16.00 mmol, 2.020 g, 3.2 equiv) and RhCl(PPh<sub>3</sub>)<sub>3</sub> (0.05 mmol, 0.046 mg, 1 mol%). The Schlenk tube was evacuated and refilled with N<sub>2</sub> (three times). CH<sub>3</sub>CN (25 mL) was then added by syringe. The reaction mixture was required to heat to 45 °C and then stirred for 3 h under N<sub>2</sub>. After cooling to room temperature, the reaction mixture was diluted with ethyl acetate, filtered through a plug of celite and was with ethyl acetate, then concentrated under vacuum and purified by silica gel flash column chromatography (200-300 mesh) using petroleum ether (60-90 °C) as eluent. to afford *N*-trifluoromethyl indole **3bk** (1.299 g, 79%).

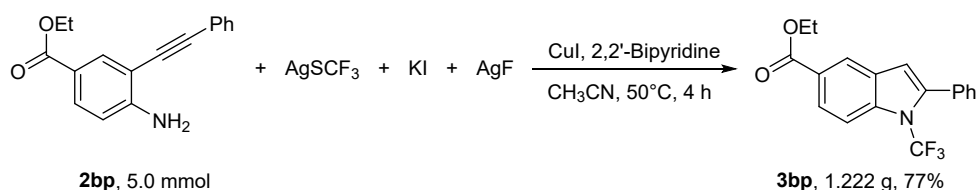

To an oven-dried 50 ml Schlenk tube equipped with a stir bar were added ethyl 4-amino-3-(phenylethynyl)benzoate **2bp** (5.00 mmol, 1.326 g, 1.0 equiv.), KI (7.5 mmol 1.245 g, 1.5 equiv.), AgSCF<sub>3</sub> (7.5 mmol, 1.567 g, 1.5 equiv.), AgF (25 mmol, 3.171 g, 5 equiv.), CuI (1 mmol, 0.190 g, 20 mmol%) and 2,2'-Bipyridine (1 mmol, 0.156 g, 20 mol%). The Schlenk tube was evacuated and refilled with N<sub>2</sub> (three times). CH<sub>3</sub>CN (30 ml) was then added by syringe. After cooling to room temperature, the reaction mixture was diluted with ethyl acetate, filtered through a plug of celite and was with ethyl acetate, then concentrated under vacuum and purified by silica gel flash column chromatography (200-300 mesh) using petroleum ether (60-90 °C) as eluent to afford *N*-trifluoromethyl indole **3bp** (1.222g, 77%).

#### 5. Test on desulfurization-fluorination/cyclization of some alkynyl arylamines

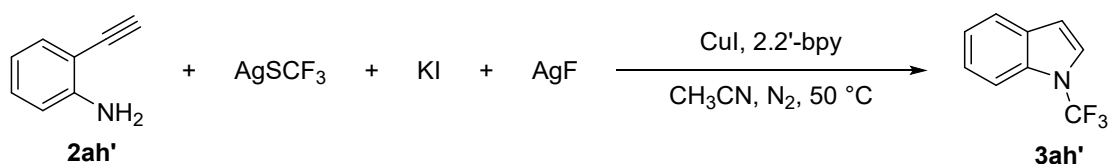

To an oven-dried 10 ml Schlenk tube equipped with a stir bar were added KI (0.15 mmol 24.9 mg, 1.5 equiv.), AgSCF<sub>3</sub> (0.15 mmol, 31.33 mg, 1.5 equiv.), AgF (0.5 mmol,

63.4 mg, 5 equiv.), CuI (0.02mmol, 3.82 mg, 20 mmol%) and 2,2'-Bipyridine (0.02mmol, 3.12 mg, 20 mol%). The Schlenk tube was evacuated and refilled with N<sub>2</sub> (three times). CH<sub>3</sub>CN (30 ml) and methyl 3-(2-aminophenyl)propiolate **2ah'** (0.1 mmol, 11.71 mg, 1.0 equiv.) was then added by syringe. The reaction mixture was required to heat to 50 °C and then stirred for 4 h. After cooling to room temperature, the raw product was analyzed by <sup>19</sup>F NMR using 4,4'-difluorobiphenyl (-115.0 ppm) as internal standard. The target product **3ah'** (-55.6 ppm)<sup>8</sup> was observed in 10% yield.

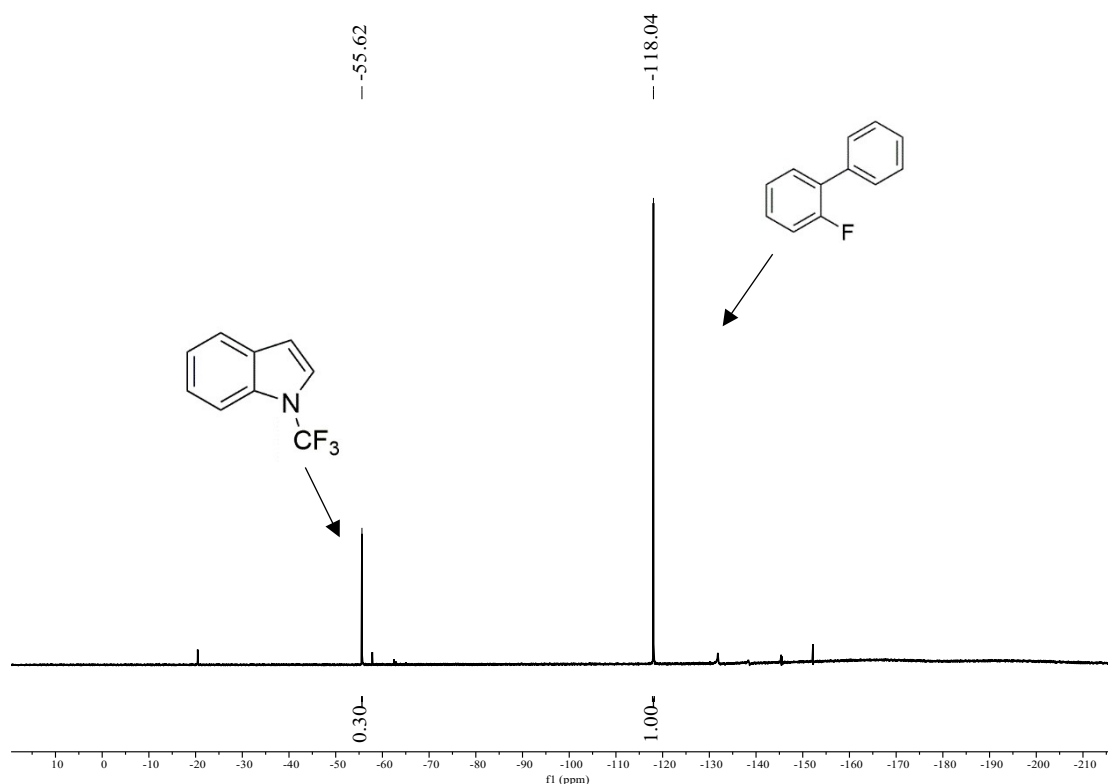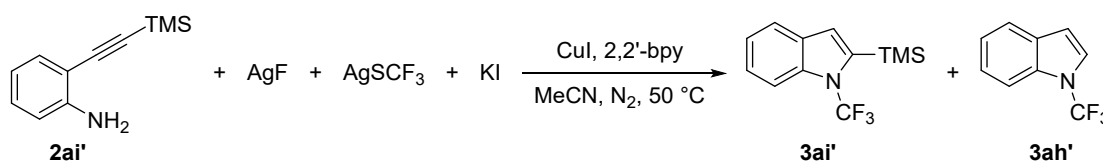

To an oven-dried 10 ml Schlenk tube equipped with a stir bar were added KI (0.15 mmol 24.9 mg, 1.5 equiv.), AgSCF<sub>3</sub> (0.15 mmol, 31.33 mg, 1.5 equiv.), AgF (0.5 mmol, 63.4 mg, 5 equiv.), CuI (0.02mmol, 3.82 mg, 20 mmol%) and 2,2'-Bipyridine (0.02mmol, 3.12 mg, 20 mol%). The Schlenk tube was evacuated and refilled with N<sub>2</sub> (three times). CH<sub>3</sub>CN (2 mL) and 2-((trimethylsilyl)ethynyl)aniline **2ai'** (0.1 mmol, 1.0 equiv. 18.9 mg) was then added by syringe. The reaction mixture was required to heat to 50 °C and then stirred for 4. After cooling to room temperature, the raw product was analyzed by <sup>19</sup>F NMR using 4,4'-difluorobiphenyl (-115.0 ppm) as internal standard. The product **3ah'** (-55.6 ppm) instead of **3ai'** was observed in 18% yield. The signal of TMSF can also be observed at -156.6 ppm in <sup>19</sup>F NMR spectrum (Due to the volatility of this compound, the intensity of the signal is relatively weak in the spectrum).

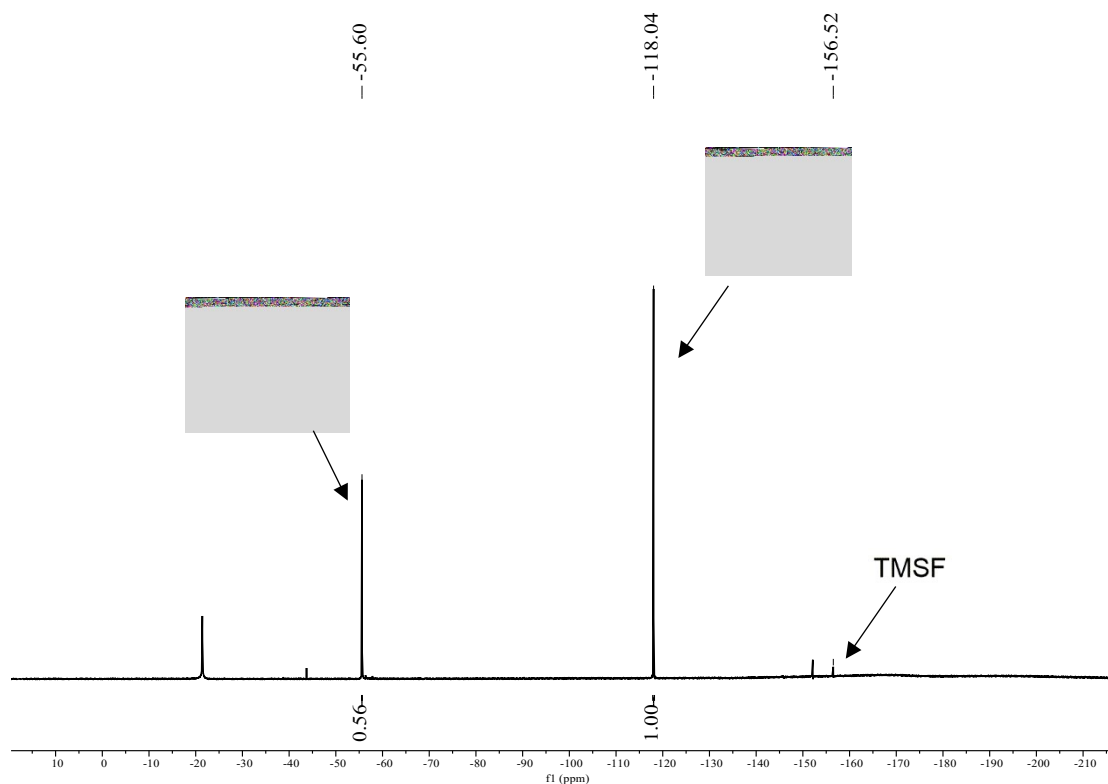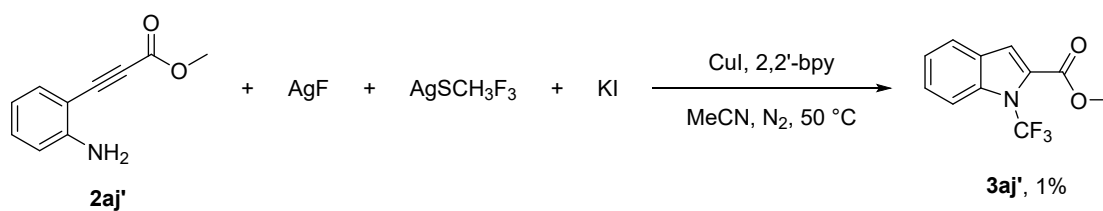

To an oven-dried 10 ml Schlenk tube equipped with a stir bar were added methyl 3-(2-aminophenyl)propiolate **2aj'** (0.1 mmol, 17.51 mg, 1.0 equiv.), KI (0.15 mmol, 24.9 mg, 1.5 equiv.), AgSCF<sub>3</sub> (0.15 mmol, 31.33 mg, 1.5 equiv.), AgF (0.5 mmol, 63.4 mg, 5 equiv.), CuI (0.02mmol, 3.82 mg, 20 mmol%) and 2,2'-Bipyridine (0.02mmol, 3.12 mg, 20 mol%). The Schlenk tube was evacuated and refilled with N<sub>2</sub> (three times). CH<sub>3</sub>CN (30 ml) was then added by syringe. The reaction mixture was required to heat to 50 °C (or 90 °C) and then stirred for 4 h. After cooling to room temperature, the raw product was analyzed by <sup>19</sup>F NMR using 4,4'-difluorobiphenyl (-115.0 ppm) as internal standard. The target product was observed with a yield of 0.1%.

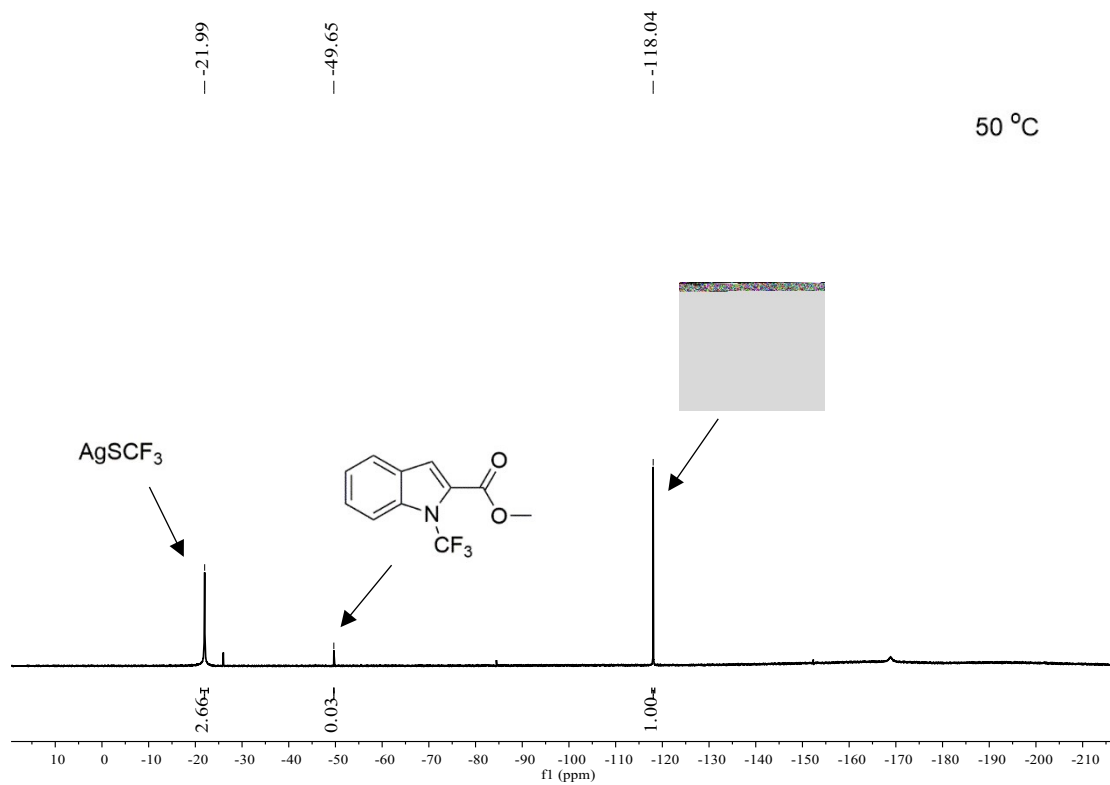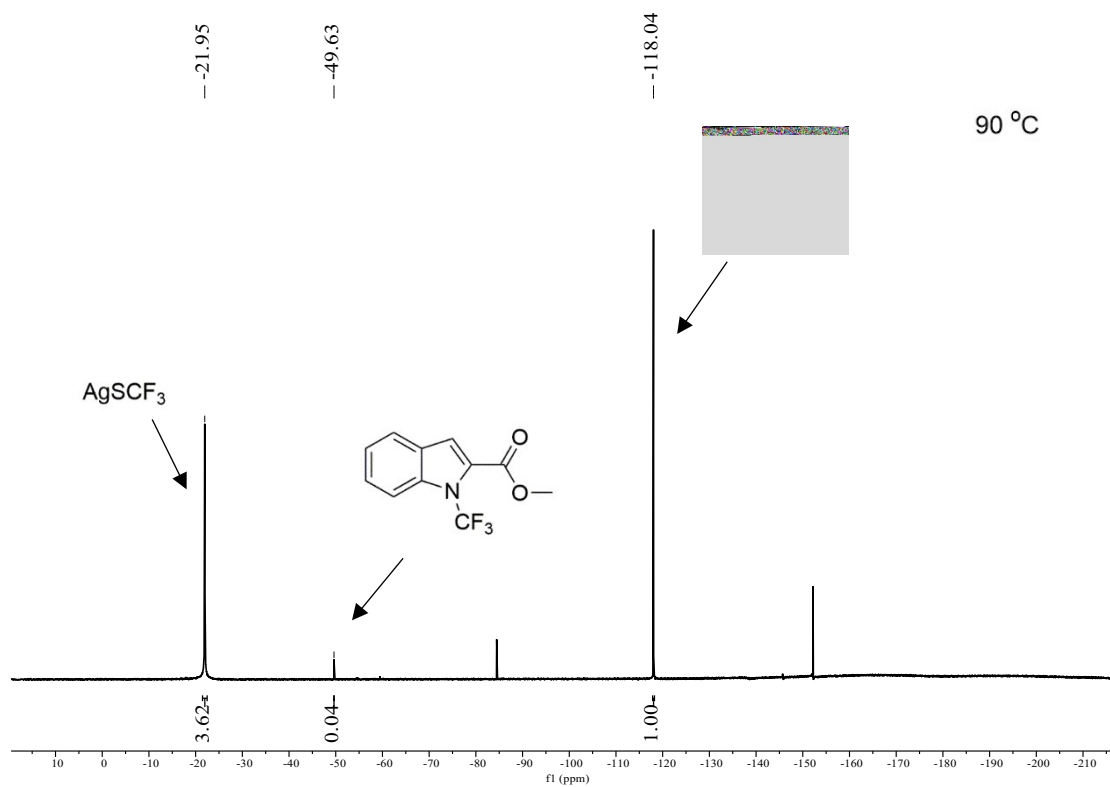

## 6. Identification of byproduct in the synthesis of *N*-trifluoromethyl indole **3aa**

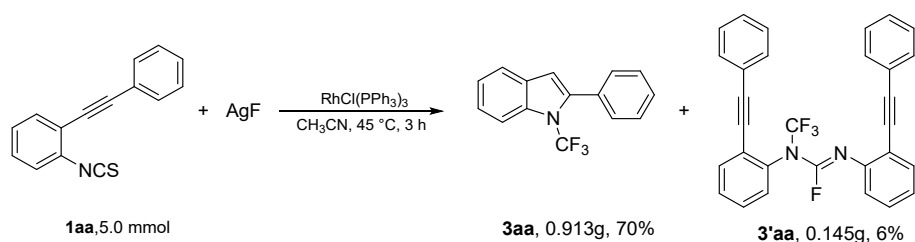

To an oven-dried 50 mL Schlenk tube equipped with a stir bar were added **1aa** (5.00 mmol, 1.180 g, 1.0 equiv.), AgF (16.00 mmol, 2.020 g, 3.2 equiv) and RhCl(PPh<sub>3</sub>)<sub>3</sub> (0.05 mmol, 0.046 mg, 1 mol%). The Schlenk tube was evacuated and refilled with N<sub>2</sub> (three times). CH<sub>3</sub>CN (25 mL) was then added by syringe. The reaction mixture was required to heat to 45 °C and then stirred for 3 h under N<sub>2</sub>. After cooling to room temperature, the reaction mixture was diluted with ethyl acetate, filtered through a plug of celite and was with ethyl acetate, then concentrated under vacuum and purified by silica gel flash column chromatography (200-300 mesh) using petroleum ether (60-90 °C) and ethyl acetate as eluent to afford **3aa** (0.913 g, 70%) and **3'aa** (0.145 g, 6%). **3'aa**: <sup>1</sup>H NMR (400 MHz, CDCl<sub>3</sub>) δ 7.64 (dd, *J* = 7.7, 1.5 Hz, 1H), 7.60–7.52 (m, 4H), 7.50 (dd, *J* = 7.7, 1.5 Hz, 1H), 7.41 (ddd, *J* = 14.3, 7.1, 1.6 Hz, 4H), 7.35 (qd, *J* = 5.2, 4.7, 2.6 Hz, 6H), 7.18 (td, *J* = 7.7, 1.6 Hz, 1H), 7.06 (td, *J* = 7.6, 1.2 Hz, 1H), 6.95 (d, *J* = 8.0 Hz, 1H). <sup>19</sup>F NMR (376 MHz, CDCl<sub>3</sub>) δ -44.95 (s, 1F), -54.47 (d, *J* = 14.3 Hz, 3F).

## 7. Characterization data for the products

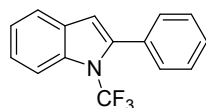

**2-phenyl-1-(trifluoromethyl)-1H-indole (3aa)**. Following the general procedure of **Method A**, compound **3aa** was synthesized and isolated as a colorless oil (0.105 g, 80%) via silica gel flash column chromatography using petroleum ether (60-90 °C) as eluent. This compound can also be obtained as a colorless oil (0.093 g, 71%) via **Method B**. <sup>1</sup>H NMR (400 MHz, CDCl<sub>3</sub>) δ 7.79–7.69 (m, 1H), 7.69–7.62 (m, 1H), 7.57 (dd, *J* = 6.5, 2.8 Hz, 2H), 7.52–7.44 (m, 3H), 7.43–7.30 (m, 2H), 6.69–6.61 (m, 1H). <sup>19</sup>F NMR (376 MHz, CDCl<sub>3</sub>) δ -49.82 (s, 3F). <sup>13</sup>C NMR (101 MHz, CDCl<sub>3</sub>) δ 139.4 (s), 136.0 (s), 132.4 (s), 129.6 (s), 129.3 (s), 128.8 (s), 128.2 (s), 124.4 (s), 123.0 (s), 121.1 (s), 120.7 (q, *J* = 263.2 Hz), 113.2 (q, *J* = 4.3 Hz), 109.8 (s). **HRMS (ESI)** *m/z* calcd. for C<sub>15</sub>H<sub>10</sub>F<sub>3</sub>NH (M+H)<sup>+</sup>: 262.0838; found: 262.0835.

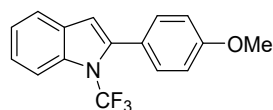

**2-(4-methoxyphenyl)-1-(trifluoromethyl)-1H-indole (3ab).** Following the general procedure of **Method A**, compound **3ab** was synthesized and isolated as a colorless solid (0.090 g, 62%) via silica gel flash column chromatography using petroleum ether (60-90 °C) as eluent. This compound can also be obtained as a colorless solid (0.092 g, 66%) via **Method B**. mp 77-79 °C.  $^1\text{H NMR}$  (400 MHz,  $\text{CDCl}_3$ )  $\delta$  7.70–7.64 (m, 1H), 7.61 (d,  $J = 7.3$  Hz, 1H), 7.45 (d,  $J = 8.6$  Hz, 2H), 7.37–7.32 (m, 1H), 7.29 (td,  $J = 7.5$ , 0.9 Hz, 1H), 7.02–6.94 (m, 1H), 6.57 (s, 1H), 3.88 (s, 3H).  $^{19}\text{F NMR}$  (376 MHz,  $\text{CDCl}_3$ )  $\delta$  -49.86 (s, 3F).  $^{13}\text{C NMR}$  (101 MHz,  $\text{CDCl}_3$ )  $\delta$  160.1 (s), 139.3 (s), 135.9 (s), 131.0–130.8 (m), 129.3 (s), 124.8–124.5 (m), 124.1 (s), 122.9 (s), 120.9 (s), 120.8 (q,  $J = 261.5$  Hz), 113.7 (s), 113.1 (q,  $J = 4.5$  Hz), 109.4 (s), 55.4 (s). **HRMS (ESI)**  $m/z$  calcd. for  $\text{C}_{16}\text{H}_{12}\text{F}_3\text{NOH}$  (M+H) $^+$ : 292.0944; found: 292.0946.

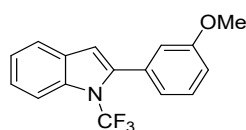

**2-(3-methoxyphenyl)-1-(trifluoromethyl)-1H-indole (3ac).** Following the general procedure of **Method A**, compound **3ac** was synthesized and isolated as a yellow oil (0.090 g, 62%) via silica gel flash column chromatography using petroleum ether (60-90 °C) as eluent. This compound can also be obtained as a yellow oil (0.074 g, 51%) via **Method B**.  $^1\text{H NMR}$  (400 MHz,  $\text{CDCl}_3$ )  $\delta$  7.71–7.65 (m, 1H), 7.63 (d,  $J = 7.2$  Hz, 1H), 7.36 (td,  $J = 8.4$ , 1.6 Hz, 2H), 7.30 (td,  $J = 7.5$ , 1.1 Hz, 1H), 7.12 (d,  $J = 7.6$  Hz, 1H), 7.08 (s, 1H), 7.00 (ddd,  $J = 8.3$ , 2.6, 0.9 Hz, 1H), 6.63 (s, 1H), 3.87 (s, 3H).  $^{19}\text{F NMR}$  (376 MHz,  $\text{CDCl}_3$ )  $\delta$  -49.86 (s, 3F).  $^{13}\text{C NMR}$  (101 MHz,  $\text{CDCl}_3$ )  $\delta$  159.3 (s), 139.2 (s), 136.0 (s), 133.6 (s), 129.2 (d,  $J = 3.9$  Hz), 124.4 (s), 123.0 (s), 122.2–121.9 (m), 121.1 (s), 120.7 (q,  $J = 261.6$  Hz), 115.2 (s), 114.5 (s), 113.2 (q,  $J = 4.3$  Hz), 109.8 (s), 55.4 (s). **HRMS (ESI)**  $m/z$  calcd. for  $\text{C}_{16}\text{H}_{12}\text{F}_3\text{NOH}$  (M+H) $^+$ : 292.0944; found: 292.0949.

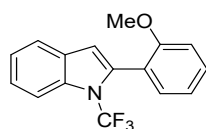

**2-(2-methoxyphenyl)-1-(trifluoromethyl)-1H-indole (3ad).** Following the general procedure of **Method A**, compound **3ad** was synthesized and isolated as a colorless oil (0.073 g, 50%) via silica gel flash column chromatography using petroleum ether (60-90 °C) as eluent. This compound can also be obtained as a colorless oil (0.070 g, 48%) via **Method B**.  $^1\text{H NMR}$  (400 MHz,  $\text{CDCl}_3$ )  $\delta$  7.70–7.65 (m, 1H), 7.63 (d,  $J = 7.8$  Hz, 1H), 7.45 (td,  $J = 8.2$ , 1.7 Hz, 1H), 7.39 (dd,  $J = 7.4$ , 1.7 Hz, 1H), 7.35 (td,  $J = 8.4$ , 7.8, 1.3 Hz, 1H), 7.28 (td,  $J = 7.7$ , 1.0 Hz, 1H), 7.04 (td,  $J = 7.5$ , 0.9 Hz, 1H), 6.97 (d,  $J = 8.3$  Hz, 1H), 6.60–6.53 (m, 1H), 3.81 (s, 3H).  $^{19}\text{F NMR}$  (376 MHz,  $\text{CDCl}_3$ )  $\delta$  -53.52 (s, 3F).  $^{13}\text{C NMR}$  (101 MHz,  $\text{CDCl}_3$ )  $\delta$  158.1 (s), 135.7 (d,  $J = 22.4$  Hz), 131.6 (s), 130.7 (s), 129.2 (s), 124.0 (s), 122.6 (s), 121.8 (s), 121.0 (s), 120.5 (q,  $J = 261.5$  Hz), 120.3



(s), 112.7 (q,  $J = 4.5$  Hz), 110.5 (s), 109.1 (s), 55.5 (s). **HRMS (ESI)**  $m/z$  calcd. for  $C_{16}H_{12}F_3NOH$  (M+H)<sup>+</sup>: 292.0944; found: 292.0956.

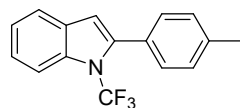

**2-(p-tolyl)-1-(trifluoromethyl)-1H-indole (3ae).** Following the general procedure of **Method A**, compound **3ae** was synthesized and isolated as a yellow oil (0.107 g, 78%) via silica gel flash column chromatography using petroleum ether (60-90 °C) as eluent. This compound can also be obtained as a yellow oil (0.095 g, 69%) via **Method B**. **<sup>1</sup>H NMR** (400 MHz,  $CDCl_3$ )  $\delta$  7.62–7.56 (m, 1H), 7.55–7.50 (m, 1H), 7.33 (d,  $J = 8.0$  Hz, 2H), 7.29–7.24 (m, 1H), 7.22 (dd,  $J = 7.6, 1.1$  Hz, 1H), 7.20–7.15 (m, 2H), 6.51 (s, 1H), 2.36 (s, 3H). **<sup>19</sup>F NMR** (376 MHz,  $CDCl_3$ )  $\delta$  -49.83 (s, 3F). **<sup>13</sup>C NMR** (101 MHz,  $CDCl_3$ )  $\delta$  139.6 (s), 138.8 (s), 136.0 (s), 129.6–129.4 (m), 129.3 (s), 128.9 (s), 124.2 (s), 123.0 (s), 121.0 (s), 120.7 (q,  $J = 263.4$  Hz), 113.2 (q,  $J = 4.4$  Hz), 109.5 (s), 21.5 (s). **HRMS (ESI)**  $m/z$  calcd. for  $C_{16}H_{12}F_3NH$  (M+H)<sup>+</sup>: 276.0995; found: 276.0996.

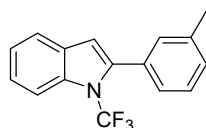

**2-(m-tolyl)-1-(trifluoromethyl)-1H-indole (3af).** Following the general procedure of **Method A**, compound **3af** was synthesized and isolated as a colorless oil (0.105 g, 76%) via silica gel flash column chromatography using petroleum ether (60-90 °C) as eluent. **<sup>1</sup>H NMR** (400 MHz,  $CDCl_3$ )  $\delta$  7.71–7.65 (m, 1H), 7.64–7.60 (m, 1H), 7.39–7.29 (m, 5H), 7.29–7.25 (m, 1H), 6.61 (s, 1H), 2.44 (s, 3H). **<sup>19</sup>F NMR** (376 MHz,  $CDCl_3$ )  $\delta$  -49.87 (s, 3F). **<sup>13</sup>C NMR** (101 MHz,  $CDCl_3$ )  $\delta$  139.6 (s), 137.9 (s), 136.0 (s), 132.3 (s), 130.2 (s), 129.6 (s), 129.3 (s), 128.1 (s), 126.8–126.5 (m), 124.3 (s), 123.0 (s), 121.1 (s), 120.7 (q,  $J = 263.3$  Hz), 113.2 (q,  $J = 4.3$  Hz), 109.7 (s), 21.5 (s). **HRMS (ESI)**  $m/z$  calcd. for  $C_{16}H_{12}F_3NH$  (M+H)<sup>+</sup>: 276.0995; found: 276.0989.

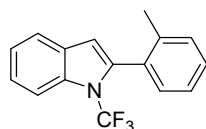

**2-(o-tolyl)-1-(trifluoromethyl)-1H-indole (3ag).** Following the general procedure of **Method A**, compound **3ag** was synthesized and isolated as a yellow oil (0.076 g, 55%) via silica gel flash column chromatography using petroleum ether (60-90 °C) as eluent. **<sup>1</sup>H NMR** (400 MHz,  $CDCl_3$ )  $\delta$  7.71–7.67 (m, 1H), 7.66–7.63 (m, 1H), 7.38 (dtd,  $J = 8.3, 5.8, 5.3, 1.5$  Hz, 3H), 7.32 (td,  $J = 7.6, 1.1$  Hz, 2H), 7.27 (t,  $J = 7.4$  Hz, 1H), 6.58–6.50 (m, 1H), 2.25 (s, 3H). **<sup>19</sup>F NMR** (376 MHz,  $CDCl_3$ )  $\delta$  -51.95 (s, 3F). **<sup>13</sup>C NMR** (101 MHz,  $CDCl_3$ )  $\delta$  138.1 (d,  $J = 34.9$  Hz), 135.4 (s), 131.9 (s), 130.9 (s), 129.9 (s), 129.3 (d,  $J = 5.4$  Hz), 125.4 (s), 124.2 (s), 122.9 (s), 121.0 (s), 120.6 (q,  $J = 263.3$  Hz),

112.9 (q,  $J = 4.1$  Hz), 109.3 (s), 20.0 (s). **HRMS (ESI)**  $m/z$  calcd. for  $C_{16}H_{12}F_3NH$  ( $M+H$ )<sup>+</sup>: 276.0995; found: 276.0982.

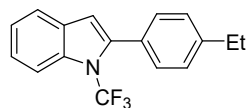

**2-(4-ethylphenyl)-1-(trifluoromethyl)-1H-indole (3ah).** Following the general procedure of **Method A**, compound **3ah** was synthesized and isolated as a colorless oil (0.108 g, 75%) via silica gel flash column chromatography using petroleum ether (60–90 °C) as eluent. **<sup>1</sup>H NMR** (400 MHz,  $CDCl_3$ )  $\delta$  7.72–7.67 (m, 1H), 7.65–7.60 (m, 1H), 7.46 (d,  $J = 8.0$  Hz, 2H), 7.39–7.34 (m, 1H), 7.31 (t,  $J = 7.3$  Hz, 3H), 6.61 (s, 1H), 2.76 (q,  $J = 7.6$  Hz, 2H), 1.33 (t,  $J = 7.6$  Hz, 3H). **<sup>19</sup>F NMR** (376 MHz,  $CDCl_3$ )  $\delta$  -49.83 (s, 3F). **<sup>13</sup>C NMR** (101 MHz,  $CDCl_3$ )  $\delta$  145.0 (s), 139.6 (s), 136.0 (s), 129.7 (s), 129.5 (d,  $J = 1.1$  Hz), 129.3 (s), 127.7 (s), 124.2 (s), 123.0 (s), 121.0 (s), 120.7 (q,  $J = 261.6$  Hz), 113.2 (q,  $J = 4.4$  Hz), 109.6 (s), 28.8 (s), 15.5 (s). **HRMS (ESI)**  $m/z$  calcd. for  $C_{17}H_{14}F_3NH$  ( $M+H$ )<sup>+</sup>: 290.1151; found: 290.1151.

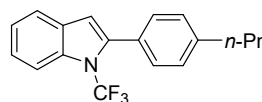

**2-(4-propylphenyl)-1-(trifluoromethyl)-1H-indole (3ai).** Following the general procedure of **Method A**, compound **3ai** was synthesized and isolated as a colorless oil (0.114 g, 75%) via silica gel flash column chromatography using petroleum ether (60–90 °C) as eluent. This compound can also be obtained as a colorless oil (0.038 g, 25%) via **Method B**. **<sup>1</sup>H NMR** (400 MHz,  $CDCl_3$ )  $\delta$  7.73–7.65 (m, 1H), 7.66–7.59 (m, 1H), 7.44 (d,  $J = 8.0$  Hz, 2H), 7.38–7.32 (m, 1H), 7.31 (dd,  $J = 7.6, 1.0$  Hz, 1H), 7.26 (d,  $J = 8.2$  Hz, 2H), 6.60 (s, 1H), 2.86–2.41 (m, 2H), 1.73 (m,  $J = 7.4$  Hz, 2H), 1.01 (t,  $J = 7.3$  Hz, 3H). **<sup>19</sup>F NMR** (376 MHz,  $CDCl_3$ )  $\delta$  -49.84 (s, 3F). **<sup>13</sup>C NMR** (101 MHz,  $CDCl_3$ )  $\delta$  143.5 (s), 139.6 (s), 136.0 (s), 129.7 (s), 129.5 – 129.3 (m), 129.3 (s), 128.3 (s), 124.2 (s), 123.0 (s), 121.0 (s), 120.7 (q,  $J = 261.8$  Hz), 113.2 (q,  $J = 4.4$  Hz), 109.5 (s), 38.0 (s), 24.6 (s), 14.0 (s). **HRMS (ESI)**  $m/z$  calcd. for  $C_{18}H_{16}F_3NH$  ( $M+H$ )<sup>+</sup>: 304.1308; found: 304.1310.

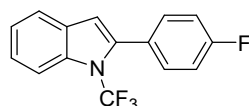

**2-(4-fluorophenyl)-1-(trifluoromethyl)-1H-indole (3aj).** Following the general procedure of **Method A**, compound **3aj** was synthesized and isolated as a colorless oil (0.089 g, 64%) via silica gel flash column chromatography using petroleum ether (60–90 °C) as eluent. This compound can also be obtained as a colorless oil (0.101 g, 72%) via **Method B**. **<sup>1</sup>H NMR** (400 MHz,  $CDCl_3$ )  $\delta$  7.71–7.65 (m, 1H), 7.62 (d,  $J = 7.3$  Hz, 1H), 7.49 (dd,  $J = 8.5, 5.4$  Hz, 2H), 7.41–7.26 (m, 2H), 7.18–7.08 (m, 2H), 6.60 (s, 1H). **<sup>19</sup>F NMR** (376 MHz,  $CDCl_3$ )  $\delta$  -49.89 (s, 3F), -112.57 (s, 1F). **<sup>13</sup>C NMR** (101 MHz,

CDCl<sub>3</sub>)  $\delta$  163.2 (d,  $J$  = 248.6 Hz), 136.0 (s), 131.5 – 131.2 (m), 129.1 (s), 124.5 (s), 123.1 (s), 121.1 (s), 120.7 (q,  $J$  = 263.1 Hz), 115.8 (d,  $J$  = 21.8 Hz), 113.2 (q,  $J$  = 4.4 Hz), 110.0 (s). **HRMS (ESI)**  $m/z$  calcd. for C<sub>15</sub>H<sub>9</sub>F<sub>4</sub>NH (M+H)<sup>+</sup>: 280.0744; found: 280.0738.

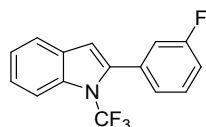

**2-(3-fluorophenyl)-1-(trifluoromethyl)-1H-indole (3ak).** Following the general procedure of **Method A**, compound **3ak** was synthesized and isolated as a colorless oil (0.098 g, 70%) via silica gel flash column chromatography using petroleum ether (60–90 °C) as eluent. This compound can also be obtained as a colorless oil (0.061 g, 44%) via **Method B**. **<sup>1</sup>H NMR** (400 MHz, CDCl<sub>3</sub>)  $\delta$  7.71–7.65 (m, 1H), 7.63 (d,  $J$  = 7.6 Hz, 1H), 7.43–7.35 (m, 2H), 7.34–7.28 (m, 2H), 7.24 (d,  $J$  = 9.5 Hz, 1H), 7.15 (tdd,  $J$  = 8.5, 2.6, 1.0 Hz, 1H), 6.64 (s, 1H). **<sup>19</sup>F NMR** (376 MHz, CDCl<sub>3</sub>)  $\delta$  -49.92 (s, 3F), -113.14 (s, 1F). **<sup>13</sup>C NMR** (101 MHz, CDCl<sub>3</sub>)  $\delta$  162.4 (d,  $J$  = 246.6 Hz), 137.8 (d,  $J$  = 2.3 Hz), 136.1 (s), 134.3 (d,  $J$  = 7.6 Hz), 129.8 (d,  $J$  = 8.5 Hz), 129.1 (s), 125.4 (dd,  $J$  = 2.8, 1.3 Hz), 124.7 (s), 123.2 (s), 121.3 (s), 120.6 (q,  $J$  = 261.8 Hz), 116.5 (d,  $J$  = 22.5 Hz), 115.8 (d,  $J$  = 21.1 Hz), 113.2 (q,  $J$  = 4.3 Hz), 110.4 (s). **HRMS (ESI)**  $m/z$  calcd. for C<sub>15</sub>H<sub>9</sub>F<sub>4</sub>NH (M+H)<sup>+</sup>: 280.0744; found: 280.0745.

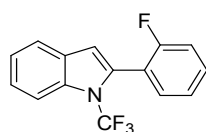

**2-(2-fluorophenyl)-1-(trifluoromethyl)-1H-indole (3al).** Following the general procedure of **Method A**, compound **3al** was synthesized and isolated as a colorless oil (0.073 g, 52%) via silica gel flash column chromatography using petroleum ether (60–90 °C) as eluent. This compound can also be obtained as a colorless oil (0.049 g, 35%) via **Method B**. **<sup>1</sup>H NMR** (400 MHz, CDCl<sub>3</sub>)  $\delta$  7.71–7.66 (m, 1H), 7.65 (d,  $J$  = 7.8 Hz, 1H), 7.50–7.42 (m, 2H), 7.38 (td,  $J$  = 8.4, 7.8, 1.3 Hz, 1H), 7.34–7.28 (m, 1H), 7.23 (td,  $J$  = 7.6, 1.0 Hz, 1H), 7.18 (t,  $J$  = 9.0 Hz, 1H), 6.67 (s, 1H). **<sup>19</sup>F NMR** (376 MHz, CDCl<sub>3</sub>)  $\delta$  -52.61 (d,  $J$  = 5.1 Hz, 3F), -112.86 (q,  $J$  = 5.1 Hz, 1F). **<sup>13</sup>C NMR** (101 MHz, CDCl<sub>3</sub>)  $\delta$  160.6 (d,  $J$  = 249.4 Hz), 135.9 (s), 132.4 (s), 132.0 (d,  $J$  = 1.9 Hz), 131.1 (d,  $J$  = 8.1 Hz), 129.1 (s), 124.6 (s), 124.0 (d,  $J$  = 3.7 Hz), 123.0 (s), 121.2 (s), 120.5 (q,  $J$  = 262.6 Hz), 120.4 (d,  $J$  = 15.7 Hz), 115.6 (d,  $J$  = 21.6 Hz), 112.9 (q,  $J$  = 3.7 Hz), 110.7 (s). **HRMS (ESI)**  $m/z$  calcd. for C<sub>15</sub>H<sub>9</sub>F<sub>4</sub>NH (M+H)<sup>+</sup>: 280.0744; found: 280.0735.

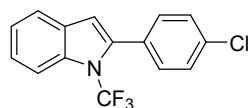

**2-(4-chlorophenyl)-1-(trifluoromethyl)-1H-indole (3am).** Following the general procedure of **Method A**, compound **3am** was synthesized and isolated as a colorless

solid (0.074 g, 50%) via silica gel flash column chromatography using petroleum ether (60-90 °C) as eluent. This compound can also be obtained as a colorless solid (0.075 g, 51%) via **Method B**. mp 23-24 °C.  $^1\text{H NMR}$  (400 MHz,  $\text{CDCl}_3$ )  $\delta$  7.71 – 7.64 (m, 1H), 7.62 (d,  $J = 7.8$  Hz, 1H), 7.48 – 7.40 (m, 4H), 7.36 (ddd,  $J = 8.4, 7.3, 1.4$  Hz, 1H), 7.30 (td,  $J = 7.6, 1.0$  Hz, 1H), 6.61 (s, 1H).  $^{19}\text{F NMR}$  (376 MHz,  $\text{CDCl}_3$ )  $\delta$  -49.88 (s, 3F).  $^{13}\text{C NMR}$  (101 MHz,  $\text{CDCl}_3$ )  $\delta$  138.0 (s), 136.1 (s), 135.0 (s), 130.9 – 130.7 (m), 129.1 (s), 128.5 (s), 124.6 (s), 123.2 (s), 121.2 (s), 120.6 (q,  $J = 263.5$  Hz), 113.2 (q,  $J = 4.3$  Hz), 110.2 (s). **HRMS (ESI)**  $m/z$  calcd. for  $\text{C}_{15}\text{H}_9\text{ClF}_3\text{NH}$  ( $\text{M}+\text{H}$ ) $^+$ : 296.048; found: 296.0433.

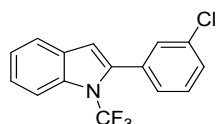

**2-(3-chlorophenyl)-1-(trifluoromethyl)-1H-indole (3an)**. Following the general procedure of **Method A**, compound **3an** was synthesized and isolated as a colorless oil (0.102 g, 69%) via silica gel flash column chromatography using petroleum ether (60-90 °C) as eluent.  $^1\text{H NMR}$  (400 MHz,  $\text{CDCl}_3$ )  $\delta$  7.70–7.65 (m, 1H), 7.63 (d,  $J = 7.8$  Hz, 1H), 7.52 (s, 1H), 7.44–7.34 (m, 4H), 7.31 (td,  $J = 7.7, 0.9$  Hz, 1H), 6.63 (s, 1H).  $^{19}\text{F NMR}$  (376 MHz,  $\text{CDCl}_3$ )  $\delta$  -49.93 (s, 3F).  $^{13}\text{C NMR}$  (101 MHz,  $\text{CDCl}_3$ )  $\delta$  137.7 (s), 136.1 (s), 134.1 (d,  $J = 10.1$  Hz), 129.6–129.5 (m), 129.5 (s), 129.1 (s), 129.0 (s), 127.8 (d,  $J = 1.3$  Hz), 124.8 (s), 123.2 (s), 121.3 (s), 120.6 (q,  $J = 261.8$  Hz), 113.2 (q,  $J = 4.3$  Hz), 110.5 (s). **HRMS (ESI)**  $m/z$  calcd. for  $\text{C}_{15}\text{H}_9\text{ClF}_3\text{NH}$  ( $\text{M}+\text{H}$ ) $^+$ : 296.0448; found: 296.0438.

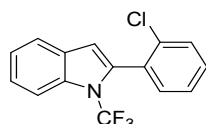

**2-(2-chlorophenyl)-1-(trifluoromethyl)-1H-indole (3ao)**. Following the general procedure of **Method A**, compound **3ao** was synthesized and isolated as a colorless solid (0.087 g, 59%) via silica gel flash column chromatography using petroleum ether (60-90 °C) as eluent. mp 70-71 °C.  $^1\text{H NMR}$  (400 MHz,  $\text{CDCl}_3$ )  $\delta$  7.72–7.63 (m, 2H), 7.51 (dd,  $J = 8.0, 1.1$  Hz, 1H), 7.49–7.27 (m, 5H), 6.62 (s, 1H).  $^{19}\text{F NMR}$  (376 MHz,  $\text{CDCl}_3$ )  $\delta$  -52.47 (s, 3F).  $^{13}\text{C NMR}$  (101 MHz,  $\text{CDCl}_3$ )  $\delta$  135.4 (s), 135.2 (s), 132.3 (s), 131.6 (s), 130.6 (s), 129.5 (s), 129.0 (s), 126.4 (s), 124.6 (s), 123.0 (s), 121.3 (s), 120.4 (q,  $J = 261.5$  Hz), 112.8 (q,  $J = 3.7$  Hz), 110.3–110.0 (m). **HRMS (ESI)**  $m/z$  calcd. for  $\text{C}_{15}\text{H}_9\text{ClF}_3\text{NH}$  ( $\text{M}+\text{H}$ ) $^+$ : 296.0448; found: 296.0441.

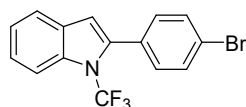

**2-(4-bromophenyl)-1-(trifluoromethyl)-1H-indole (3ap)**. Following the general procedure of **Method A**, compound **3ap** was synthesized and isolated as a colorless oil

(0.116 g, 68%) via silica gel flash column chromatography using petroleum ether (60–90 °C) as eluent. This compound can also be obtained as a colorless oil (0.070 g, 41%) via **Method B**. **<sup>1</sup>H NMR** (400 MHz, CDCl<sub>3</sub>) δ 7.69–7.64 (m, 1H), 7.62 (d, *J* = 7.8 Hz, 1H), 7.60–7.56 (m, 2H), 7.41–7.34 (m, 3H), 7.30 (td, *J* = 7.6, 1.0 Hz, 1H), 6.61 (s, 1H). **<sup>19</sup>F NMR** (376 MHz, CDCl<sub>3</sub>) δ -49.87 (s, 3F). **<sup>13</sup>C NMR** (101 MHz, CDCl<sub>3</sub>) δ 138.0 (s), 136.1 (s), 131.5 (s), 131.3 (s), 131.2–131.0 (m), 129.1 (s), 124.7 (s), 123.2 (d, *J* = 2.4 Hz), 121.2 (s), 120.6 (q, *J* = 261.8 Hz), 113.2 (q, *J* = 4.3 Hz), 110.2 (s). **HRMS (ESI)** *m/z* calcd. for C<sub>15</sub>H<sub>9</sub>BrF<sub>3</sub>NH (M+H)<sup>+</sup>: 339.9943; found: 339.9914.

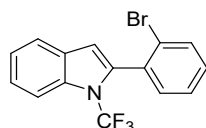

**2-(2-bromophenyl)-1-(trifluoromethyl)-1H-indole (3aq)**. Following the general procedure of **Method A**, compound **3aq** was synthesized and isolated as a colorless solid (0.099 g, 58%) via silica gel flash column chromatography using petroleum ether (60–90 °C) as eluent. mp 68–69 °C. **<sup>1</sup>H NMR** (400 MHz, CDCl<sub>3</sub>) δ 7.73–7.63 (m, 3H), 7.45 (dd, *J* = 7.5, 1.8 Hz, 1H), 7.42–7.36 (m, 2H), 7.36–7.29 (m, 2H), 6.62 (s, 1H). **<sup>19</sup>F NMR** (376 MHz, CDCl<sub>3</sub>) δ -52.18 (s, 3F). **<sup>13</sup>C NMR** (101 MHz, CDCl<sub>3</sub>) δ 136.7 (s), 135.2 (s), 133.7 (s), 132.7 (s), 132.4 (s), 130.7 (s), 129.0 (s), 127.0 (s), 125.2 (s), 124.6 (s), 123.0 (s), 121.4 (s), 120.4 (q, *J* = 261.7 Hz), 112.8 (q, *J* = 3.7 Hz), 110.1 (s). **HRMS (ESI)** *m/z* calcd. for C<sub>15</sub>H<sub>9</sub>BrF<sub>3</sub>NH (M+H)<sup>+</sup>: 339.9943; found: 339.9943.

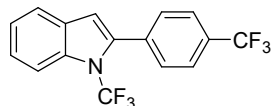

**1-(trifluoromethyl)-2-(4-(trifluoromethyl)phenyl)-1H-indole (3ar)**. Following the general procedure of **Method A**, compound **3ar** was synthesized and isolated as a colorless solid (0.122 g, 74%) via silica gel flash column chromatography using petroleum ether (60–90 °C) as eluent. This compound can also be obtained as a colorless solid (0.079 g, 48%) via **Method B**. mp 46–47 °C. **<sup>1</sup>H NMR** (400 MHz, CDCl<sub>3</sub>) δ 7.75–7.61 (m, 6H), 7.39 (t, *J* = 7.5 Hz, 1H), 7.32 (t, *J* = 7.4 Hz, 1H), 6.67 (s, 1H). **<sup>19</sup>F NMR** (376 MHz, CDCl<sub>3</sub>) δ -49.90 (s, 3F), -62.69 (s, 3F). **<sup>13</sup>C NMR** (101 MHz, CDCl<sub>3</sub>) δ 137.6 (s), 136.3 (s), 136.0 (s), 130.9 (q, *J* = 32.6 Hz), 129.8 (s), 129.1 (s), 125.3 (q, *J* = 3.7 Hz), 125.0 (s), 124.2 (q, *J* = 270.4 Hz), 123.4 (s), 121.4 (s), 120.6 (q, *J* = 261.7 Hz), 113.3 (q, *J* = 4.2 Hz), 110.9 (s). **HRMS (ESI)** *m/z* calcd. for C<sub>16</sub>H<sub>9</sub>F<sub>6</sub>NH (M+H)<sup>+</sup>: 330.0712; found: 330.0710.

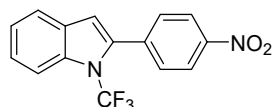

**2-(4-nitrophenyl)-1-(trifluoromethyl)-1H-indole (3as)**. Following the general procedure of **Method A**, compound **3as** was synthesized and isolated as a yellow solid

(0.081 g, 53%) via silica gel flash column chromatography using petroleum ether/ethyl acetate (petroleum ether:ethyl acetate = 100:1) as eluent. This compound can also be obtained as a yellow solid (0.061 g, 40%) via **Method B**. mp 108–110 °C.  $^1\text{H NMR}$  (400 MHz,  $\text{CDCl}_3$ )  $\delta$  8.35–8.26 (m, 2H), 7.67 (dd,  $J = 15.0, 8.2$  Hz, 3H), 7.45–7.36 (m, 1H), 7.38–7.29 (m, 1H), 6.74 (s, 1H).  $^{19}\text{F NMR}$  (376 MHz,  $\text{CDCl}_3$ )  $\delta$  -49.87 (s, 3F).  $^{13}\text{C NMR}$  (101 MHz,  $\text{CDCl}_3$ )  $\delta$  147.9 (s), 138.8 (s), 136.6 (d,  $J = 13.4$  Hz), 130.3–130.0 (m), 129.0 (s), 125.4 (s), 123.6 (s), 121.6 (s), 120.5 (q,  $J = 262.1$  Hz), 113.4 (q,  $J = 4.1$  Hz), 111.8 (s). **HRMS (ESI)**  $m/z$  calcd. for  $\text{C}_{15}\text{H}_9\text{F}_3\text{N}_2\text{O}_2\text{H}$  ( $\text{M}+\text{H}$ ) $^+$ : 307.0689; found: 307.0682.

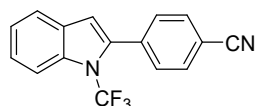

**4-(1-(trifluoromethyl)-1H-indol-2-yl)benzonitrile (3at)**. Following the general procedure of **Method A**, compound **3at** was synthesized and isolated as a colorless solid (0.100 g, 70%) via silica gel flash column chromatography using petroleum ether/ethyl acetate (petroleum ether: ethyl acetate = 50:1) as eluent. This compound can also be obtained as a colorless solid (0.109 g, 76%) via **Method B**. mp 101–102 °C.  $^1\text{H NMR}$  (400 MHz,  $\text{CDCl}_3$ )  $\delta$  7.73 (d,  $J = 8.5$  Hz, 2H), 7.69–7.66 (m, 1H), 7.63 (t,  $J = 7.4$  Hz, 3H), 7.42–7.37 (m, 1H), 7.35–7.29 (m, 1H), 6.69 (s, 1H).  $^{19}\text{F NMR}$  (376 MHz,  $\text{CDCl}_3$ )  $\delta$  -49.90 (s, 3F).  $^{13}\text{C NMR}$  (101 MHz,  $\text{CDCl}_3$ )  $\delta$  137.1 (s), 136.9 (s), 136.4 (s), 132.1 (s), 130.1–129.8 (m), 129.0 (s), 125.3 (s), 123.5 (s), 121.5 (s), 120.5 (q,  $J = 262.1$  Hz), 118.6 (s), 113.3 (q,  $J = 4.2$  Hz), 112.5 (s), 111.4 (s). **HRMS (ESI)**  $m/z$  calcd. for  $\text{C}_{16}\text{H}_9\text{F}_3\text{N}_2\text{H}$  ( $\text{M}+\text{H}$ ) $^+$ : 287.0791; found: 287.0784.

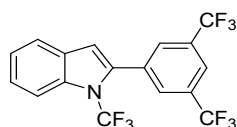

**2-(3,5-bis(trifluoromethyl)phenyl)-1-(trifluoromethyl)-1H-indole (3au)**. Following the general procedure of **Method A**, compound **3au** was synthesized and isolated as a colorless oil (0.093 g, 47%) via silica gel flash column chromatography using petroleum ether (60–90 °C) as eluent.  $^1\text{H NMR}$  (400 MHz,  $\text{CDCl}_3$ )  $\delta$  7.97 (d,  $J = 6.9$  Hz, 3H), 7.71–7.67 (m, 1H), 7.66 (d,  $J = 7.8$  Hz, 1H), 7.41 (dd,  $J = 8.4, 1.3$  Hz, 1H), 7.37–7.31 (m, 1H), 6.76 (s, 1H).  $^{19}\text{F NMR}$  (376 MHz,  $\text{CDCl}_3$ )  $\delta$  -50.06 (s, 3F), -63.00 (s, 6F).  $^{13}\text{C NMR}$  (101 MHz,  $\text{CDCl}_3$ )  $\delta$  136.5 (s), 135.7 (s), 134.5 (s), 131.9 (q,  $J = 33.7$  Hz), 129.9–129.1 (m), 128.9 (s), 125.6 (s), 123.7 (s), 123.2 (q,  $J = 271.1$  Hz), 122.6 (p,  $J = 3.8$  Hz), 121.6 (s), 120.6 (q,  $J = 261.8$  Hz), 113.4 (q,  $J = 4.2$  Hz), 112.1 (s). **HRMS (ESI)**  $m/z$  calcd. for  $\text{C}_{17}\text{H}_8\text{F}_9\text{NH}$  ( $\text{M}+\text{H}$ ) $^+$ : 398.0586; found: 398.0583.

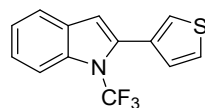

**2-(thiophen-3-yl)-1-(trifluoromethyl)-1H-indole (3av).** Following the general procedure of **Method A**, compound **3av** was synthesized and isolated as a colorless oil (0.107 g, 80%) via silica gel flash column chromatography using petroleum ether (60-90 °C) as eluent. <sup>1</sup>H NMR (400 MHz, CDCl<sub>3</sub>) δ 7.64 (d, *J* = 8.3 Hz, 1H), 7.58 (d, *J* = 7.5 Hz, 1H), 7.45 (dd, *J* = 2.9, 1.0 Hz, 1H), 7.36 (dd, *J* = 5.0, 3.0 Hz, 1H), 7.25 (dd, *J* = 14.1, 6.8 Hz, 2H), 6.63 (s, 1H). <sup>19</sup>F NMR (376 MHz, CDCl<sub>3</sub>) δ -50.23 (s, 3F). <sup>13</sup>C NMR (101 MHz, CDCl<sub>3</sub>) δ 135.9 (s), 134.0 (s), 132.1 (s), 129.0 (s), 129.0 – 128.6 (m), 125.4 (s), 125.3 (s), 124.4 (s), 123.0 (s), 121.0 (s), 120.7 (q, *J* = 261.3 Hz), 113.1 (q, *J* = 4.7 Hz), 109.9 (s). **HRMS (AP)** *m/z* calcd. for C<sub>13</sub>H<sub>8</sub>F<sub>3</sub>NS (M)<sup>+</sup>: 267.0430; found: 267.0330.

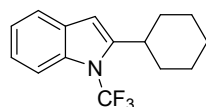

**2-cyclohexyl-1-(trifluoromethyl)-1H-indole (3aw).** Following the general procedure of **Method A**, compound **3aw** was synthesized and isolated as a colorless oil (0.104 g, 78%) via silica gel flash column chromatography using petroleum ether (60-90 °C) as eluent. <sup>1</sup>H NMR (400 MHz, CDCl<sub>3</sub>) δ 7.64–7.57 (m, 1H), 7.56–7.50 (m, 1H), 7.31–7.18 (m, 2H), 6.45 (s, 1H), 2.85 (s, 1H), 2.11 (t, *J* = 9.7 Hz, 2H), 1.89 (dd, *J* = 5.3, 2.5 Hz, 2H), 1.81 (ddt, *J* = 11.1, 3.0, 1.4 Hz, 1H), 1.45 (p, *J* = 11.7 Hz, 5H). <sup>19</sup>F NMR (376 MHz, CDCl<sub>3</sub>) δ -51.35 (s, 3F). <sup>13</sup>C NMR (101 MHz, CDCl<sub>3</sub>) δ 146.2 (s), 135.3 (s), 129.4 (s), 123.4 (s), 122.5 (s), 121.2 (q, *J* = 260.2 Hz), 120.5 (s), 112.7 (q, *J* = 5.1 Hz), 104.6 (s), 37.1 (q, *J* = 2.9 Hz), 34.3 (s), 26.8 (s), 26.3 (s). **HRMS (AP)** *m/z* calcd. for C<sub>15</sub>H<sub>16</sub>F<sub>3</sub>N [M]<sup>+</sup>: 267.1380, found 267.1235.

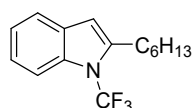

**2-hexyl-1-(trifluoromethyl)-1H-indole (3ax).** Following the general procedure of **Method A**, compound **3ax** was synthesized and isolated as a colorless oil (0.102 g, 76%) via silica gel flash column chromatography using petroleum ether (60-90 °C) as eluent. This compound can also be obtained as a colorless oil (0.035 g, 26%) via **Method B**. <sup>1</sup>H NMR (400 MHz, CDCl<sub>3</sub>) δ 7.63–7.56 (m, 1H), 7.53 (dd, *J* = 6.8, 1.8 Hz, 1H), 7.24 (pd, *J* = 7.2, 6.7, 1.4 Hz, 2H), 6.43 (s, 1H), 2.84 (t, *J* = 7.7 Hz, 2H), 1.77 (p, *J* = 7.5 Hz, 2H), 1.42 (ddq, *J* = 33.4, 7.1, 3.2 Hz, 6H), 1.01–0.88 (m, 3H). <sup>19</sup>F NMR (376 MHz, CDCl<sub>3</sub>) δ -51.89 (s, 3F). <sup>13</sup>C NMR (101 MHz, CDCl<sub>3</sub>) δ 140.3 (s), 135.6 (s), 129.3 (s), 123.4 (s), 122.5 (s), 121.1 (q, *J* = 260.0 Hz), 120.4 (s), 112.5 (q, *J* = 4.8 Hz), 106.3 (s), 31.8 (s), 29.2 (s), 28.4 (s), 28.0 (q, *J* = 3.2 Hz), 22.8 (s), 14.2 (s). **HRMS (AP)** *m/z* calcd. for C<sub>15</sub>H<sub>18</sub>F<sub>3</sub>NH (M+H)<sup>+</sup>: 270.1470; found: 270.1477.

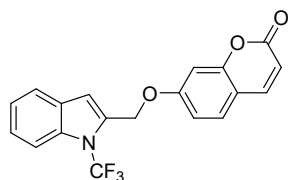

**7-((1-(trifluoromethyl)-1H-indol-2-yl)methoxy)-2H-chromen-2-one (3ay).**

Following the general procedure of **Method A**, compound **3ay** was synthesized and isolated as a colorless solid (0.140 g, 78%) via silica gel flash column chromatography using petroleum ether/ethyl acetate (petroleum ether:ethyl acetate = 20:1) as eluent. mp 113-114 °C. **<sup>1</sup>H NMR** (400 MHz, CDCl<sub>3</sub>) δ 7.61 (dd, *J* = 14.8, 8.7 Hz, 3H), 7.43–7.32 (m, 2H), 7.30–7.25 (m, 1H), 6.92 (d, *J* = 7.5 Hz, 2H), 6.79 (s, 1H), 6.27 (d, *J* = 9.5 Hz, 1H), 5.28 (s, 2H). **<sup>19</sup>F NMR** (376 MHz, CDCl<sub>3</sub>) δ -53.21 (s, 3F). **<sup>13</sup>C NMR** (101 MHz, CDCl<sub>3</sub>) δ 160.1 (s), 160.0 (s), 154.7 (s), 142.2 (s), 134.9 (s), 131.1 (s), 127.9 (s), 127.1 (s), 124.1 (s), 121.9 (s), 120.5 (s), 112.6 (s), 112.2 (s), 112.1 (s), 119.6 (q, *J* = 261.4 Hz), 111.5 (q, *J* = 4.2 Hz), 109.8 (s), 100.9 (s), 62.5 (q, *J* = 3.4 Hz). **HRMS (AP)** *m/z* calcd. for C<sub>19</sub>H<sub>12</sub>F<sub>3</sub>NO<sub>3</sub> (M)<sup>+</sup>: 359.0769; found: 359.0766.

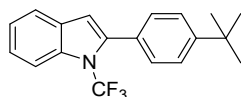

**2-(4-(tert-butyl)phenyl)-1-(trifluoromethyl)-1H-indole (3az).** Following the general procedure of **Method B**, compound **3az** was synthesized and isolated as a colorless solid (0.095 g, 60%) via silica gel flash column chromatography using petroleum ether (60-90 °C) as eluent. mp 52-54 °C. **<sup>1</sup>H NMR** (400 MHz, CDCl<sub>3</sub>) δ 7.65 (d, *J* = 8.2 Hz, 2H), 7.59 (d, *J* = 7.9 Hz, 1H), 7.43 (s, 4H), 7.36–7.26 (m, 2H), 6.57 (s, 1H), 1.37 (s, 9H). **<sup>19</sup>F NMR** (376 MHz, CDCl<sub>3</sub>) δ -49.32 (s, 3F). **<sup>13</sup>C NMR** (101 MHz, CDCl<sub>3</sub>) δ 151.76 (s), 139.43 (s), 135.85 (s), 129.93–128.66 (m), 124.98 (s), 124.04 (s), 122.80 (s), 119.49 (q), 120.85 (s), 113.01 (q, *J* = 4.4 Hz), 109.44 (s), 34.72 (s), 31.31 (s). **HRMS (AP)** *m/z* calcd. for C<sub>19</sub>H<sub>18</sub>F<sub>3</sub>NH (M+H)<sup>+</sup>: 318.1480; found: 318.1481.

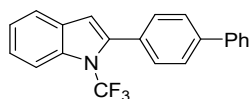

**2-([1,1'-biphenyl]-4-yl)-1-(trifluoromethyl)-1H-indole (3aa').** Following the general procedure of **Method B**, compound **3aa'** was synthesized and isolated as a colorless solid (0.067 g, 40%) via silica gel flash column chromatography using petroleum ether (60-90 °C) as eluent. mp 114-115 °C. **<sup>1</sup>H NMR** (400 MHz, CDCl<sub>3</sub>) δ 7.66 (dt, *J* = 5.6, 3.5 Hz, 5H), 7.63–7.56 (m, 3H), 7.47 (t, *J* = 7.6 Hz, 2H), 7.41–7.26 (m, 3H), 6.64 (s, 1H). **<sup>19</sup>F NMR** (376 MHz, CDCl<sub>3</sub>) δ -49.27 (s, 3F). **<sup>13</sup>C NMR** (101 MHz, CDCl<sub>3</sub>) δ 140.94 (d, *J* = 108.1 Hz), 138.98 (s), 135.99 (s), 131.14 (s), 129.85–129.66 (m), 129.17 (s), 128.87 (s), 127.64 (s), 126.94 (d, *J* = 36.8 Hz), 124.27 (s), 122.93 (s), 120.97 (s), δ



120.60 (q,  $J = 263.2$  Hz), 113.08 (q,  $J = 4.3$  Hz), 109.82 (s). **HRMS (AP)**  $m/z$  calcd. for  $C_{21}H_{14}F_3NH$  (M+H)<sup>+</sup>: 338.1157; found: 338.1142.

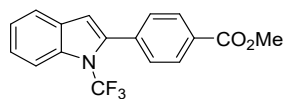

**methyl 4-(1-(trifluoromethyl)-1H-indol-2-yl)benzoate (3ab')**. Following the general procedure of **Method B**, compound **3ab'** was synthesized and isolated as a colorless solid (0.120 g, 75%) via silica gel flash column chromatography using petroleum ether (60-90 °C) as eluent. mp 54-55 °C. **<sup>1</sup>H NMR** (400 MHz, CDCl<sub>3</sub>)  $\delta$  8.10 (d,  $J = 8.4$  Hz, 2H), 7.60 (dd,  $J = 13.7, 7.9$  Hz, 4H), 7.33 (dtd,  $J = 26.4, 7.3, 1.2$  Hz, 2H), 6.66 (s, 1H), 3.95 (s, 3H). **<sup>19</sup>F NMR** (376 MHz, CDCl<sub>3</sub>)  $\delta$  -49.41 (s, 3F). **<sup>13</sup>C NMR** (101 MHz, CDCl<sub>3</sub>)  $\delta$  166.65 (s), 138.05 (s), 136.45 (d,  $J = 51.9$  Hz), 130.22 (s), 129.42 – 129.20 (m), 129.01 (s), 124.73 (s), 123.15 (s), 121.20 (s),  $\delta$  120.48 (q,  $J = 263.6$  Hz), 113.14 (q,  $J = 4.2$  Hz), 110.64 (s), 52.26 (s). **HRMS (AP)**  $m/z$  calcd. for  $C_{17}H_{12}F_3NO_2H$  (M+H)<sup>+</sup>: 320.0898; found: 320.0898.

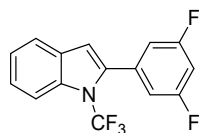

**2-(3,5-difluorophenyl)-1-(trifluoromethyl)-1H-indole (3ac')**. Following the general procedure of **Method B**, compound **3ac'** was synthesized and isolated as a colorless solid (0.030 g, 20%) via silica gel flash column chromatography using petroleum ether (60-90 °C) as eluent. mp 56-58 °C. **<sup>1</sup>H NMR** (400 MHz, CDCl<sub>3</sub>)  $\delta$  7.63 (dd,  $J = 15.7, 8.1$  Hz, 2H), 7.40 – 7.33 (m, 1H), 7.29 (t,  $J = 7.5$  Hz, 1H), 7.04 (d,  $J = 5.9$  Hz, 2H), 6.88 (tt,  $J = 8.9, 2.3$  Hz, 1H), 6.64 (s, 1H). **<sup>19</sup>F NMR** (376 MHz, CDCl<sub>3</sub>)  $\delta$  -49.53 (s, 3F), -109.18 (s, 2F). **<sup>13</sup>C NMR** (101 MHz, CDCl<sub>3</sub>)  $\delta$  163.74 (d,  $J = 12.9$  Hz), 161.26 (d,  $J = 13.1$  Hz), 136.51 (t,  $J = 2.8$  Hz), 136.08, 135.07 (d,  $J = 10.7$  Hz), 128.74 (s), 124.11 (d,  $J = 172.7$  Hz), 121.30 (s),  $\delta$  119.02 (q), 113.16 (q,  $J = 4.3$  Hz), 112.73–112.33 (m), 104.22 (t,  $J = 25.2$  Hz). **HRMS (AP)**  $m/z$  calcd. for  $C_{15}H_8F_5NH$  (M+H)<sup>+</sup>: 298.0655; found: 298.0652.

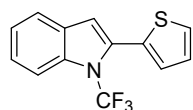

**2-(thiophen-2-yl)-1-(trifluoromethyl)-1H-indole (3ad')**. Following the general procedure of **Method B**, compound **3ad'** was synthesized and isolated as a brown oil (0.094 g, 70%) via silica gel flash column chromatography using petroleum ether (60-90 °C) as eluent. **<sup>1</sup>H NMR** (400 MHz, CDCl<sub>3</sub>)  $\delta$  7.64 (d,  $J = 8.3$  Hz, 1H), 7.58 (d,  $J = 7.8$  Hz, 1H), 7.40 (d,  $J = 6.0$  Hz, 1H), 7.36–7.29 (m, 1H), 7.29–7.22 (m, 2H), 7.10 (dd,  $J = 5.1, 3.7$  Hz, 1H), 6.74 (s, 1H). **<sup>19</sup>F NMR** (376 MHz, CDCl<sub>3</sub>)  $\delta$  -49.36 (s, 3F). **<sup>13</sup>C NMR** (101 MHz, CDCl<sub>3</sub>)  $\delta$  135.91 (s), 131.97 (s), 131.13 (s), 128.92–128.77 (m),

128.60 (s), 127.12 (d,  $J = 27.9$  Hz), 124.72 (s), 122.94 (s), 121.05 (s), 120.51 (q,  $J = 263.3$  Hz), 113.01 (q,  $J = 5.0$  Hz), 111.54 (s). **HRMS (AP)**  $m/z$  calcd. for  $C_{13}H_8F_3NSH$  ( $M+H$ )<sup>+</sup>: 268.0408; found: 268.0401.

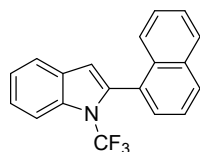

**2-(naphthalen-1-yl)-1-(trifluoromethyl)-1H-indole (3ae')**. Following the general procedure of **Method B**, compound **3ae'** was synthesized and isolated as a colorless solid (0.089 g, 57%) via silica gel flash column chromatography using petroleum ether (60-90 °C) as eluent. mp 39-41 °C. **<sup>1</sup>H NMR** (400 MHz,  $CDCl_3$ )  $\delta$  7.92 (dd,  $J = 18.1, 8.1$  Hz, 2H), 7.70 (d,  $J = 8.6$  Hz, 2H), 7.66 (d,  $J = 7.5$  Hz, 1H), 7.59–7.47 (m, 3H), 7.47–7.30 (m, 3H), 6.69 (s, 1H). **<sup>19</sup>F NMR** (376 MHz,  $CDCl_3$ )  $\delta$  -51.21 (s, 3F). **<sup>13</sup>C NMR** (101 MHz,  $CDCl_3$ )  $\delta$  136.67 (s), 135.66 (s), 133.34 (d,  $J = 5.7$  Hz), 129.87 (s), 129.67 (s), 129.34 (s), 128.80 (s), 128.29 (s), 126.50 (d,  $J = 52.1$  Hz), 125.84 (s), 124.95 (s), 124.42 (s), 123.06 (s), 121.17 (s), 119.81 (q,  $J = 263.5$  Hz), 112.97 (q,  $J = 4.0$  Hz), 110.84(s). **HRMS (AP)**  $m/z$  calcd. for  $C_{19}H_{12}F_3NH$  ( $M+H$ )<sup>+</sup>: 312.1000; found: 312.1014.

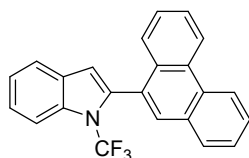

**2-(phenanthren-9-yl)-1-(trifluoromethyl)-1H-indole (3af')**. Following the general procedure of **Method B**, compound **3af'** was synthesized and isolated as a colorless solid (0.103 g, 57%) via silica gel flash column chromatography using petroleum ether (60-90 °C) as eluent. mp 47-49 °C. **<sup>1</sup>H NMR** (400 MHz,  $CDCl_3$ ) 8.78 – 8.71 (m, 2H), 7.92 (d,  $J = 7.9$  Hz, 1H), 7.86 (s, 1H), 7.76 – 7.62 (m, 6H), 7.56 – 7.51 (m, 1H), 7.44 – 7.37 (m, 1H), 7.37 – 7.31 (m, 1H), 7.25 (s, 1H), 6.76 (s, 1H). **<sup>19</sup>F NMR** (376 MHz,  $CDCl_3$ )  $\delta$  -51.43 (s, 3F). **<sup>13</sup>C NMR** (101 MHz,  $CDCl_3$ )  $\delta$  136.81 (s), 135.67 (s), 132.09 (s), 130.94 (d,  $J = 8.0$  Hz), 130.21 (s), 129.99 (s), 129.37 (s), 129.17 (s), 128.76 (s), 127.69 (s), 127.11 (d,  $J = 7.0$  Hz), 126.80 (d,  $J = 28.0$  Hz), 124.50 (s), 123.10 (s), 122.85 (d,  $J = 10.7$  Hz), 121.23 (s), 120.62 (q,  $J = 263.4$  Hz), 112.95 (q,  $J = 3.8$  Hz), 110.87 (s). **HRMS (AP)**  $m/z$  calcd. for  $C_{23}H_{14}F_3NH$  ( $M+H$ )<sup>+</sup>: 362.1157; found: 362.1170.

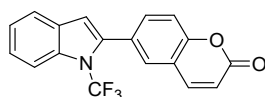

**6-(1-(trifluoromethyl)-1H-indol-2-yl)-2H-chromen-2-one (3ag')**. Following the general procedure of **Method B**, compound **3ag'** was synthesized and isolated as a yellow solid (0.040 g, 24%) via silica gel flash column chromatography using petroleum ether/ethyl acetate (ether:ethyl acetate = 20:1) as eluent. mp 106-108 °C. **<sup>1</sup>H**

**NMR** (400 MHz, CDCl<sub>3</sub>)  $\delta$  7.74 (d,  $J$  = 9.6 Hz, 1H), 7.70 – 7.59 (m, 4H), 7.38 (dd,  $J$  = 13.7, 7.8 Hz, 2H), 7.31 (t,  $J$  = 7.4 Hz, 1H), 6.64 (s, 1H), 6.49 (d,  $J$  = 9.5 Hz, 1H). **<sup>19</sup>F NMR** (376 MHz, CDCl<sub>3</sub>)  $\delta$  -49.39 (s, 3F). **<sup>13</sup>C NMR** (101 MHz, CDCl<sub>3</sub>)  $\delta$  160.37 (s), 154.13 (s), 143.10 (s), 136.47 (d,  $J$  = 109.6 Hz), 132.89 (s), 128.96 – 128.54 (m), 124.76 (s), 123.21 (s), 121.14 (s), 121.67 (q), 118.55 (s), 117.12 (d,  $J$  = 64.7 Hz), 113.09 (q,  $J$  = 4.3 Hz), 110.60 (s). **HRMS (AP)**  $m/z$  calcd. for C<sub>18</sub>H<sub>10</sub>F<sub>3</sub>NO<sub>2</sub>H [M+H]<sup>+</sup>: 330.0742; found: 330.0759.

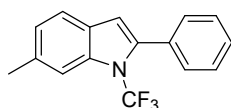

**6-methyl-2-phenyl-1-(trifluoromethyl)-1H-indole (3ba)**. Following the general procedure of **Method A**, compound **3ba** was synthesized and isolated as a colorless oil (0.084 g, 61%) via silica gel flash column chromatography using petroleum ether as eluent. This compound can also be obtained as a colorless oil (0.039 g, 28%) via **Method B**. **<sup>1</sup>H NMR** (400 MHz, CDCl<sub>3</sub>)  $\delta$  7.55–7.46 (m, 4H), 7.46–7.40 (m, 3H), 7.13 (d,  $J$  = 8.1 Hz, 1H), 6.56 (s, 1H), 2.53 (s, 3H). **<sup>19</sup>F NMR** (376 MHz, CDCl<sub>3</sub>)  $\delta$  -49.94 (s, 3F). **<sup>13</sup>C NMR** (101 MHz, CDCl<sub>3</sub>)  $\delta$  138.8 (s), 136.5 (s), 134.4 (s), 132.6 (s), 129.5 (s), 128.6 (s), 128.2 (s), 127.1 (s), 124.6 (s), 120.7 (q,  $J$  = 261.4 Hz), 120.7 (s), 113.3 (q,  $J$  = 4.2 Hz), 109.7 (s), 22.1 (s). **HRMS (AP)**  $m/z$  calcd. for C<sub>16</sub>H<sub>12</sub>F<sub>3</sub>NH (M)<sup>+</sup>: 276.0995; found: 276.1001.

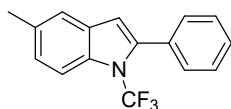

**5-methyl-2-phenyl-1-(trifluoromethyl)-1H-indole (3bb)**. Following the general procedure of **Method A**, compound **3bb** was synthesized and isolated as a yellow oil (0.081 g, 59%) via silica gel flash column chromatography using petroleum ether (60–90 °C) as eluent. This compound can also be obtained as a yellow oil (0.045 g, 33%) via **Method B**. **<sup>1</sup>H NMR** (400 MHz, CDCl<sub>3</sub>)  $\delta$  7.54 (ddd,  $J$  = 13.6, 7.0, 1.9 Hz, 3H), 7.47–7.43 (m, 3H), 7.41 (s, 1H), 7.18 (dd,  $J$  = 8.5, 1.3 Hz, 1H), 6.55 (s, 1H), 2.49 (s, 3H). **<sup>19</sup>F NMR** (376 MHz, CDCl<sub>3</sub>)  $\delta$  -50.03 (s, 3F). **<sup>13</sup>C NMR** (101 MHz, CDCl<sub>3</sub>)  $\delta$  139.5 (s), 134.3 (s), 132.7 (s), 132.6 (s), 132.5 (s), 129.7 – 129.3 (m), 128.7 (s), 128.2 (s), 125.8 (s), 120.9 (s), 120.8 (q,  $J$  = 261.3 Hz), 112.9 (q,  $J$  = 4.2 Hz), 109.6 (s), 21.4 (s). **HRMS (ESI)**  $m/z$  calcd. for C<sub>16</sub>H<sub>12</sub>F<sub>3</sub>NH (M+H)<sup>+</sup>: 276.0995; found: 276.0995.

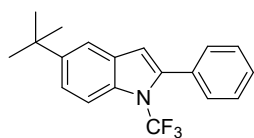

**5-(tert-butyl)-2-phenyl-1-(trifluoromethyl)-1H-indole (3bc)**. Following the general procedure of **Method A**, compound **3bc** was synthesized and isolated as a colorless oil (0.090 g, 57%) via silica gel flash column chromatography using petroleum ether (60–

90 °C) as eluent.  $^1\text{H NMR}$  (400 MHz,  $\text{CDCl}_3$ )  $\delta$  7.60 (dd,  $J = 11.6, 1.9$  Hz, 2H), 7.50 (dd,  $J = 6.5, 2.9$  Hz, 2H), 7.46–7.40 (m, 4H), 6.58 (s, 1H), 1.42 (s, 9H).  $^{19}\text{F NMR}$  (376 MHz,  $\text{CDCl}_3$ )  $\delta$  -50.03 (s, 3F).  $^{13}\text{C NMR}$  (101 MHz,  $\text{CDCl}_3$ )  $\delta$  146.2 (s), 139.5 (s), 134.2 (s), 132.5 (s), 129.6 (s), 129.2 (s), 128.7 (s), 128.2 (s), 122.5 (s), 120.8 (q,  $J = 261.4$  Hz), 117.2 (s), 112.7 (q,  $J = 4.2$  Hz), 110.0 (s), 34.8 (s), 31.9 (s). **HRMS (AP)**  $m/z$  calcd. for  $\text{C}_{19}\text{H}_{18}\text{F}_3\text{NH}$  ( $\text{M}+\text{H}$ ) $^+$ : 318.1470; found: 318.1479.

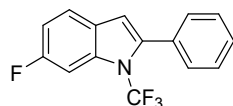

**6-fluoro-2-phenyl-1-(trifluoromethyl)-1H-indole (3bd).** Following the general procedure of **Method A**, compound **3bd** was synthesized and isolated as a colorless oil (0.091 g, 65%) via silica gel flash column chromatography using petroleum ether (60–90 °C) as eluent.  $^1\text{H NMR}$  (400 MHz,  $\text{CDCl}_3$ )  $\delta$  7.57–7.48 (m, 3H), 7.49–7.41 (m, 3H), 7.41–7.35 (m, 1H), 7.11–6.99 (m, 1H), 6.58 (s, 1H).  $^{19}\text{F NMR}$  (376 MHz,  $\text{CDCl}_3$ )  $\delta$  -50.24 (s, 3F), -116.99 (s, 1F).  $^{13}\text{C NMR}$  (101 MHz,  $\text{CDCl}_3$ )  $\delta$  160.8 (d,  $J = 241.0$  Hz), 139.7 (d,  $J = 4.0$  Hz), 136.0 (d,  $J = 12.4$  Hz), 132.0 (s), 129.8–129.3 (m), 128.9 (s), 128.3 (s), 125.5 (s), 121.9 (d,  $J = 9.9$  Hz), 120.5 (q,  $J = 262.0$  Hz), 111.5 (d,  $J = 24.1$  Hz), 109.4 (s), 100.6 (dq,  $J = 28.5, 4.6$  Hz). **HRMS (ESI)**  $m/z$  calcd. for  $\text{C}_{15}\text{H}_9\text{F}_4\text{NH}$  ( $\text{M}+\text{H}$ ) $^+$ : 280.0744; found: 280.0734.

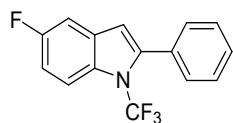

**5-fluoro-2-phenyl-1-(trifluoromethyl)-1H-indole (3be):** Following the general procedure of **Method A**, compound **3be** was synthesized and isolated as a colorless oil (0.108 g, 77%) via silica gel flash column chromatography using petroleum ether (60–90 °C) as eluent. This compound can also be obtained as a colorless oil (0.081 g, 58%) via **Method B**.  $^1\text{H NMR}$  (400 MHz,  $\text{CDCl}_3$ )  $\delta$  7.59 (ddd,  $J = 8.9, 4.1, 2.0$  Hz, 1H), 7.51 (dd,  $J = 6.6, 2.9$  Hz, 2H), 7.50–7.41 (m, 3H), 7.27 (dd,  $J = 8.6, 2.7$  Hz, 1H), 7.08 (td,  $J = 9.1, 2.6$  Hz, 1H), 6.59–6.55 (m, 1H).  $^{19}\text{F NMR}$  (376 MHz,  $\text{CDCl}_3$ )  $\delta$  -50.10 (s, 3F), -120.68 (s, 1F).  $^{13}\text{C NMR}$  (101 MHz,  $\text{CDCl}_3$ )  $\delta$  159.5 (d,  $J = 239.3$  Hz), 141.1 (s), 132.2 (d,  $J = 36.8$  Hz), 130.1 (d,  $J = 10.1$  Hz), 129.5 (d,  $J = 1.0$  Hz), 129.1 (s), 128.3 (s), 120.6 (q,  $J = 261.6$  Hz), 114.1 (dd,  $J = 9.3, 4.6$  Hz), 112.4 (d,  $J = 25.7$  Hz), 109.6 (d,  $J = 3.3$  Hz), 106.4 (d,  $J = 23.8$  Hz). **HRMS (ESI)**  $m/z$  calcd. for  $\text{C}_{15}\text{H}_9\text{F}_4\text{NH}$  ( $\text{M}+\text{H}$ ) $^+$ : 280.0736; found: 280.0744.

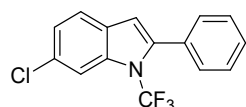

**6-chloro-2-phenyl-1-(trifluoromethyl)-1H-indole (3bf).** Following the general procedure of **Method A**, compound **3bf** was synthesized and isolated as a colorless oil

(0.096 g, 65%) via silica gel flash column chromatography using petroleum ether (60–90 °C) as eluent.  $^1\text{H NMR}$  (400 MHz,  $\text{CDCl}_3$ )  $\delta$  7.68 (s, 1H), 7.55–7.48 (m, 3H), 7.48–7.42 (m, 3H), 7.28 (dd,  $J = 8.4, 1.8$  Hz, 1H), 6.58 (s, 1H).  $^{19}\text{F NMR}$  (376 MHz,  $\text{CDCl}_3$ )  $\delta$  -49.97 (s, 3F).  $^{13}\text{C NMR}$  (101 MHz,  $\text{CDCl}_3$ )  $\delta$  140.0 (s), 136.2 (s), 131.8 (s), 130.2 (s), 129.5 (s), 129.1 (s), 128.3 (s), 127.7 (s), 123.7 (s), 121.8 (s), 120.4 (q,  $J = 263.9$  Hz), 113.4 (q,  $J = 4.7$  Hz), 109.4 (s). **HRMS (ESI)**  $m/z$  calcd. for  $\text{C}_{15}\text{H}_9\text{ClF}_3\text{NH}$  ( $\text{M}+\text{H}$ ) $^+$ : 296.0448; found: 296.0437.

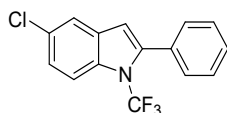

**5-chloro-2-phenyl-1-(trifluoromethyl)-1H-indole (3bg).** Following the general procedure of **Method A**, compound **3bg** was synthesized and isolated as a colorless solid (0.109 g, 74%) via silica gel flash column chromatography using petroleum ether (60–90 °C) as eluent. This compound can also be obtained as a colorless solid (0.064 g, 43%) via **Method B**. mp 61–63 °C.  $^1\text{H NMR}$  (400 MHz,  $\text{CDCl}_3$ )  $\delta$  7.57 (dd,  $J = 9.4, 1.9$  Hz, 2H), 7.51 (dd,  $J = 6.7, 2.9$  Hz, 2H), 7.48–7.43 (m, 3H), 7.30 (dd,  $J = 8.9, 2.1$  Hz, 1H), 6.55 (s, 1H).  $^{19}\text{F NMR}$  (376 MHz,  $\text{CDCl}_3$ )  $\delta$  -49.98 (s, 3F).  $^{13}\text{C NMR}$  (101 MHz,  $\text{CDCl}_3$ )  $\delta$  140.8 (s), 134.3 (s), 131.8 (s), 130.4 (s), 129.5 (d,  $J = 1.1$  Hz), 129.1 (s), 128.8 (s), 128.3 (s), 124.6 (s), 120.6 (s), 120.5 (q,  $J = 262.1$  Hz), 114.2 (q,  $J = 4.5$  Hz), 109.1 (s). **HRMS (ESI)**  $m/z$  calcd. for  $\text{C}_{15}\text{H}_9\text{ClF}_3\text{NH}$  ( $\text{M}+\text{H}$ ) $^+$ : 296.0448; found: 296.0438.

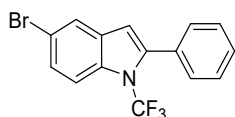

**5-bromo-2-phenyl-1-(trifluoromethyl)-1H-indole (3bh).** Following the general procedure of **Method A**, compound **3bh** was synthesized and isolated as a colorless solid (0.122 g, 72%) via silica gel flash column chromatography using petroleum ether (60–90 °C) as eluent to afford the product. This compound can also be obtained as a colorless solid (0.122 g, 72%) via **Method B**. mp 57–59 °C.  $^1\text{H NMR}$  (400 MHz,  $\text{CDCl}_3$ )  $\delta$  7.75 (d,  $J = 1.9$  Hz, 1H), 7.56–7.48 (m, 3H), 7.47–7.41 (m, 4H), 6.55 (s, 1H).  $^{19}\text{F NMR}$  (376 MHz,  $\text{CDCl}_3$ )  $\delta$  -49.95 (s, 3F).  $^{13}\text{C NMR}$  (101 MHz,  $\text{CDCl}_3$ )  $\delta$  140.6 (s), 134.6 (s), 131.7 (s), 130.9 (s), 129.8–129.3 (m), 129.1 (s), 128.3 (s), 127.2 (s), 123.7 (s), 120.4 (q,  $J = 262.2$  Hz), 116.3 (s), 114.6 (q,  $J = 4.5$  Hz), 108.9 (s). **HRMS (AP)**  $m/z$  calcd. for  $\text{C}_{15}\text{H}_9\text{BrF}_3\text{NH}$  ( $\text{M}+\text{H}$ ) $^+$ : 339.9949; found: 339.9955.

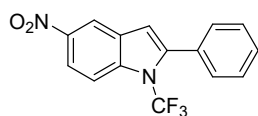

**5-nitro-2-phenyl-1-(trifluoromethyl)-1H-indole (3bi).** Following the general procedure of **Method A**, compound **3bi** was synthesized and isolated as a yellow solid

(0.110 g, 72%) via silica gel flash column chromatography using petroleum ether/ethyl acetate (petroleum ether:ethyl acetate = 100:1) as eluent. This compound can also be obtained as a yellow solid (0.031 g, 20%) via **Method B**. mp 84–86 °C. **<sup>1</sup>H NMR** (400 MHz, CDCl<sub>3</sub>) δ 8.54 (d, *J* = 2.2 Hz, 1H), 8.23 (dd, *J* = 9.2, 2.3 Hz, 1H), 7.73 (dd, *J* = 9.2, 1.8 Hz, 1H), 7.49 (qd, *J* = 6.6, 5.4, 3.3 Hz, 5H), 6.75 (s, 1H). **<sup>19</sup>F NMR** (376 MHz, CDCl<sub>3</sub>) δ -49.81 (s, 3F). **<sup>13</sup>C NMR** (101 MHz, CDCl<sub>3</sub>) δ 144.0 (s), 142.4 (s), 138.5 (s), 131.0 (s), 129.6 (s), 129.6–129.4 (m), 128.9 (s), 128.5 (s), 120.1 (q, *J* = 265.0 Hz), 119.5 (s), 117.4 (s), 113.3 (q, *J* = 4.8 Hz), 110.1 (s). **HRMS (ESI)** *m/z* calcd. for C<sub>15</sub>H<sub>9</sub>F<sub>3</sub>N<sub>2</sub>O<sub>2</sub>H (M+H)<sup>+</sup>: 307.0689; found: 307.0681.

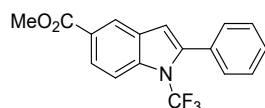

**methyl 2-phenyl-1-(trifluoromethyl)-1H-indole-5-carboxylate (3bj)**. Following the general procedure of **Method A**, compound **3bj** was synthesized and isolated as a colorless oil (0.118 g, 74%) via silica gel flash column chromatography using petroleum ether (60–90 °C) as eluent. **<sup>1</sup>H NMR** (400 MHz, CDCl<sub>3</sub>) δ 8.35 (s, 1H), 8.04 (d, *J* = 8.8 Hz, 1H), 7.68 (d, *J* = 8.7 Hz, 1H), 7.55–7.40 (m, 5H), 6.67 (s, 1H), 3.96 (s, 3H). **<sup>19</sup>F NMR** (376 MHz, CDCl<sub>3</sub>) δ -49.83 (s, 3F). **<sup>13</sup>C NMR** (101 MHz, CDCl<sub>3</sub>) δ 167.4 (s), 140.6 (s), 138.3 (s), 131.7 (s), 129.7–129.4 (m), 129.1 (s), 128.9 (s), 128.3 (s), 125.6 (s), 125.2 (s), 123.5 (s), 120.4 (q, *J* = 262.5 Hz), 12.8 (q, *J* = 4.5 Hz), 110.0 (s), 52.2 (s). **HRMS (AP)** *m/z* calcd. for C<sub>17</sub>H<sub>12</sub>F<sub>3</sub>NO<sub>2</sub>H (M+H)<sup>+</sup>: 320.0893; found: 320.0997.

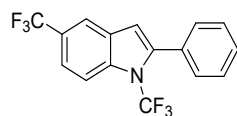

**2-phenyl-1,5-bis(trifluoromethyl)-1H-indole (3bk)**. Following the general procedure of **Method A**, compound **3bk** was synthesized and isolated as a colorless oil (0.115 g, 70%) via silica gel flash column chromatography using petroleum ether (60–90 °C) as eluent. **<sup>1</sup>H NMR** (400 MHz, CDCl<sub>3</sub>) δ 7.92 (s, 1H), 7.81–7.67 (m, 1H), 7.59 (dd, *J* = 8.8, 1.4 Hz, 1H), 7.52 (dd, *J* = 6.8, 2.9 Hz, 2H), 7.47 (dt, *J* = 4.8, 2.1 Hz, 3H), 6.68 (s, 1H). **<sup>19</sup>F NMR** (376 MHz, CDCl<sub>3</sub>) δ -49.86 (s, 3F), -61.20 (s, 3F). **<sup>13</sup>C NMR** (101 MHz, CDCl<sub>3</sub>) δ 141.1 (s), 137.2 (s), 131.6 (s), 129.6 (d, *J* = 1.1 Hz), 129.3 (s), 128.8 (s), 128.4 (s), 125.6 (q, *J* = 32.4 Hz), 124.8 (q, *J* = 270.2 Hz), 121.1 (q, *J* = 3.2 Hz), 120.4 (q, *J* = 264.1 Hz), 118.7 (q, *J* = 4.2 Hz), 113.4 (q, *J* = 4.6 Hz), 109.7 (s). **HRMS (ESI)** *m/z* calcd. for C<sub>16</sub>H<sub>9</sub>F<sub>6</sub>NH (M+H)<sup>+</sup>: 330.0712; found: 330.0717.

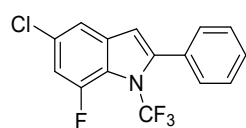

**5-chloro-7-fluoro-2-phenyl-1-(trifluoromethyl)-1H-indole (3bl).** Following the general procedure of **Method A**, compound **3bl** was synthesized and isolated as a colorless solid (0.110 g, 70%) via silica gel flash column chromatography using petroleum ether (60-90 °C) as eluent. This compound can also be obtained as a colorless solid (0.069g, 44%) via **Method B**. mp 76-77 °C. <sup>1</sup>H NMR (400 MHz, CDCl<sub>3</sub>) δ 7.54–7.49 (m, 2H), 7.48–7.41 (m, 3H), 7.40–7.33 (m, 1H), 7.13–7.06 (m, 1H), 6.55 (d, *J* = 1.9 Hz, 1H). <sup>19</sup>F NMR (376 MHz, CDCl<sub>3</sub>) δ -48.37 (d, *J* = 30.0 Hz, 3F), -123.17 (q, *J* = 30.0 Hz, 1F). <sup>13</sup>C NMR (101 MHz, CDCl<sub>3</sub>) δ 150.2 (s), 147.7 (s), 142.5 (s), 133.4 (d, *J* = 4.2 Hz), 131.9 (s), 129.2 (s), 128.9 (d, *J* = 8.9 Hz), 128.8 – 128.6 (m), 128.5 (s), 122.2 (d, *J* = 10.6 Hz), 119.7 (q, *J* = 263.6Hz), 116.5 (d, *J* = 4.0 Hz), 112.0 (d, *J* = 23.8 Hz), 109.0 (s). **HRMS (AP)** *m/z* calcd. for C<sub>15</sub>H<sub>8</sub>ClF<sub>4</sub>NH (M+H)<sup>+</sup>: 314.0354; found: 314.0392.

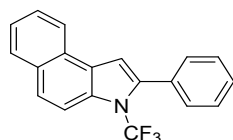

**2-phenyl-3-(trifluoromethyl)-3H-benzo[e]indole (3bm).** Following the general procedure of **Method A**, compound **3bm** was synthesized and isolated as a colorless solid (0.092 g, 59%) via silica gel flash column chromatography using petroleum ether (60-90 °C) as eluent. mp 44-46 °C. <sup>1</sup>H NMR (400 MHz, CDCl<sub>3</sub>) δ 8.18 (d, *J* = 7.9 Hz, 1H), 7.93 (d, *J* = 7.9 Hz, 1H), 7.76 (q, *J* = 8.5 Hz, 2H), 7.63–7.39 (m, 7H), 7.12 (s, 1H). <sup>19</sup>F NMR (376 MHz, CDCl<sub>3</sub>) δ -49.30 (s, 3F). <sup>13</sup>C NMR (101 MHz, CDCl<sub>3</sub>) δ 138.1 (s), 132.6 (d, *J* = 11.1 Hz), 130.2 (s), 129.9–129.5 (m), 128.7 (d, *J* = 10.9 Hz), 128.2 (s), 127.4 (s), 126.6 (s), 125.2 (s), 125.0 (s), 124.8 (s), 123.2 (s), 120.6 (q, *J* = 262.3 Hz), 113.4 (q, *J* = 4.4 Hz), 108.3 (s). **HRMS (AP)** *m/z* calcd. for C<sub>19</sub>H<sub>12</sub>F<sub>3</sub>NH (M+H)<sup>+</sup>: 312.0995; found: 311.1061.

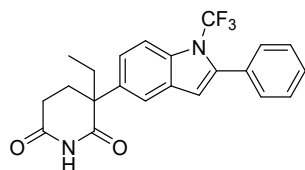

**3-ethyl-3-(2-phenyl-1-(trifluoromethyl)-1H-indol-5-yl)piperidine-2,6-dione (3bn).** Following the general procedure of **Method A**, compound **3bn** was synthesized and isolated as a colorless solid (0.060 g, 30%) via silica gel flash column chromatography using petroleum ether (60-90 °C) as eluent. mp 123-124 °C. <sup>1</sup>H NMR (400 MHz, CDCl<sub>3</sub>) δ 7.99 (s, 1H), 7.69–7.60 (m, 1H), 7.53–7.42 (m, 6H), 7.30–7.25 (m, 1H), 6.57 (s, 1H), 2.63 (dd, *J* = 15.8, 4.7 Hz, 1H), 2.54–2.38 (m, 2H), 2.36–2.23 (m, 1H), 2.06 (ddt, *J* = 41.5, 14.1, 7.3 Hz, 2H), 0.92 (t, *J* = 7.4 Hz, 3H). <sup>19</sup>F NMR (376 MHz, CDCl<sub>3</sub>) δ -49.94 (s, 3F). <sup>13</sup>C NMR (101 MHz, CDCl<sub>3</sub>) δ 175.5 (s), 172.3 (s), 140.3 (s), 135.1 (s), 133.5 (s), 132.0 (s), 129.7 (s), 129.6–129.4 (m), 129.0 (s), 128.3 (s), 122.2 (s), 120.5

(q,  $J = 261.8$  Hz), 119.0 (s), 113.7 (q,  $J = 4.4$  Hz), 109.6 (s), 51.2 (s), 33.4 (s), 29.5 (s), 27.6 (s), 9.3 (s). **HRMS (AP)**  $m/z$  calcd. for  $C_{22}H_{19}F_3N_2O_2H$  ( $M+H$ )<sup>+</sup>: 401.1477; found: 401.1474.

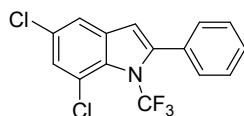

**5,7-dichloro-2-phenyl-1-(trifluoromethyl)-1H-indole (3bo)**. Following the general procedure of **Method B**, compound **3bo** was synthesized and isolated as a colorless solid (0.033 g, 20%) via silica gel flash column chromatography using petroleum ether (60-90 °C) as eluent. mp 80-82 °C. **<sup>1</sup>H NMR** (600 MHz,  $CDCl_3$ )  $\delta$  7.53 (d,  $J = 8.1$  Hz, 2H), 7.48–7.42 (m, 4H), 7.35 (s, 1H), 6.57 (s, 1H), 7.38 (dt,  $J = 24.4, 6.9$  Hz, 2H), 6.77 (s, 1H). **<sup>19</sup>F NMR** (565 MHz,  $CDCl_3$ )  $\delta$  -42.90 (s, 3F). **<sup>13</sup>C NMR** (151 MHz,  $CDCl_3$ )  $\delta$  143.81 (s), 133.56 (s), 132.59 (s), 132.43 (d,  $J = 1.8$  Hz), 129.41 (s), 129.07 (s), 128.68 (s), 128.05 (s), 126.39 (s), 120.33 (s), 119.35 (s), 119.81 (q,  $J = 266.1$  Hz), 109.33 (s). **HRMS (AP)**  $m/z$  calcd. for  $C_{15}H_8Cl_2F_3NH$  ( $M+H$ )<sup>+</sup>: 330.0064; found: 330.0057.

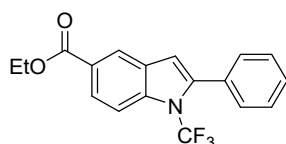

**ethyl 2-phenyl-1-(trifluoromethyl)-1H-indole-5-carboxylate (3bp)**. Following the general procedure of **Method B**, compound **3bp** was synthesized and isolated as a colorless solid (0.138 g, 83%) via silica gel flash column chromatography using petroleum ether/ethyl acetate (petroleum ether:ethyl acetate = 100:1) as eluent. mp 41-42 °C. **<sup>1</sup>H NMR** (600 MHz,  $CDCl_3$ )  $\delta$  8.34 (d,  $J = 1.7$  Hz, 1H), 8.04 (d,  $J = 8.7$  Hz, 1H), 7.67 (d,  $J = 7.0$  Hz, 2H), 7.47 (dt,  $J = 33.3, 3.8$  Hz, 3H), 6.66 (s, 1H), 4.42 (q,  $J = 7.1$  Hz, 2H), 1.43 (t,  $J = 7.1$  Hz, 3H). **<sup>19</sup>F NMR** (565 MHz,  $CDCl_3$ )  $\delta$  -49.21 (s, 3F). **<sup>13</sup>C NMR** (151 MHz,  $CDCl_3$ )  $\delta$  166.80 (s), 140.42 (s), 138.18 (s), 131.64 (s), 129.43 (s), 129.00 (s), 128.75 (s), 128.17 (s), 125.42 (d,  $J = 8.3$  Hz), 123.27 (s), 120.28 (q,  $J = 264.1$  Hz), 112.64 (q,  $J = 4.6$  Hz), 109.92 (s), 60.97 (s), 14.40 (s). **HRMS (AP)**  $m/z$  calcd. for  $C_{18}H_{14}F_3NO_2H$  ( $M+H$ )<sup>+</sup>: 334.1055; found: 334.1058.

## 8. Mechanism study

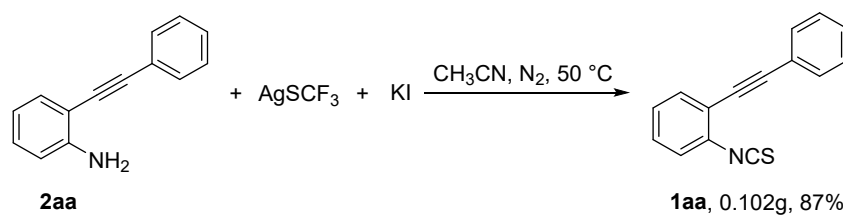

To an oven-dried 25 mL Schlenk tube equipped with a stir bar were added 2-alkynyl arylamine **2aa** (0.5 mmol, 1.0 equiv.),  $AgSCF_3$  (1.5 equiv.),  $KI$  (1.5 equiv.). The Schlenk tube was evacuated and refilled with dry nitrogen (three times).  $CH_3CN$  (5 mL)



was then added by syringe. The reaction mixture was required to heat to 50 °C and then stirred for 1 h under nitrogen. After cooling to room temperature, the reaction mixture was diluted with ethyl acetate, filtered through a plug of celite and was with ethyl acetate, then concentrated under vacuum and purified by silica gel flash column chromatography (200-300 mesh) using petroleum ether (60-90 °C) as eluent to afford 2-alkynyl arylisothiocyanate **1aa** (0.102 g, 87% yield).

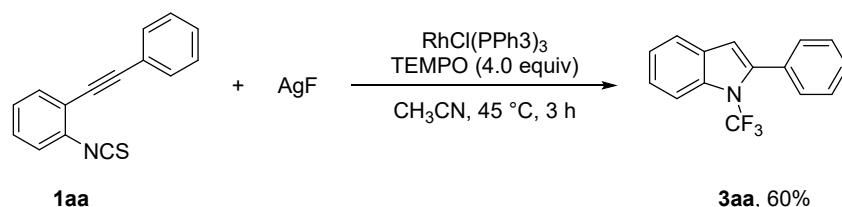

To an oven-dried 25 mL Schlenk tube equipped with a stir bar were added 2-alkynyl arylisothiocyanate **1aa** (0.5 mmol, 1.0equiv.), AgF (3.2 equiv.), TEMPO (4.0 equiv.), RhCl(PPh<sub>3</sub>)<sub>3</sub> (1 mol%). The Schlenk tube was evacuated and refilled with dry nitrogen (three times). CH<sub>3</sub>CN (5 mL) was then added by syringe. The reaction mixture was required to heat to 45 °C and then stirred for 3 h under nitrogen. After cooling to room temperature, the reaction mixture was diluted with dichloromethane. The raw product was analyzed by <sup>19</sup>F NMR using 4,4'-difluorobiphenyl (-115.0 ppm) as internal standard. The final product **3aa** is obtained with a yield of 60%.

## 9. $^1\text{H}$ NMR, $^{13}\text{C}$ NMR and $^{19}\text{F}$ NMR spectra of the products

$^1\text{H}$  NMR spectrum of **3aa** (400 MHz,  $\text{CDCl}_3$ )

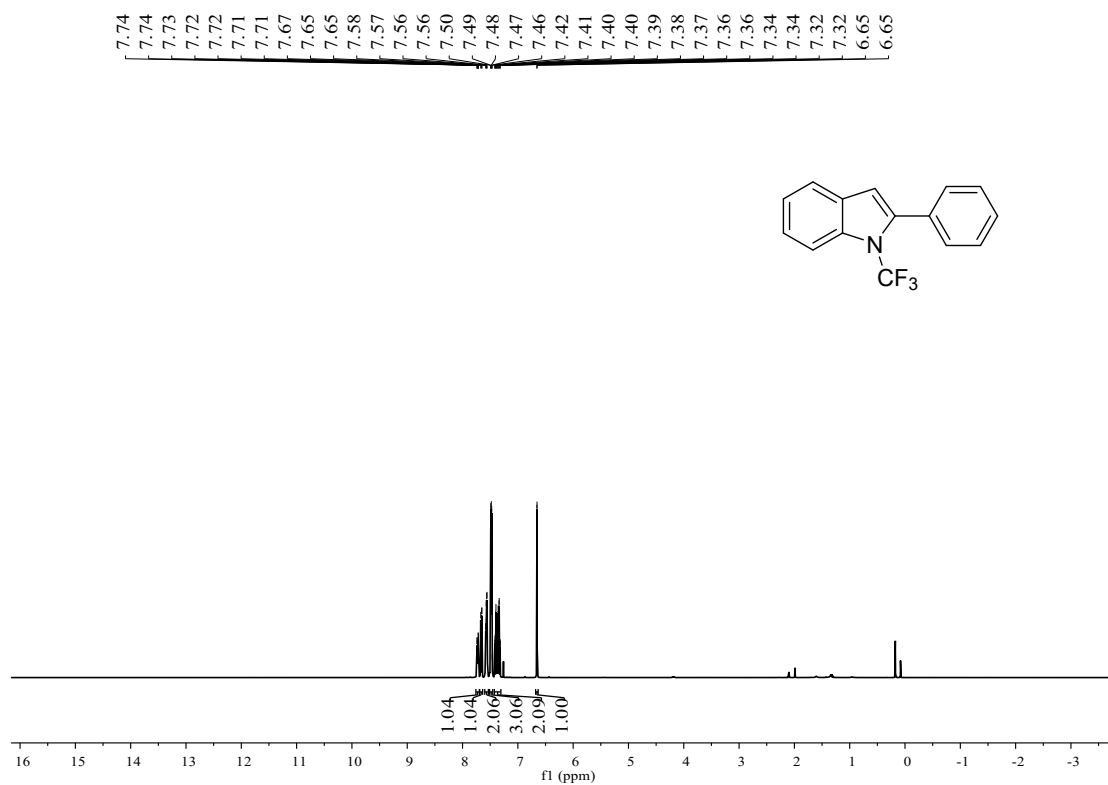

$^{19}\text{F}$  NMR Spectrum of **3aa** (376 MHz,  $\text{CDCl}_3$ )

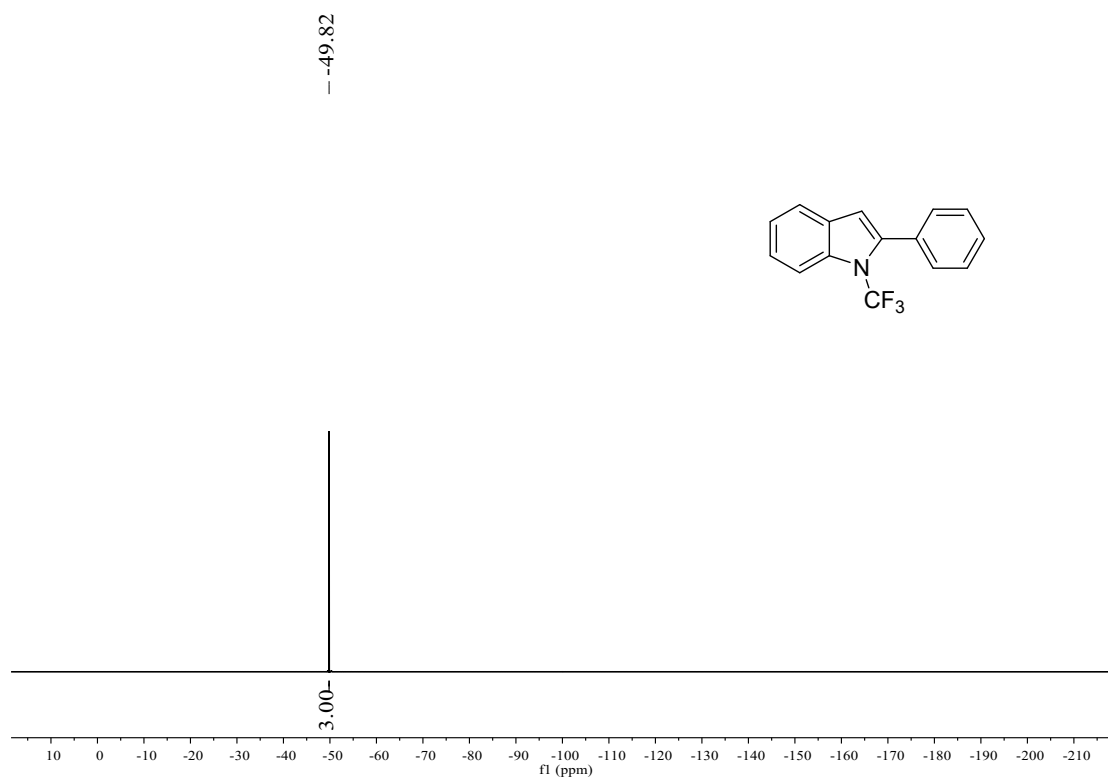

<sup>13</sup>C NMR Spectrum of **3aa** (101 MHz, CDCl<sub>3</sub>)

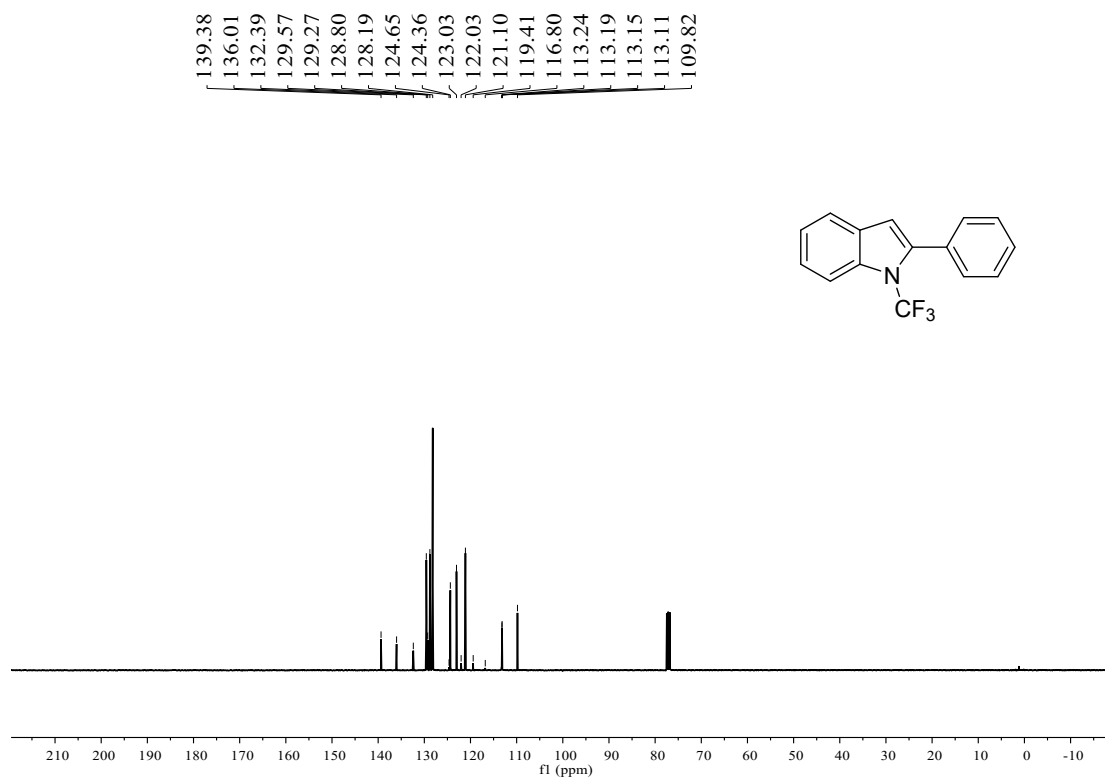

<sup>1</sup>H NMR Spectrum of **3ab** (400 MHz, CDCl<sub>3</sub>)

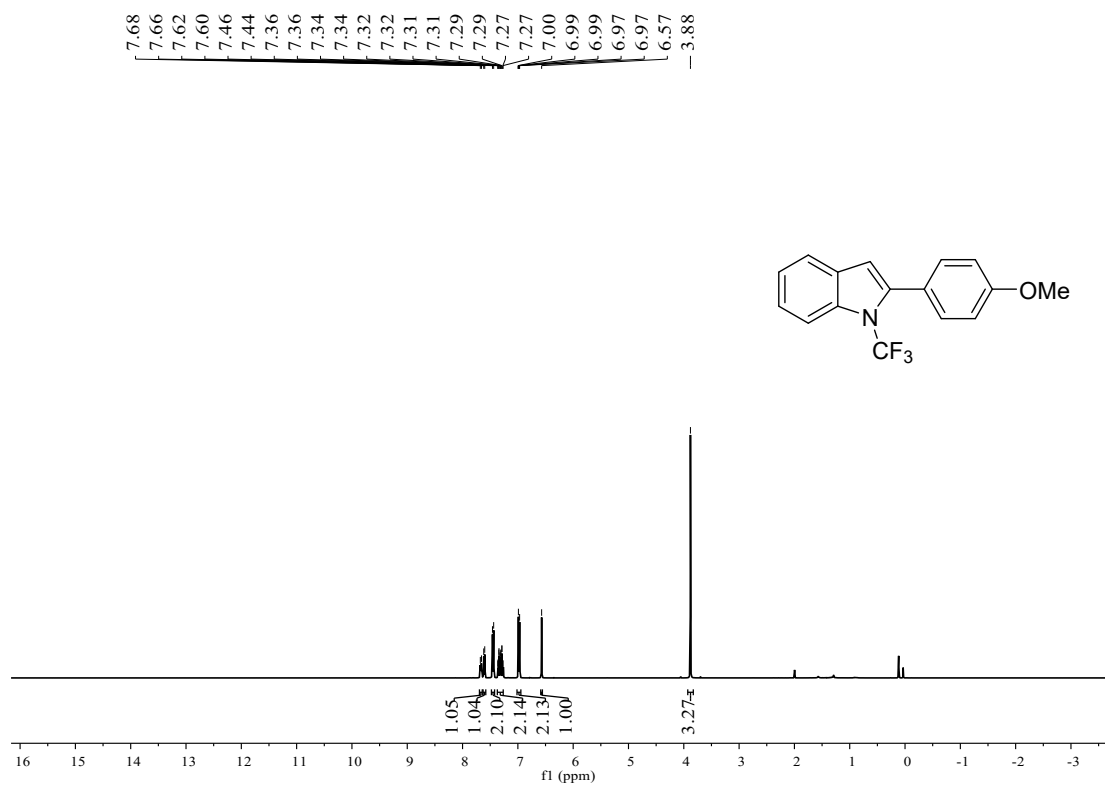

<sup>19</sup>F NMR Spectrum of **3ab** (376 MHz, CDCl<sub>3</sub>)

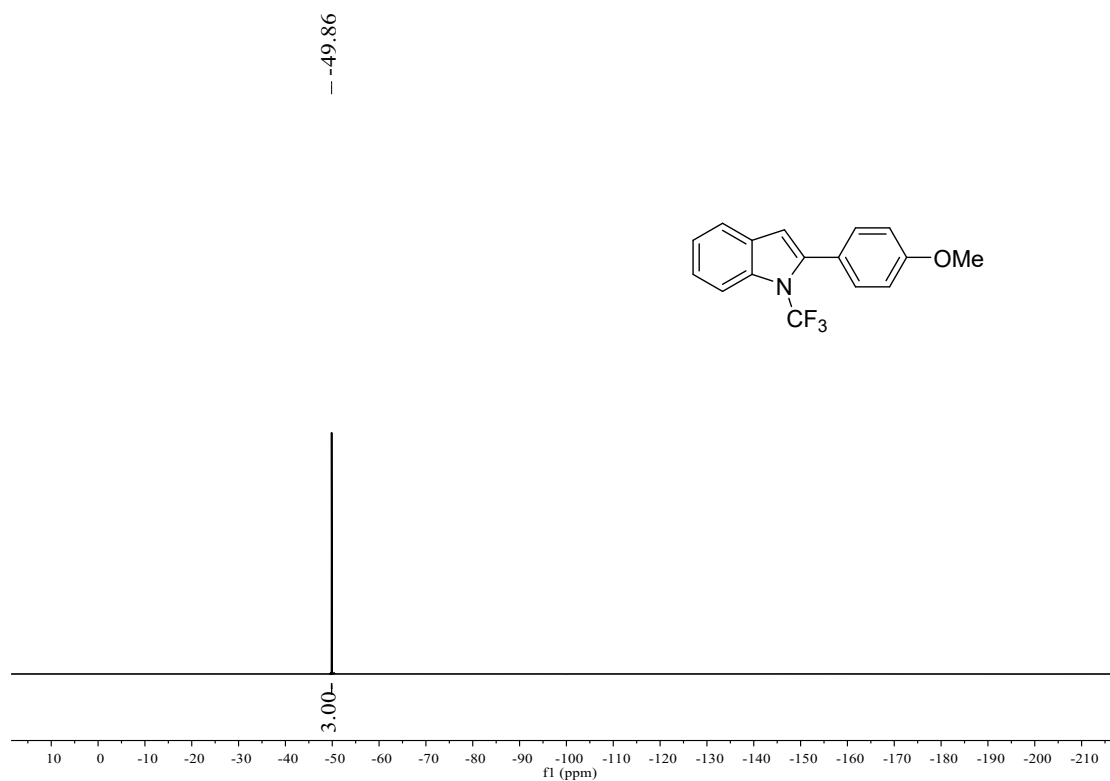

<sup>13</sup>C NMR Spectrum of **3ab** (101 MHz, CDCl<sub>3</sub>)

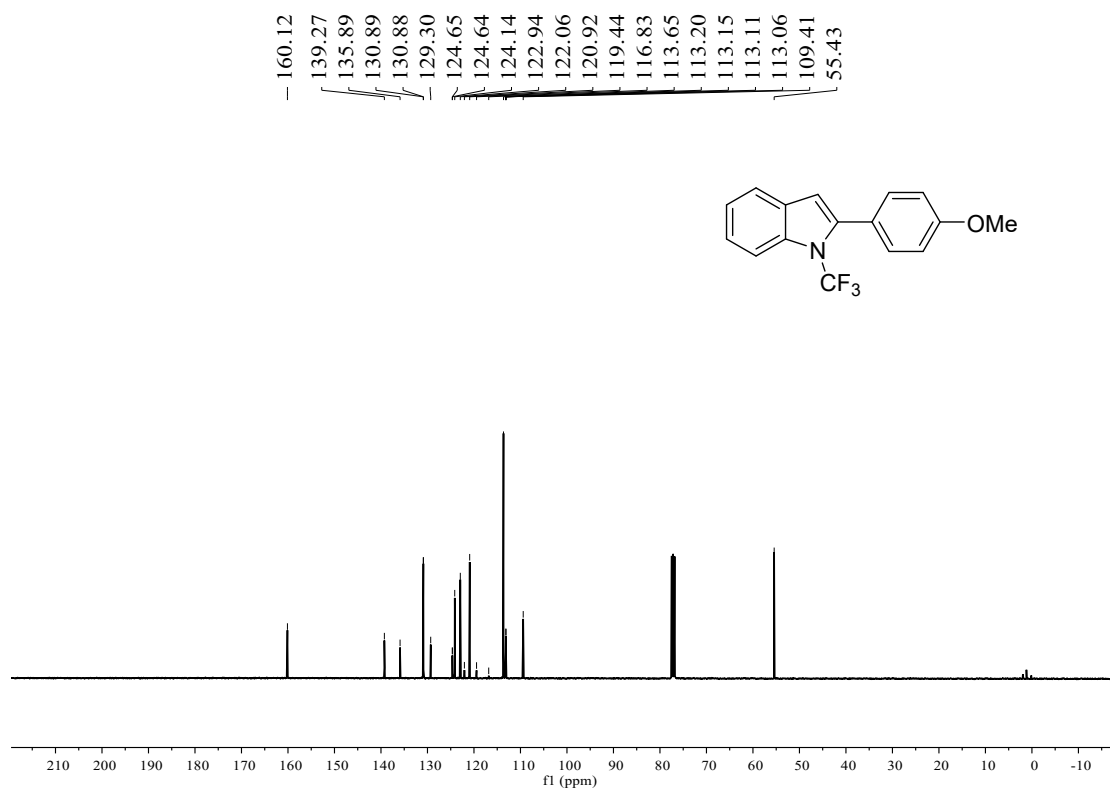

<sup>1</sup>H NMR Spectrum of **3ac** (400 MHz, CDCl<sub>3</sub>)

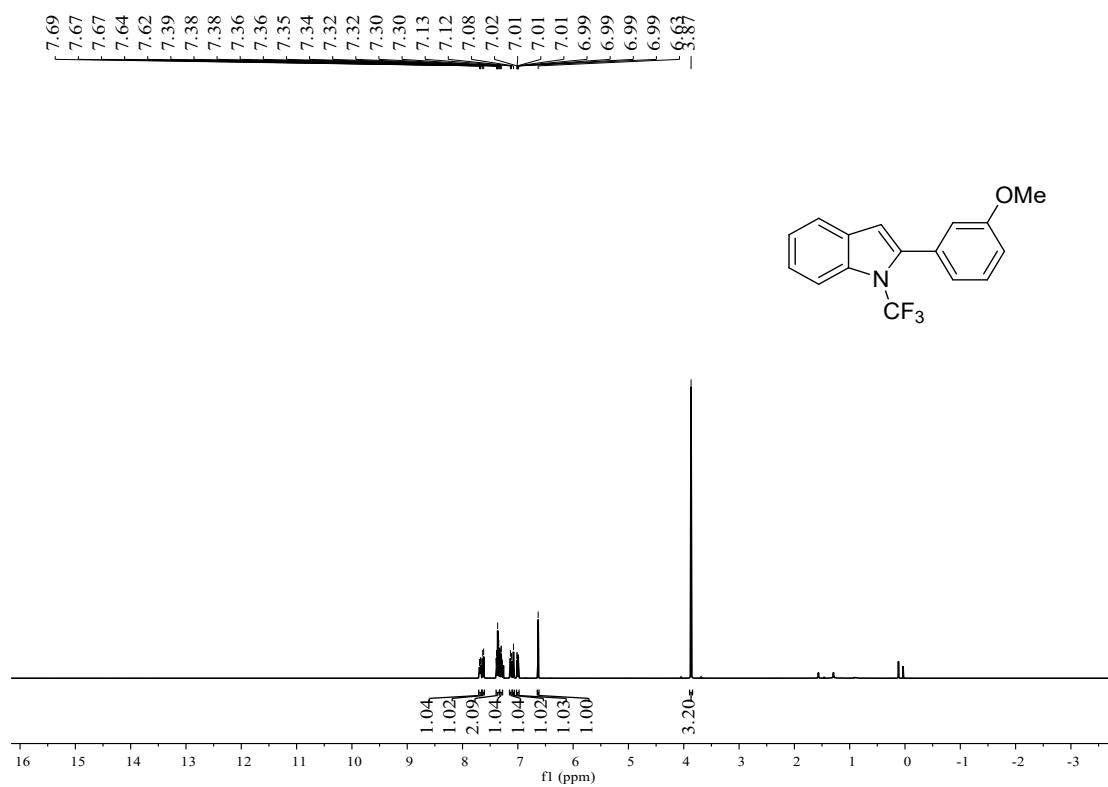

<sup>19</sup>F NMR Spectrum of **3ac** (376 MHz, CDCl<sub>3</sub>)

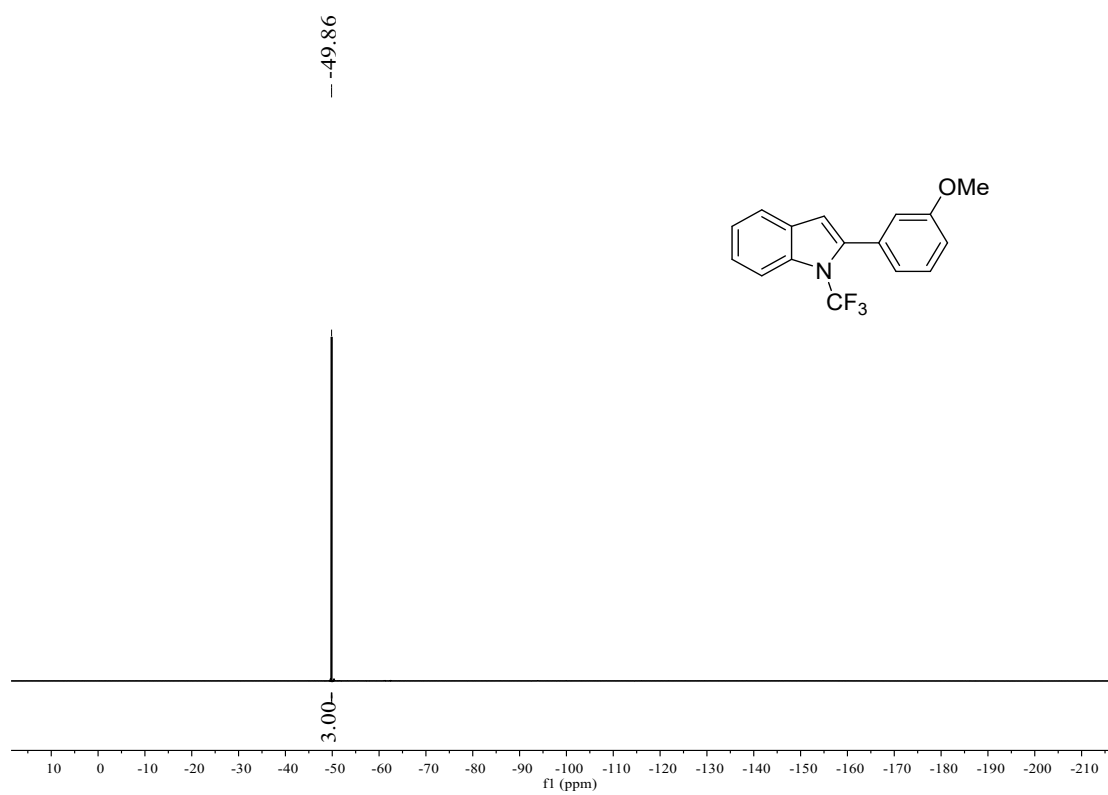

<sup>13</sup>C NMR Spectrum of **3ac** (101 MHz, CDCl<sub>3</sub>)

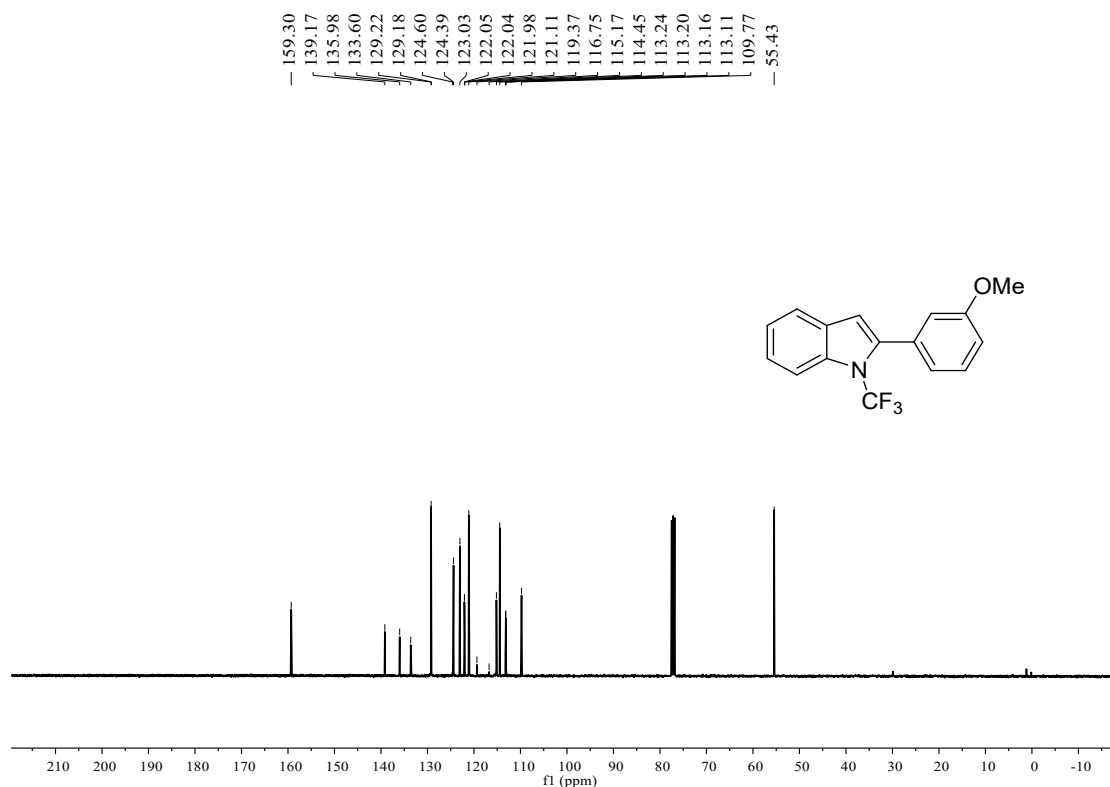

<sup>1</sup>H NMR Spectrum of **3ad** (400 MHz, CDCl<sub>3</sub>)

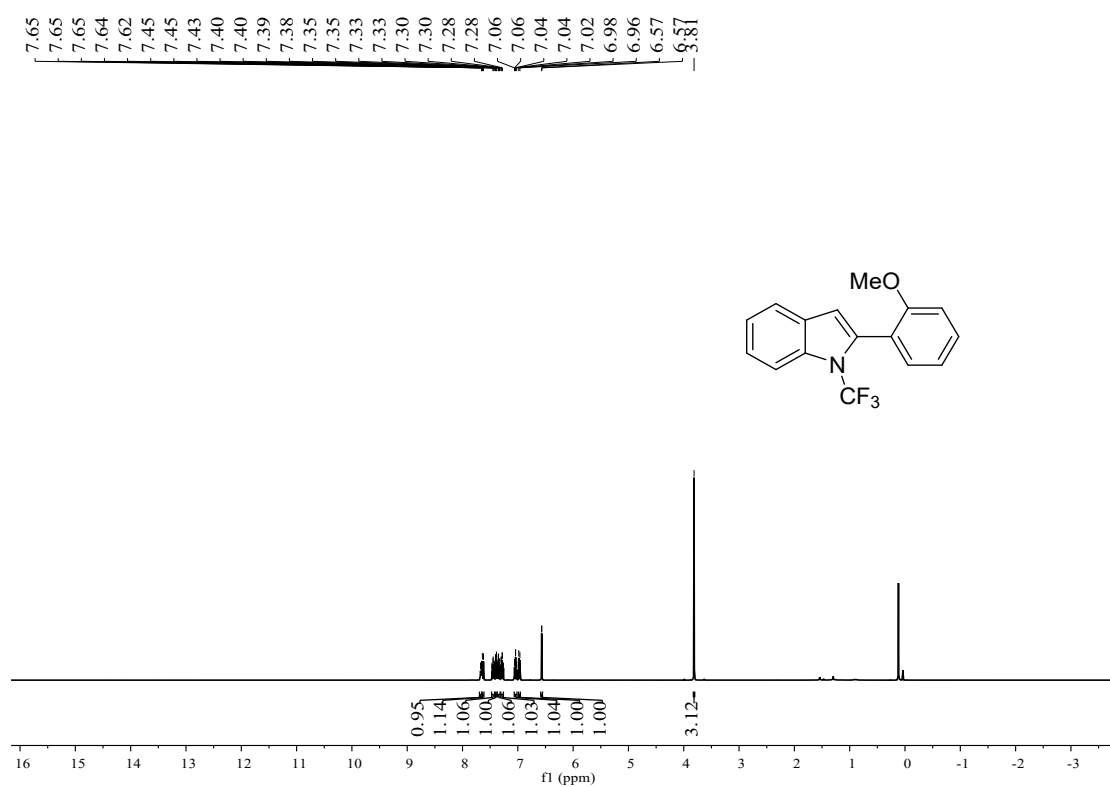

<sup>19</sup>F NMR Spectrum of **3ad** (376 MHz, CDCl<sub>3</sub>)

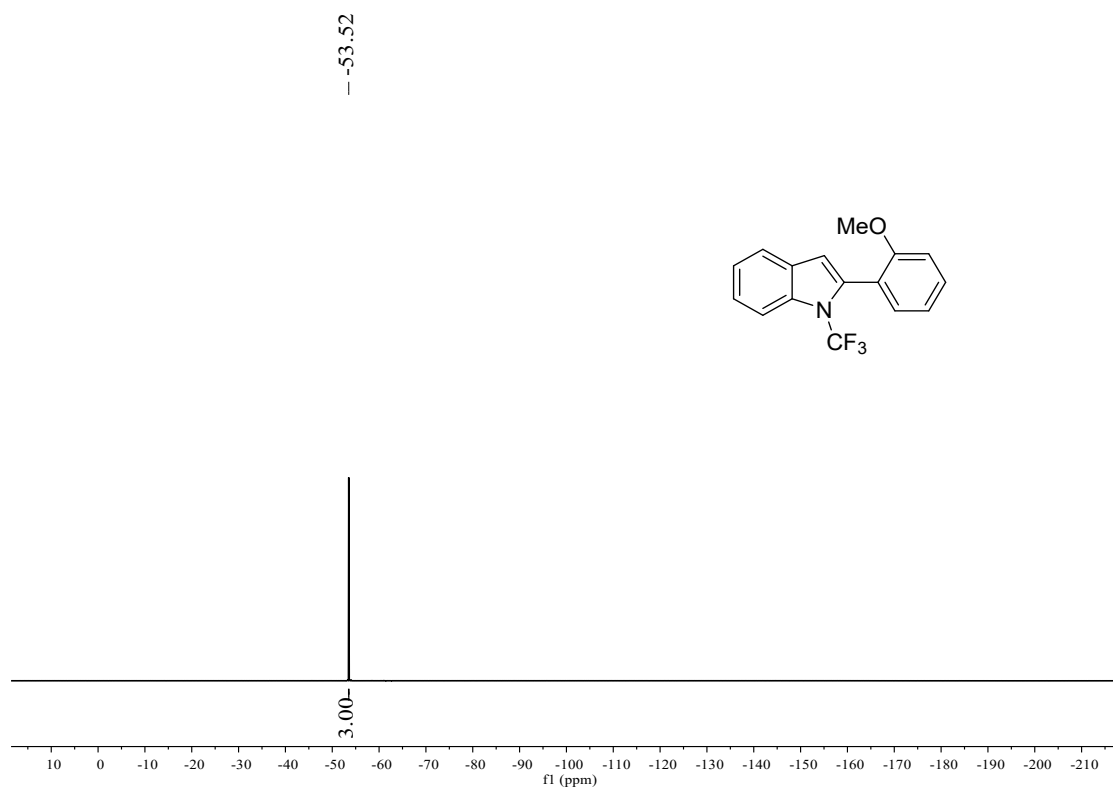

<sup>13</sup>C NMR Spectrum of **3ad** (101 MHz, CDCl<sub>3</sub>)

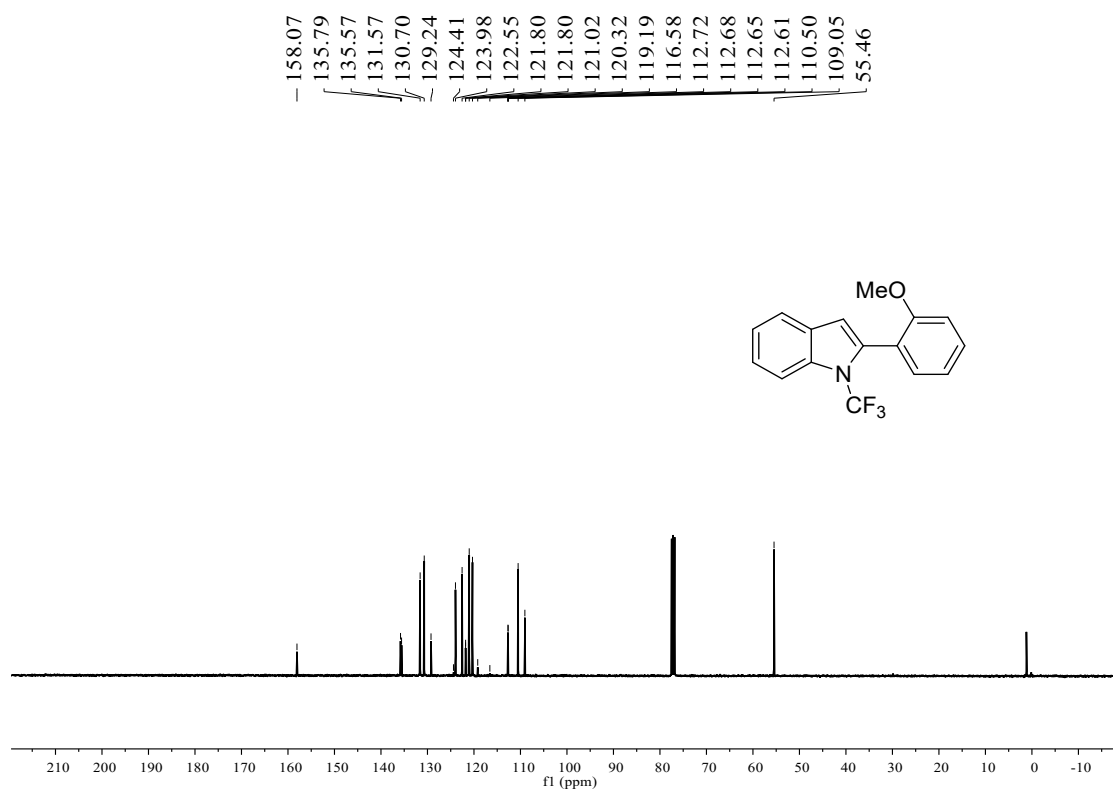

$^1\text{H}$  NMR Spectrum of **3ae** (400 MHz,  $\text{CDCl}_3$ )

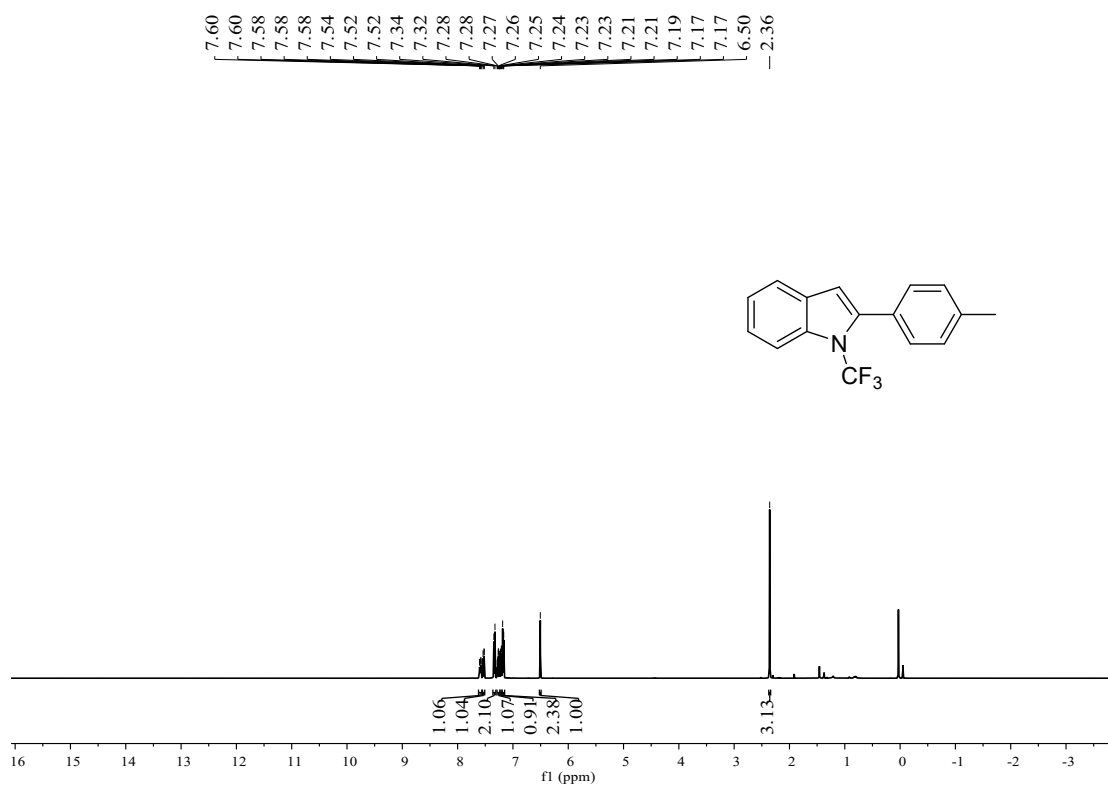

$^{19}\text{F}$  NMR Spectrum of **3ae** (376 MHz,  $\text{CDCl}_3$ )

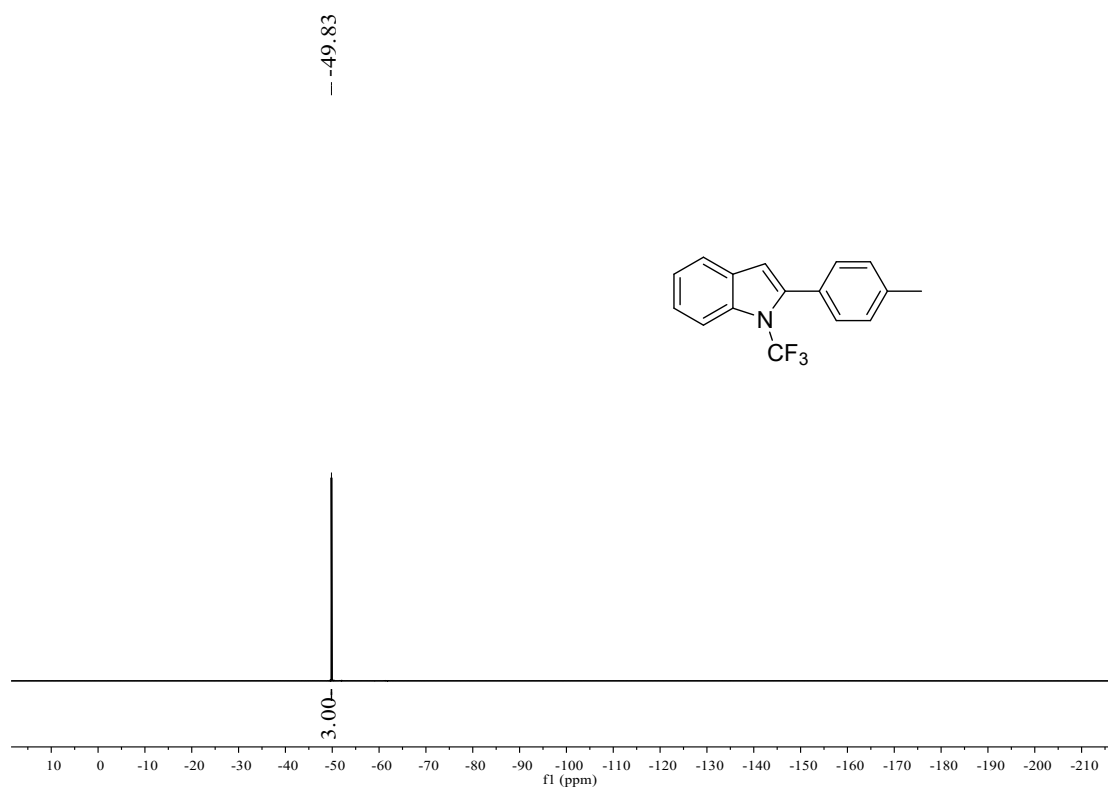



<sup>13</sup>C NMR Spectrum of **3ae** (101 MHz, CDCl<sub>3</sub>)

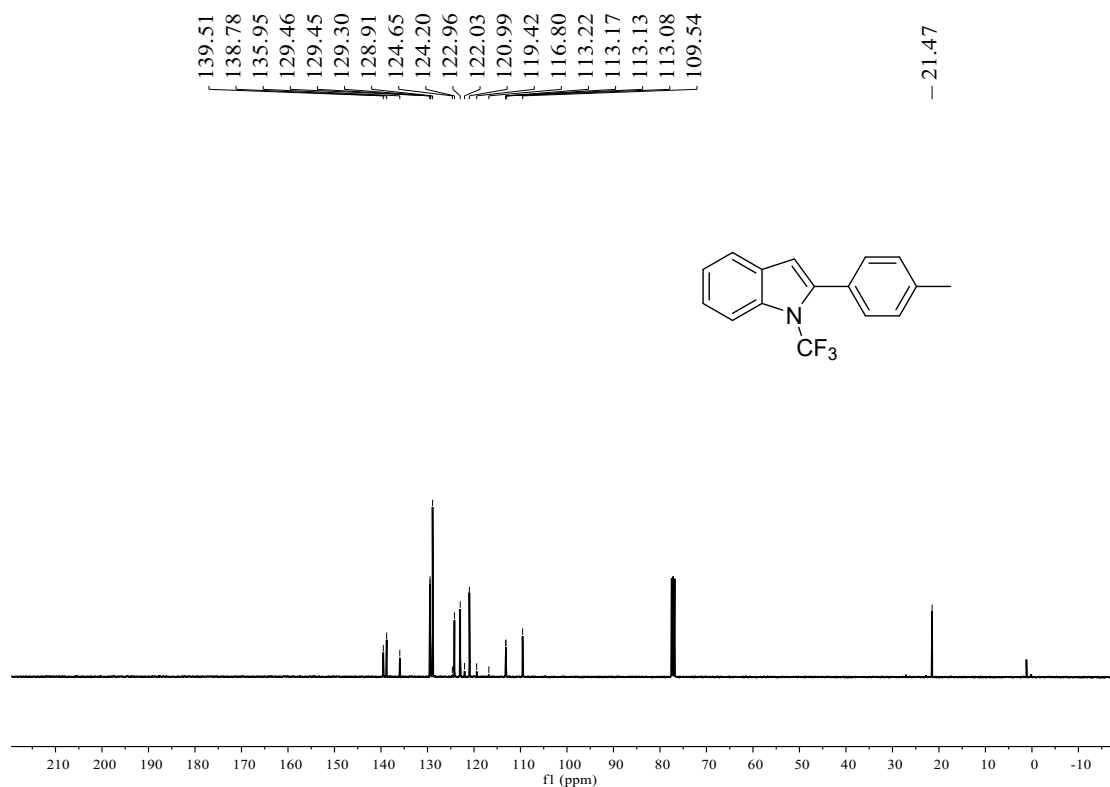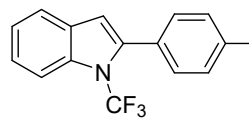

<sup>1</sup>H NMR Spectrum of **3af** (400 MHz, CDCl<sub>3</sub>)

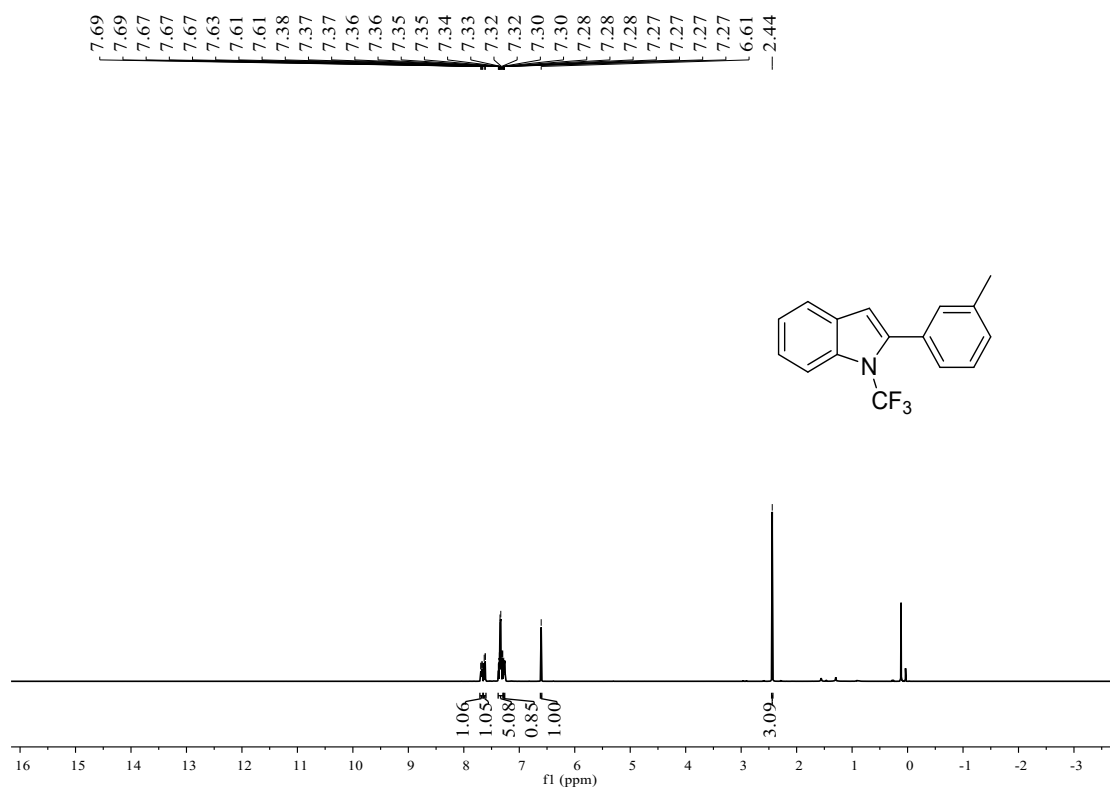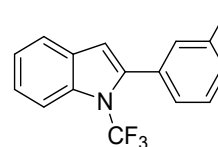

<sup>19</sup>F NMR Spectrum of **3af** (376 MHz, CDCl<sub>3</sub>)

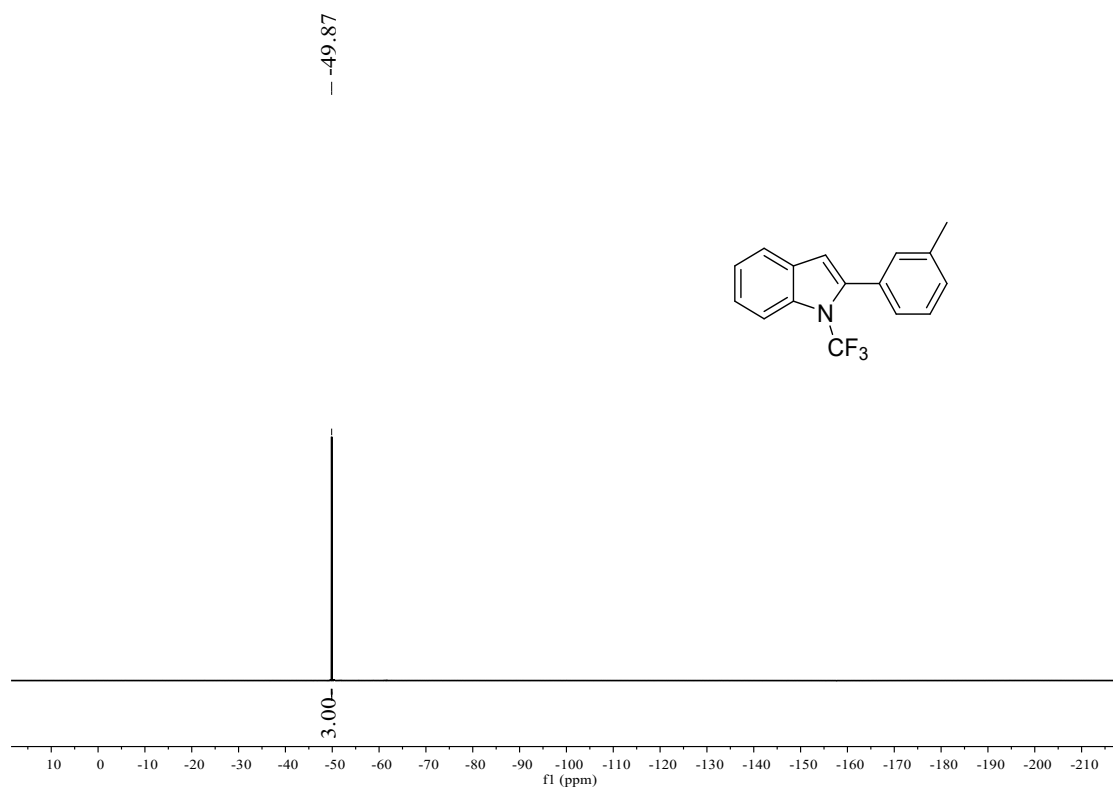

<sup>13</sup>C NMR Spectrum of **3af** (101 MHz, CDCl<sub>3</sub>)

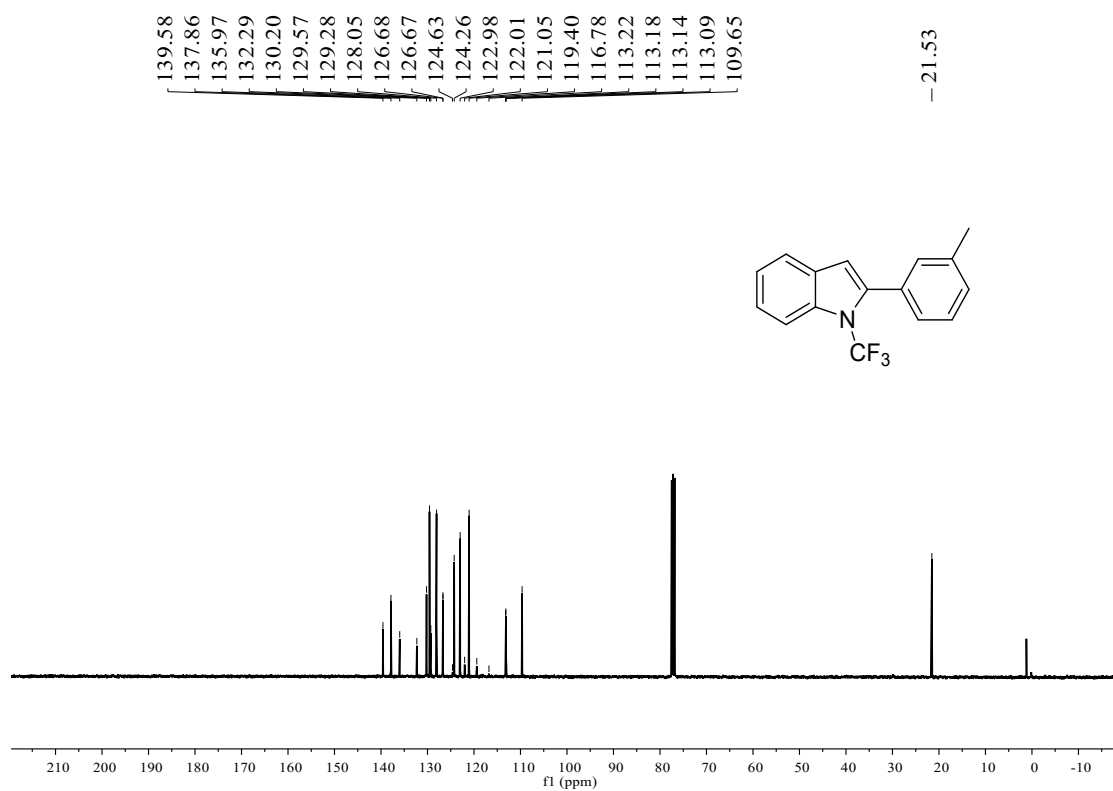

$^1\text{H}$  NMR Spectrum of **3ag** (400 MHz,  $\text{CDCl}_3$ )

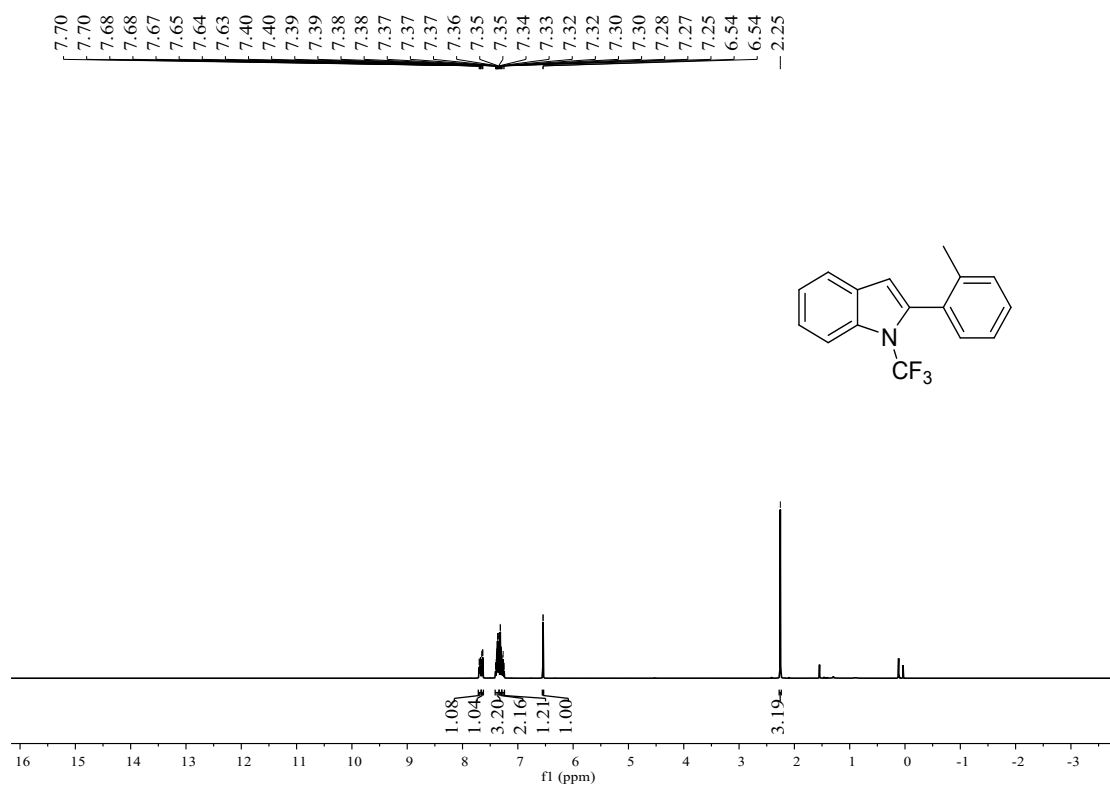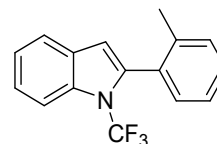

$^{19}\text{F}$  NMR Spectrum of **3ag** (376 MHz,  $\text{CDCl}_3$ )

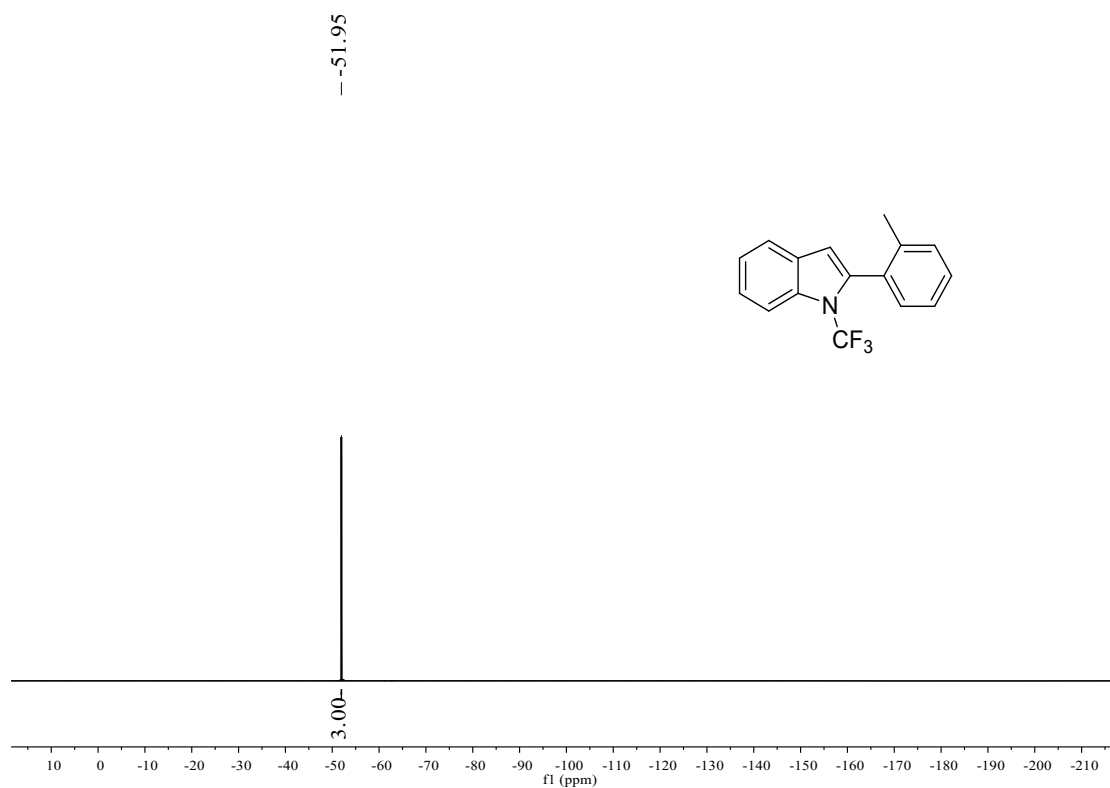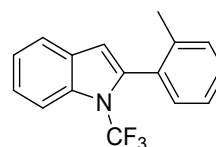

<sup>13</sup>C NMR Spectrum of **3ag** (101 MHz, CDCl<sub>3</sub>)

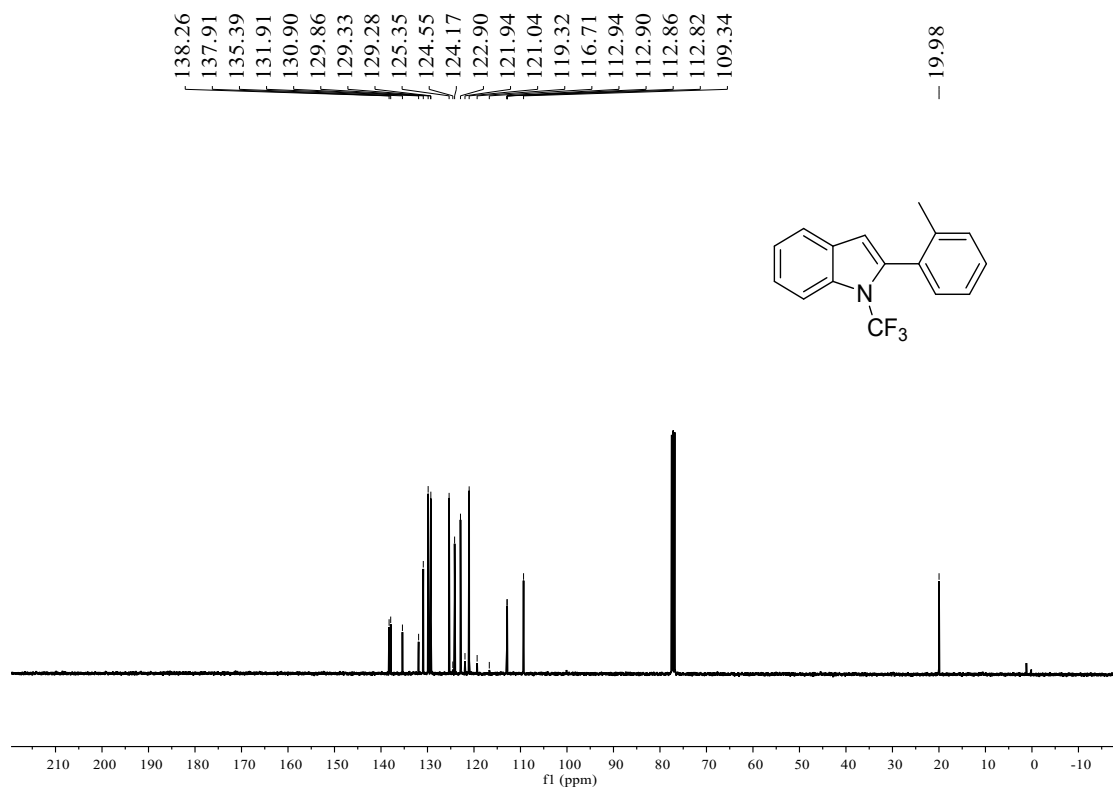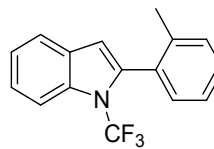

<sup>1</sup>H NMR Spectrum of **3ah** (400 MHz, CDCl<sub>3</sub>)

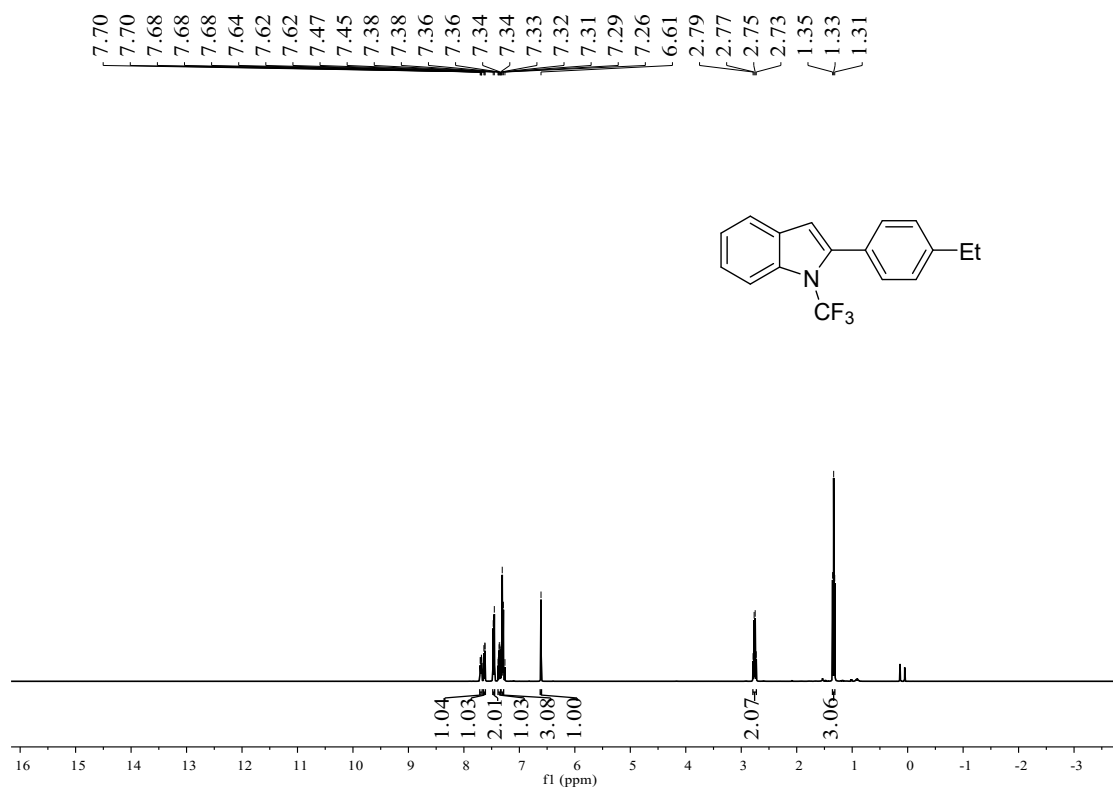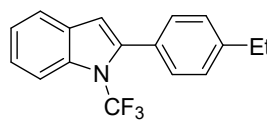

<sup>19</sup>F NMR Spectrum of **3ah** (376 MHz, CDCl<sub>3</sub>)

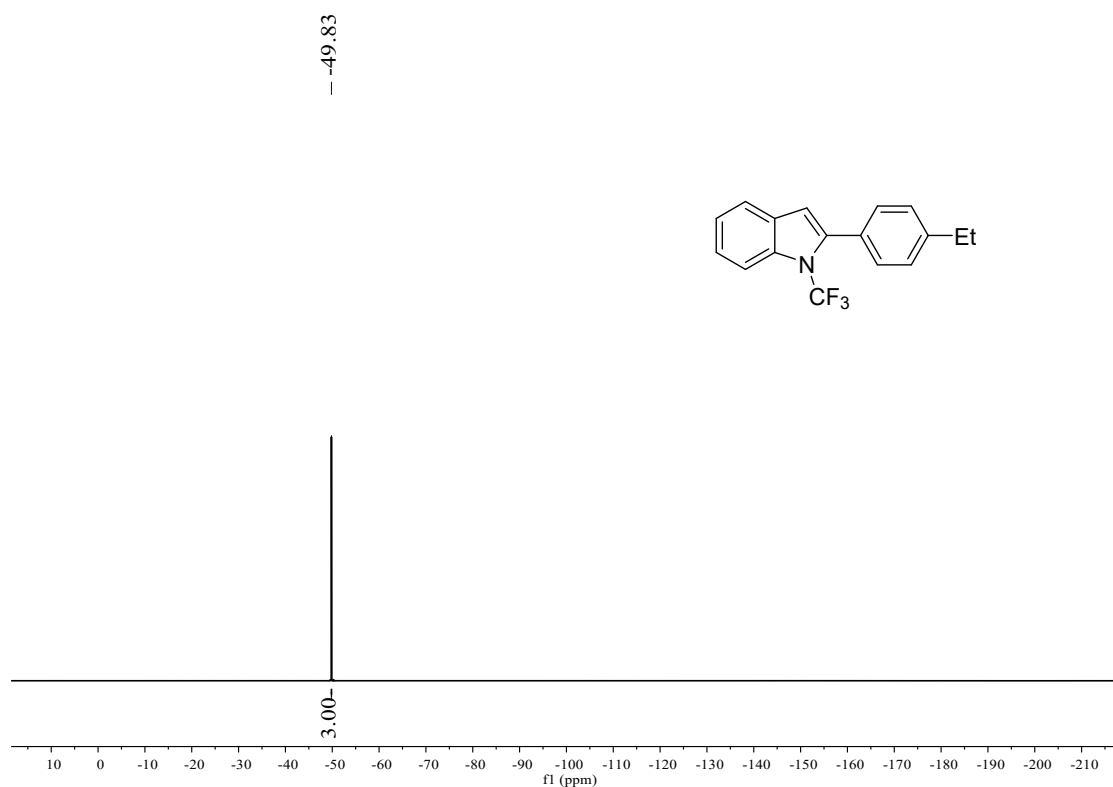

<sup>13</sup>C NMR Spectrum of **3ah** (101 MHz, CDCl<sub>3</sub>)

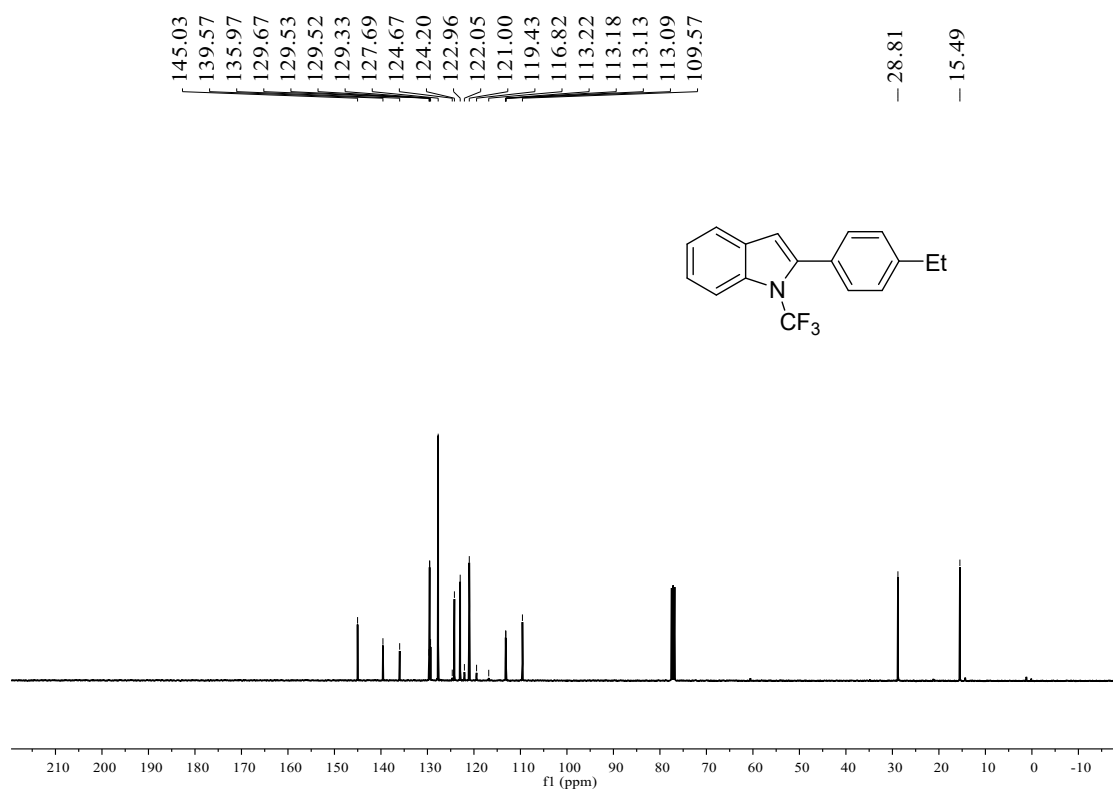

<sup>1</sup>H NMR Spectrum of **3ai** (400 MHz, CDCl<sub>3</sub>)

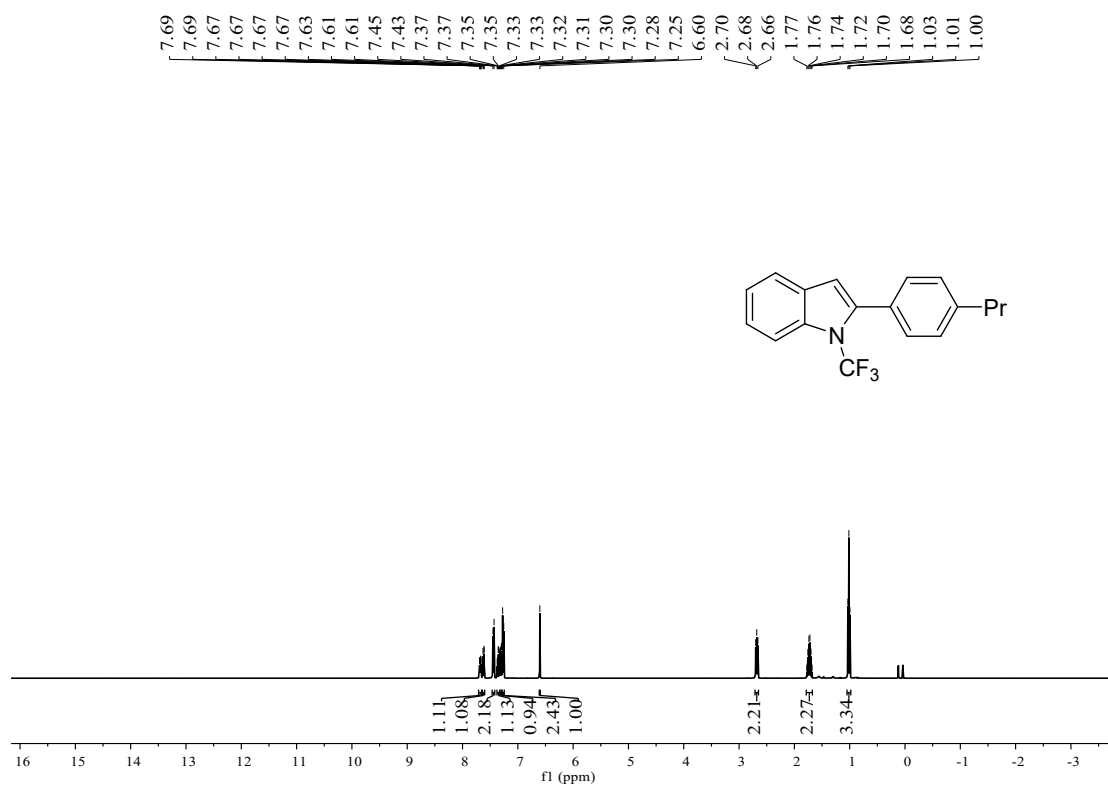

<sup>19</sup>F NMR Spectrum of **3ai** (376 MHz, CDCl<sub>3</sub>)

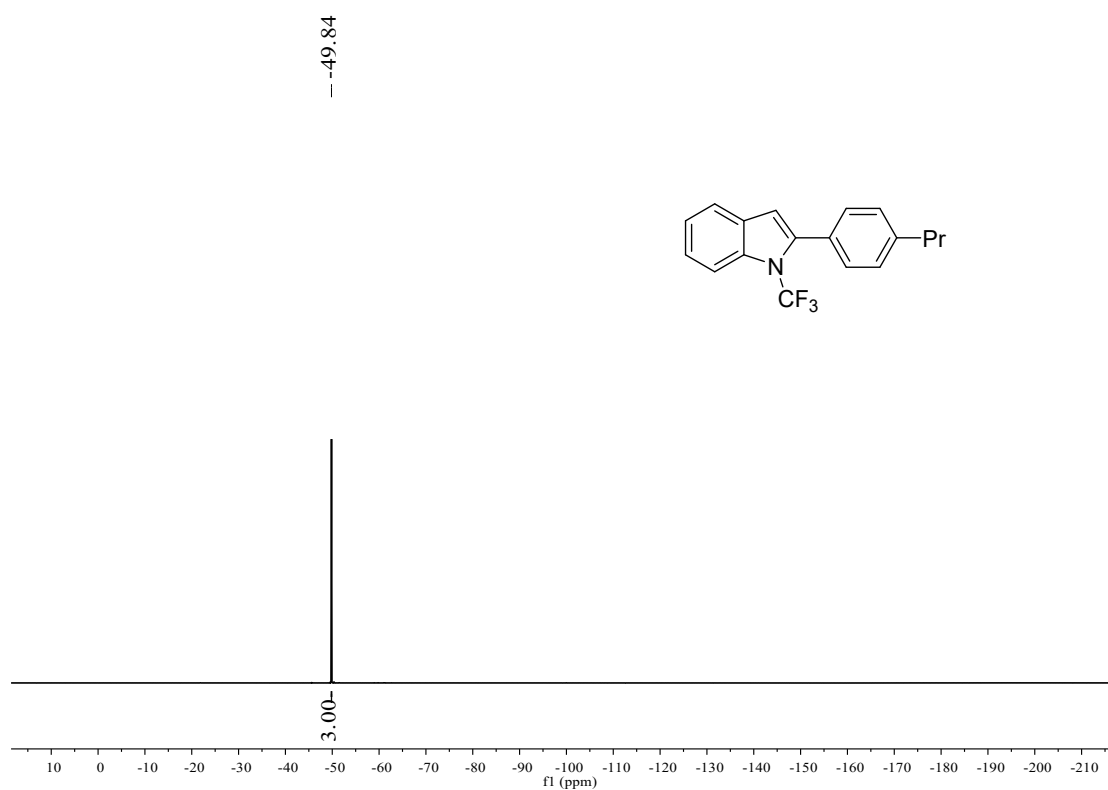

<sup>13</sup>C NMR Spectrum of **3ai** (101 MHz, CDCl<sub>3</sub>)

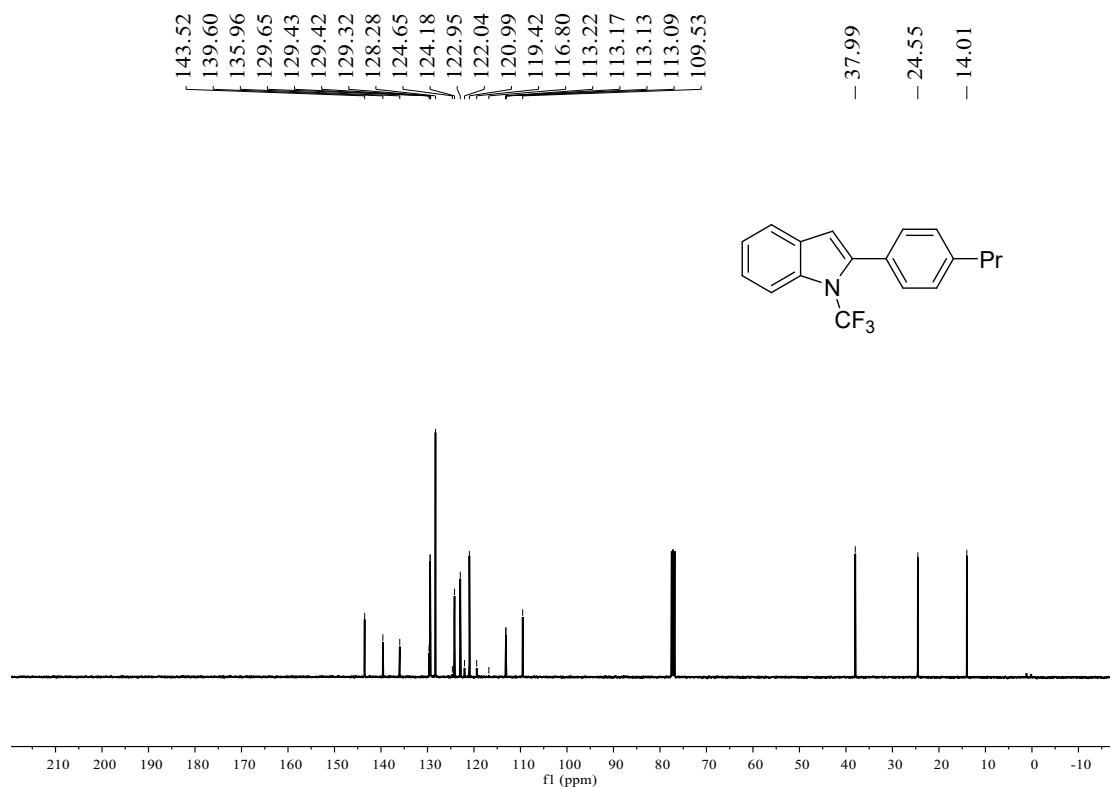

<sup>1</sup>H NMR Spectrum of **3aj** (400 MHz, CDCl<sub>3</sub>)

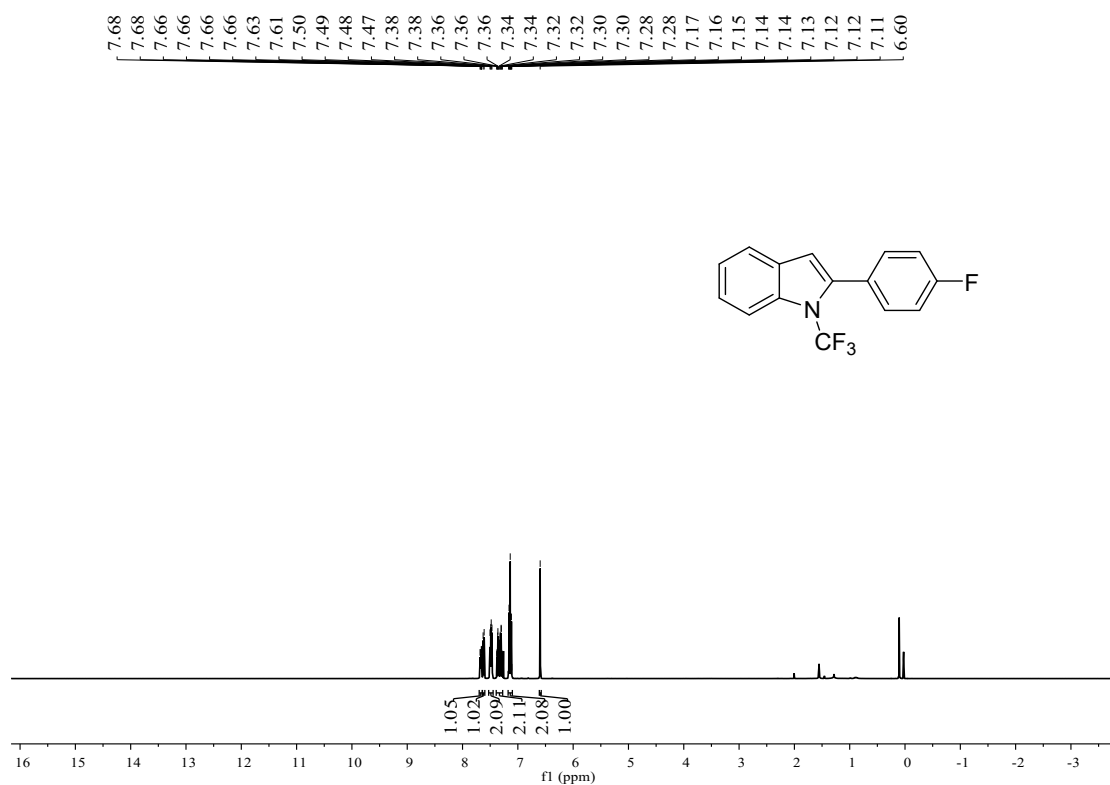

<sup>19</sup>F NMR Spectrum of **3aj** (376 MHz, CDCl<sub>3</sub>)

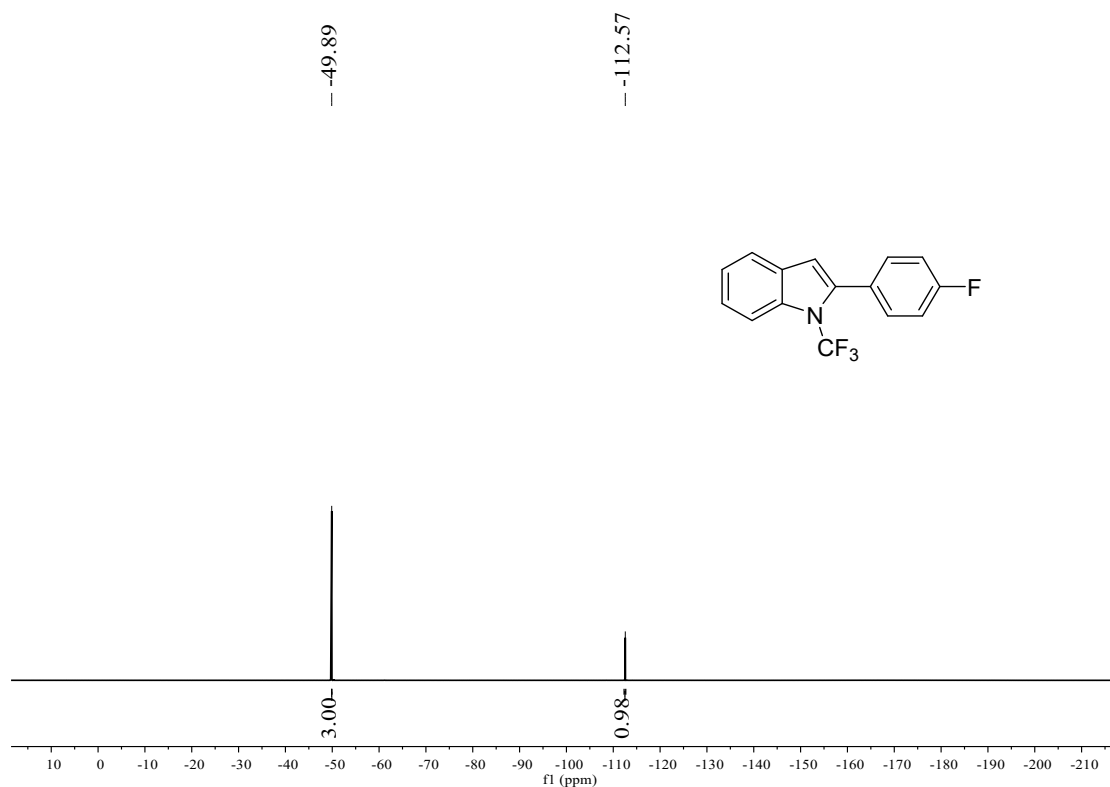

<sup>13</sup>C NMR Spectrum of **3aj** (101 MHz, CDCl<sub>3</sub>)

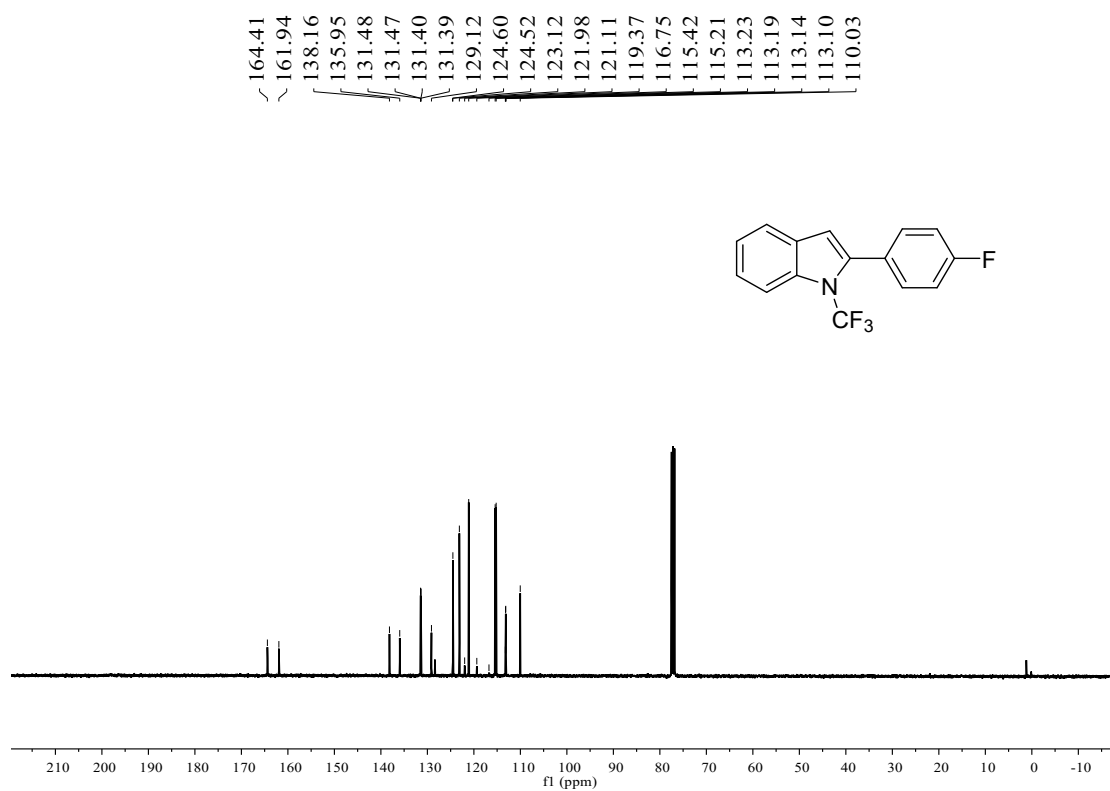



<sup>1</sup>H NMR Spectrum of **3ak** (400 MHz, CDCl<sub>3</sub>)

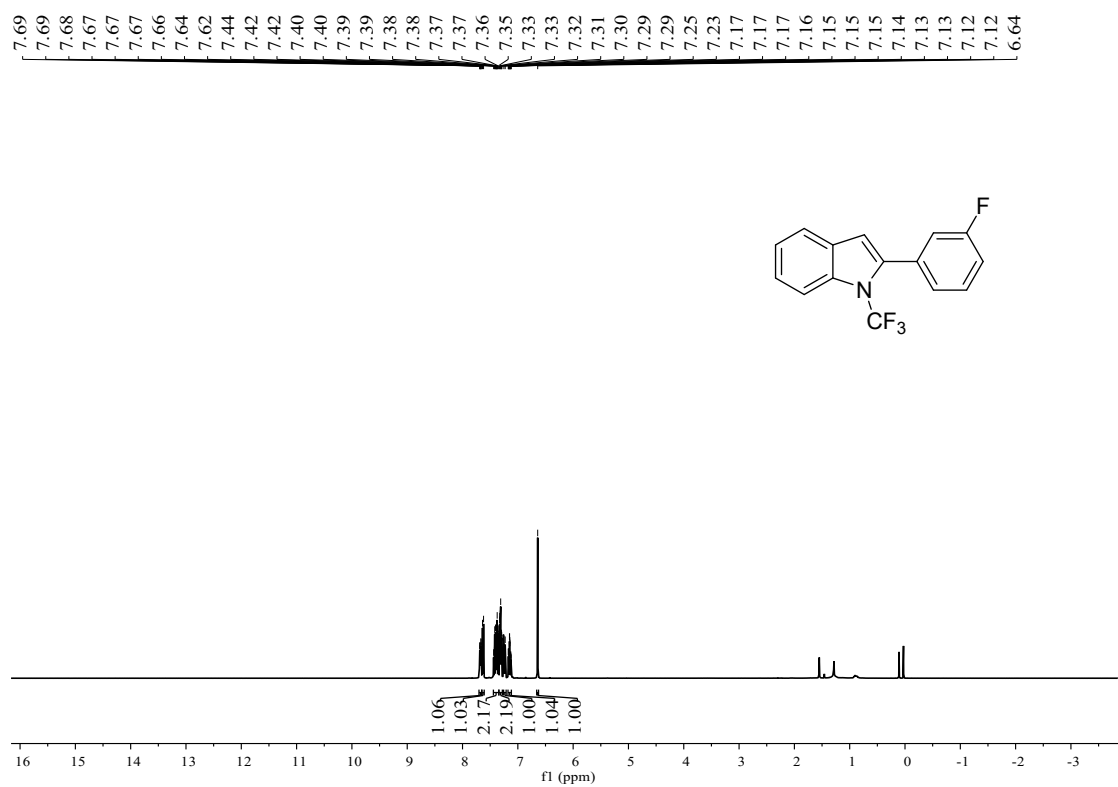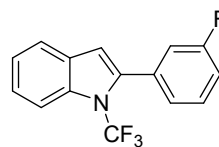

<sup>19</sup>F NMR Spectrum of **3ak** (376 MHz, CDCl<sub>3</sub>)

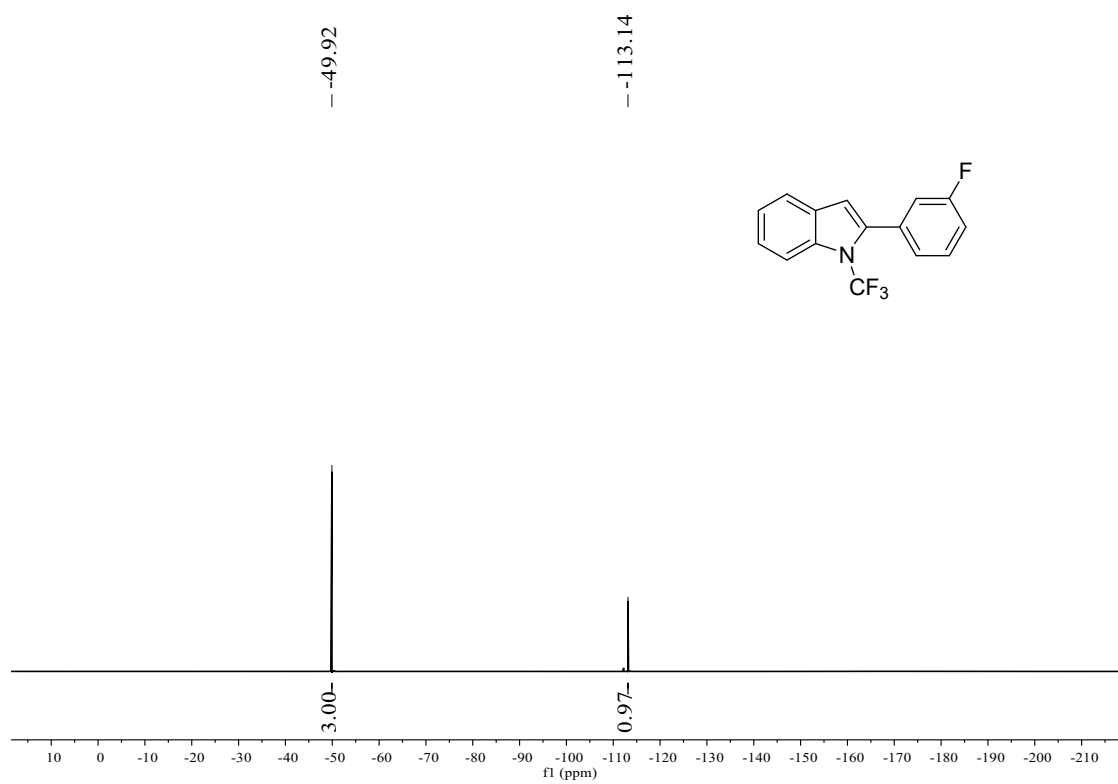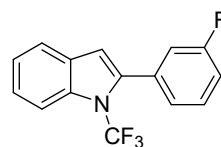

<sup>13</sup>C NMR Spectrum of **3ak** (101 MHz, CDCl<sub>3</sub>)

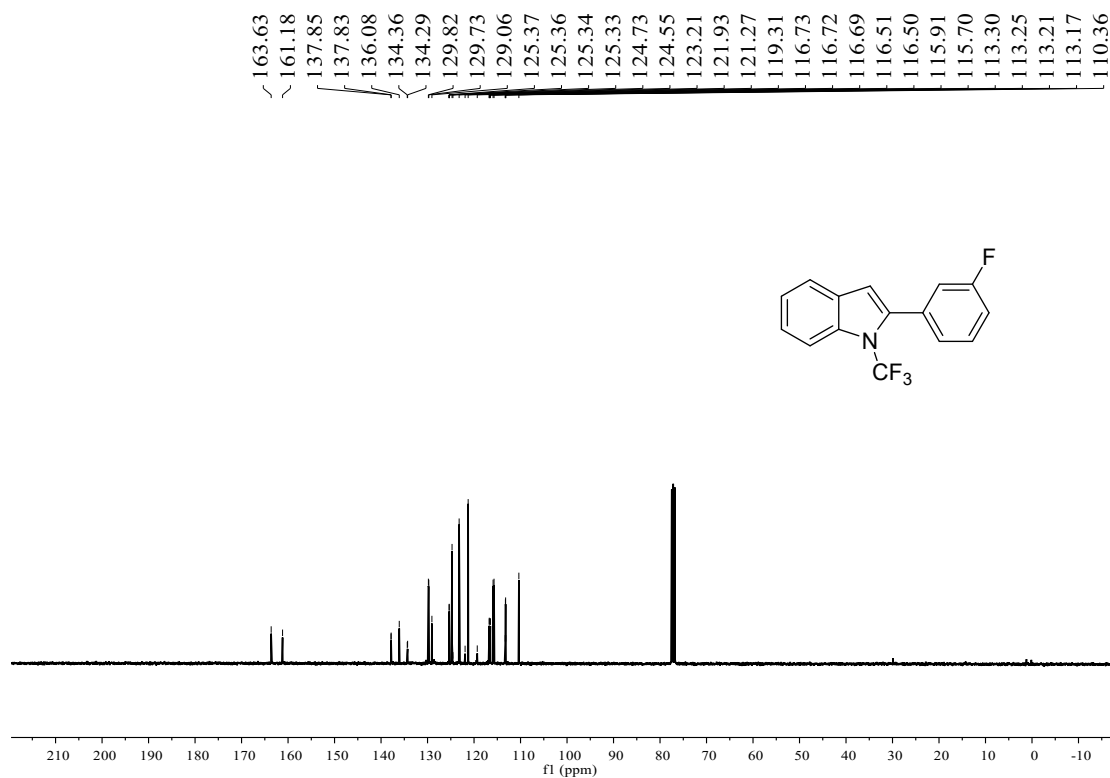

<sup>1</sup>H NMR Spectrum of **3al** (400 MHz, CDCl<sub>3</sub>)

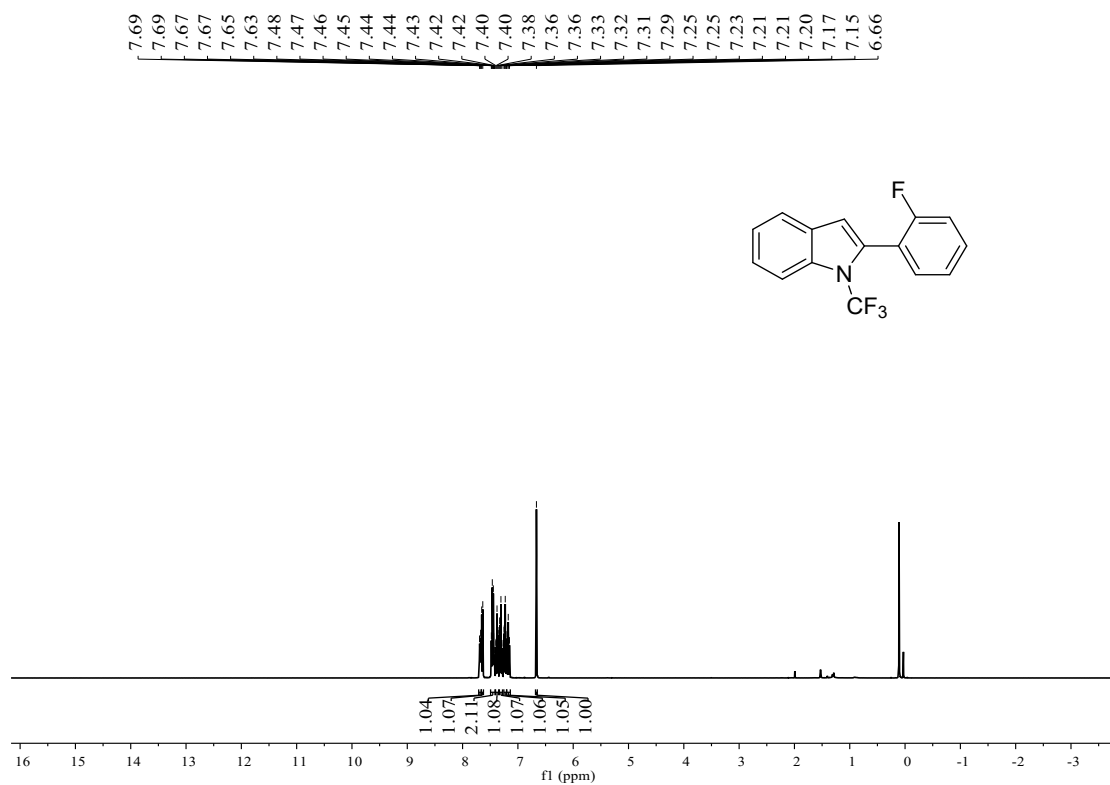

<sup>19</sup>F NMR Spectrum of **3al** (376 MHz, CDCl<sub>3</sub>)

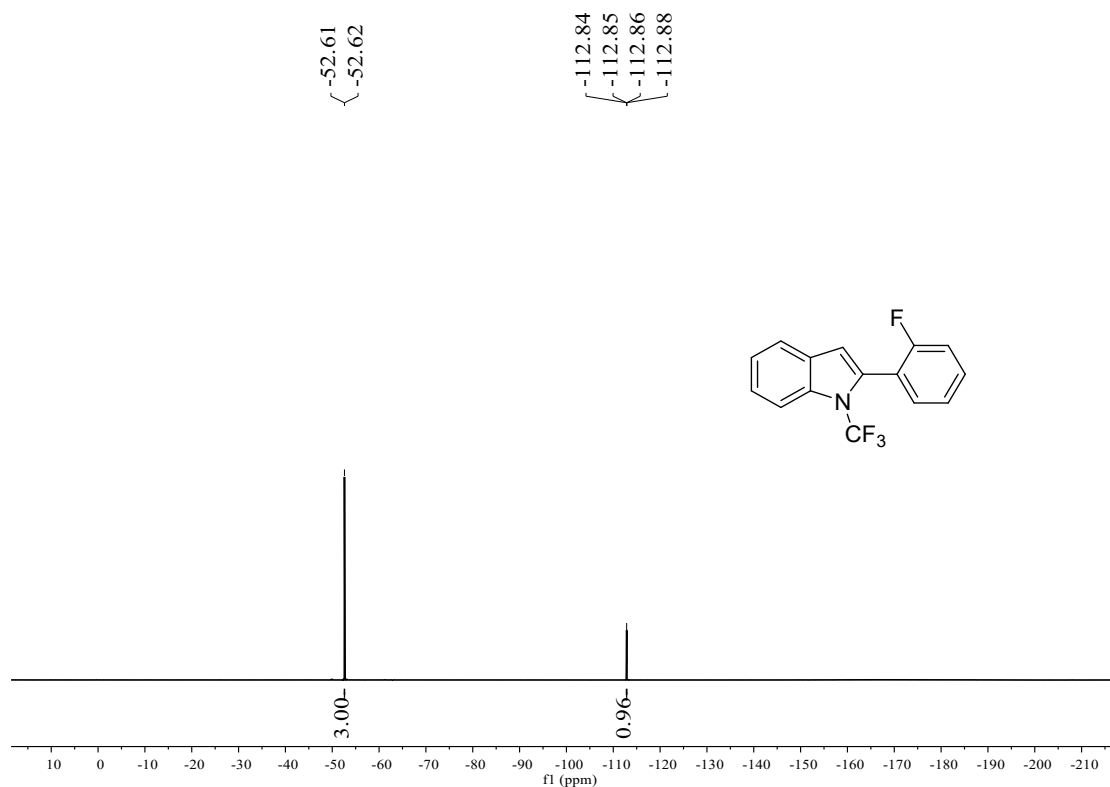

<sup>13</sup>C NMR Spectrum of **3al** (101 MHz, CDCl<sub>3</sub>)

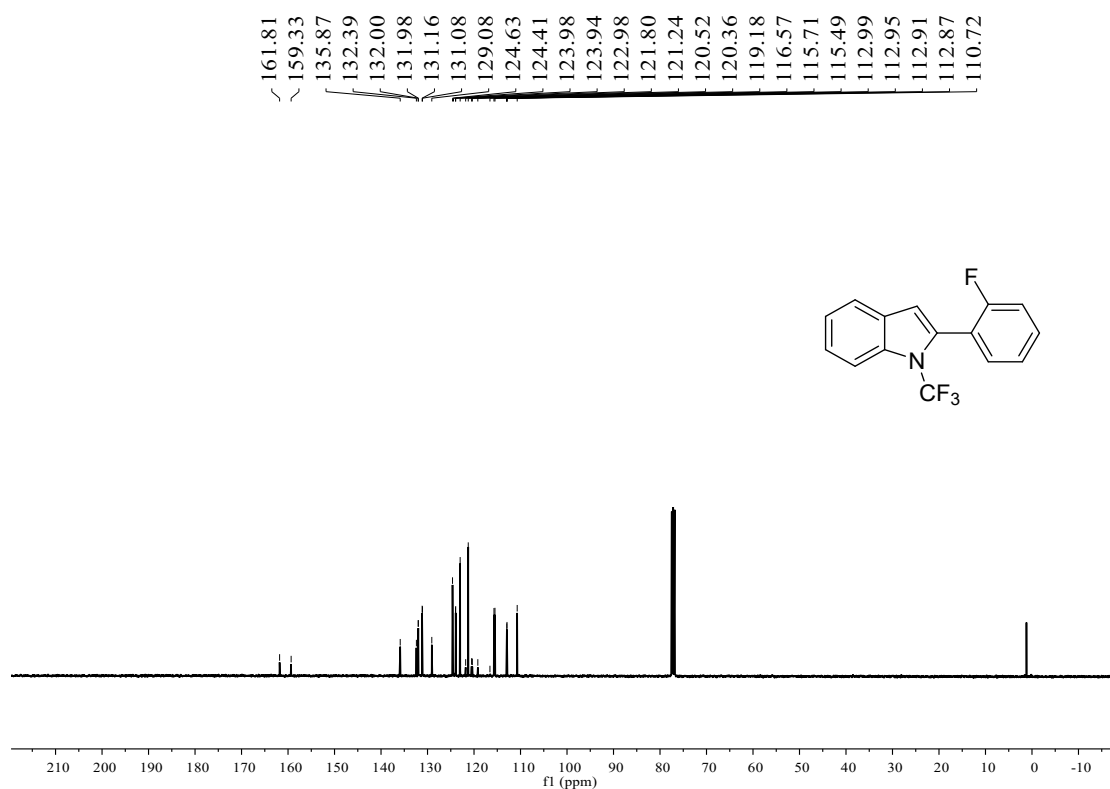

<sup>1</sup>H NMR Spectrum of **3am** (400 MHz, CDCl<sub>3</sub>)

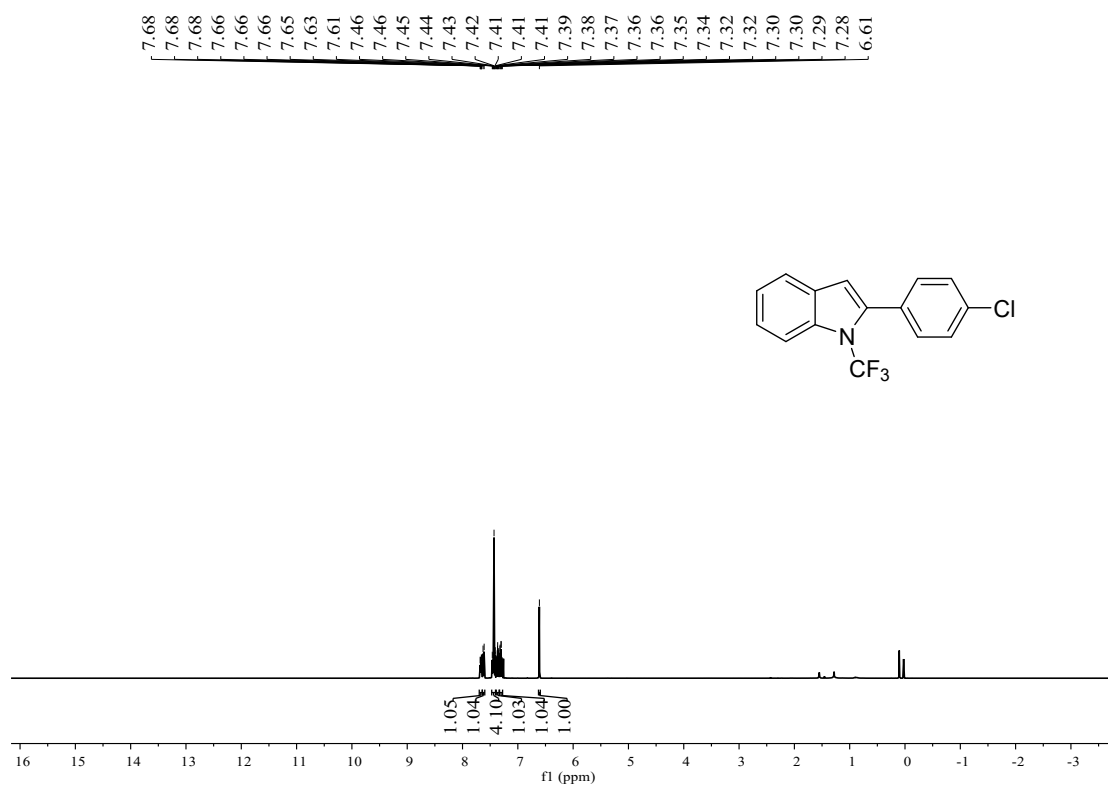

<sup>19</sup>F NMR Spectrum of **3am** (376 MHz, CDCl<sub>3</sub>)

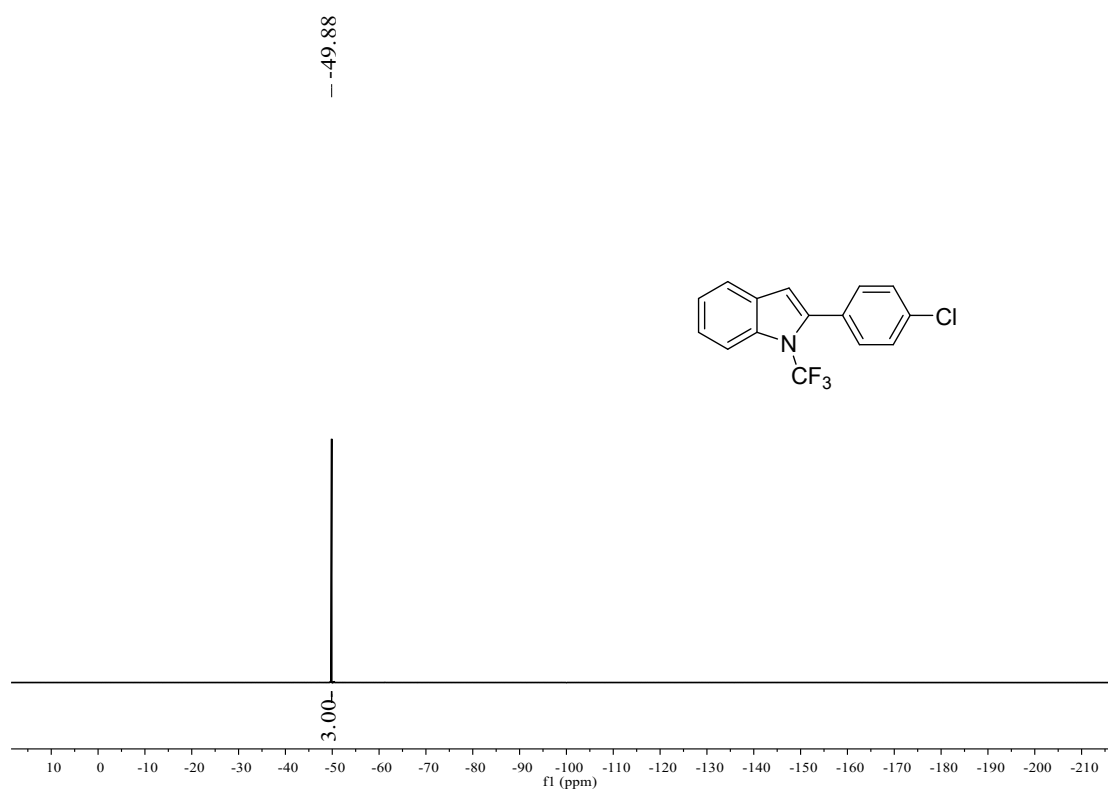

<sup>13</sup>C NMR Spectrum of **3am** (101 MHz, CDCl<sub>3</sub>)

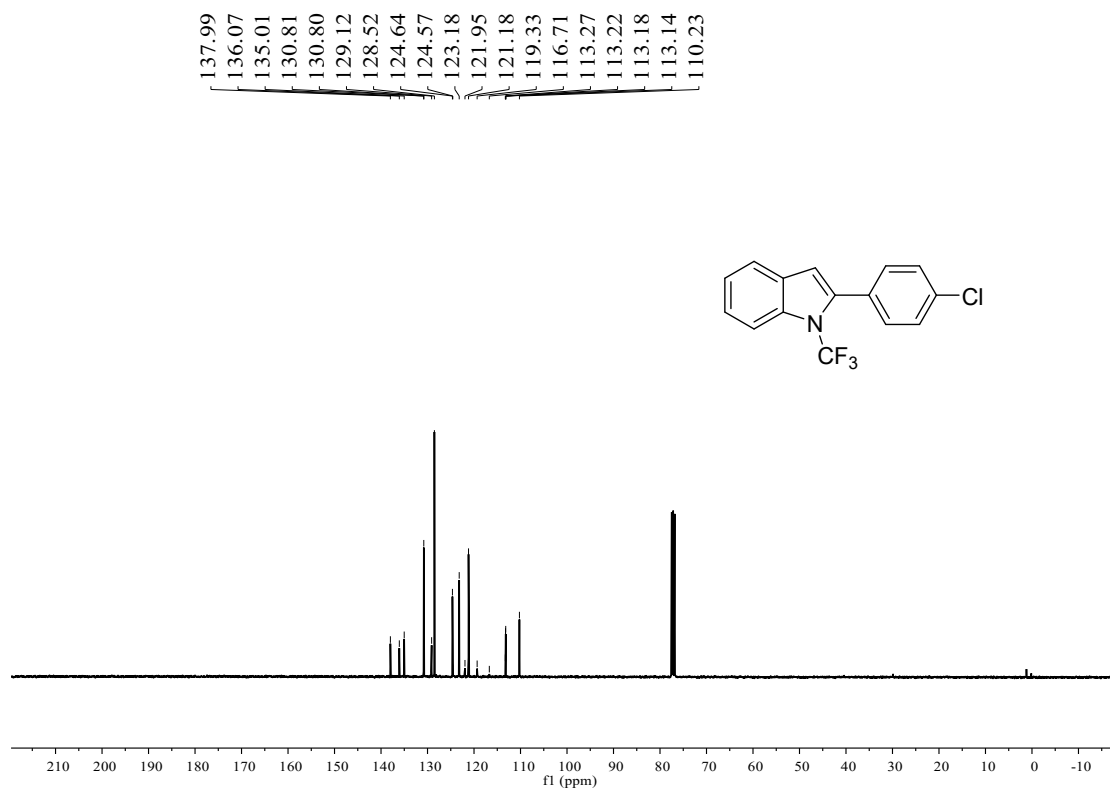

<sup>1</sup>H NMR Spectrum of **3am** (400 MHz, CDCl<sub>3</sub>)

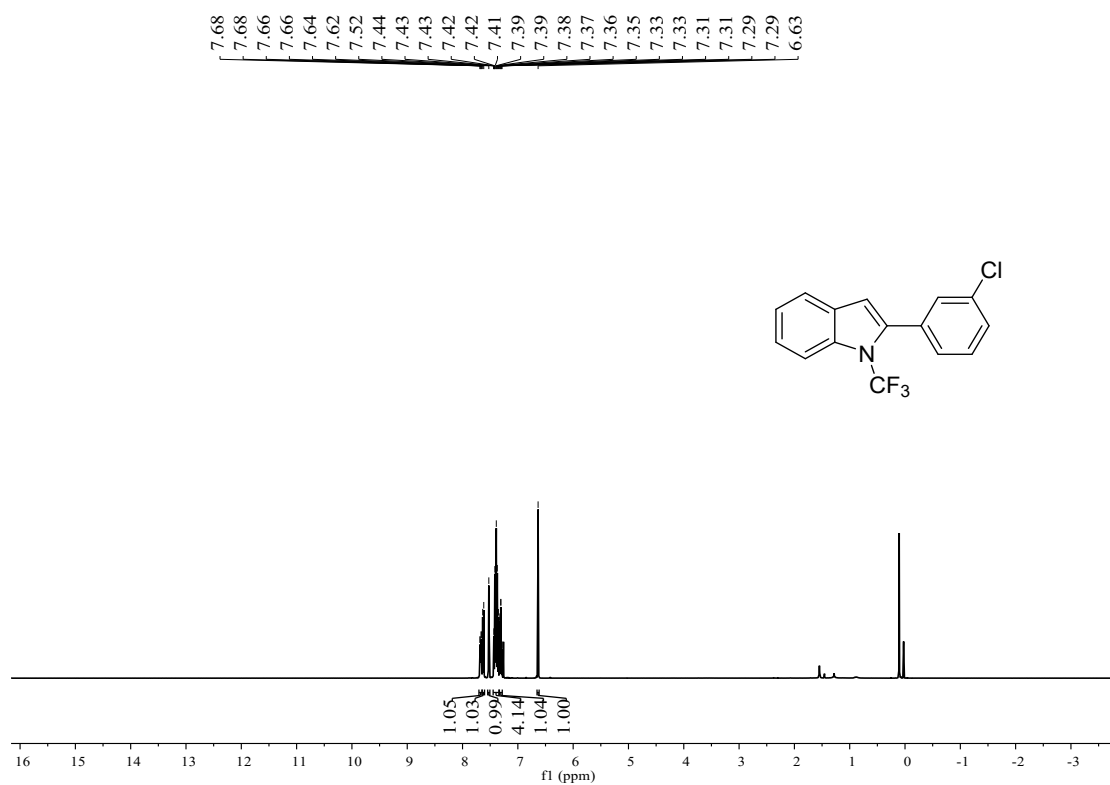

<sup>19</sup>F NMR Spectrum of **3an** (376 MHz, CDCl<sub>3</sub>)

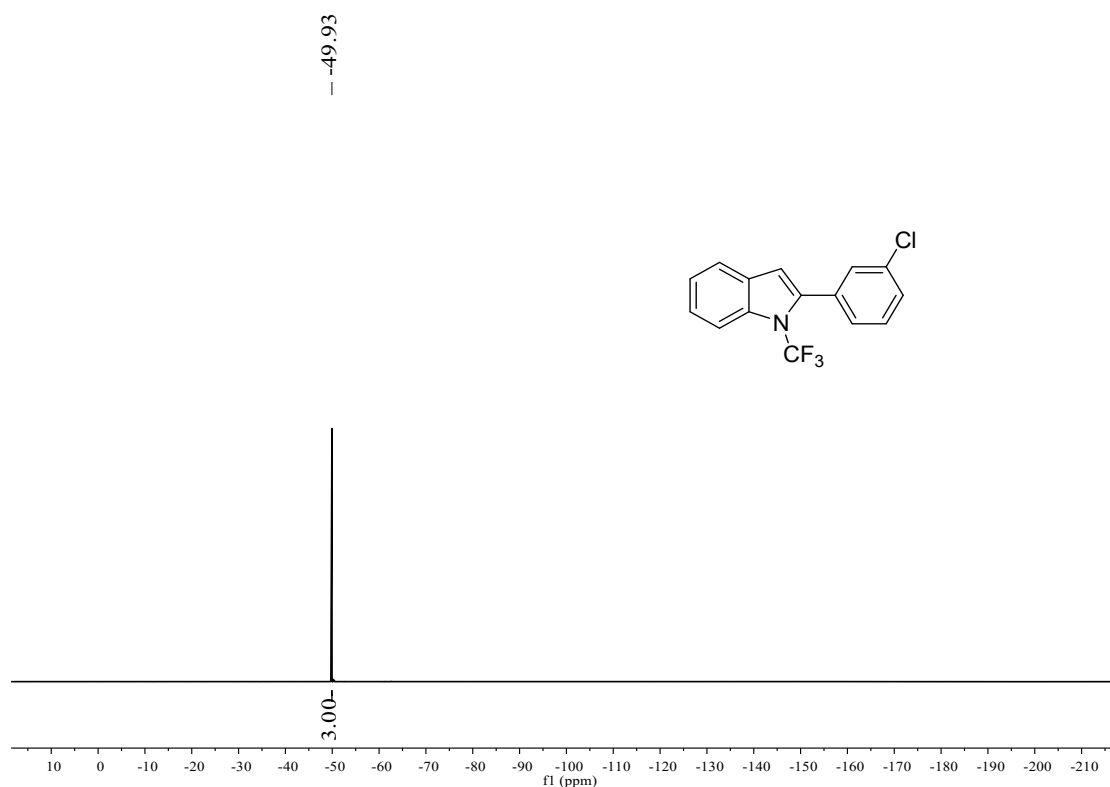

<sup>13</sup>C NMR Spectrum of **3an** (101 MHz, CDCl<sub>3</sub>)

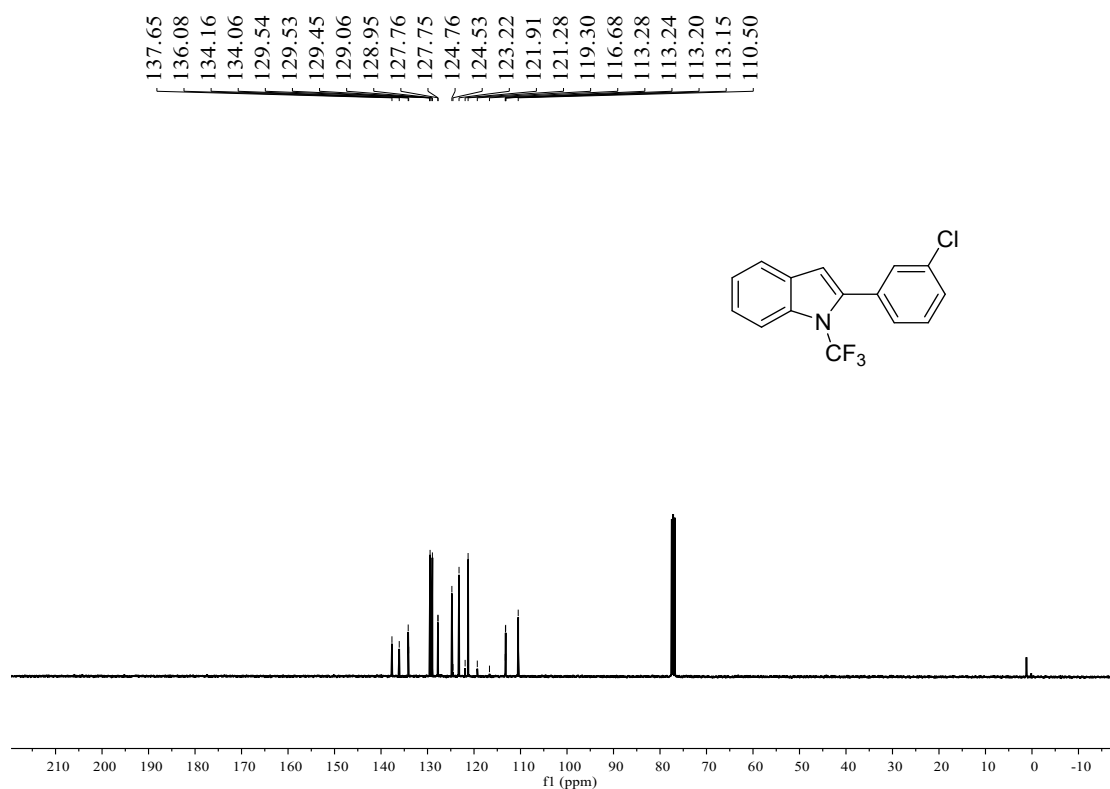

<sup>1</sup>H NMR Spectrum of **3ao** (400 MHz, CDCl<sub>3</sub>)

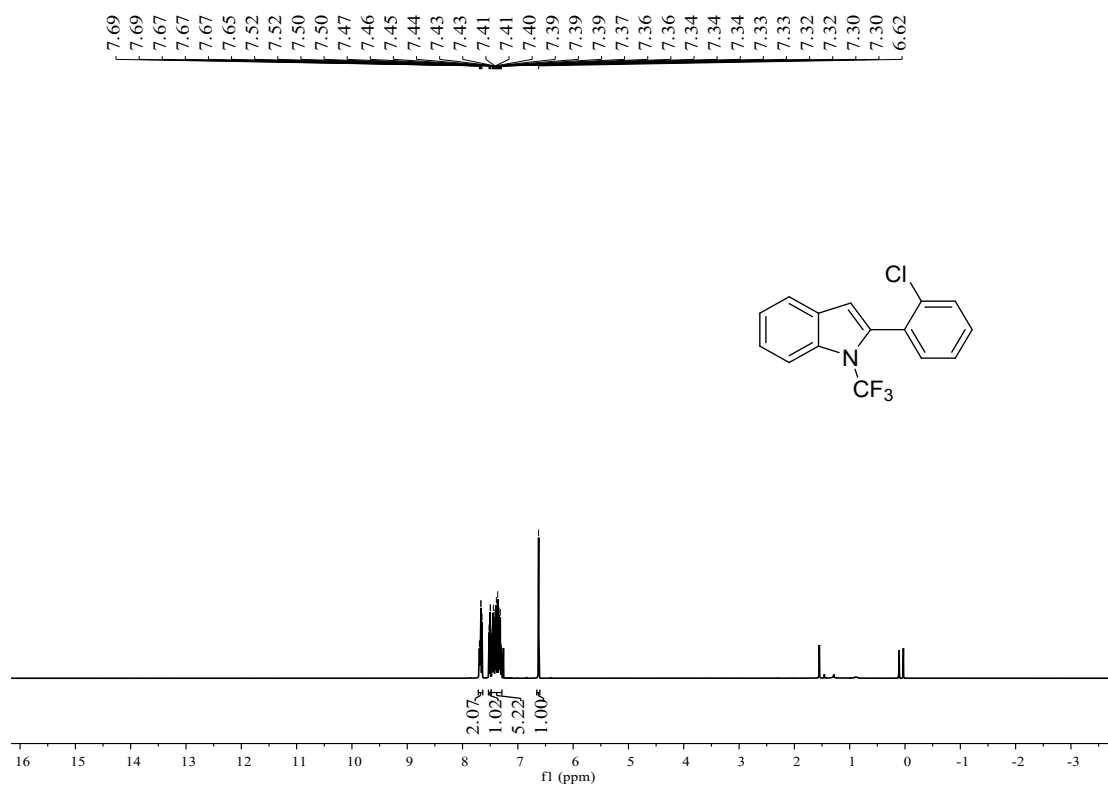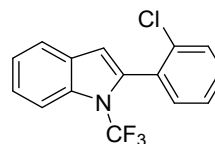

<sup>19</sup>F NMR Spectrum of **3ao** (376 MHz, CDCl<sub>3</sub>)

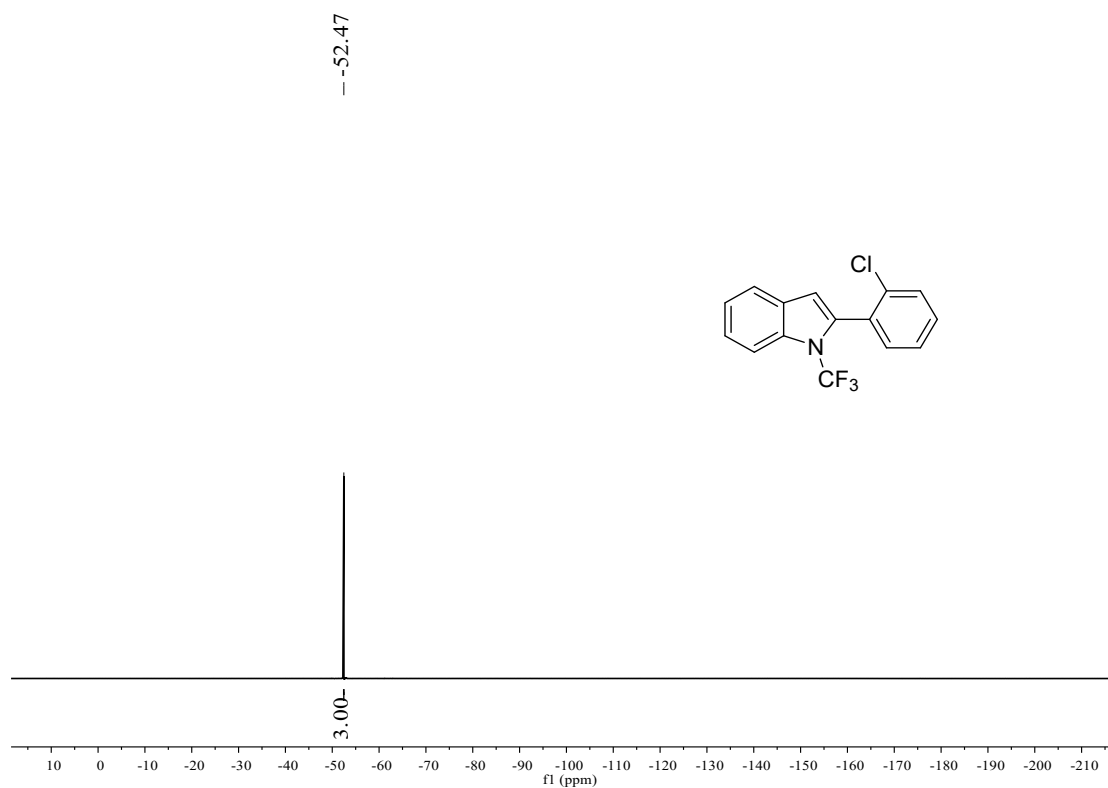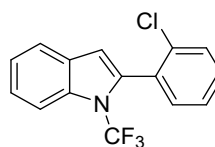

<sup>13</sup>C NMR Spectrum of **3ao** (101 MHz, CDCl<sub>3</sub>)

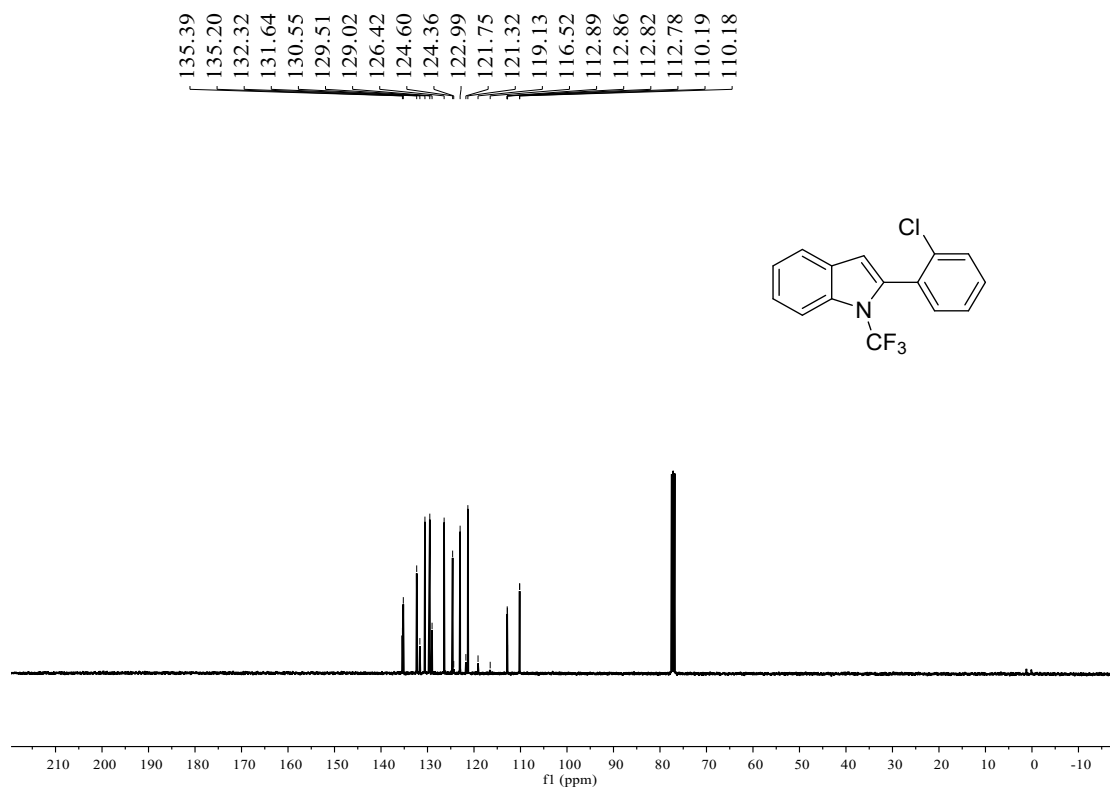

<sup>1</sup>H NMR Spectrum of **3ap** (400 MHz, CDCl<sub>3</sub>)

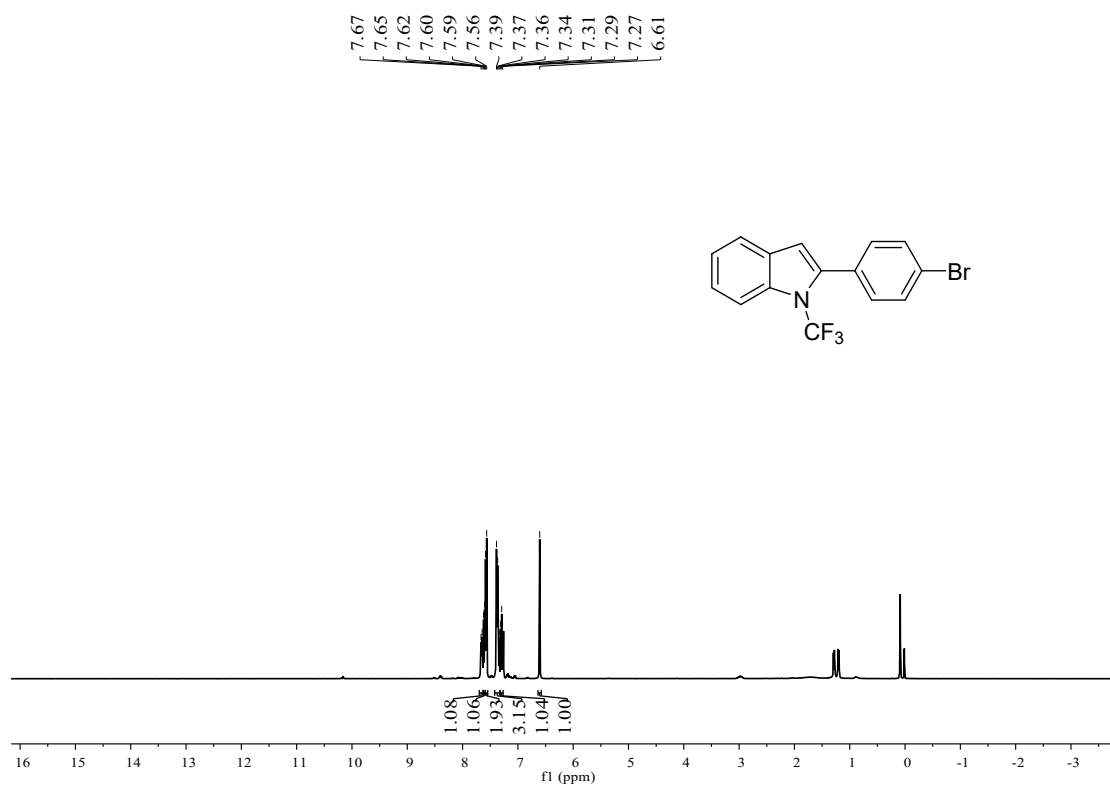



<sup>19</sup>F NMR Spectrum of **3ap** (376 MHz, CDCl<sub>3</sub>)

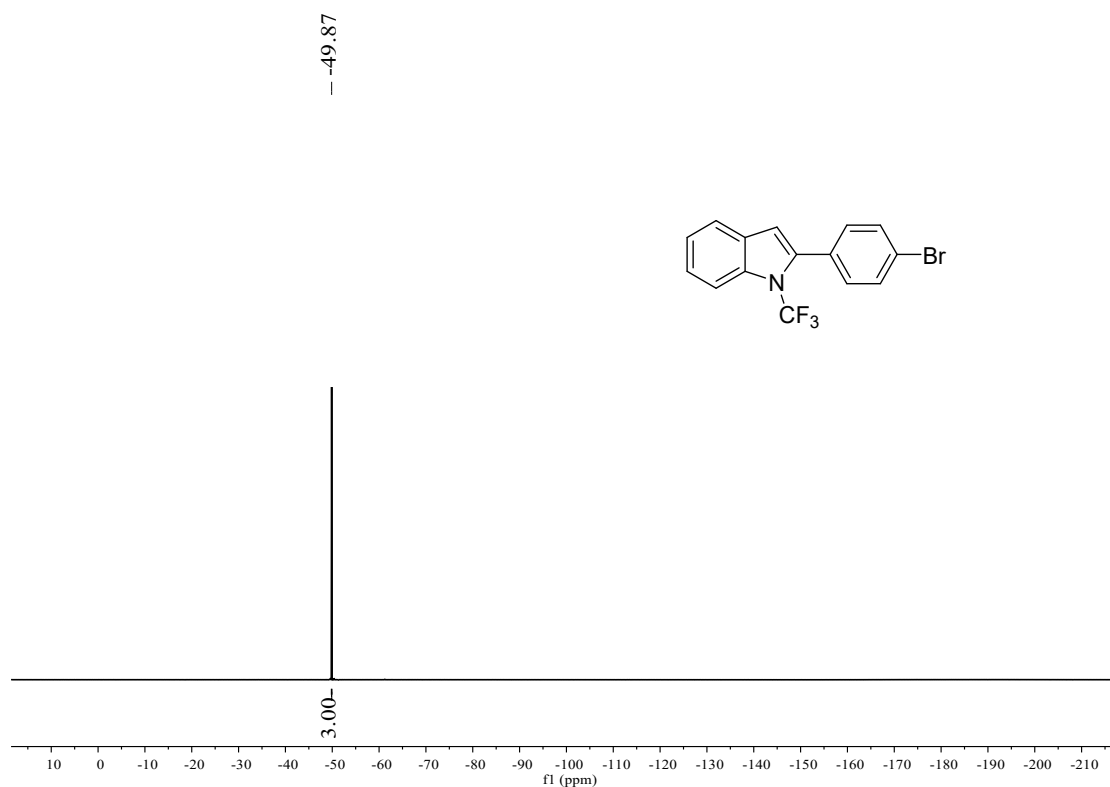

<sup>13</sup>C NMR Spectrum of **3ap** (101 MHz, CDCl<sub>3</sub>)

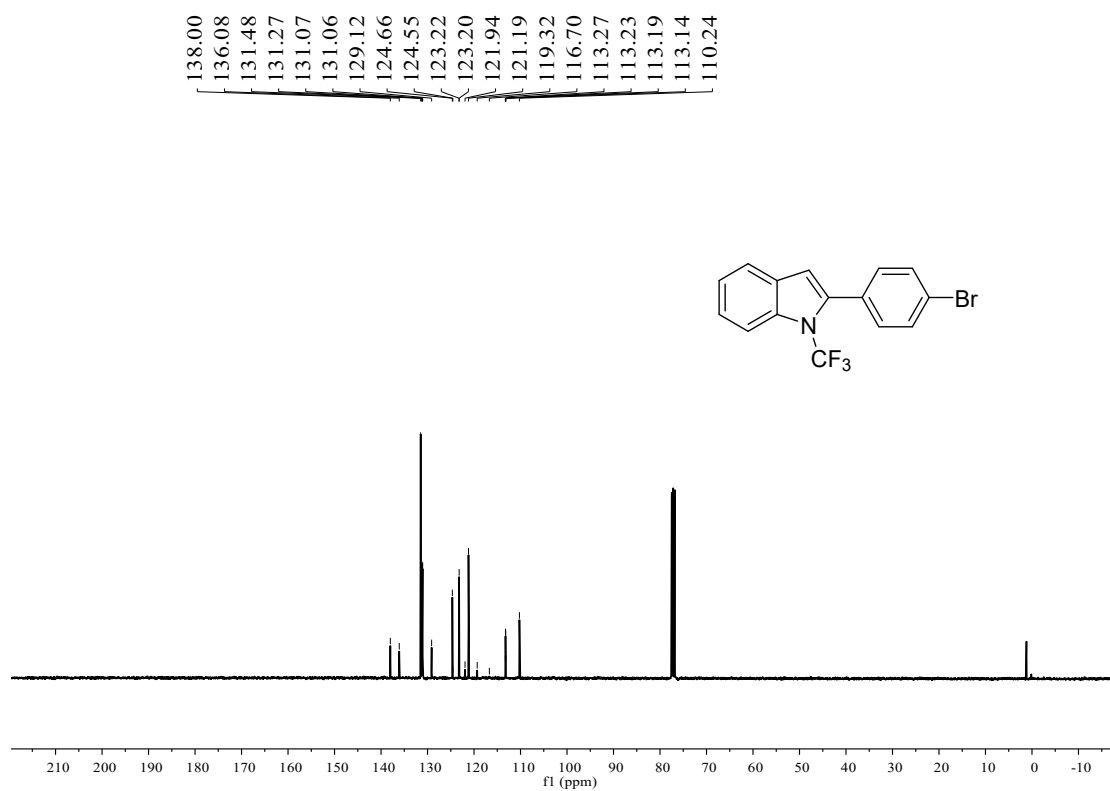

$^1\text{H}$  NMR Spectrum of **3aq** (400 MHz,  $\text{CDCl}_3$ )

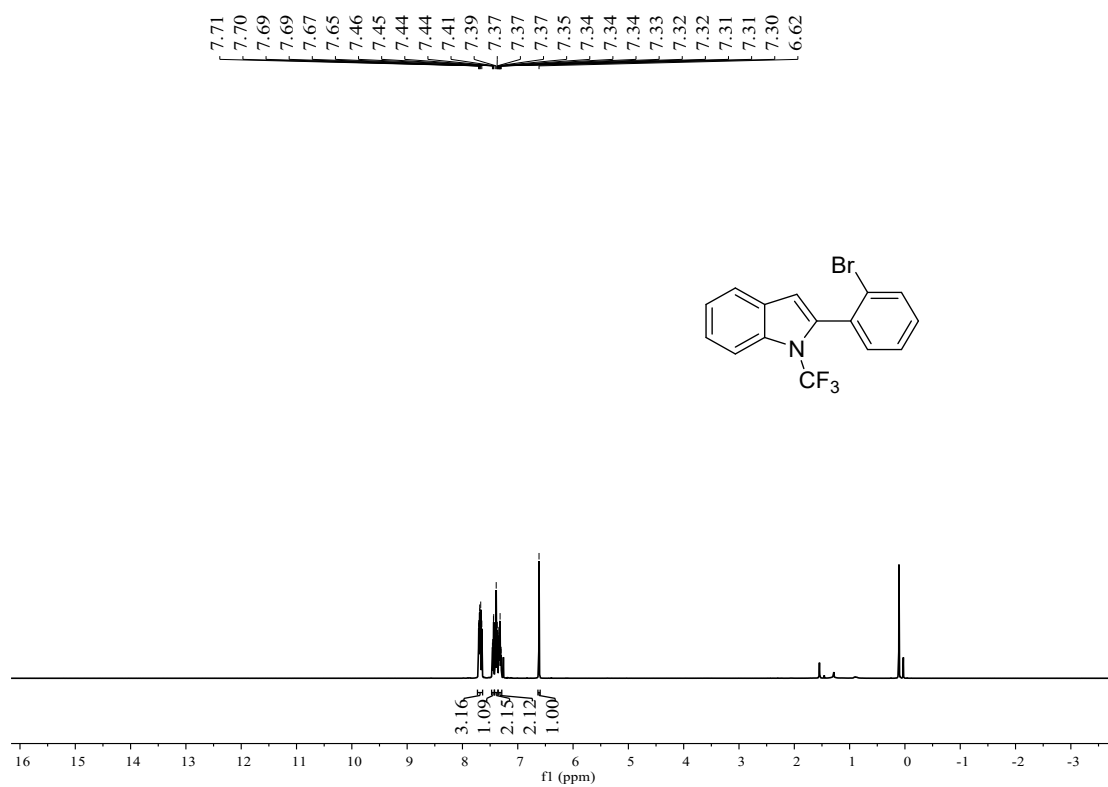

$^{19}\text{F}$  NMR Spectrum of **3aq** (376 MHz,  $\text{CDCl}_3$ )

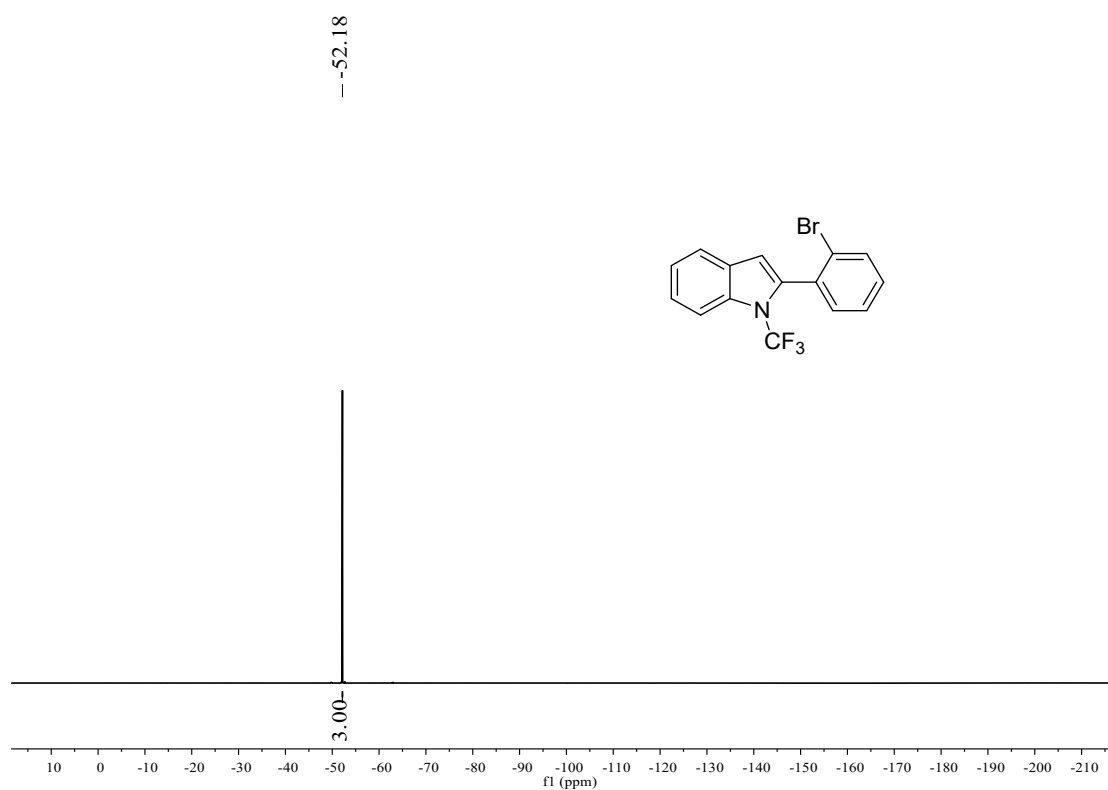

<sup>13</sup>C NMR Spectrum of **3aq** (101 MHz, CDCl<sub>3</sub>)

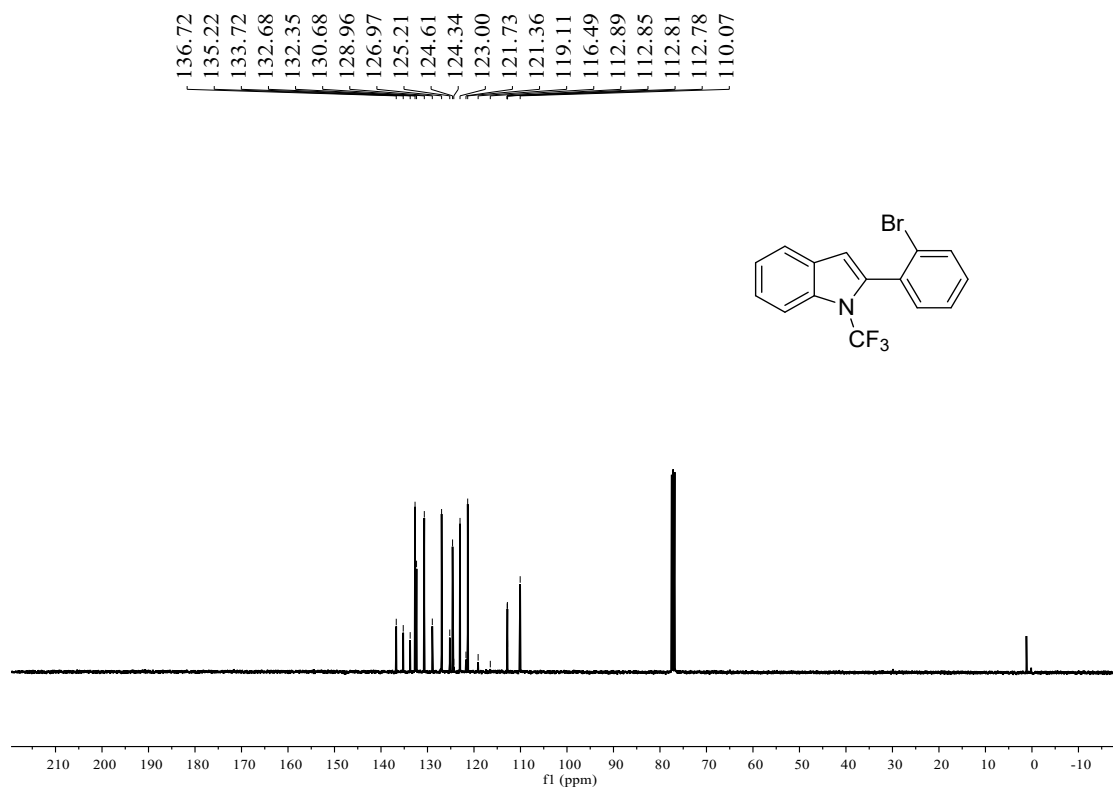

<sup>1</sup>H NMR Spectrum of **3ar** (400 MHz, CDCl<sub>3</sub>)

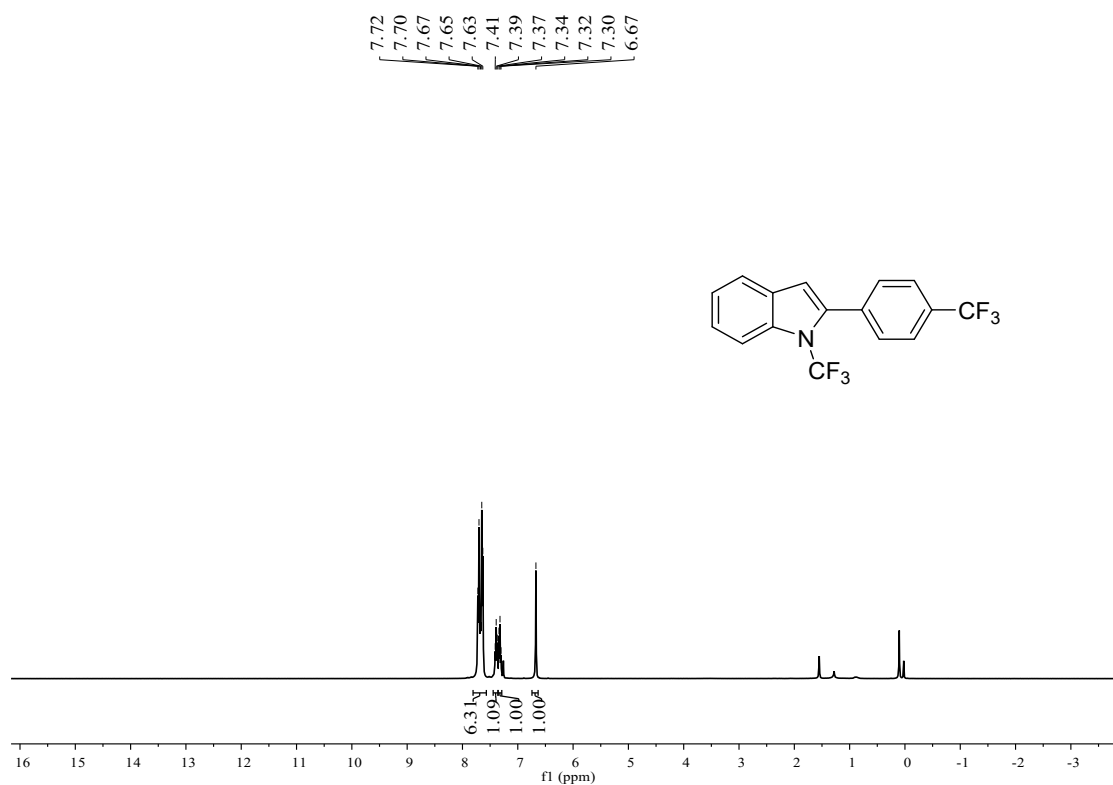

<sup>19</sup>F NMR Spectrum of **3ar** (376 MHz, CDCl<sub>3</sub>)

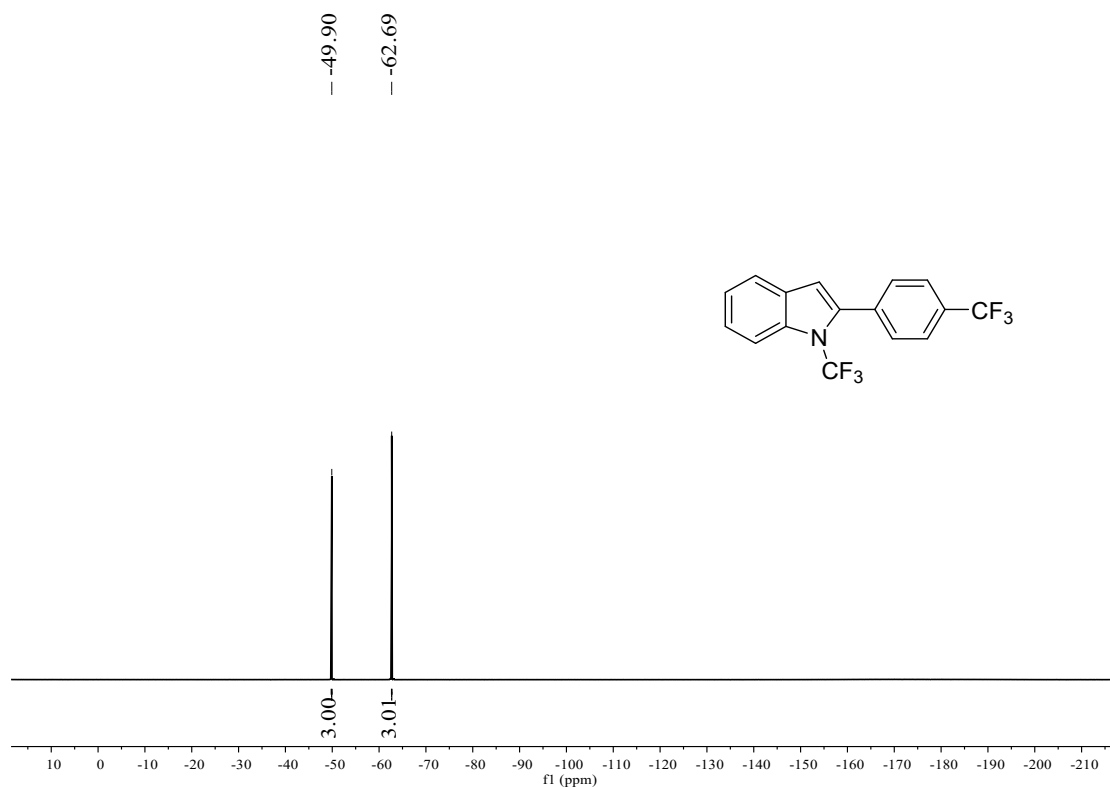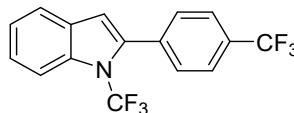

<sup>13</sup>C NMR Spectrum of **3ar** (101 MHz, CDCl<sub>3</sub>)

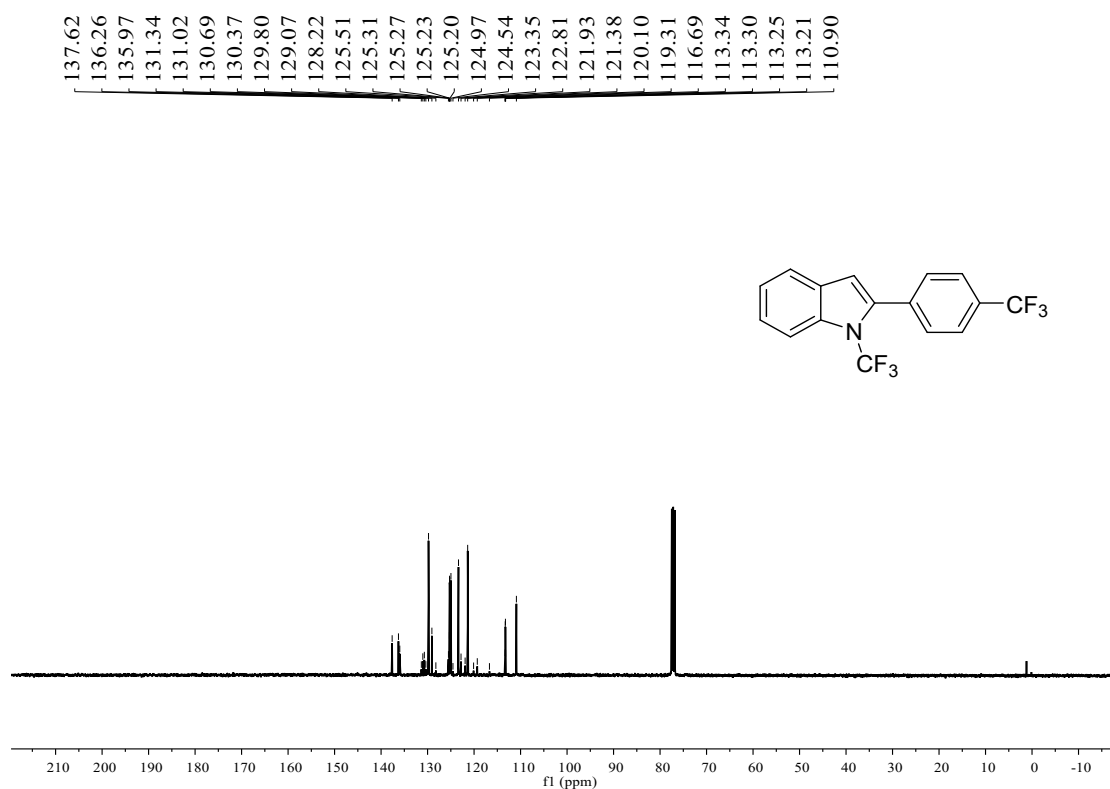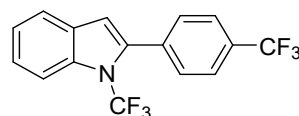

<sup>1</sup>H NMR Spectrum of **3as** (400 MHz, CDCl<sub>3</sub>)

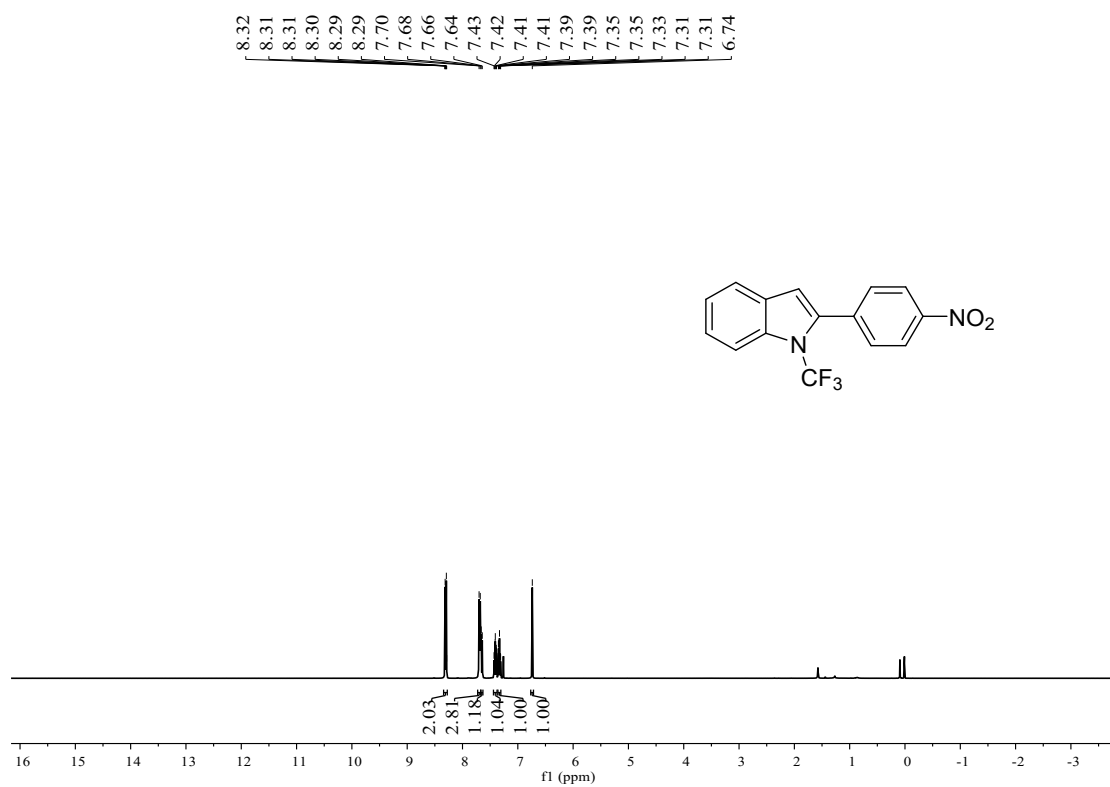

<sup>19</sup>F NMR Spectrum of **3as** (376 MHz, CDCl<sub>3</sub>)

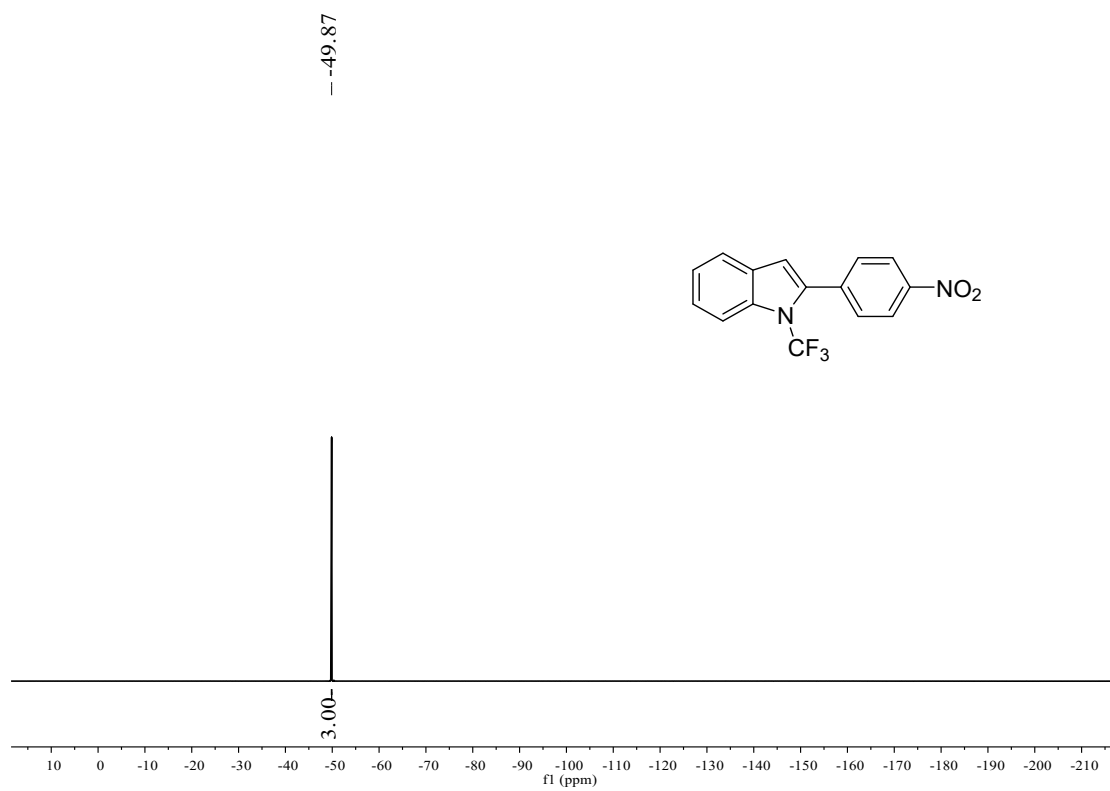

<sup>13</sup>C NMR Spectrum of **3as** (101 MHz, CDCl<sub>3</sub>)

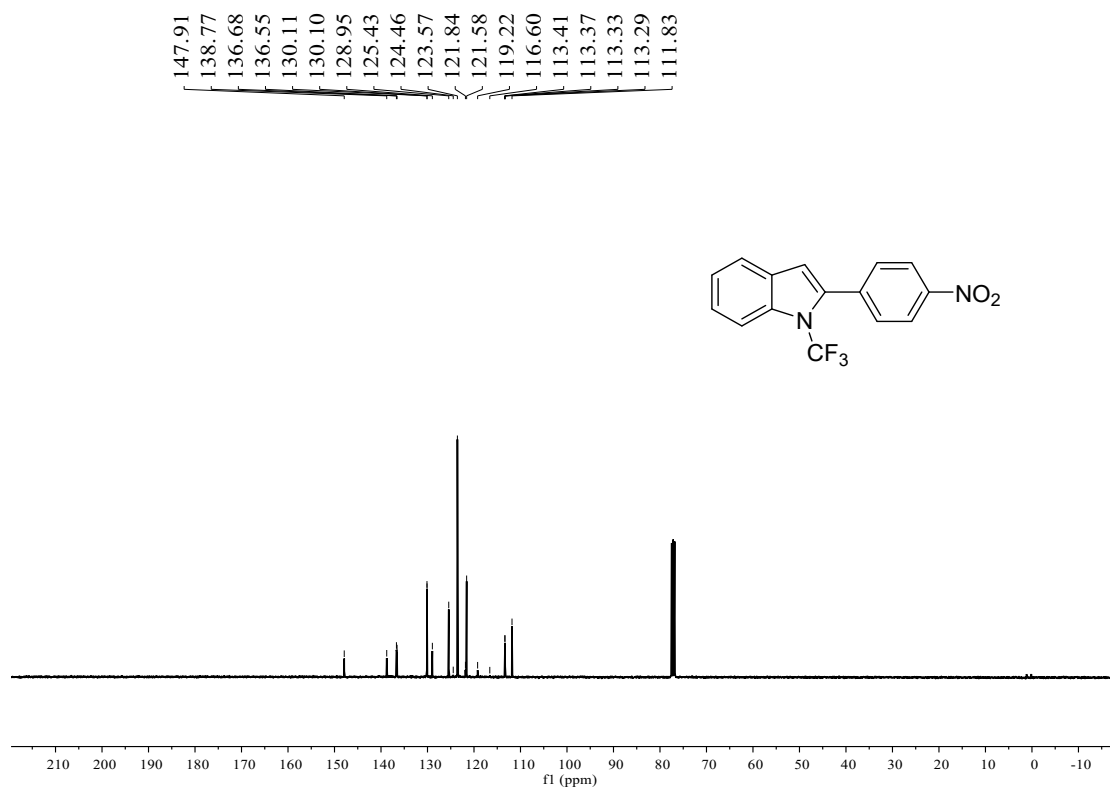

<sup>1</sup>H NMR Spectrum of **3at** (400 MHz, CDCl<sub>3</sub>)

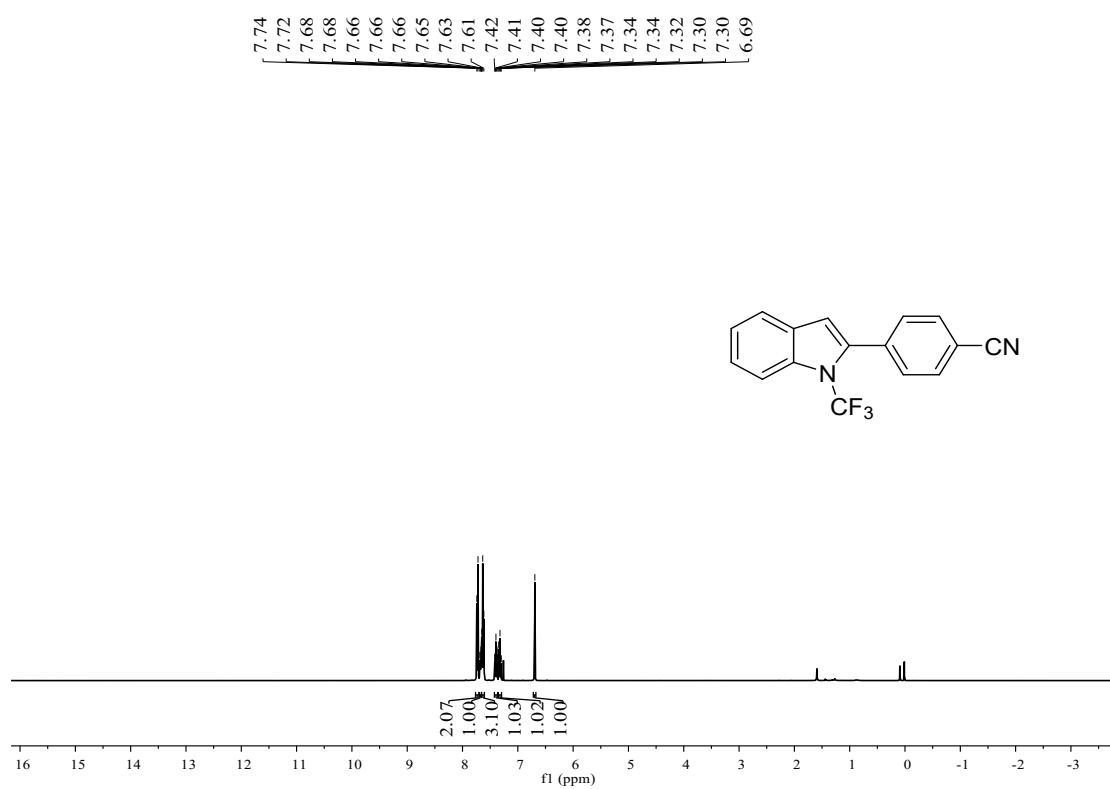

<sup>19</sup>F NMR Spectrum of **3at** (376 MHz, CDCl<sub>3</sub>)

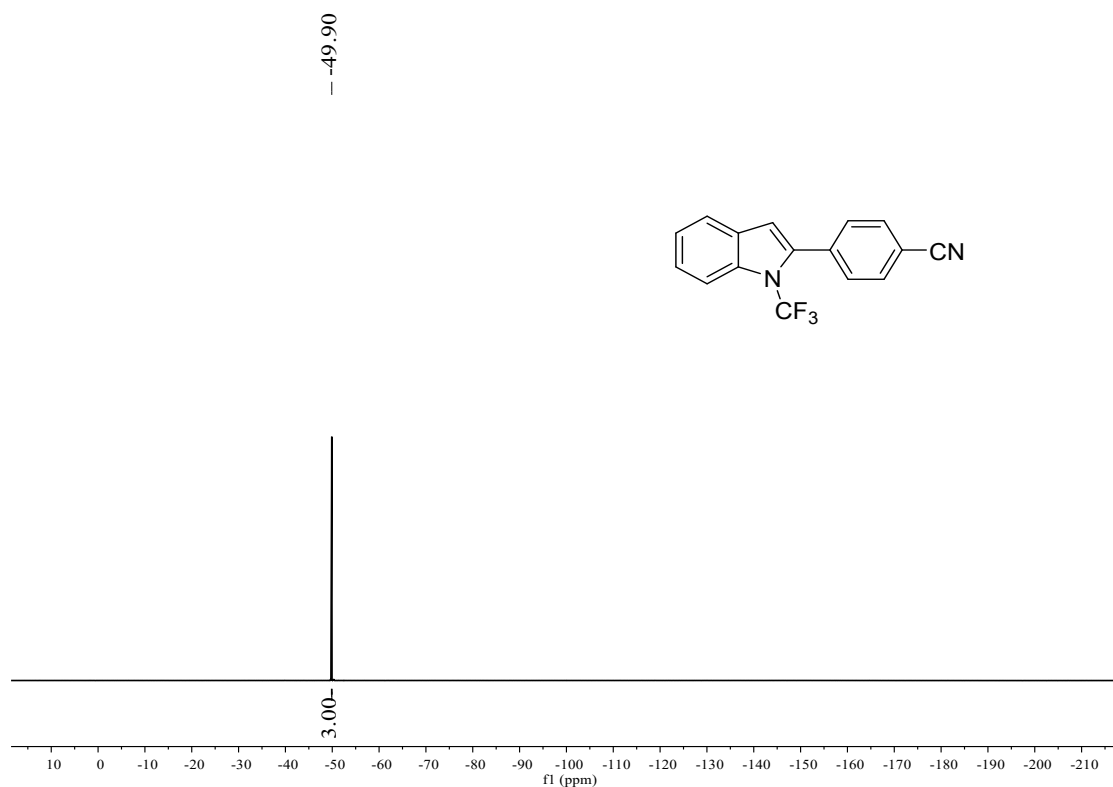

<sup>13</sup>C NMR Spectrum of **3at** (101 MHz, CDCl<sub>3</sub>)

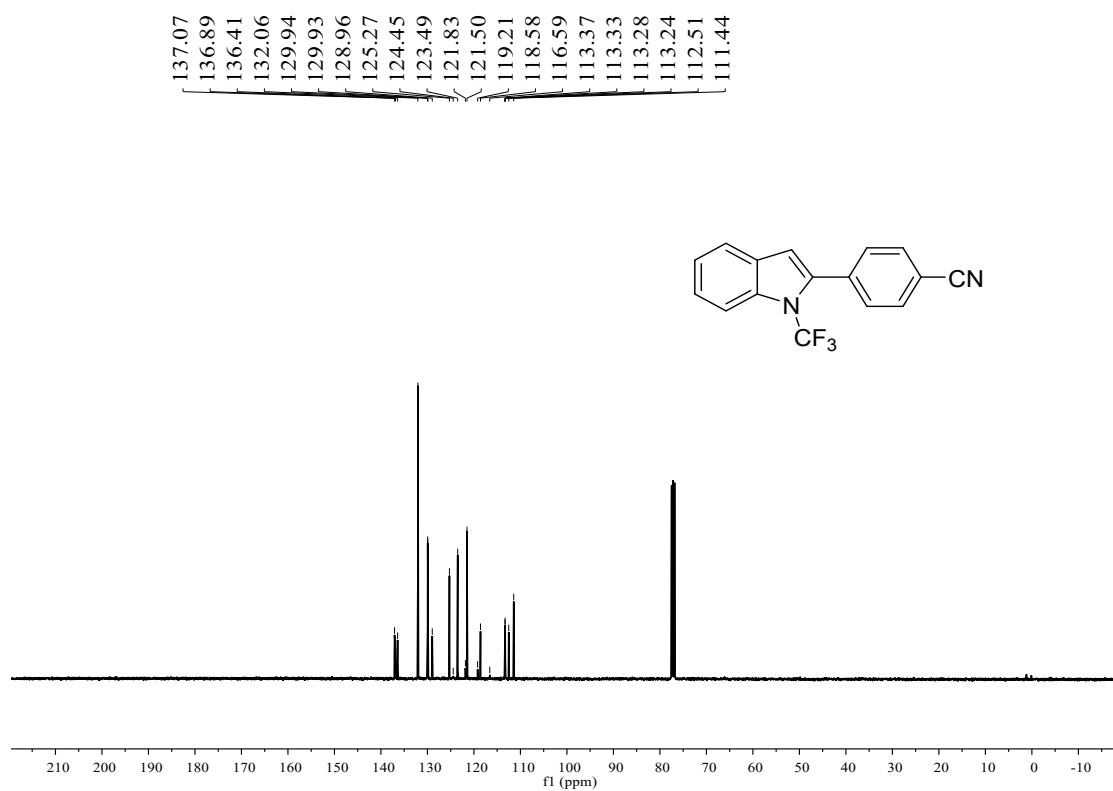

$^1\text{H}$  NMR Spectrum of **3au** (400 MHz,  $\text{CDCl}_3$ )

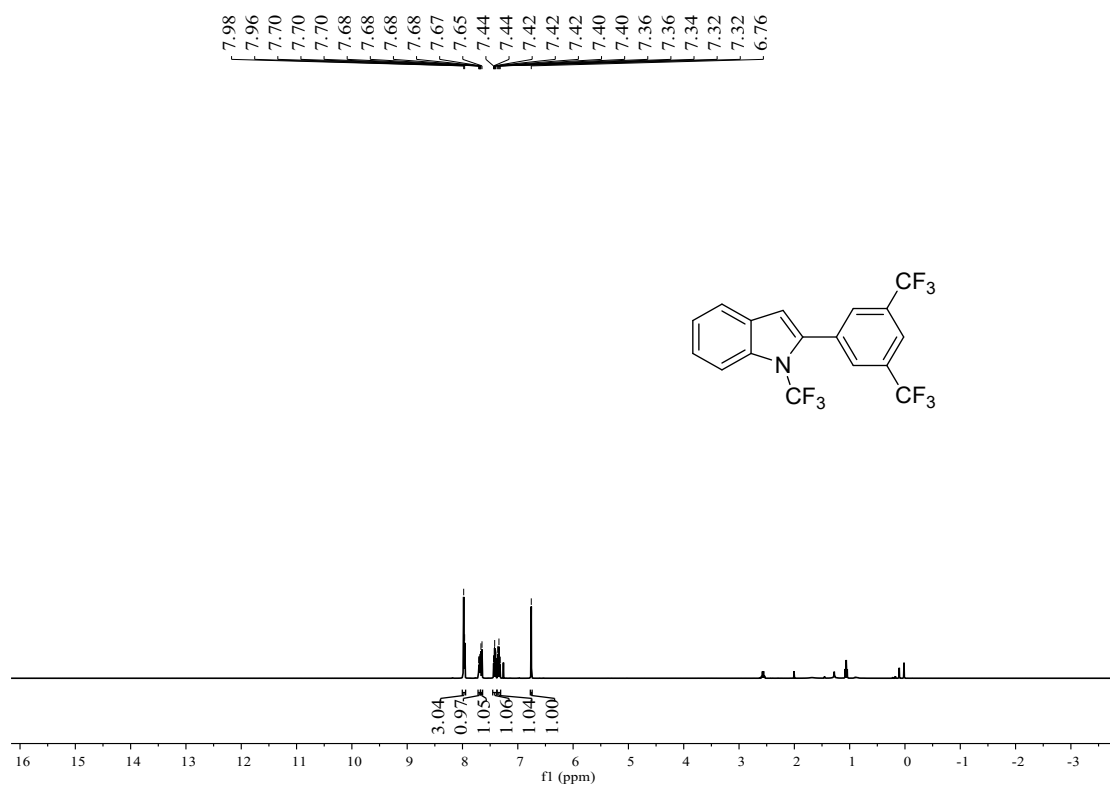

$^{19}\text{F}$  NMR Spectrum of **3au** (376 MHz,  $\text{CDCl}_3$ )

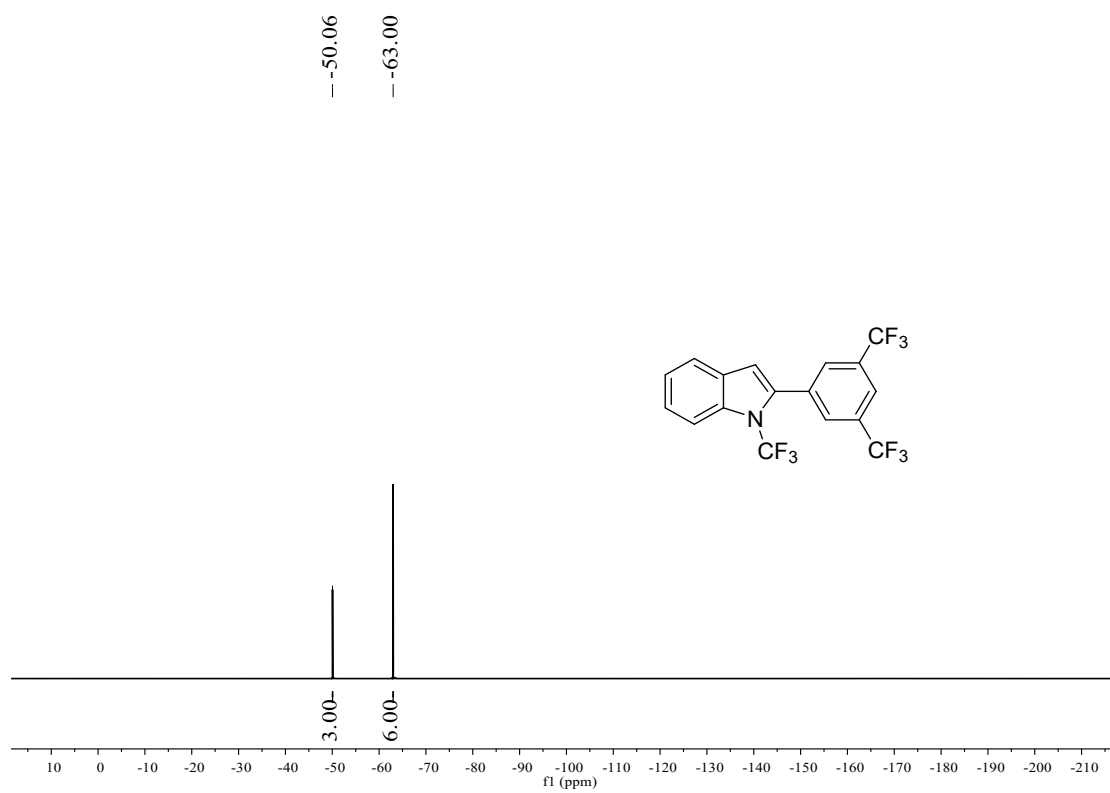



<sup>13</sup>C NMR Spectrum of **3au** (101 MHz, CDCl<sub>3</sub>)

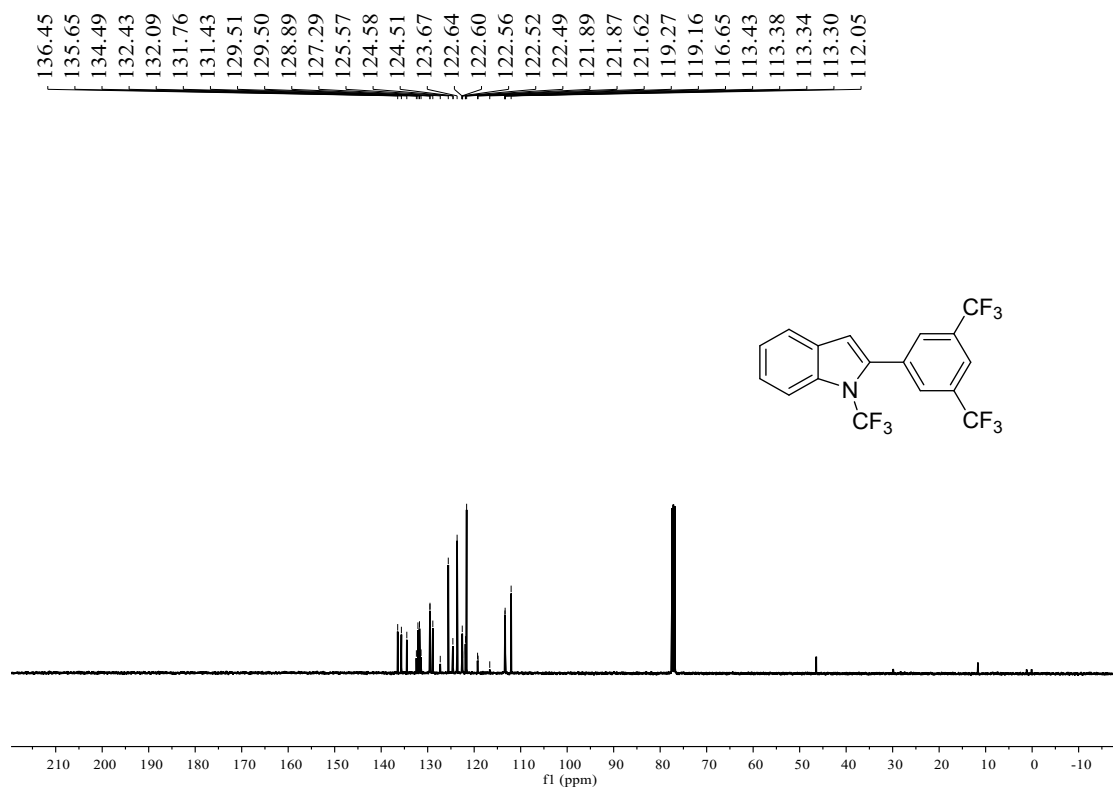

<sup>1</sup>H NMR Spectrum of **3av** (400 MHz, CDCl<sub>3</sub>)

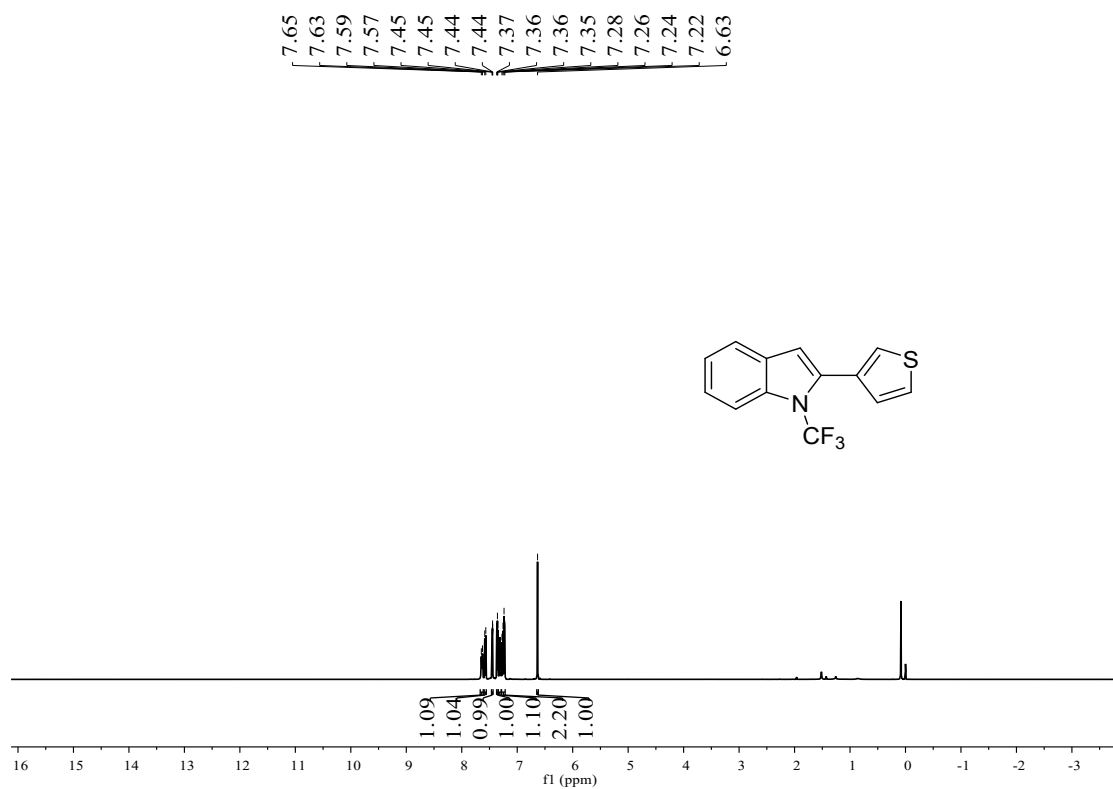

<sup>19</sup>F NMR Spectrum of **3av** (376 MHz, CDCl<sub>3</sub>)

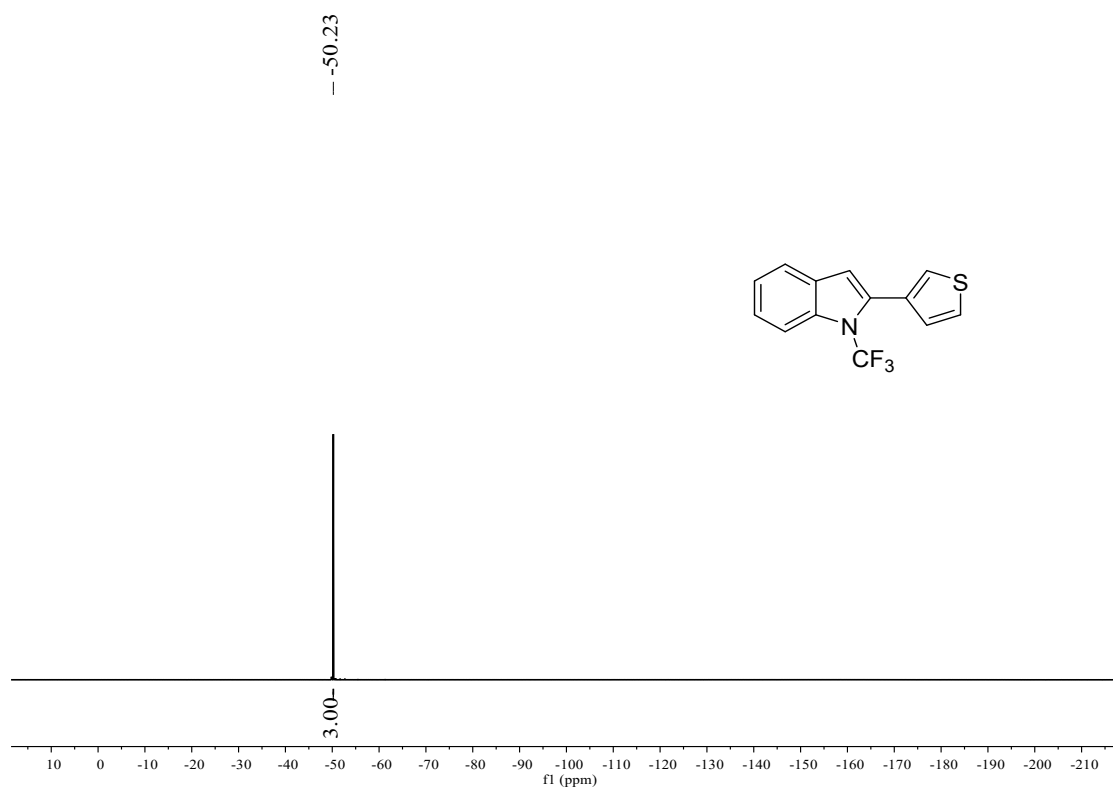

<sup>13</sup>C NMR Spectrum of **3av** (101 MHz, CDCl<sub>3</sub>)

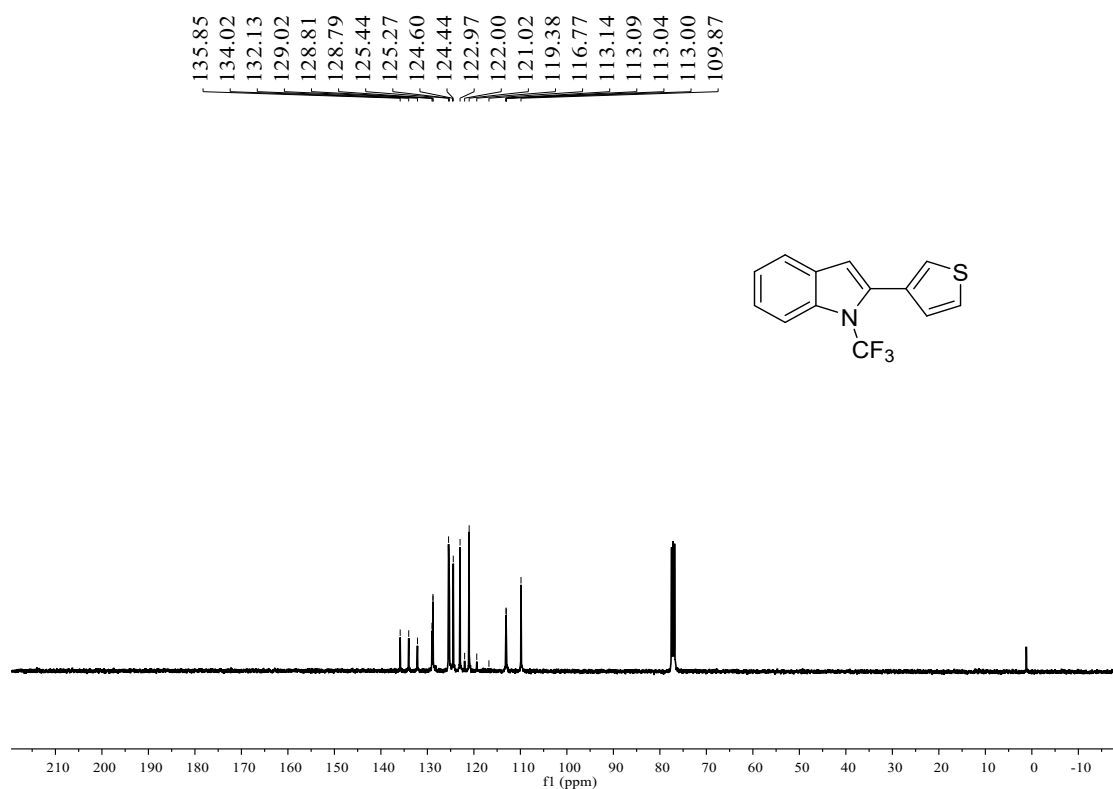

<sup>1</sup>H NMR Spectrum of **3aw** (400 MHz, CDCl<sub>3</sub>)

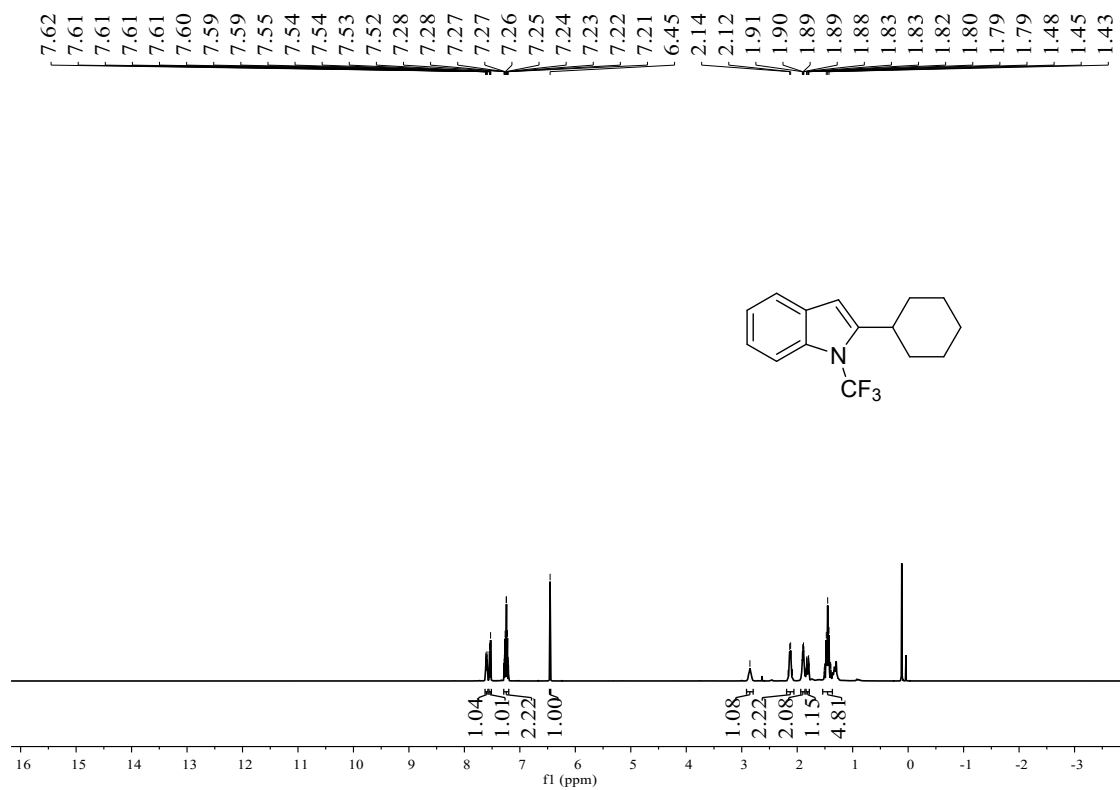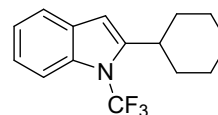

<sup>19</sup>F NMR Spectrum of **3aw** (376 MHz, CDCl<sub>3</sub>)

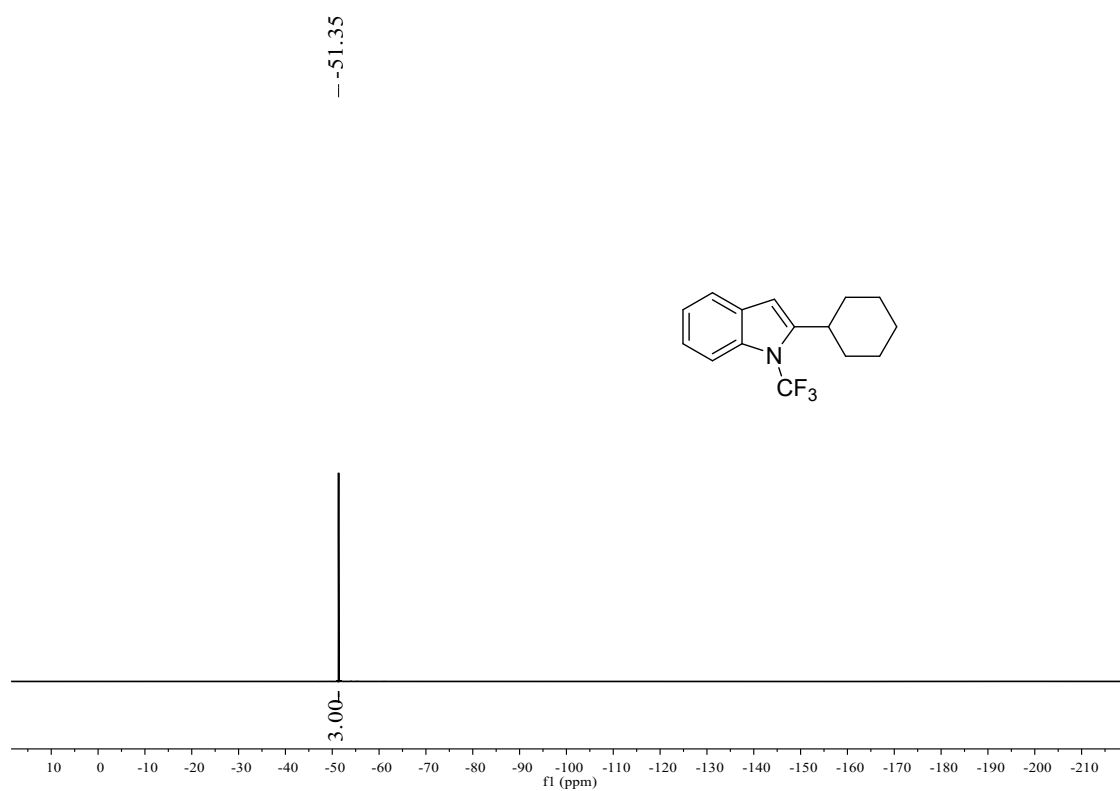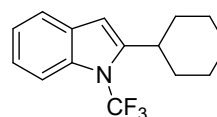

<sup>13</sup>C NMR Spectrum of **3aw** (101 MHz, CDCl<sub>3</sub>)

146.16  
135.29  
129.39  
125.05  
123.42  
122.48  
122.45  
120.50  
119.85  
117.25  
112.78  
112.73  
112.68  
112.63  
104.63

37.12  
37.09  
37.06  
37.03  
34.31  
26.79  
26.29

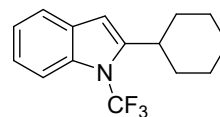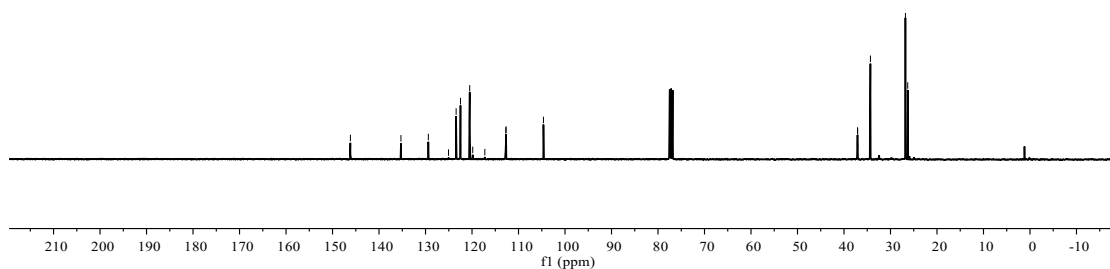

<sup>1</sup>H NMR Spectrum of **3ax** (400 MHz, CDCl<sub>3</sub>)

7.60  
7.60  
7.58  
7.54  
7.53  
7.52  
7.52  
7.28  
7.28  
7.27  
7.26  
7.25  
7.24  
7.23  
7.22  
7.21  
6.43  
2.86  
2.84  
2.82  
1.81  
1.79  
1.77  
1.75  
1.73  
1.49  
1.48  
1.47  
1.46  
1.45  
1.40  
1.39  
1.38  
1.37  
1.36  
1.35  
0.96  
0.94  
0.93  
0.93

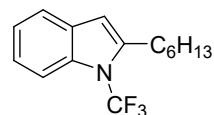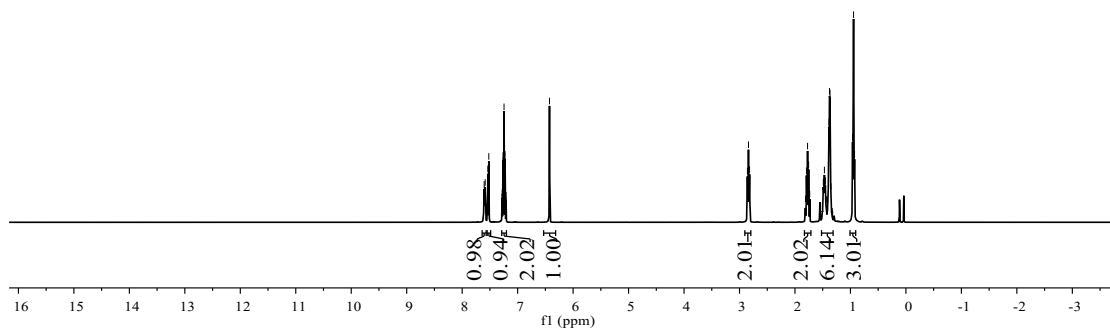

<sup>19</sup>F NMR Spectrum of **3ax** (376 MHz, CDCl<sub>3</sub>)

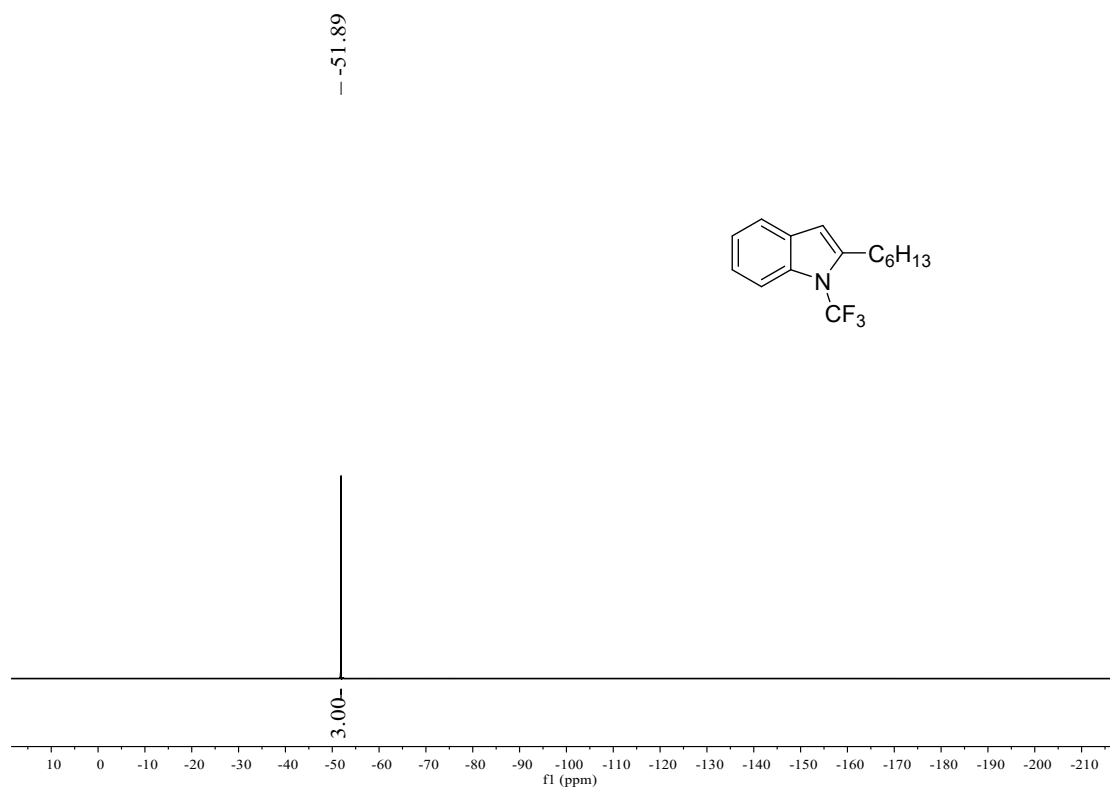

<sup>13</sup>C NMR Spectrum of **3ax** (101 MHz, CDCl<sub>3</sub>)

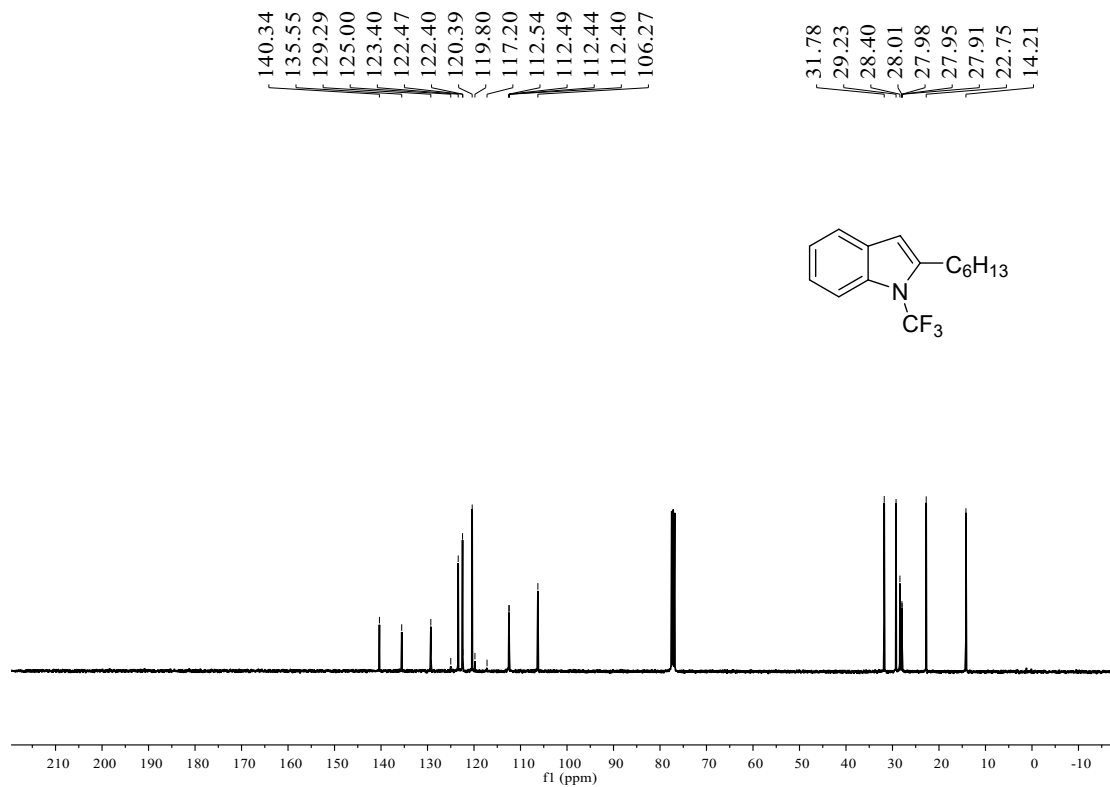

<sup>1</sup>H NMR Spectrum of **3ay** (400 MHz, CDCl<sub>3</sub>)

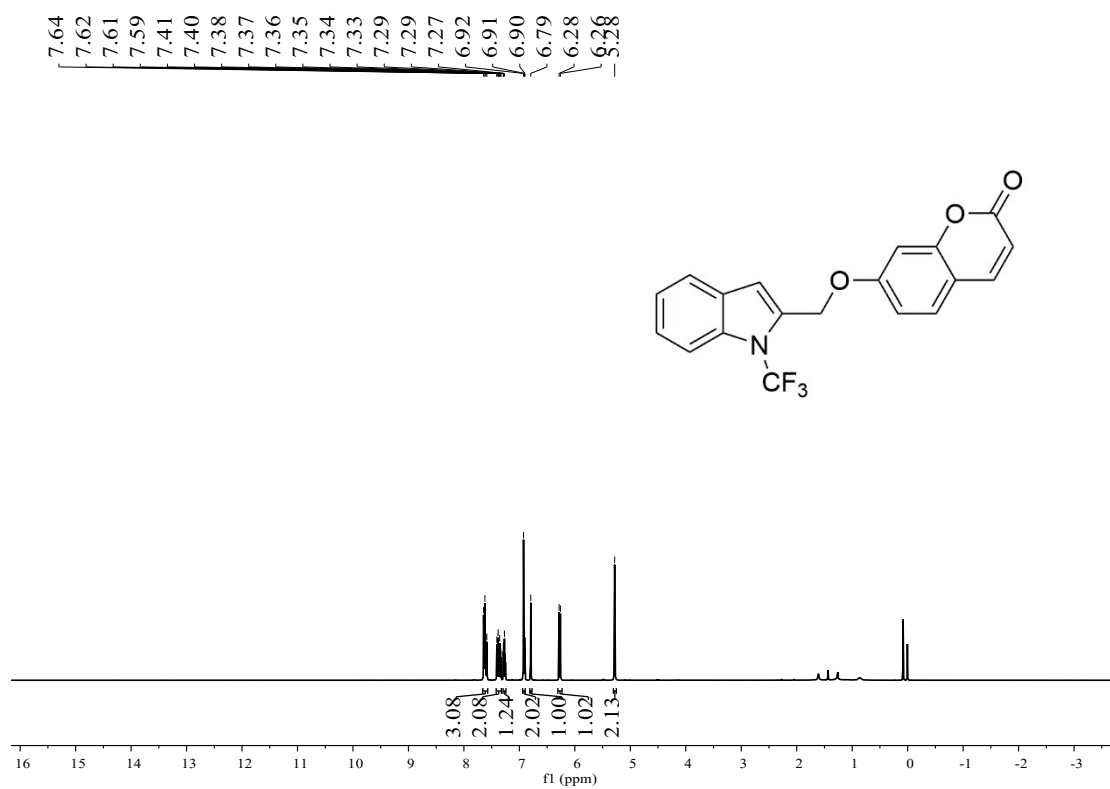

<sup>19</sup>F NMR Spectrum of **3ay** (376 MHz, CDCl<sub>3</sub>)

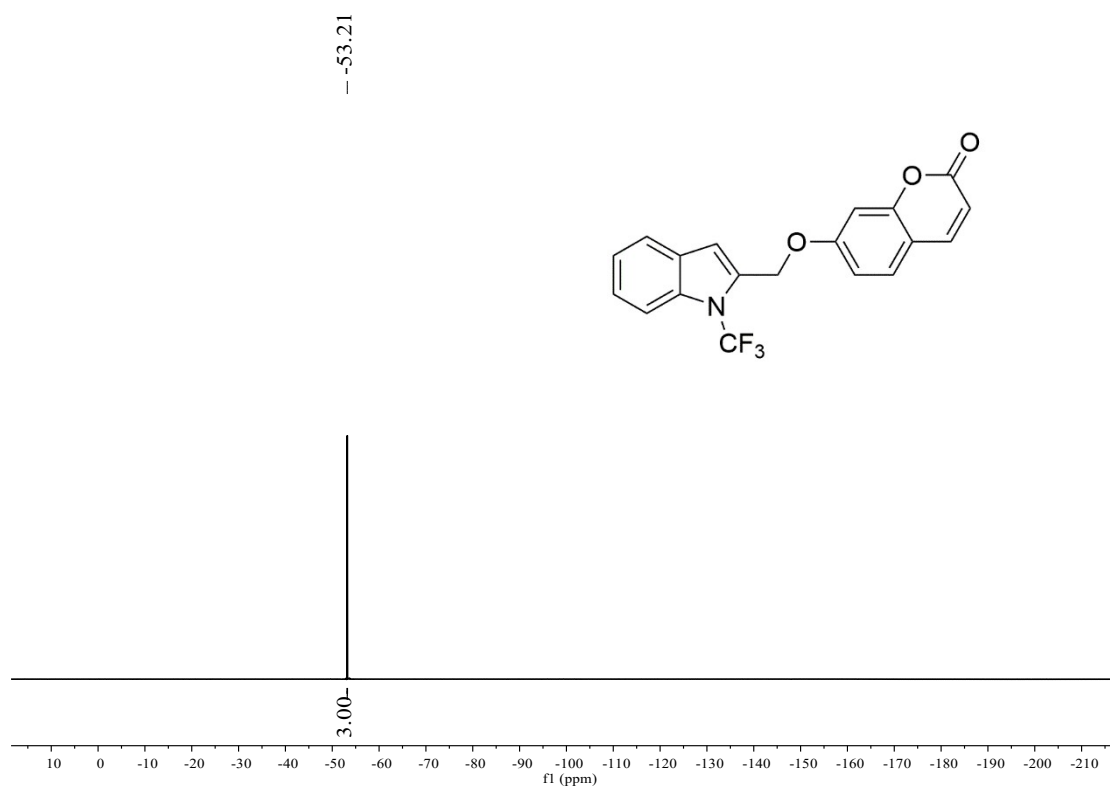

<sup>13</sup>C NMR Spectrum of **3ay** (101 MHz, CDCl<sub>3</sub>)

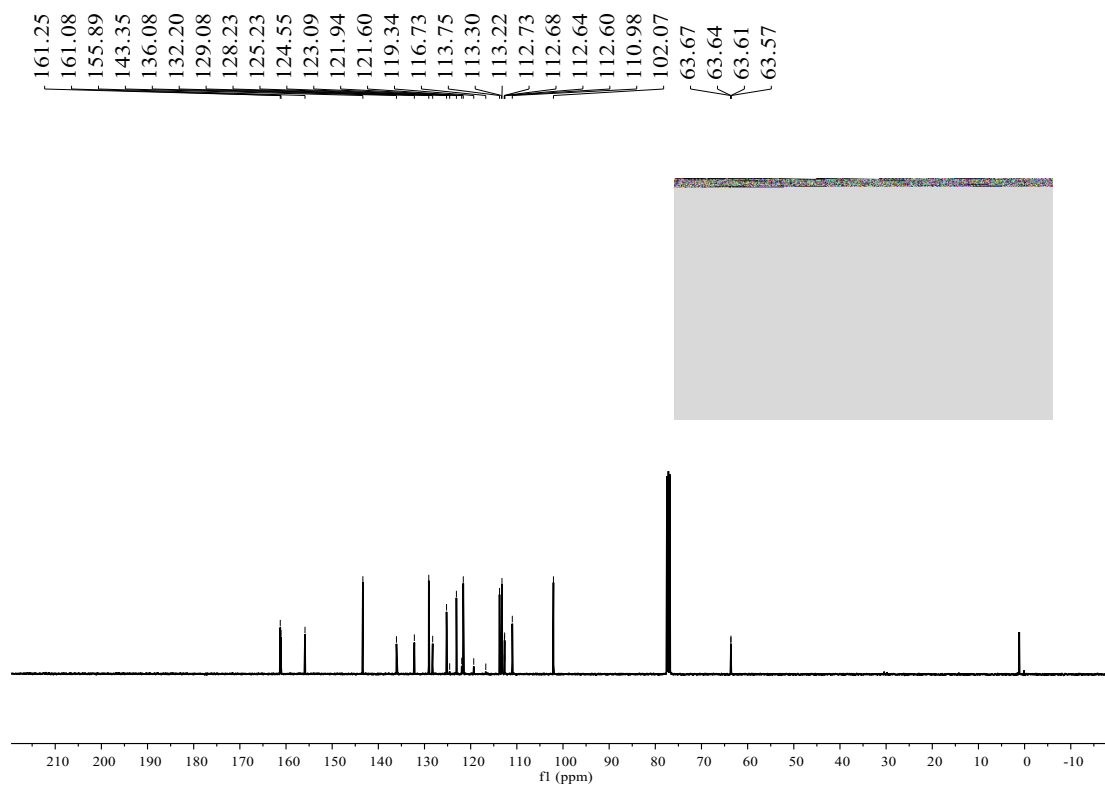

<sup>1</sup>H NMR Spectrum of **3az** (400 MHz, CDCl<sub>3</sub>)

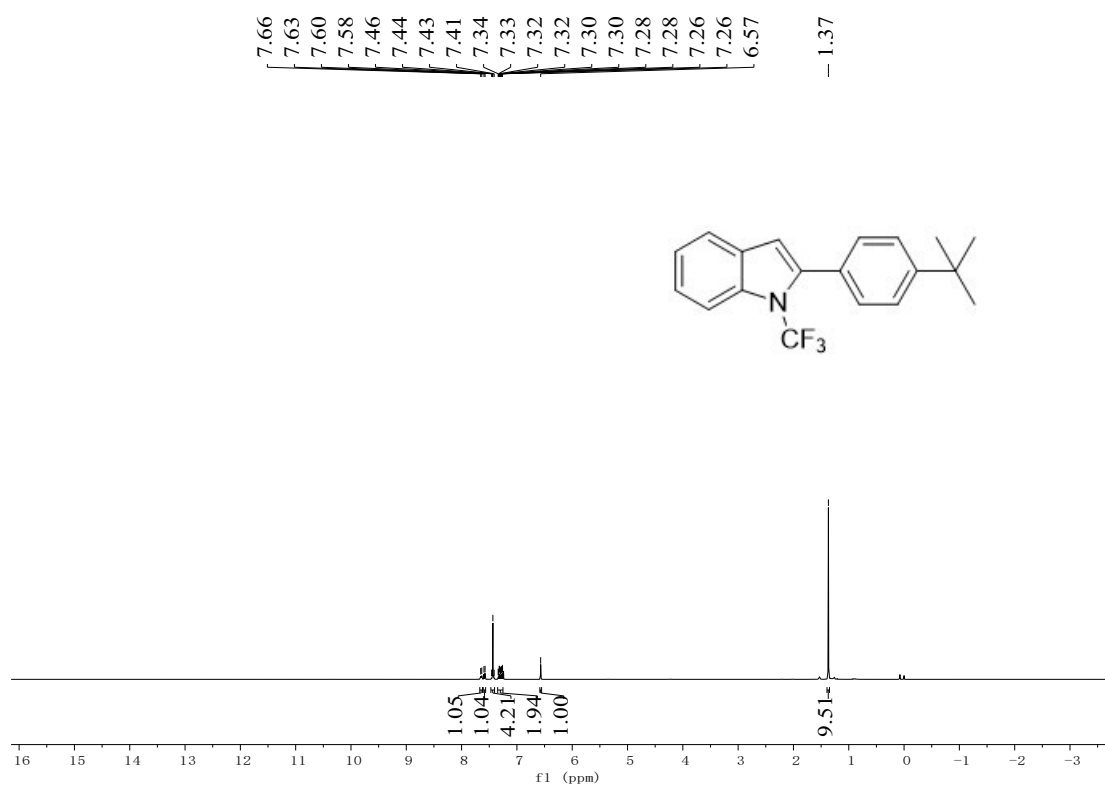

<sup>19</sup>F NMR Spectrum of **3az** (376 MHz, CDCl<sub>3</sub>)

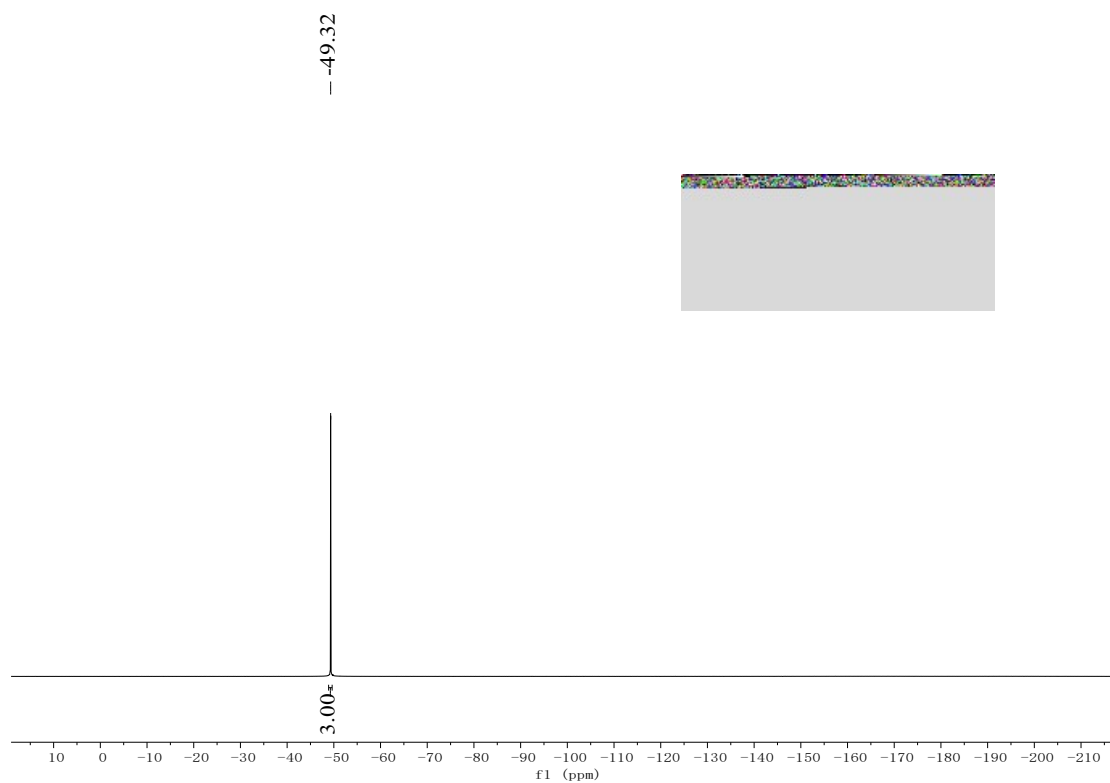

<sup>13</sup>C NMR Spectrum of **3az** (101 MHz, CDCl<sub>3</sub>)

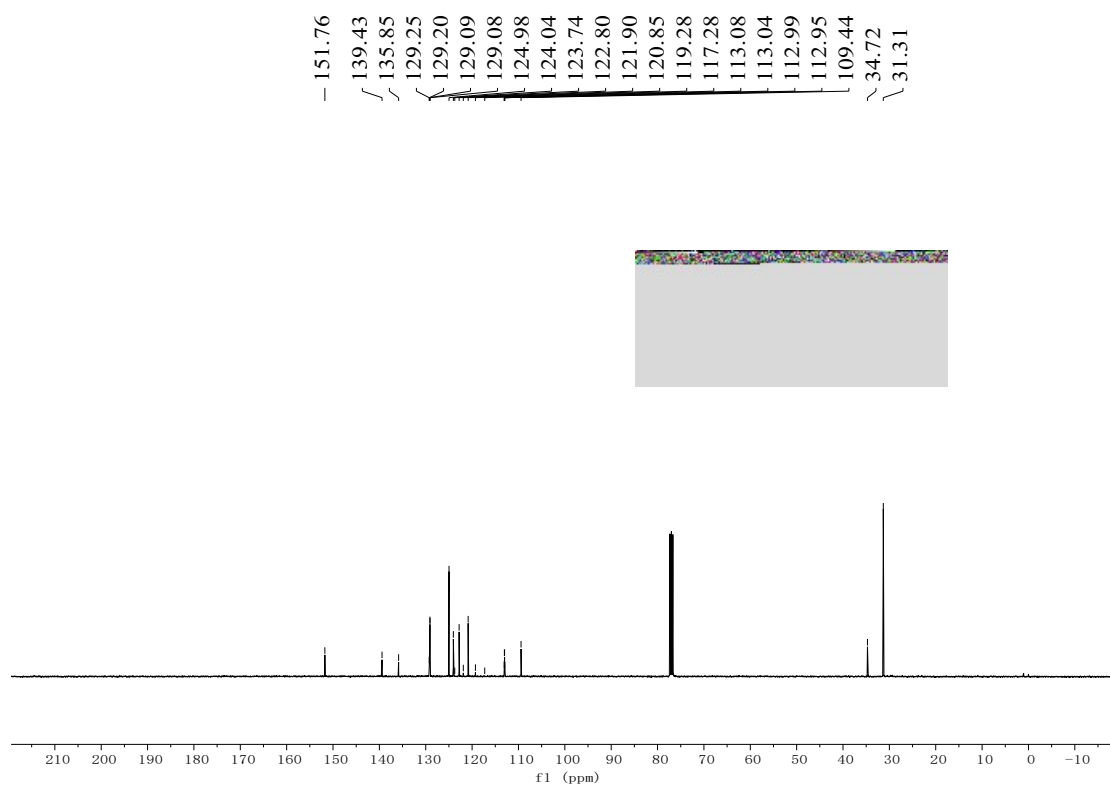



<sup>1</sup>H NMR Spectrum of **3aa'** (400 MHz, CDCl<sub>3</sub>)

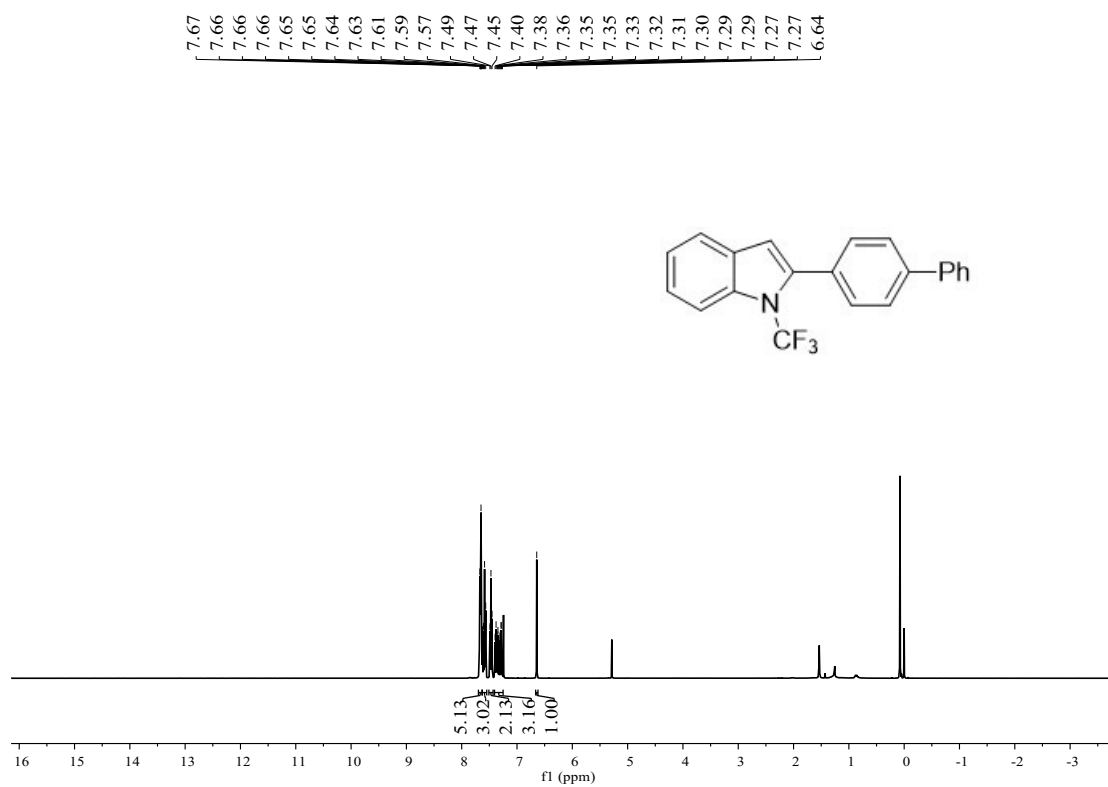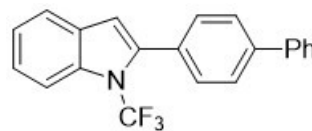

<sup>19</sup>F NMR Spectrum of **3aa'** (376 MHz, CDCl<sub>3</sub>)

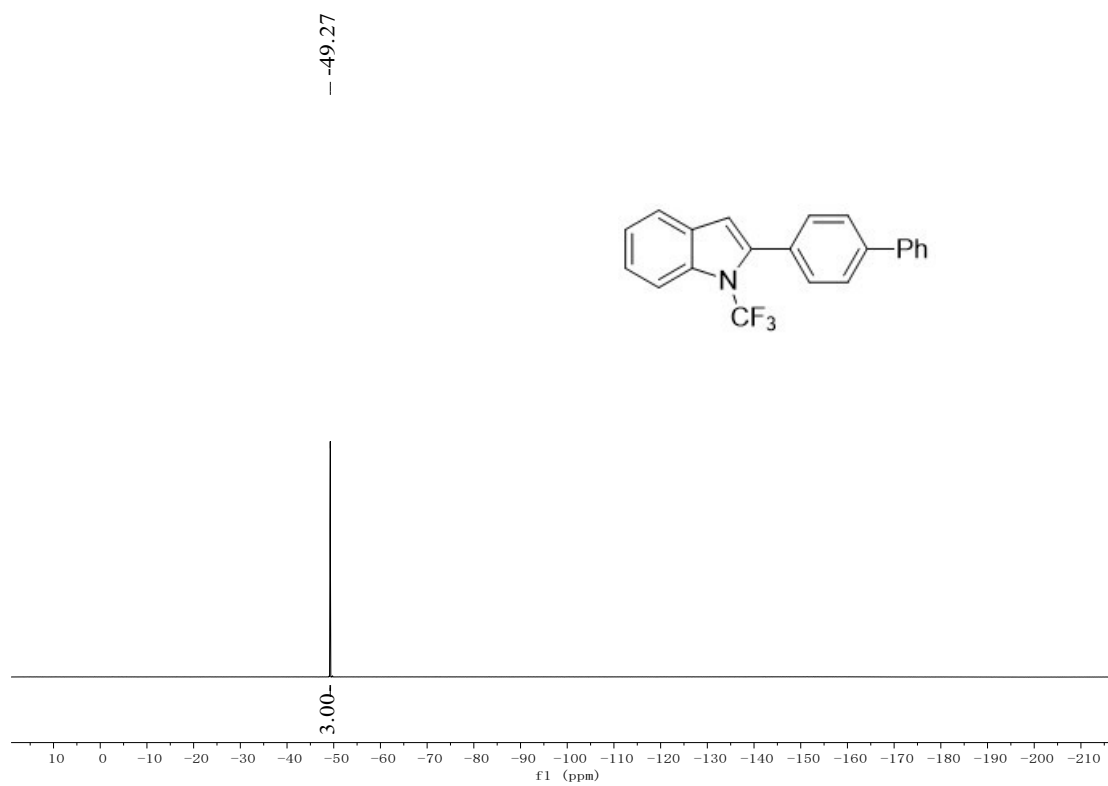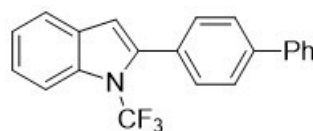

<sup>13</sup>C NMR Spectrum of **3aa'** (101 MHz, CDCl<sub>3</sub>)

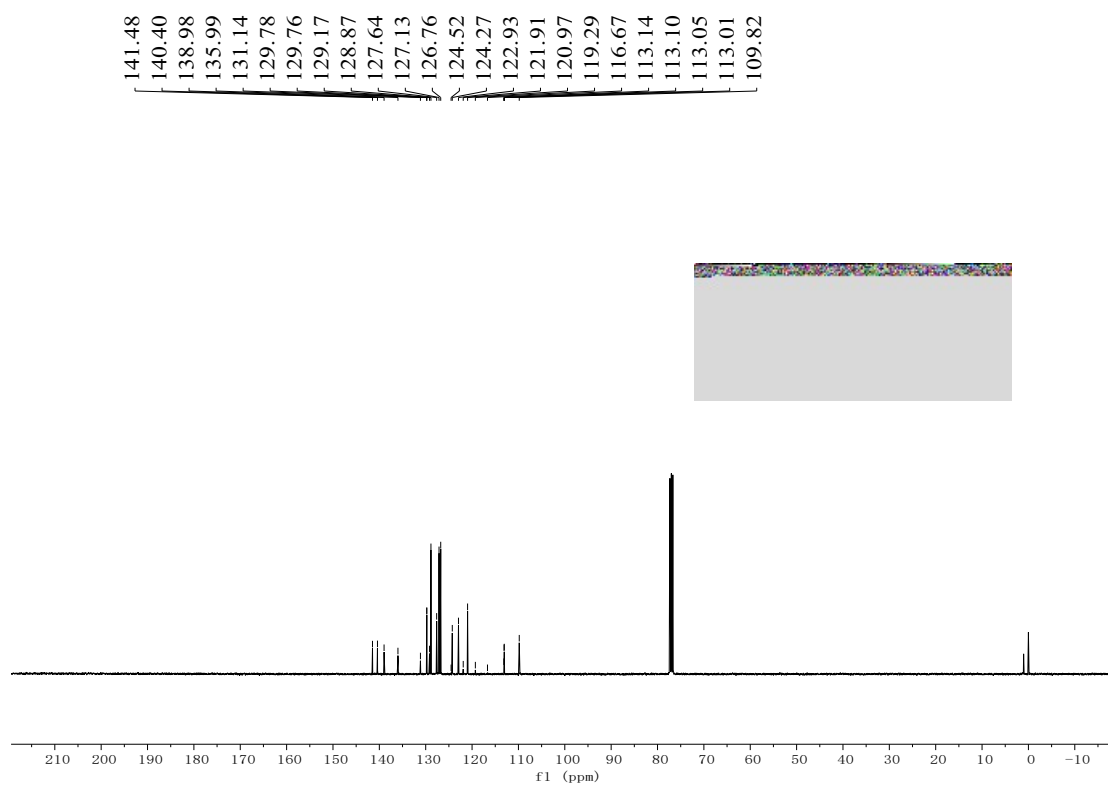

<sup>1</sup>H NMR Spectrum of **3ab'** (400 MHz, CDCl<sub>3</sub>)

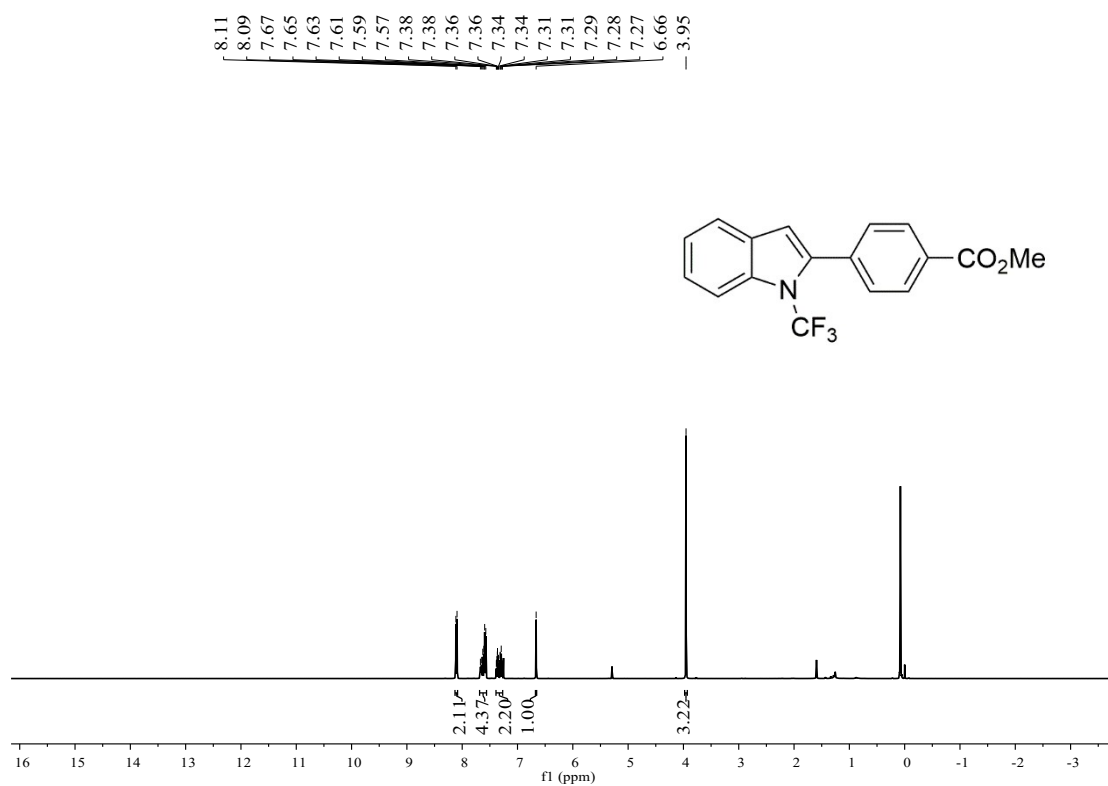

<sup>19</sup>F NMR Spectrum of **3ab'** (376 MHz, CDCl<sub>3</sub>)

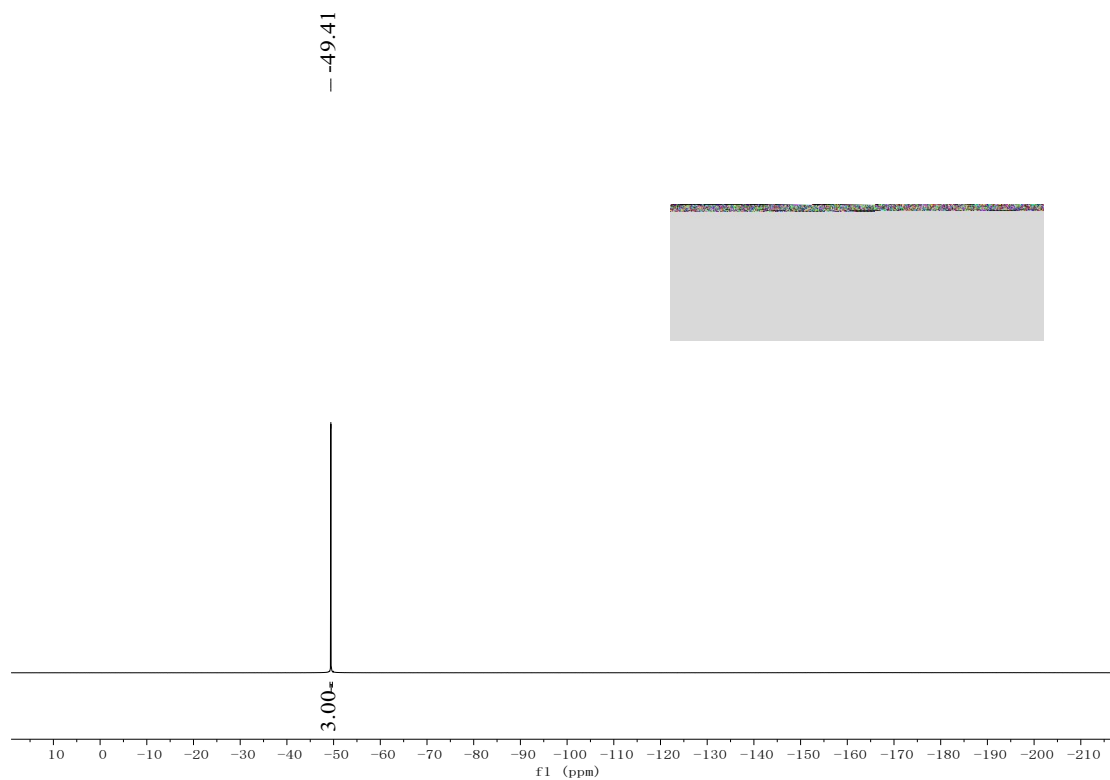

<sup>13</sup>C NMR Spectrum of **3ab'** (101 MHz, CDCl<sub>3</sub>)

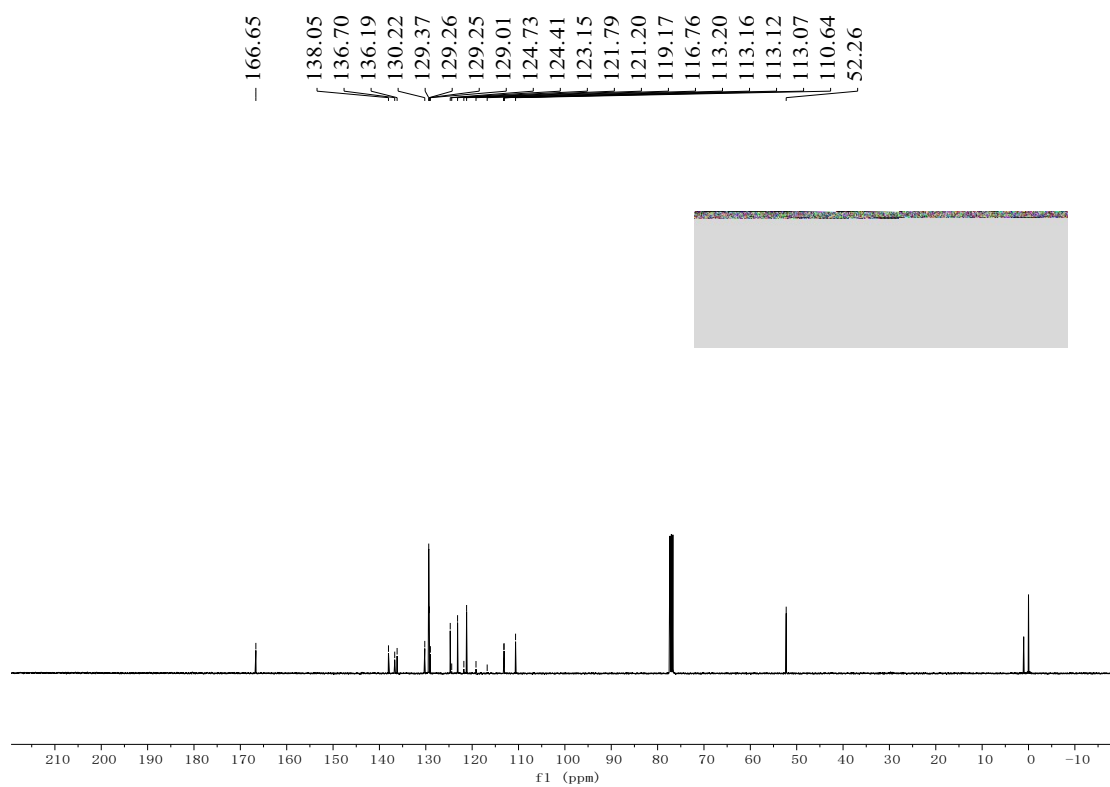

<sup>1</sup>H NMR Spectrum of **3ac'** (400 MHz, CDCl<sub>3</sub>)

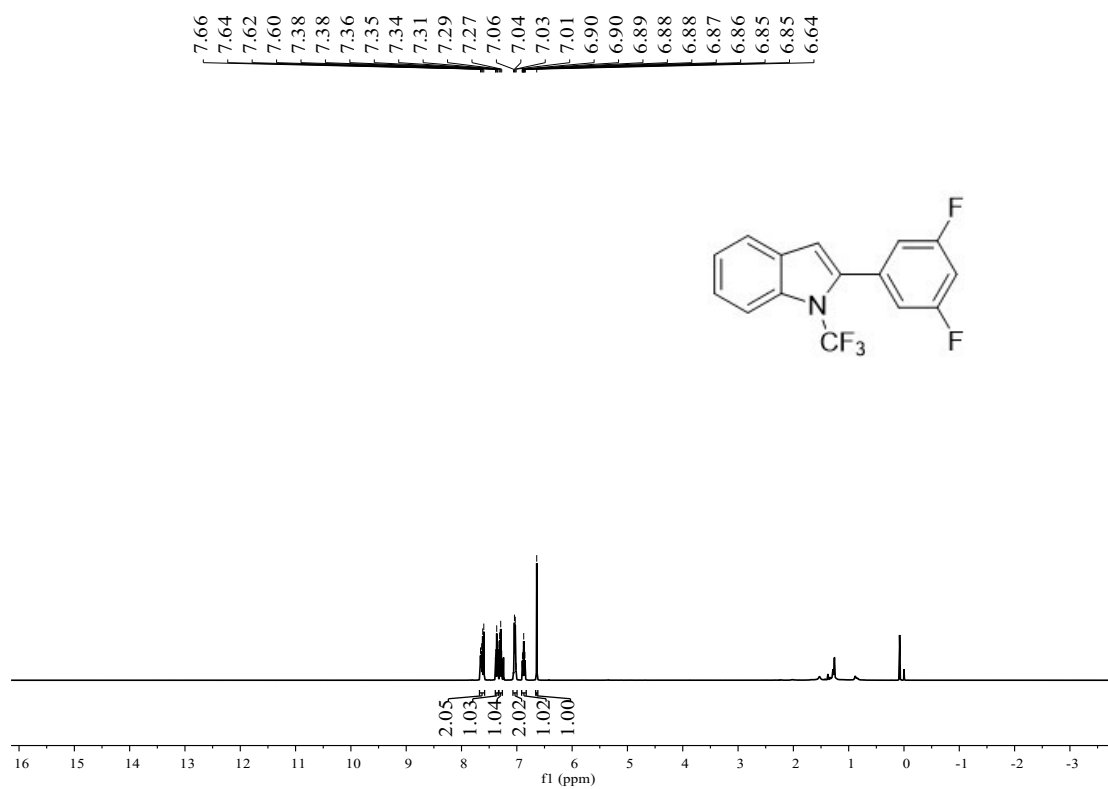

<sup>19</sup>F NMR Spectrum of **3ac'** (376 MHz, CDCl<sub>3</sub>)

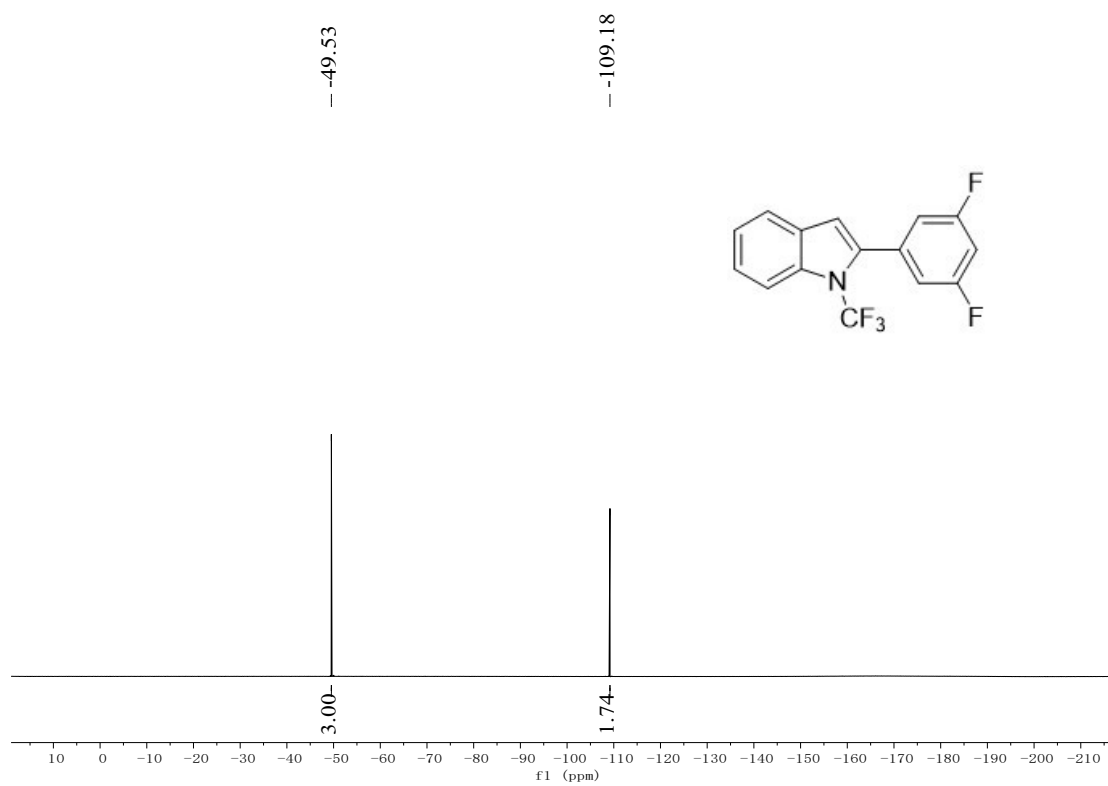

<sup>13</sup>C NMR Spectrum of **3ac'** (101 MHz, CDCl<sub>3</sub>)

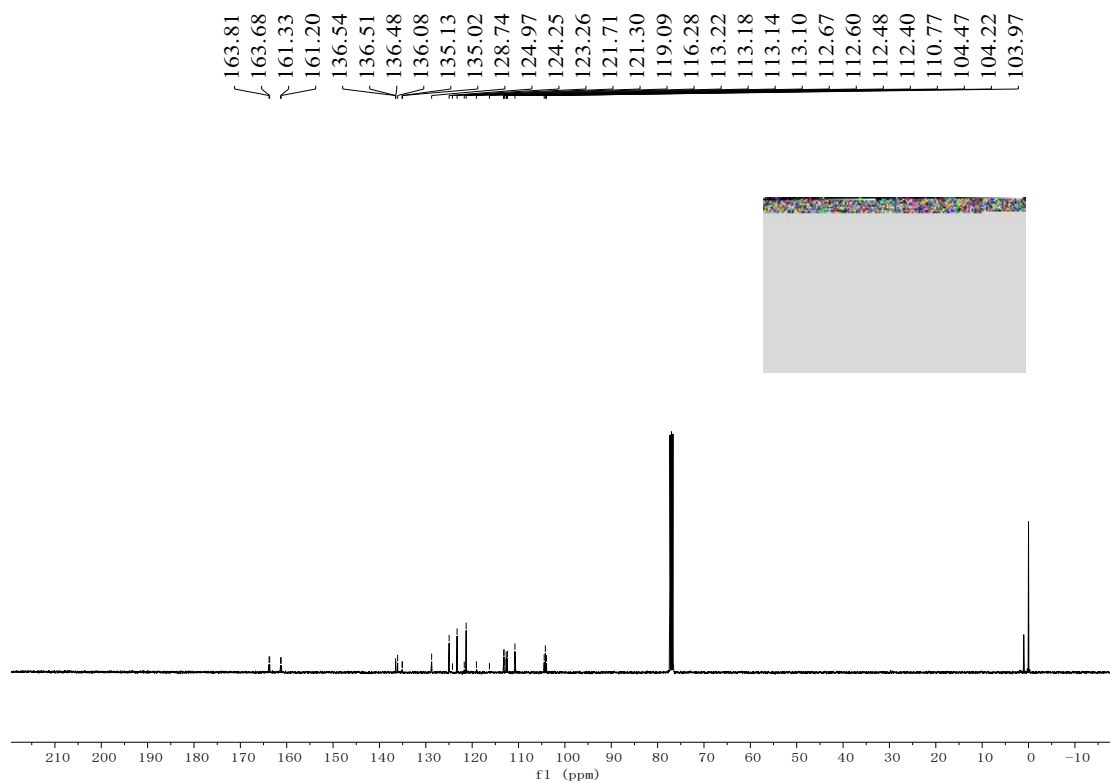

<sup>1</sup>H NMR Spectrum of **3ad'** (400 MHz, CDCl<sub>3</sub>)

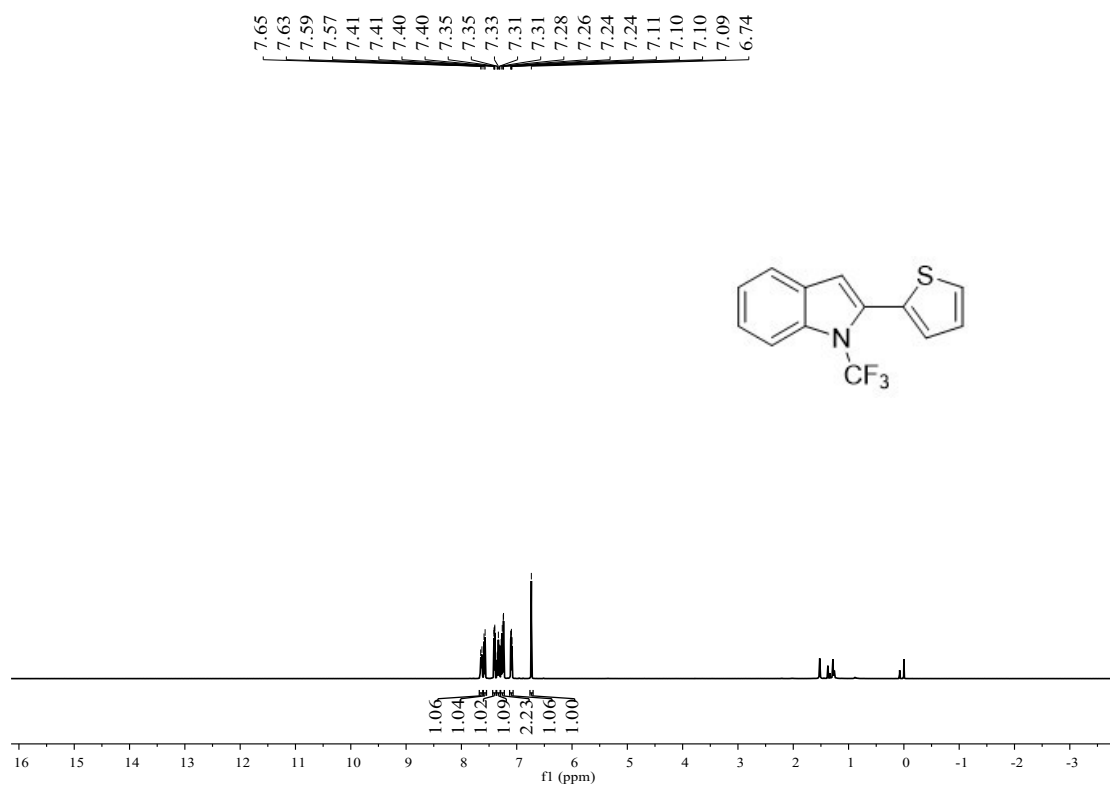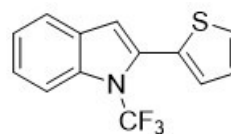

<sup>19</sup>F NMR Spectrum of **3ad'** (376 MHz, CDCl<sub>3</sub>)

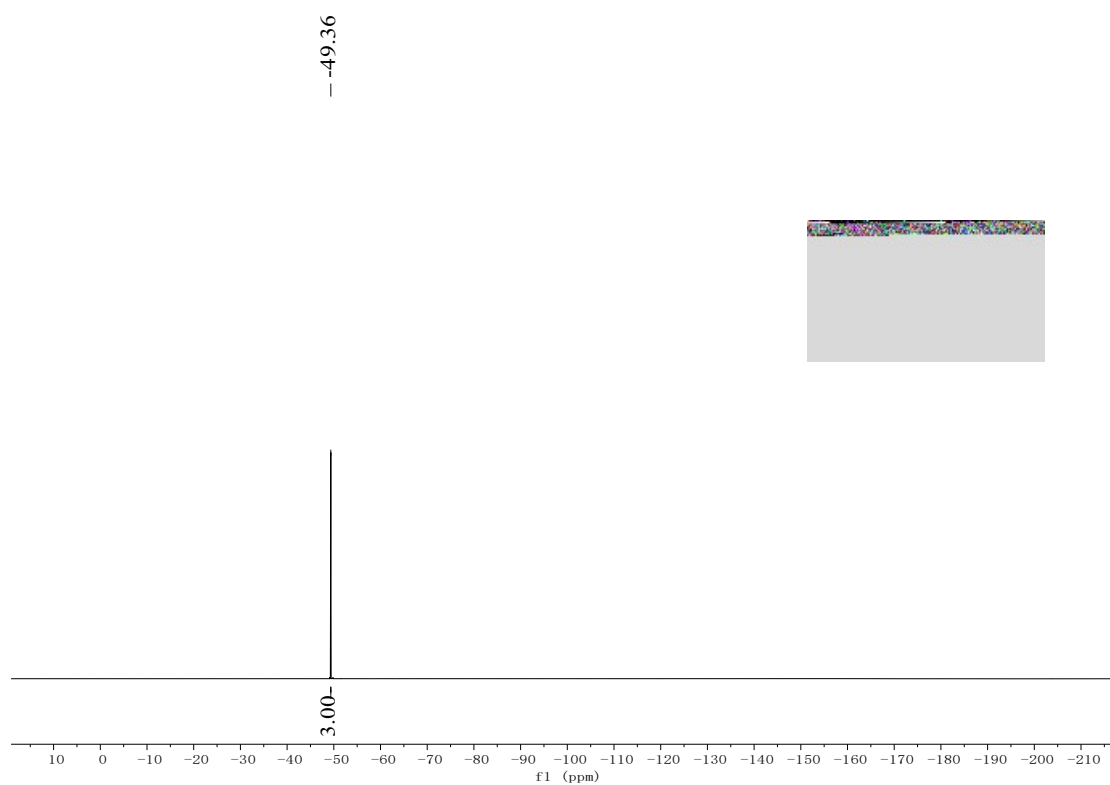

<sup>13</sup>C NMR Spectrum of **3ad'** (101 MHz, CDCl<sub>3</sub>)

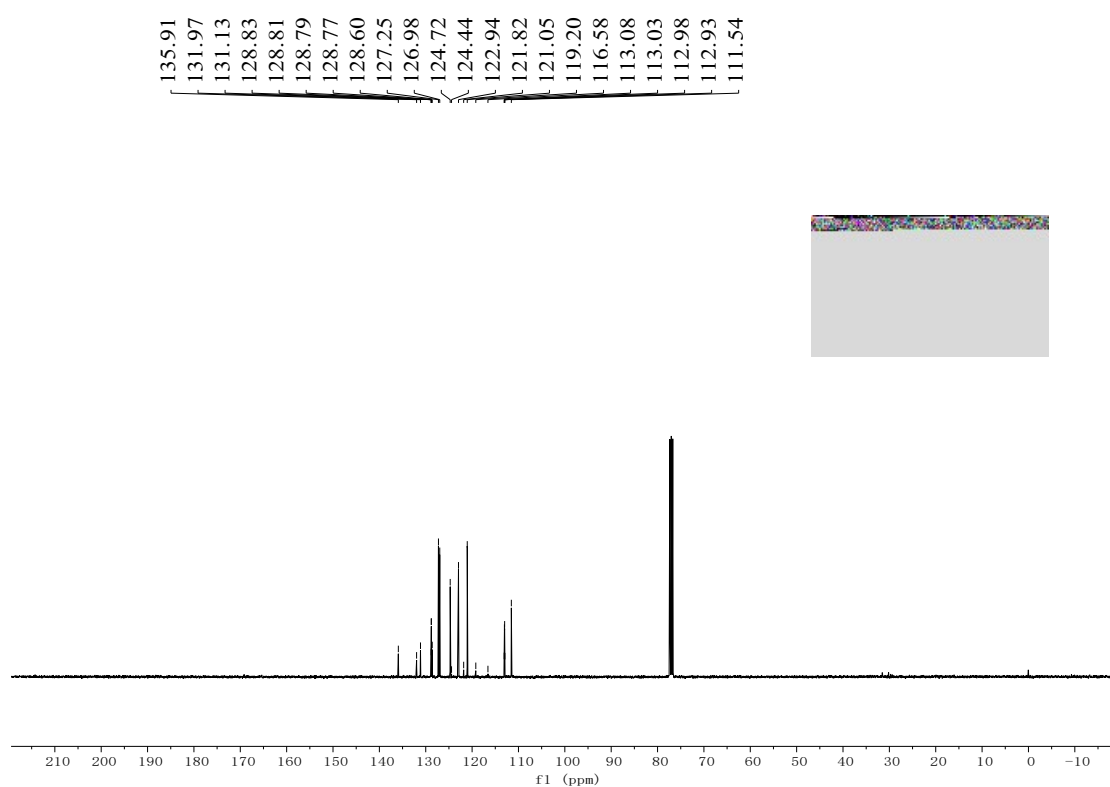

<sup>1</sup>H NMR Spectrum of **3ae'** (400 MHz, CDCl<sub>3</sub>)

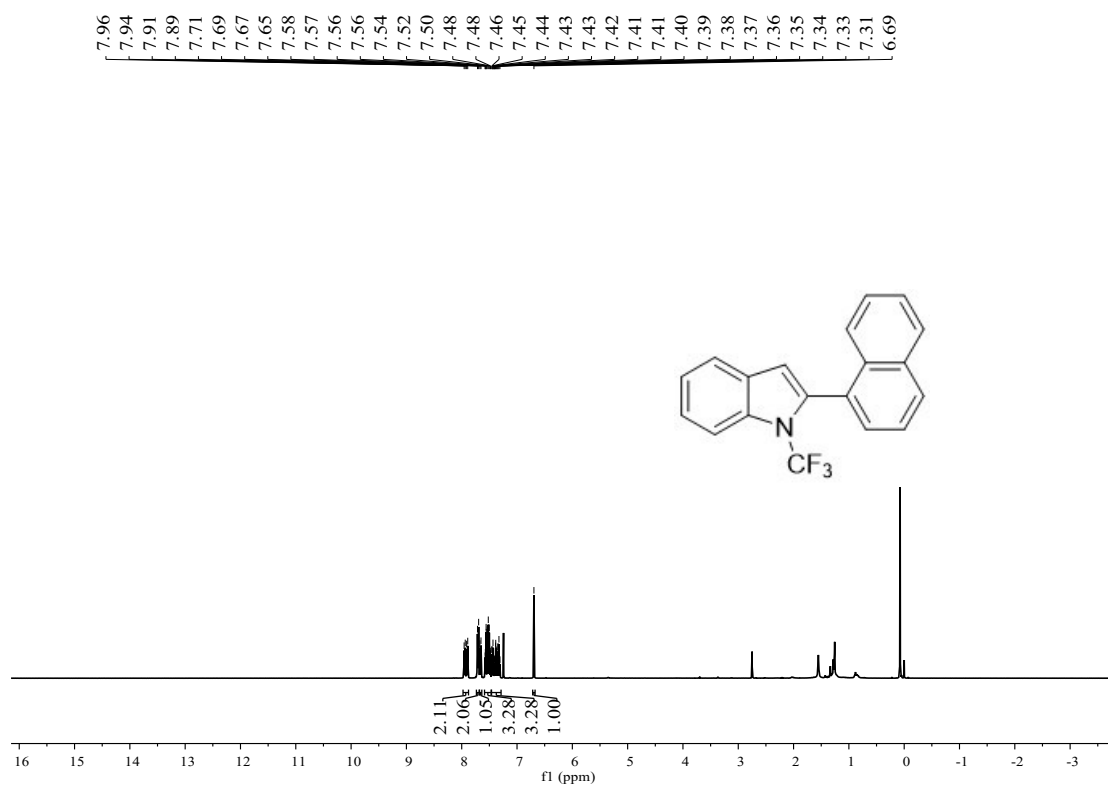

<sup>19</sup>F NMR Spectrum of **3ae'** (376 MHz, CDCl<sub>3</sub>)

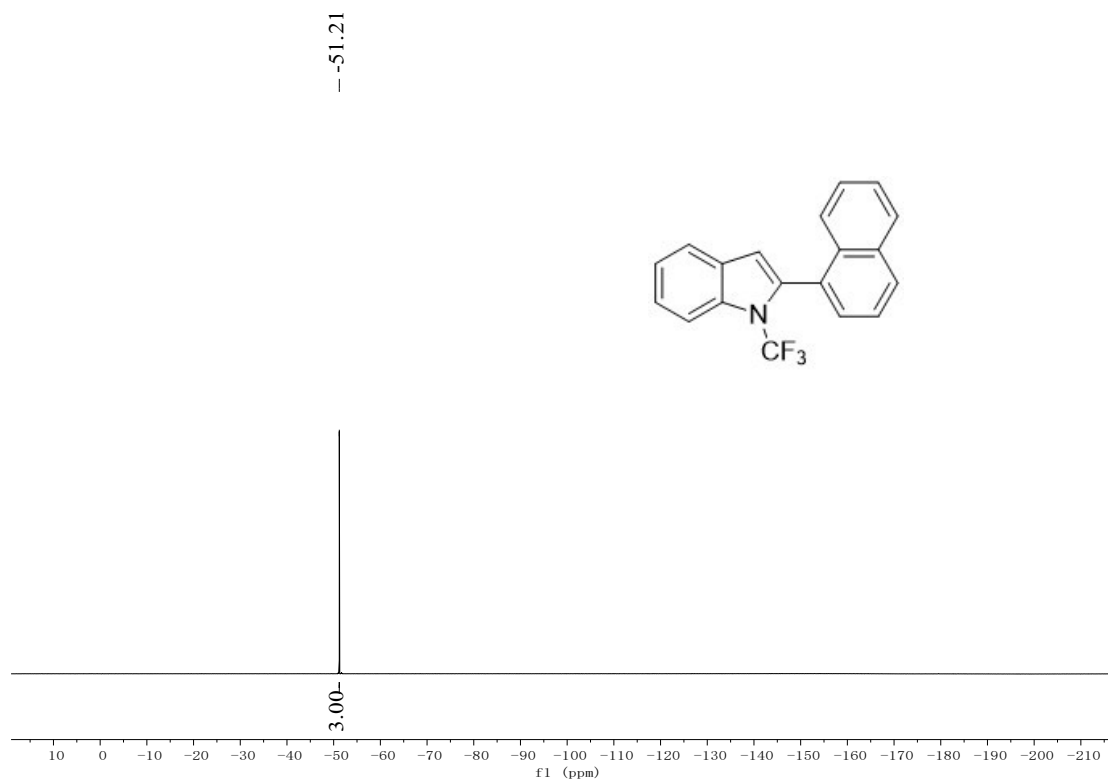

<sup>13</sup>C NMR Spectrum of **3ae'** (101 MHz, CDCl<sub>3</sub>)

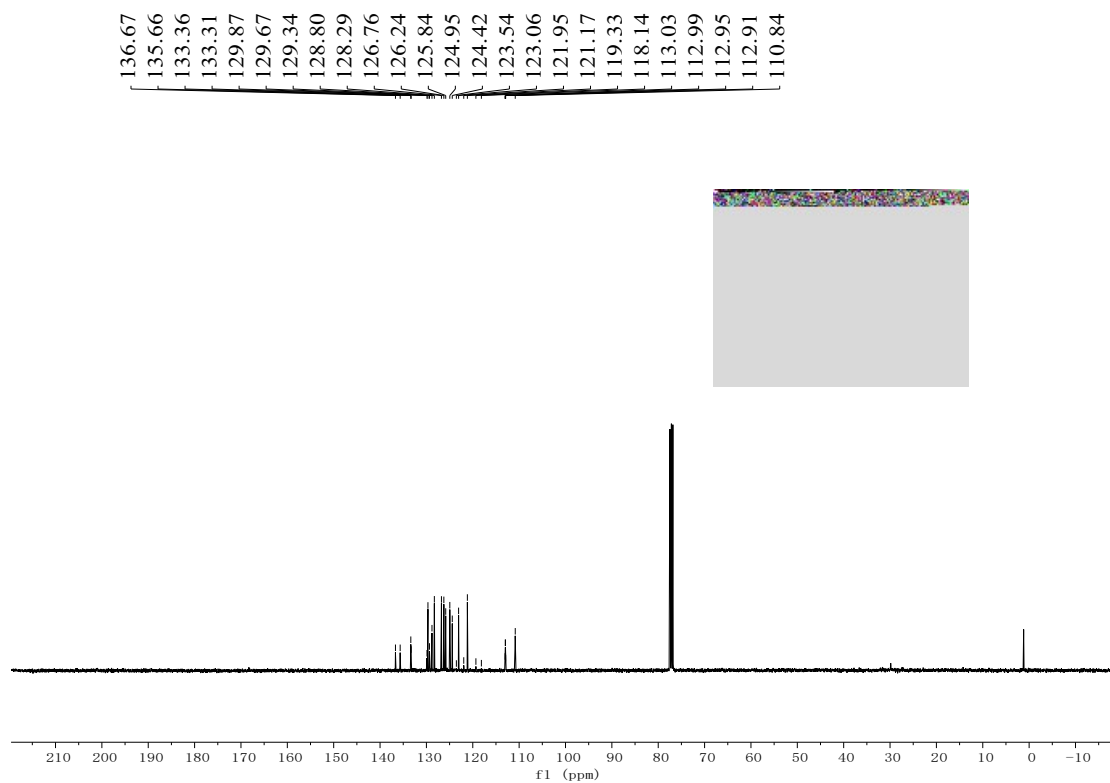

<sup>1</sup>H NMR Spectrum of **3af'** (400 MHz, CDCl<sub>3</sub>)

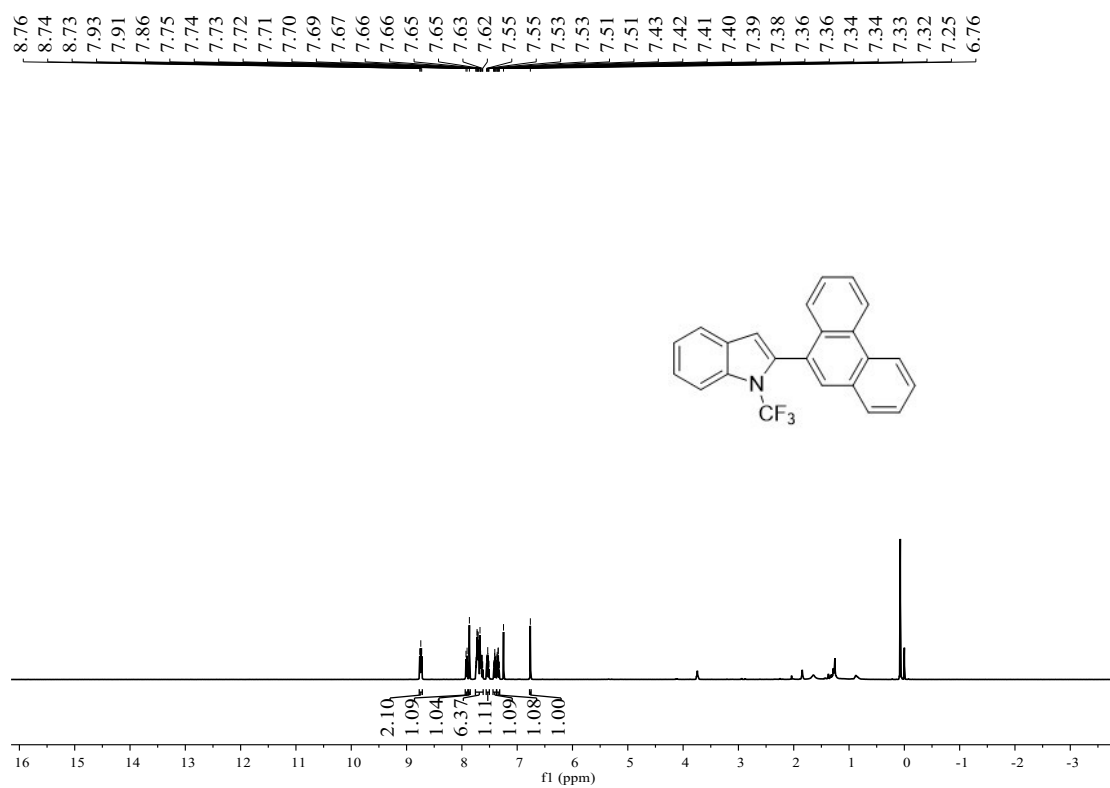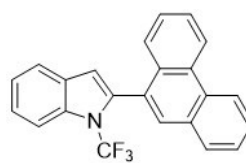



<sup>19</sup>F NMR Spectrum of **3af'** (376 MHz, CDCl<sub>3</sub>)

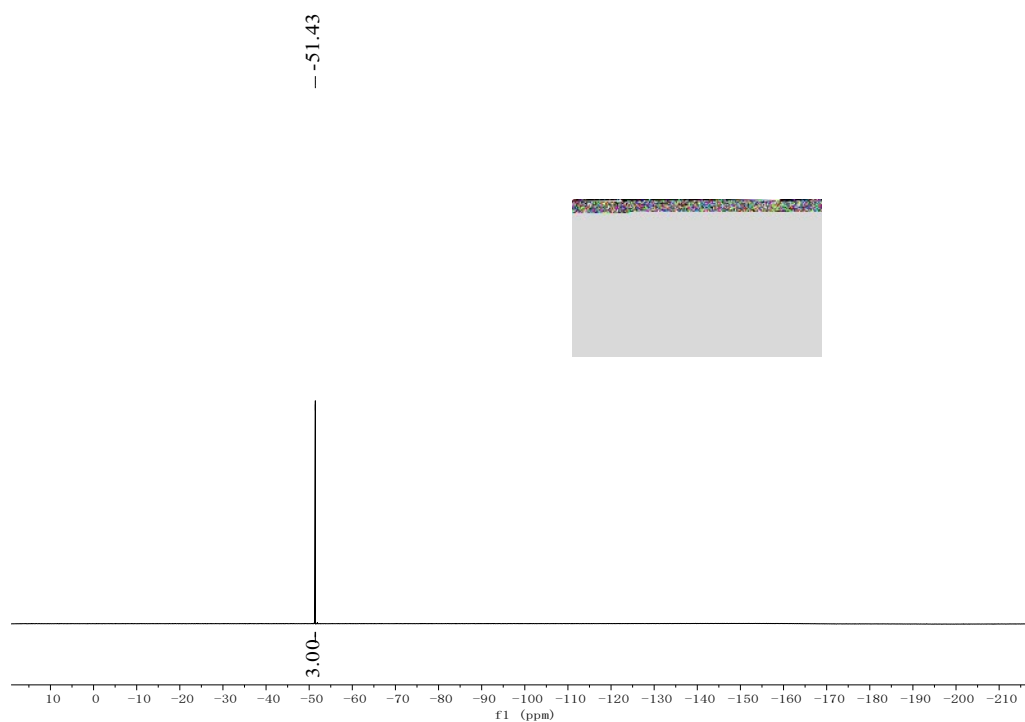

<sup>13</sup>C NMR Spectrum of **3af'** (101 MHz, CDCl<sub>3</sub>)

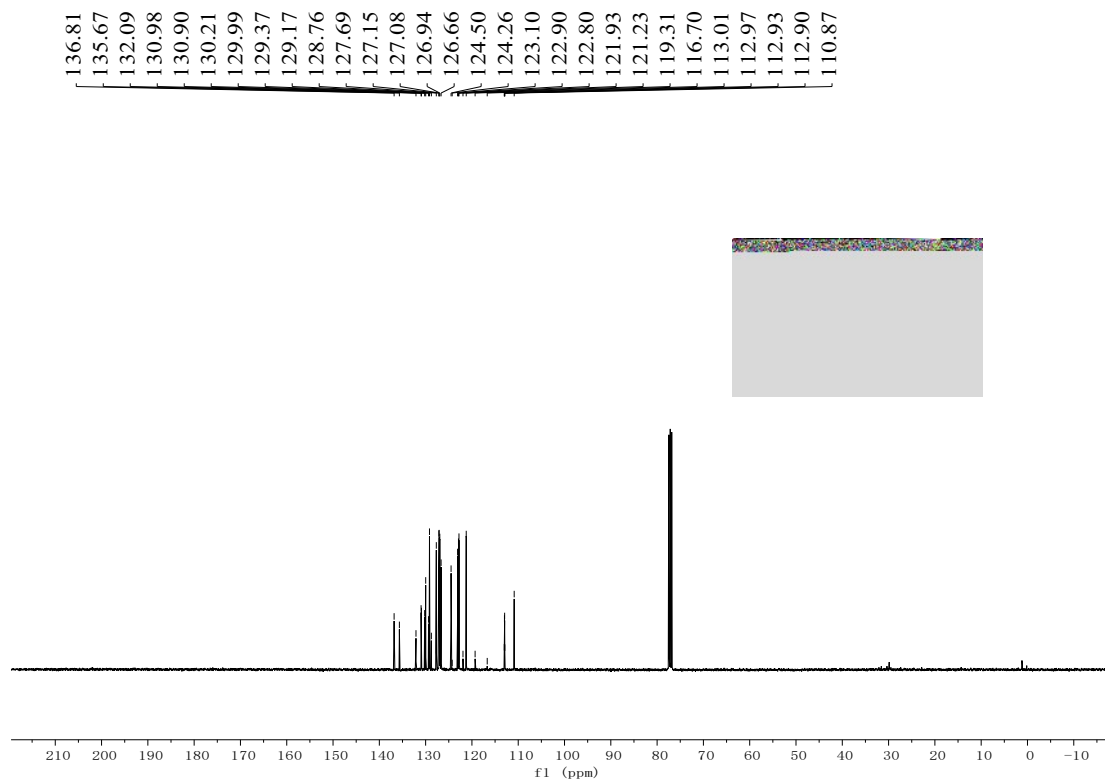

<sup>1</sup>H NMR Spectrum of **3ag'** (400 MHz, CDCl<sub>3</sub>)

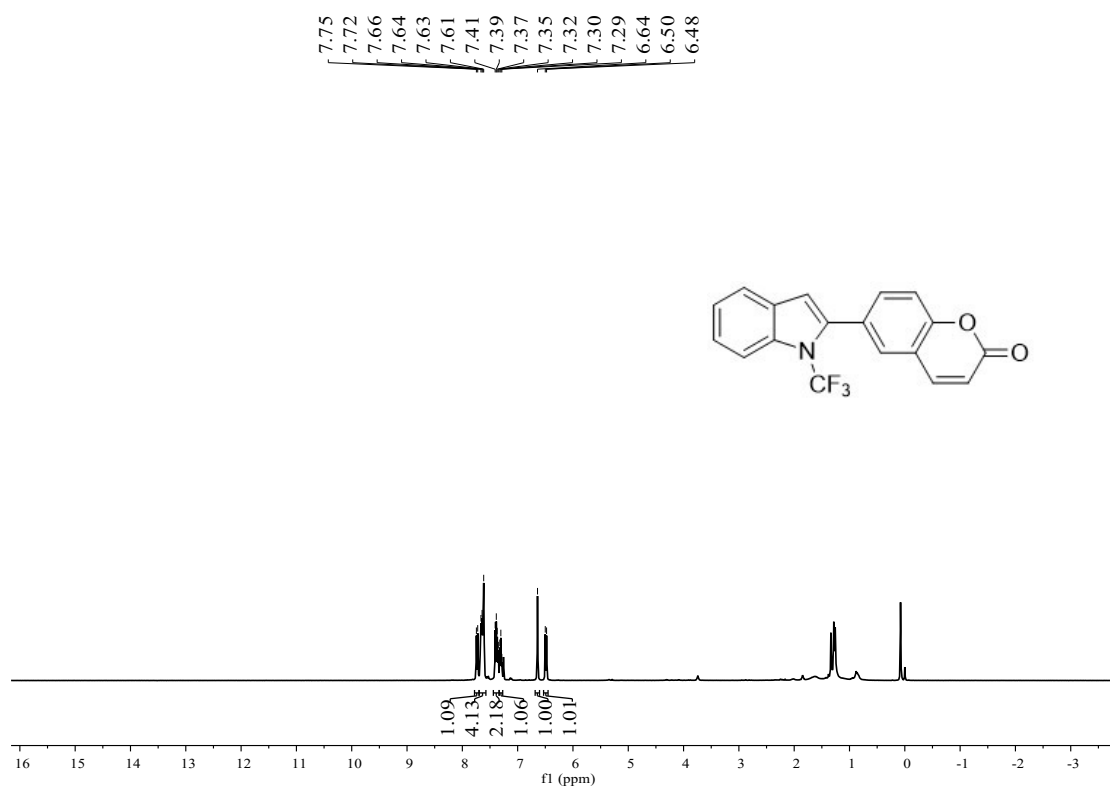

<sup>19</sup>F NMR Spectrum of **3ag'** (376 MHz, CDCl<sub>3</sub>)

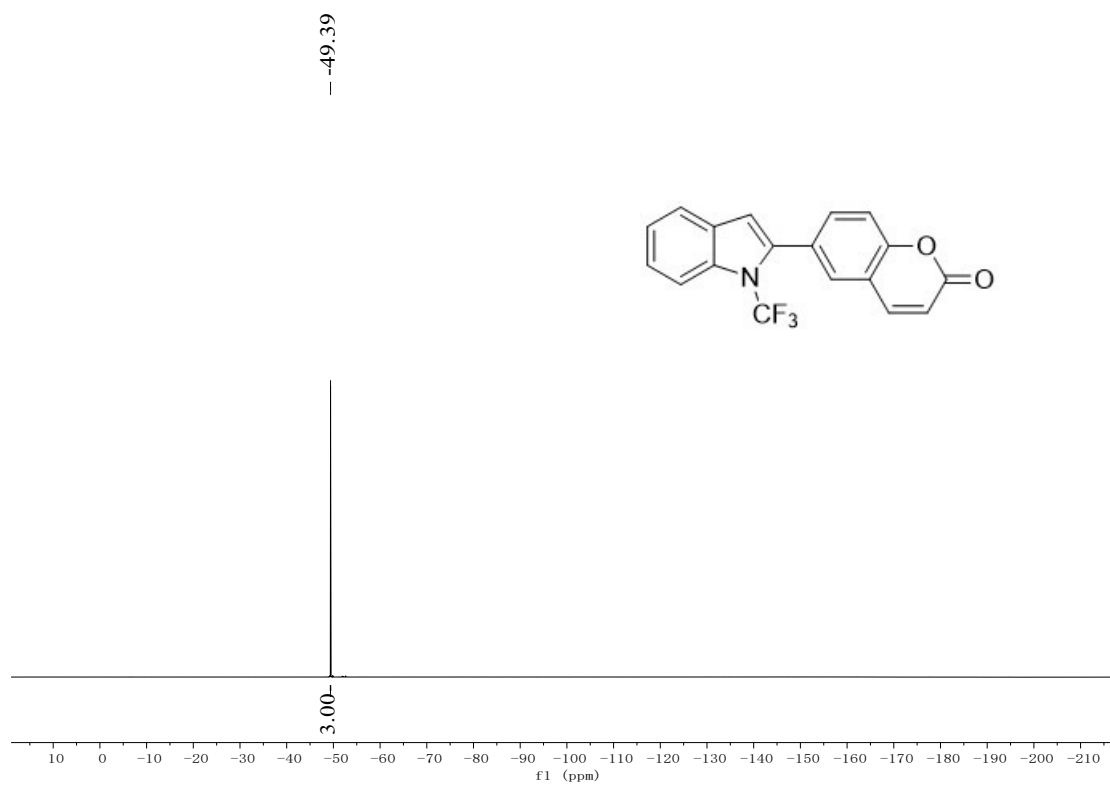

<sup>13</sup>C NMR Spectrum of **3ag'** (101 MHz, CDCl<sub>3</sub>)

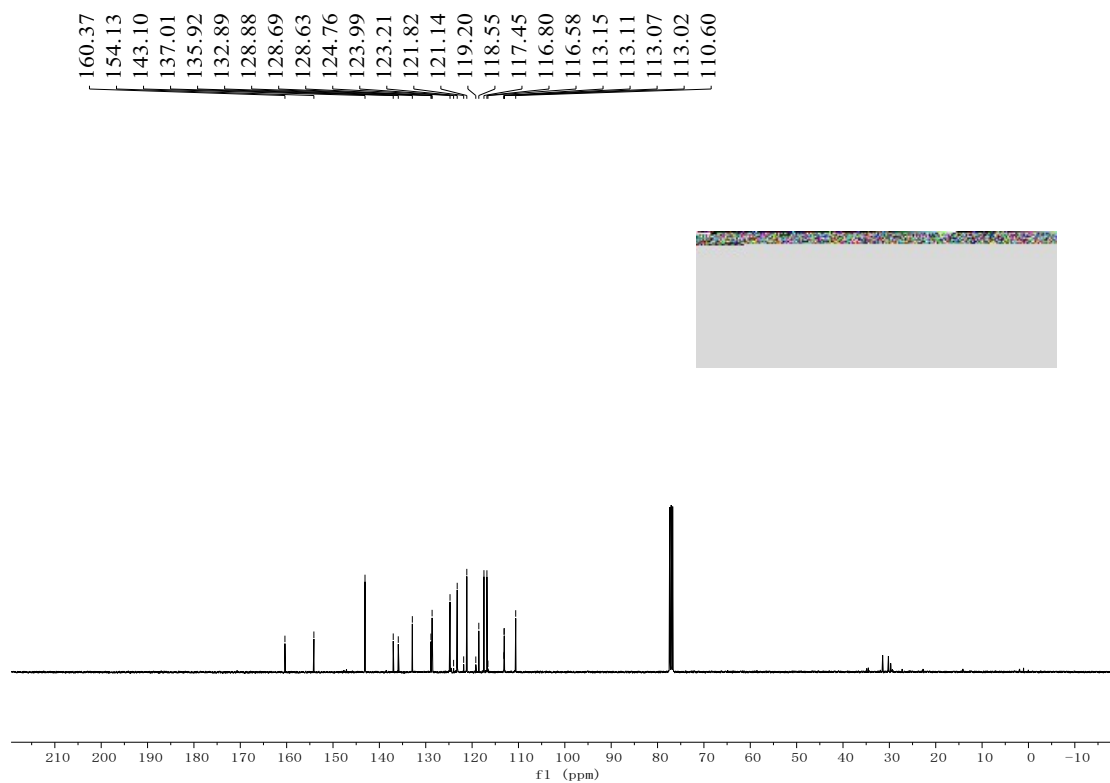

<sup>1</sup>H NMR Spectrum of **3ba** (400 MHz, CDCl<sub>3</sub>)

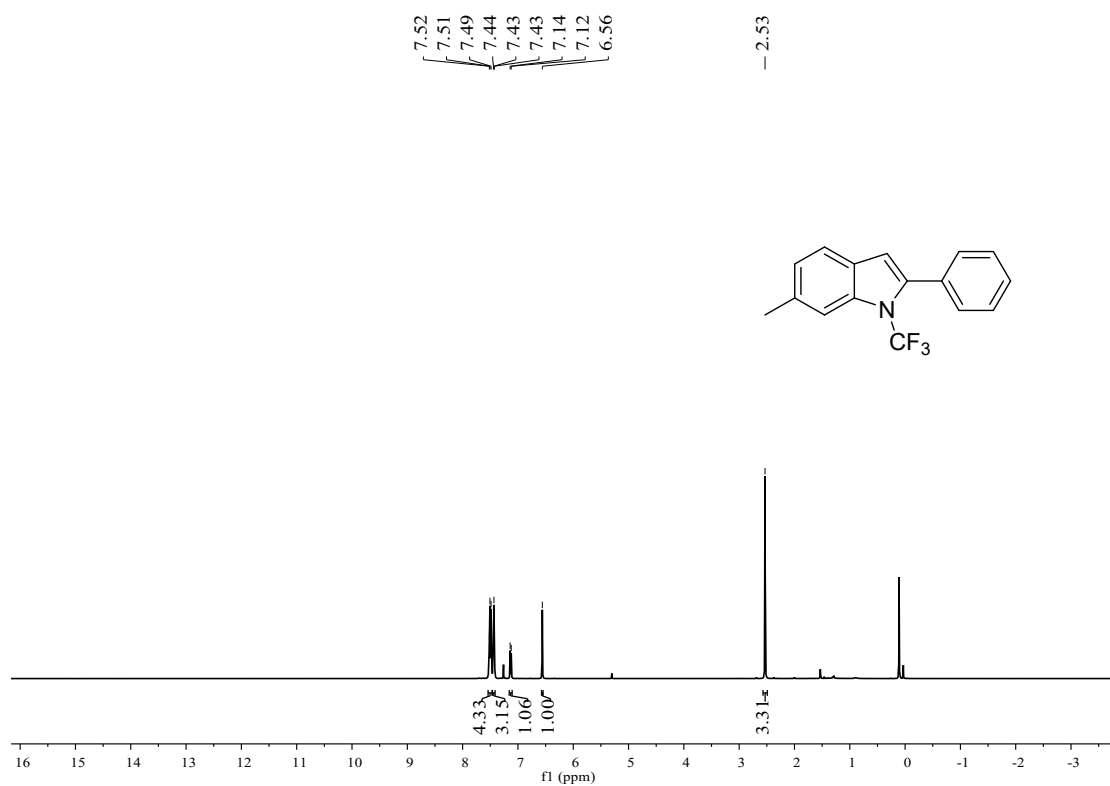

<sup>19</sup>F NMR Spectrum of **3ba** (376 MHz, CDCl<sub>3</sub>)

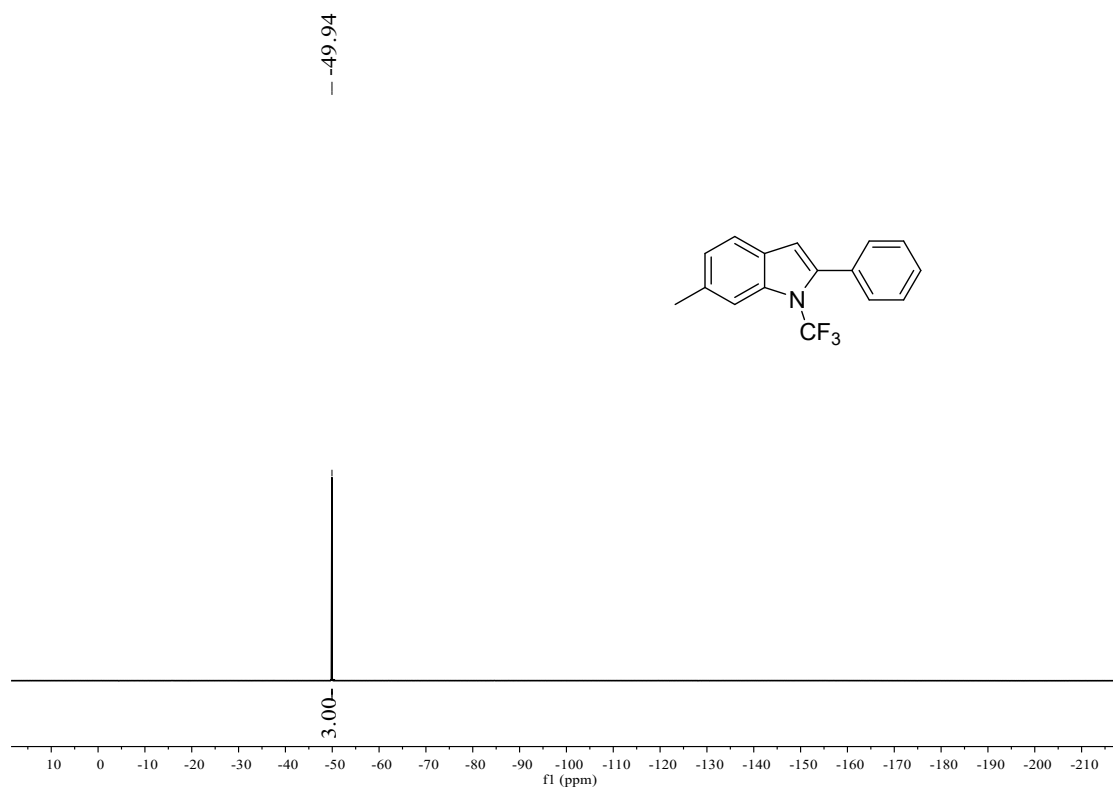

<sup>13</sup>C NMR Spectrum of **3ba** (101 MHz, CDCl<sub>3</sub>)

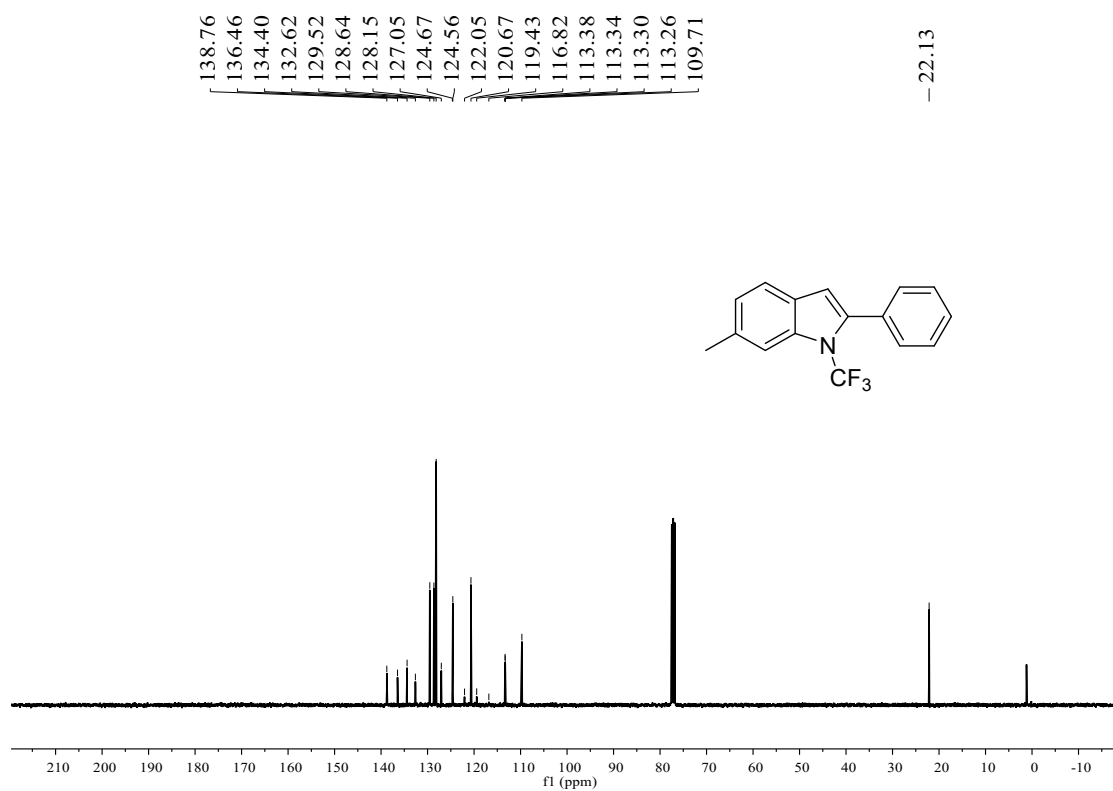

<sup>1</sup>H NMR Spectrum of **3bb** (400 MHz, CDCl<sub>3</sub>)

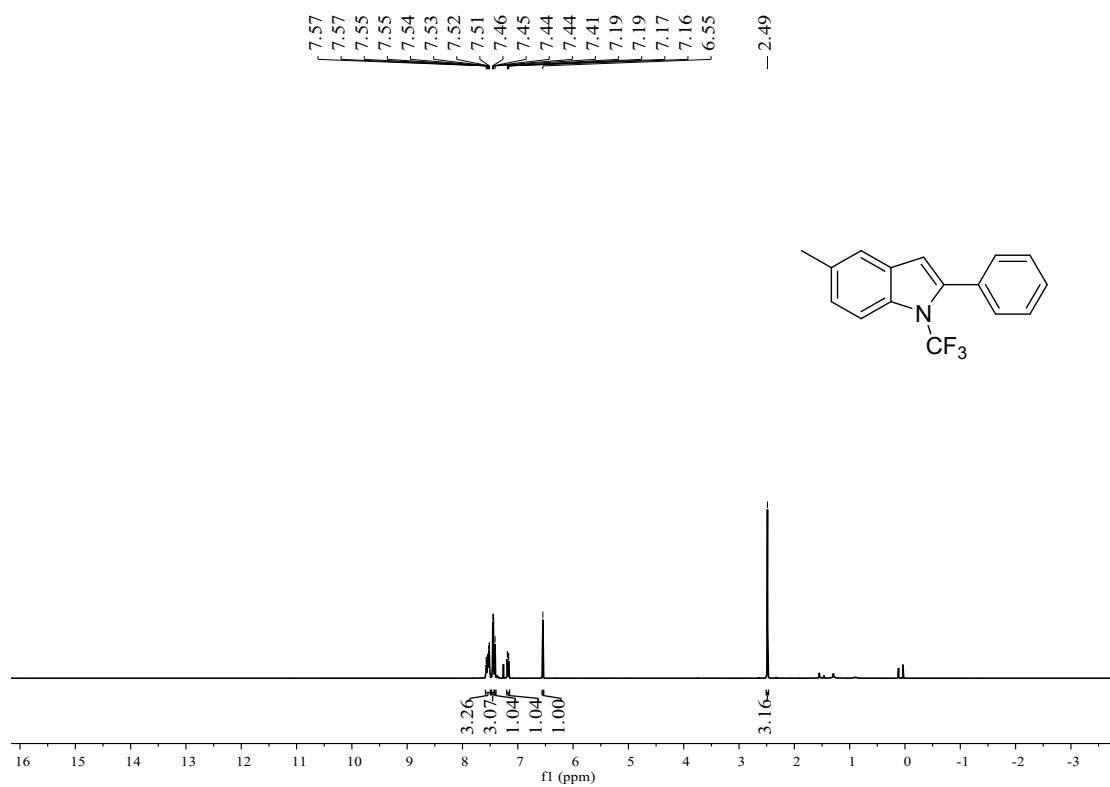

<sup>19</sup>F NMR Spectrum of **3bb** (376 MHz, CDCl<sub>3</sub>)

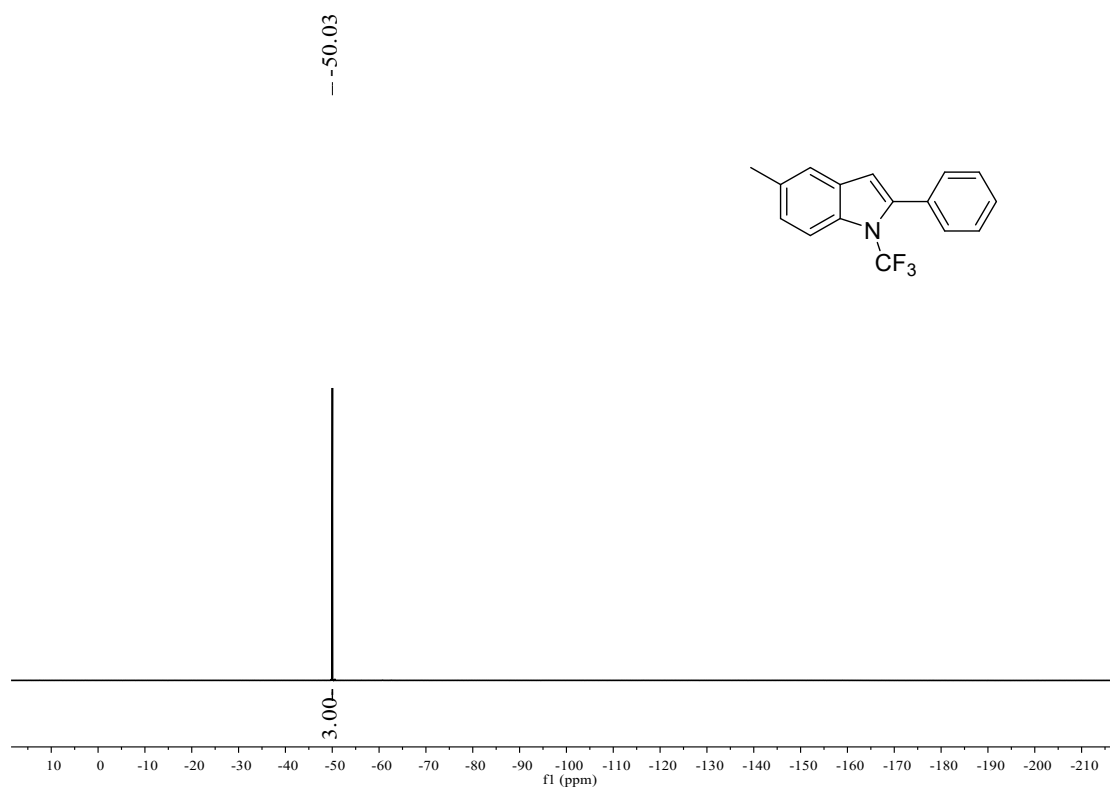

<sup>13</sup>C NMR Spectrum of **3bb** (101 MHz, CDCl<sub>3</sub>)

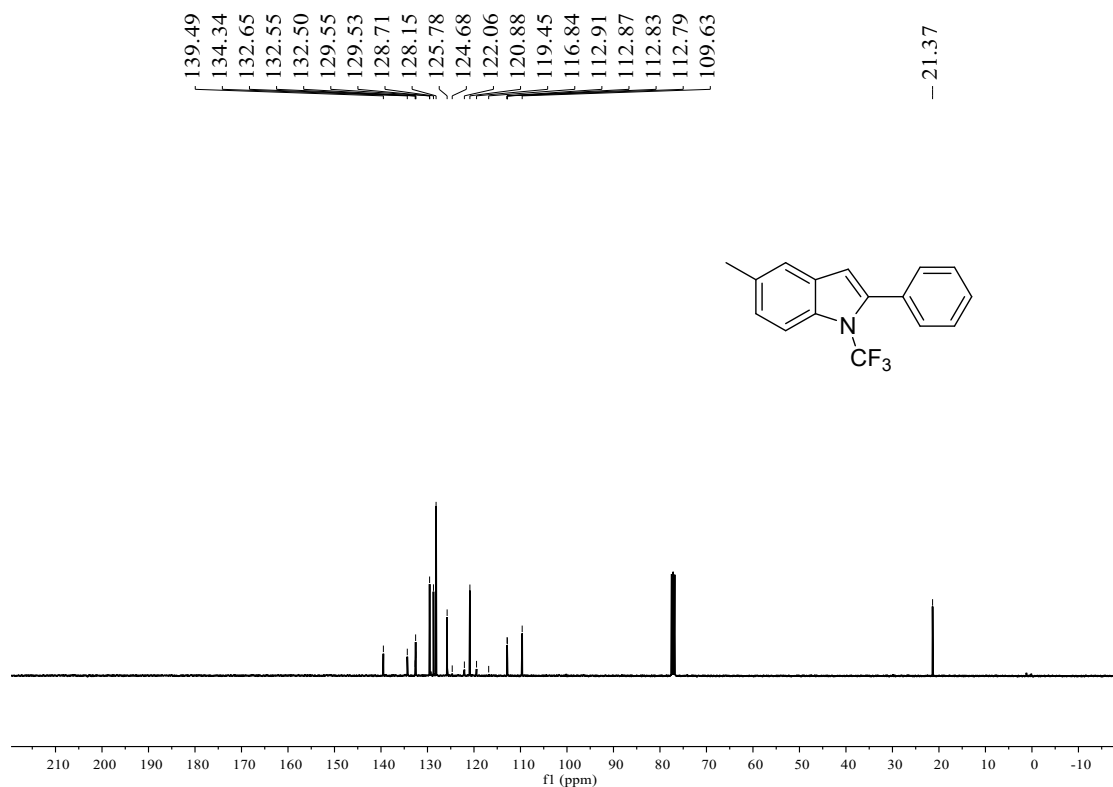

<sup>1</sup>H NMR Spectrum of **3bc** (400 MHz, CDCl<sub>3</sub>)

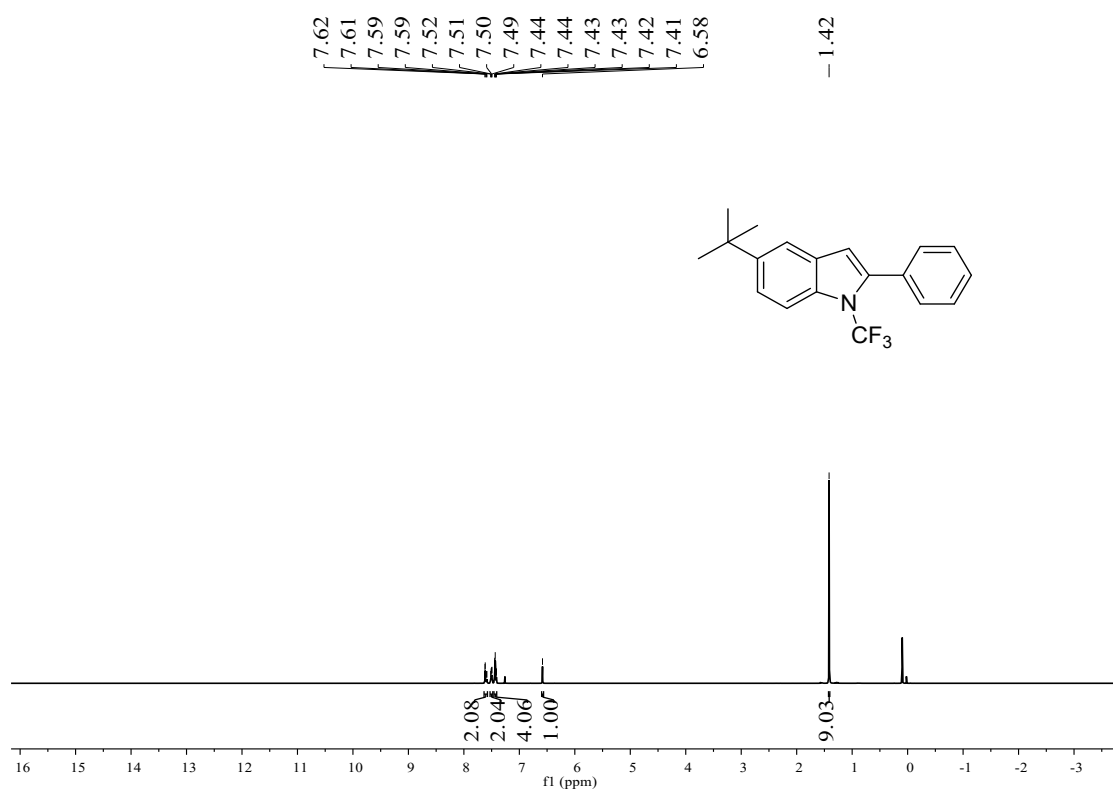

<sup>19</sup>F NMR Spectrum of **3bc** (376 MHz, CDCl<sub>3</sub>)

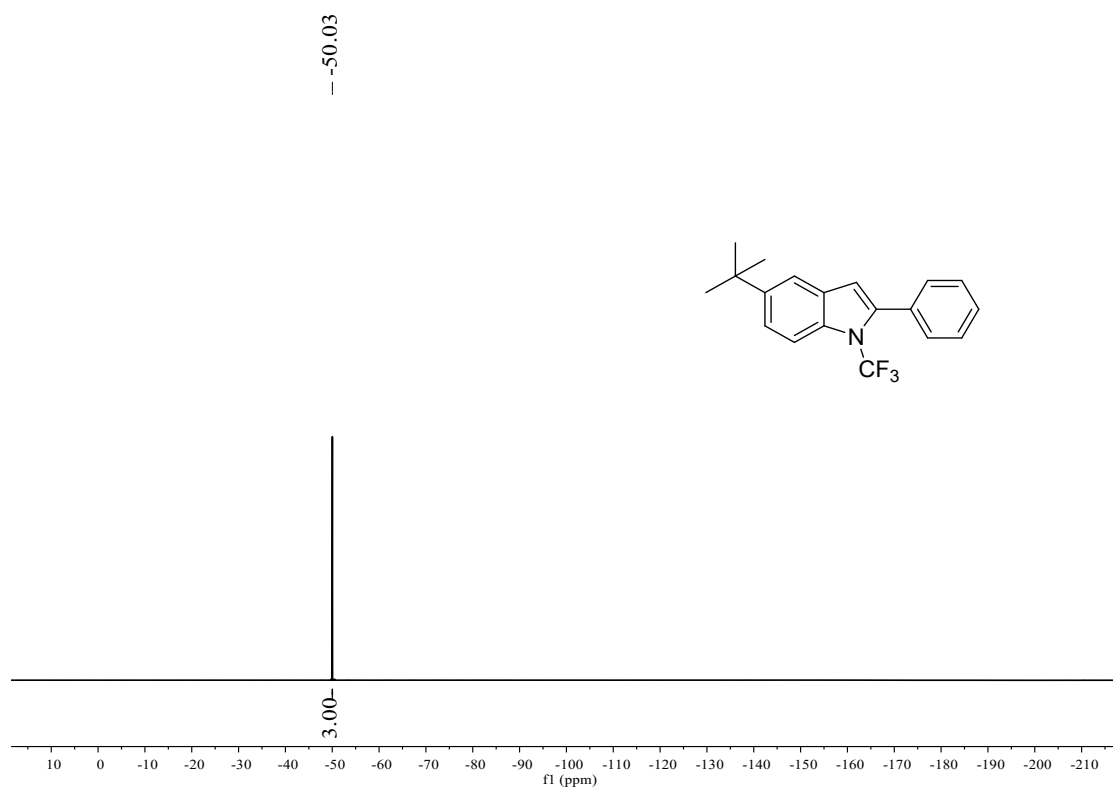

<sup>13</sup>C NMR Spectrum of **3bc** (101 MHz, CDCl<sub>3</sub>)

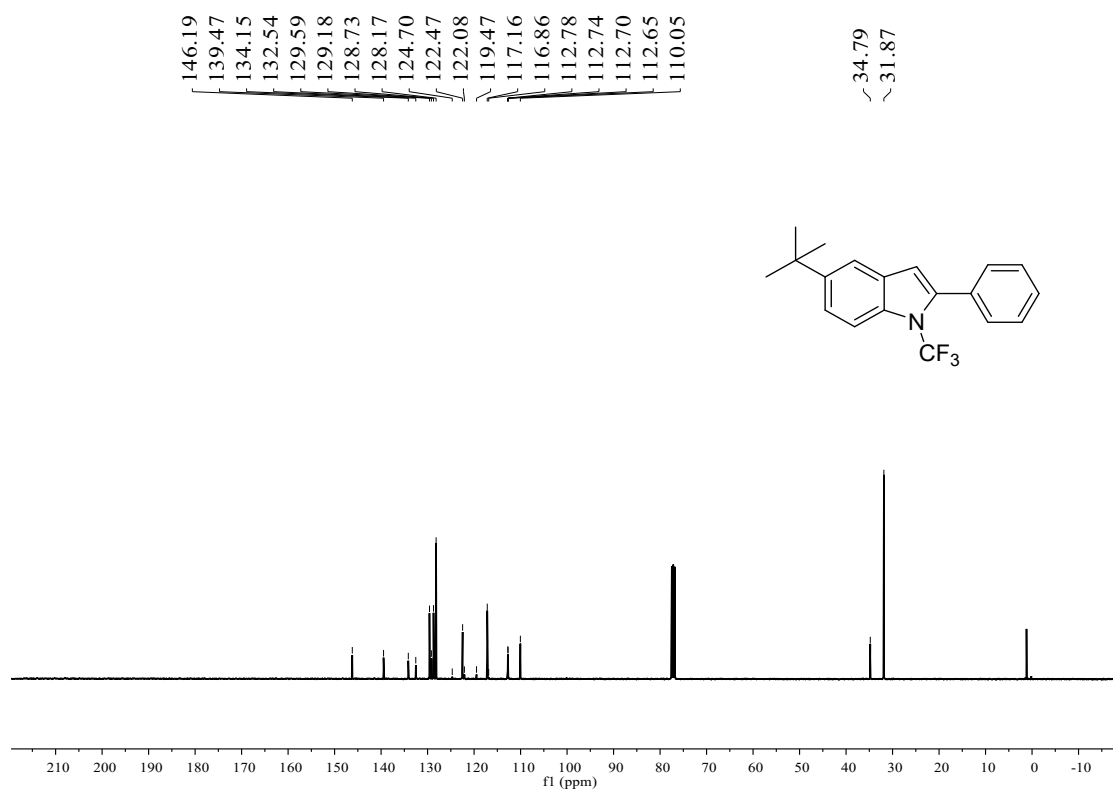

<sup>1</sup>H NMR Spectrum of **3bd** (400 MHz, CDCl<sub>3</sub>)

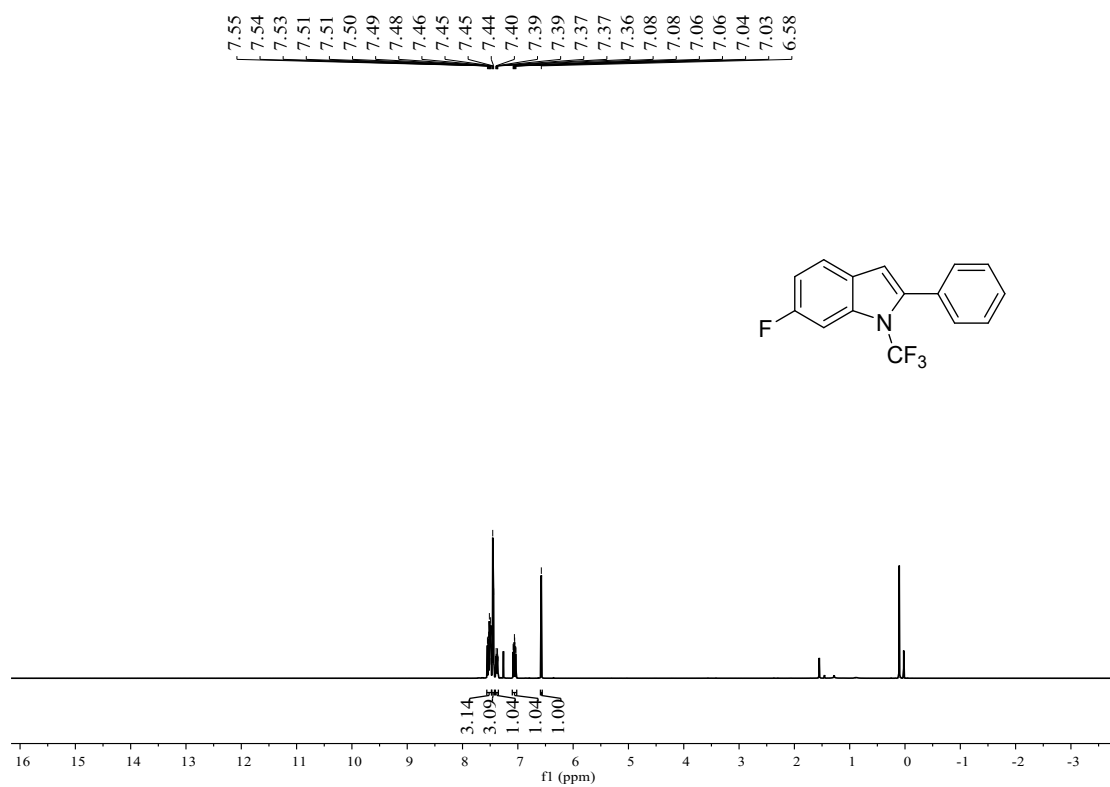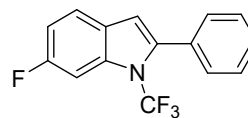

<sup>19</sup>F NMR Spectrum of **3bd** (376 MHz, CDCl<sub>3</sub>)

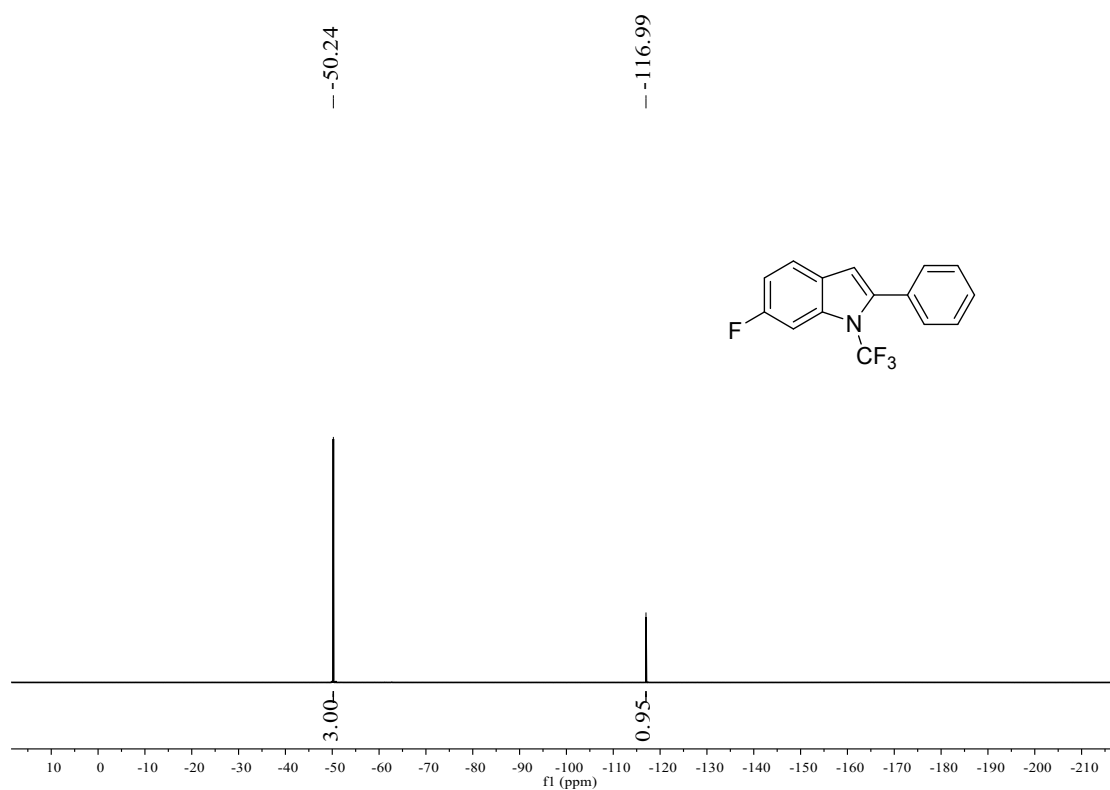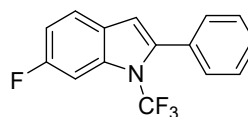



<sup>13</sup>C NMR Spectrum of **3bd** (101 MHz, CDCl<sub>3</sub>)

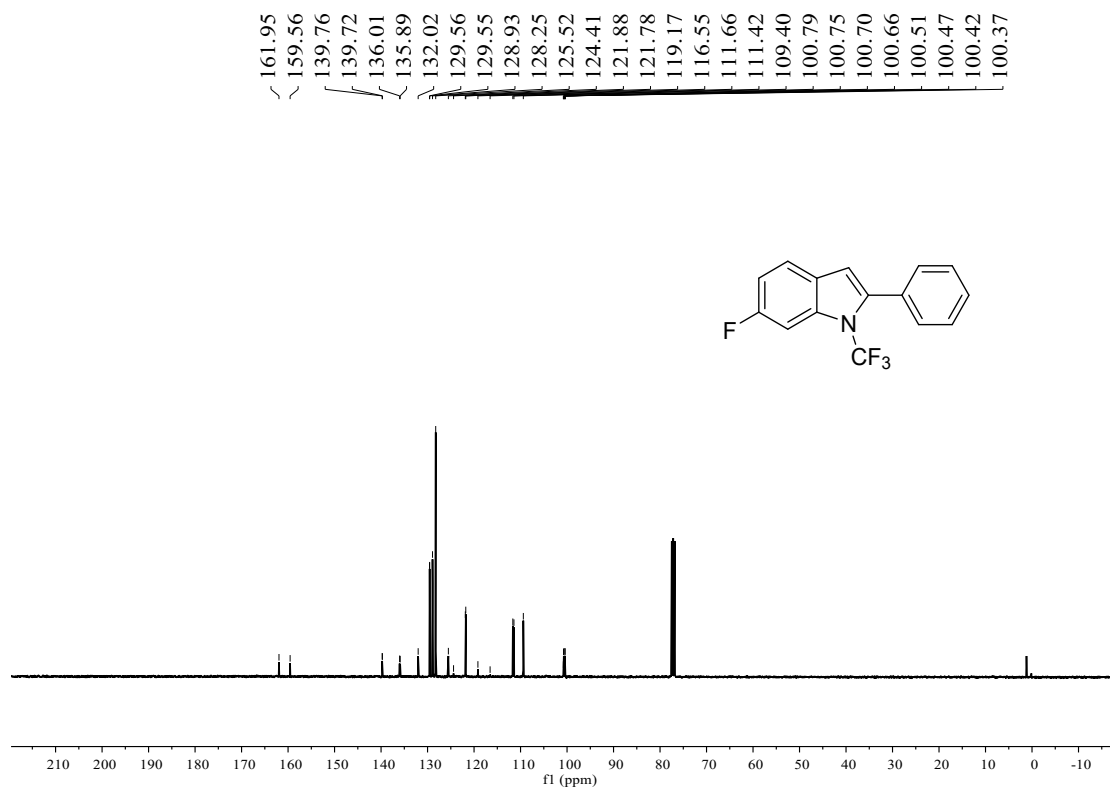

<sup>1</sup>H NMR Spectrum of **3be** (400 MHz, CDCl<sub>3</sub>)

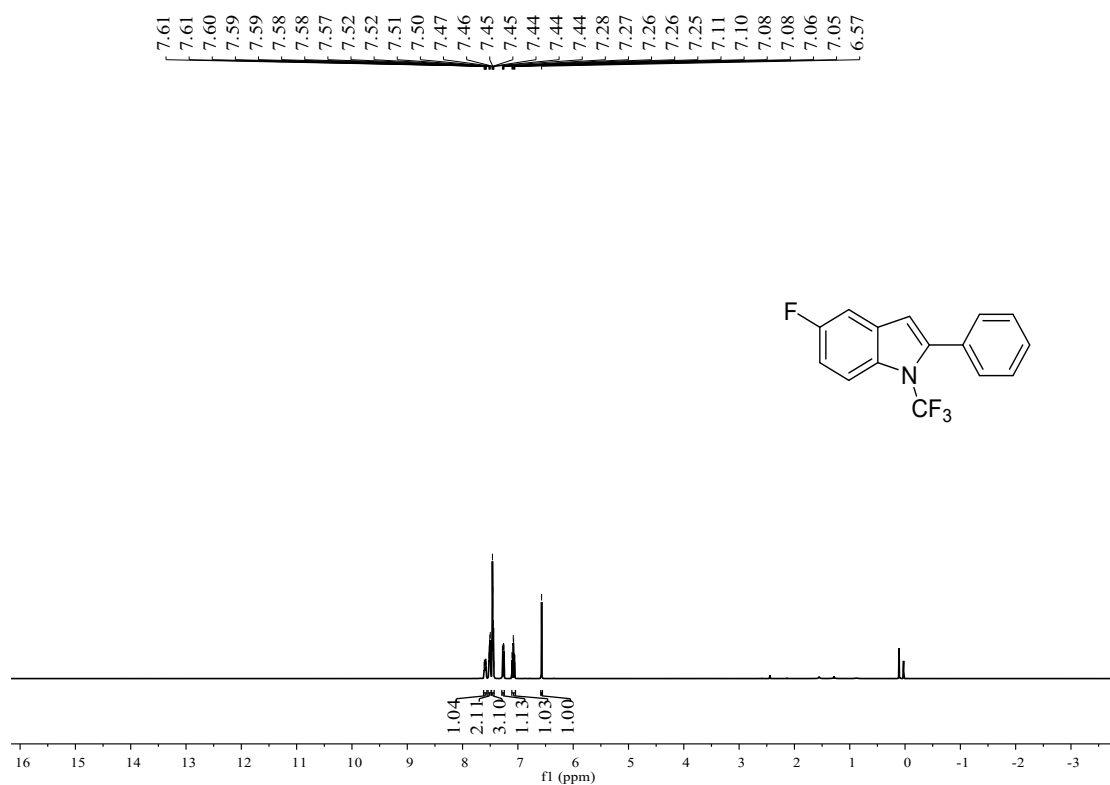

<sup>19</sup>F NMR Spectrum of **3be** (376 MHz, CDCl<sub>3</sub>)

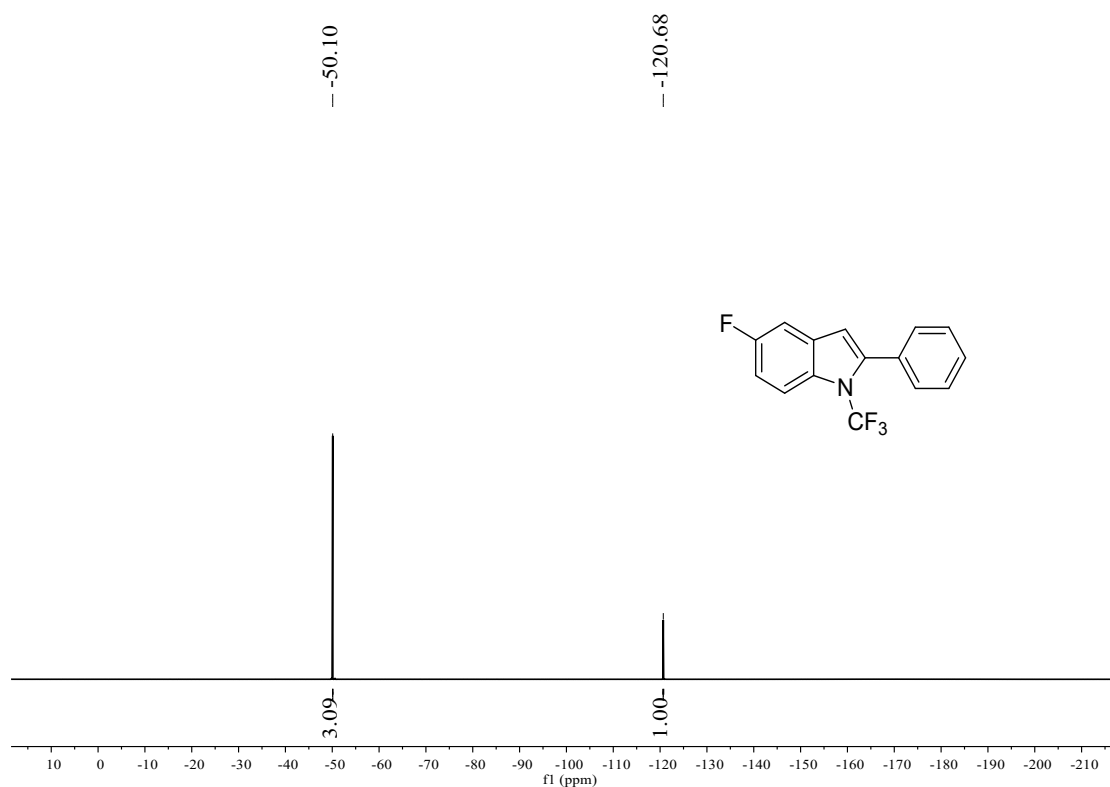

<sup>13</sup>C NMR Spectrum of **3be** (101 MHz, CDCl<sub>3</sub>)

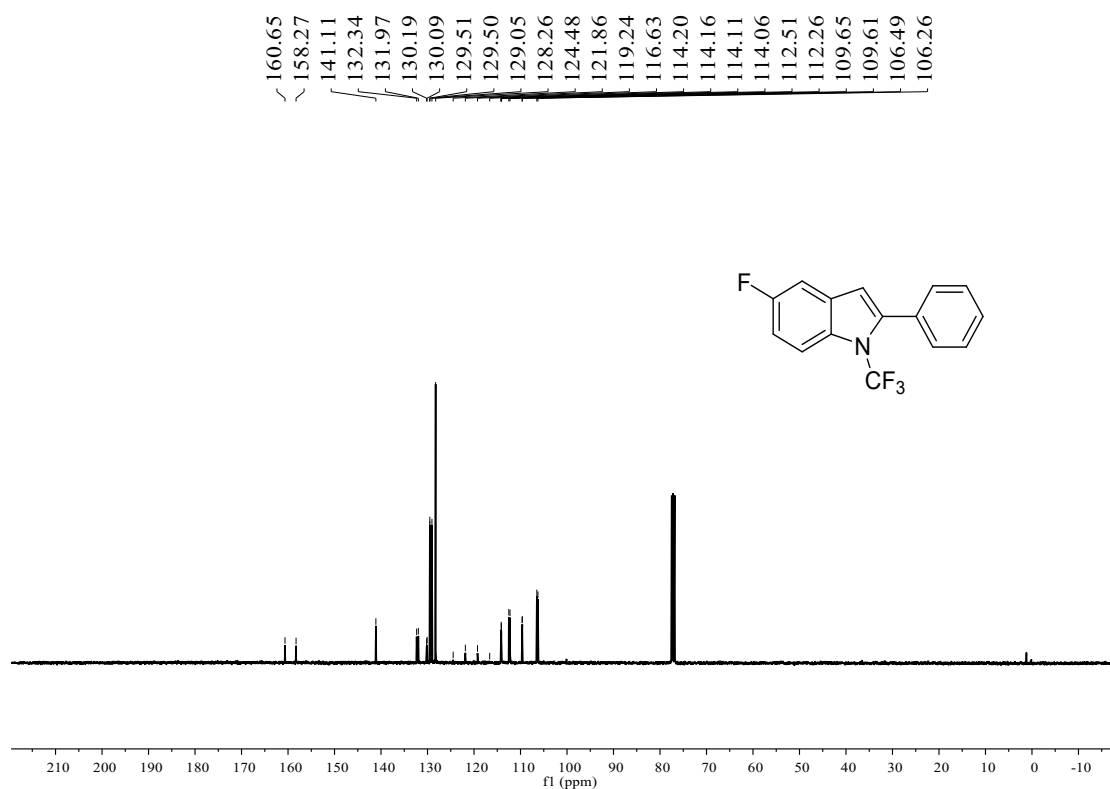

$^1\text{H}$  NMR Spectrum of **3bf** (400 MHz,  $\text{CDCl}_3$ )

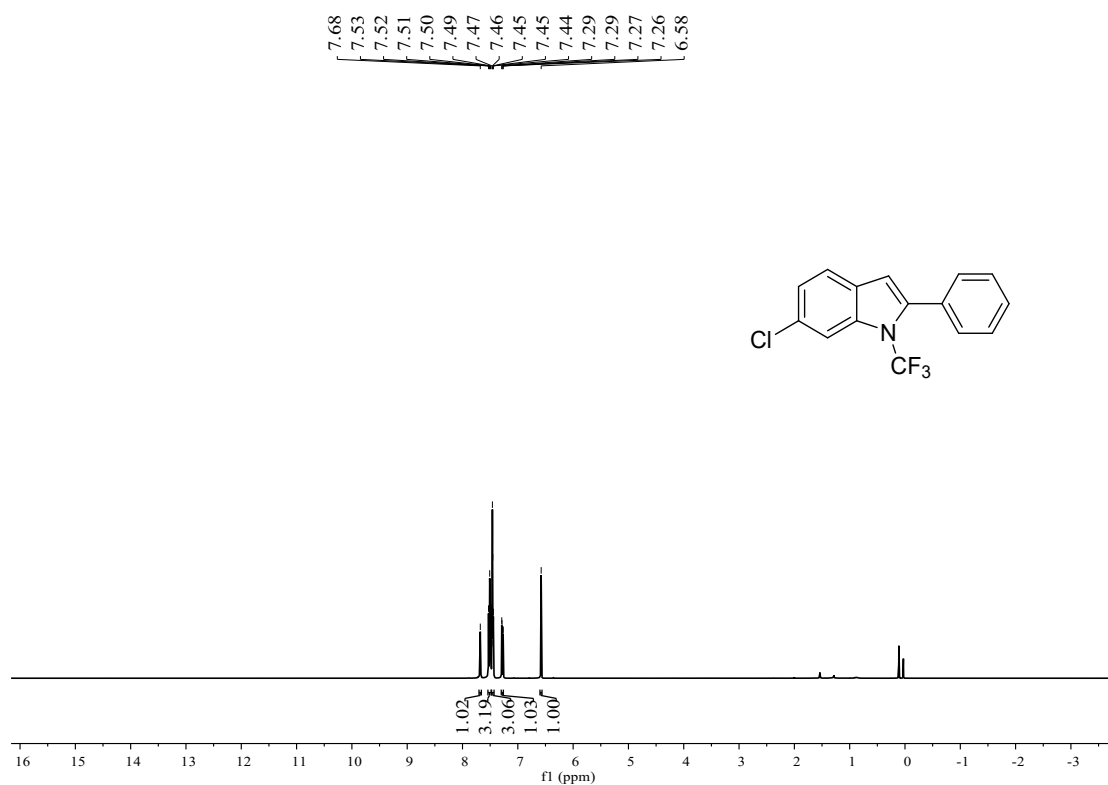

$^{19}\text{F}$  NMR Spectrum of **3bf** (376 MHz,  $\text{CDCl}_3$ )

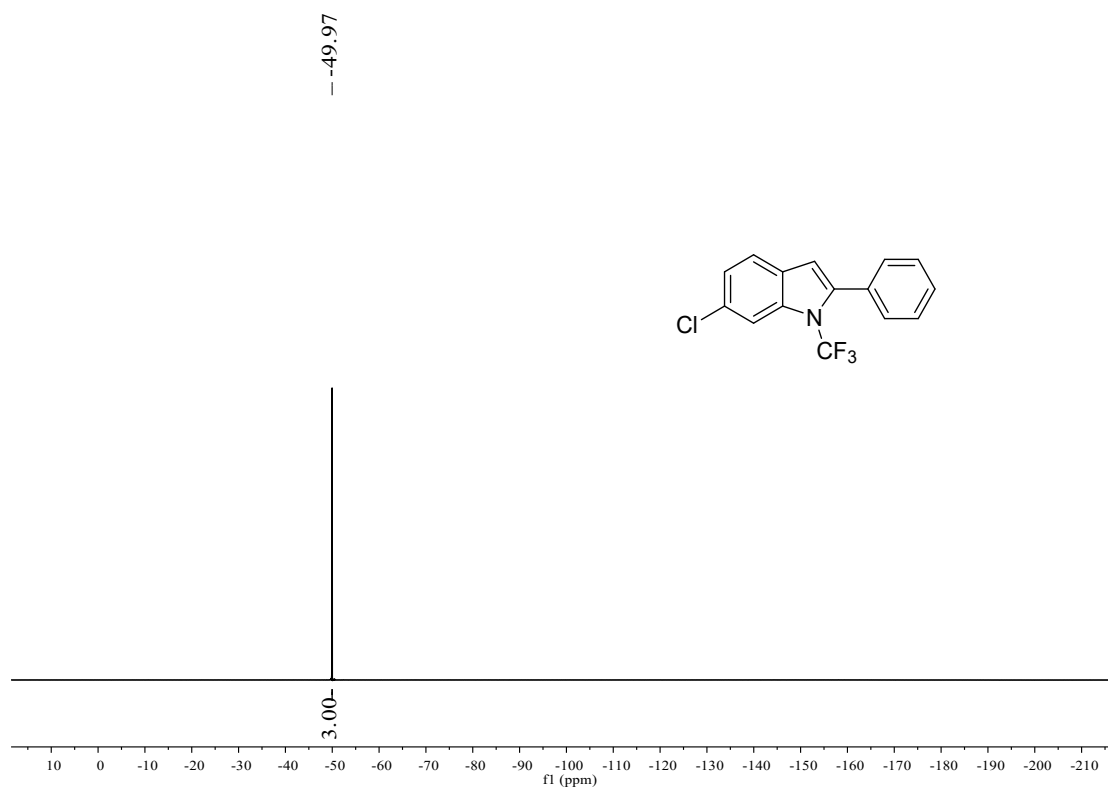

<sup>13</sup>C NMR Spectrum of **3bf** (101 MHz, CDCl<sub>3</sub>)

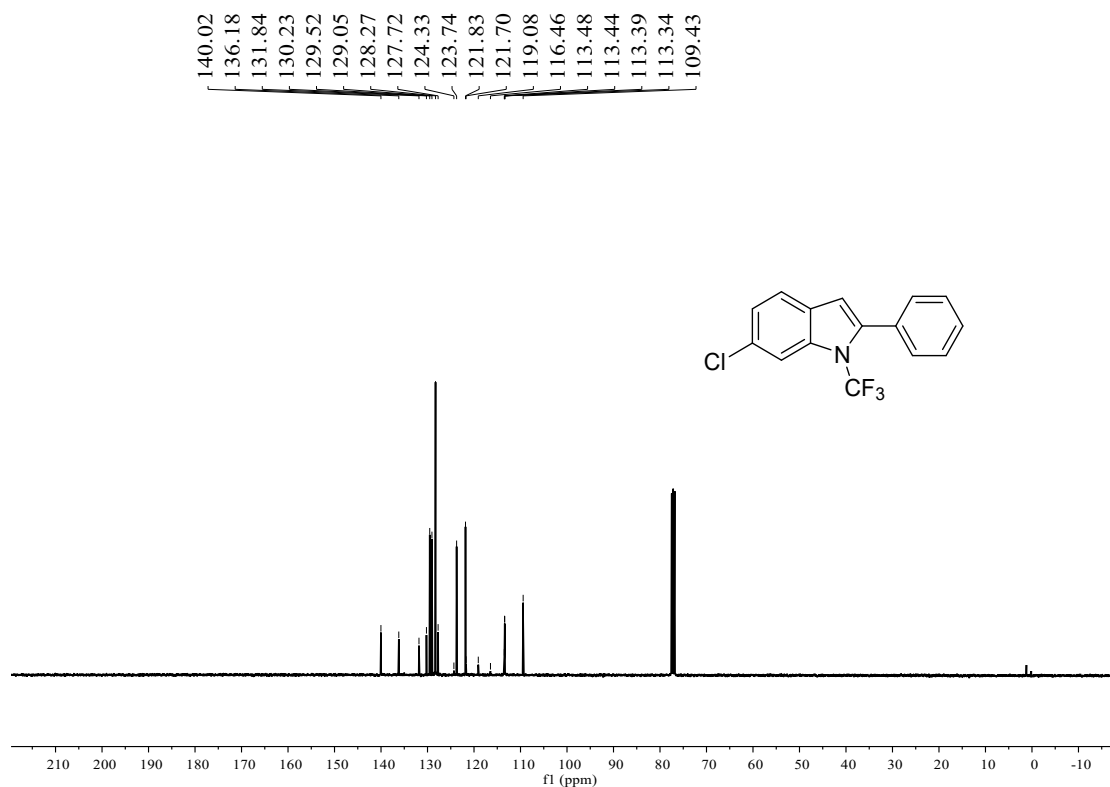

<sup>1</sup>H NMR Spectrum of **3bg** (400 MHz, CDCl<sub>3</sub>)

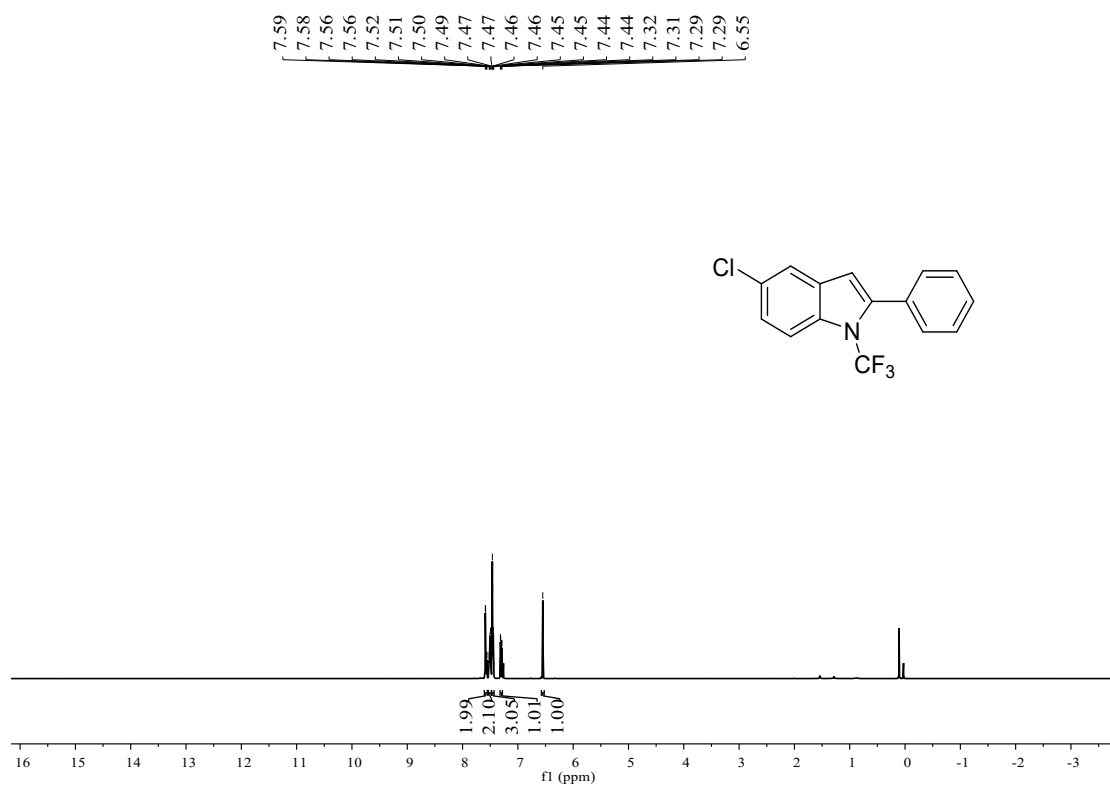

<sup>19</sup>F NMR Spectrum of **3bg** (376 MHz, CDCl<sub>3</sub>)

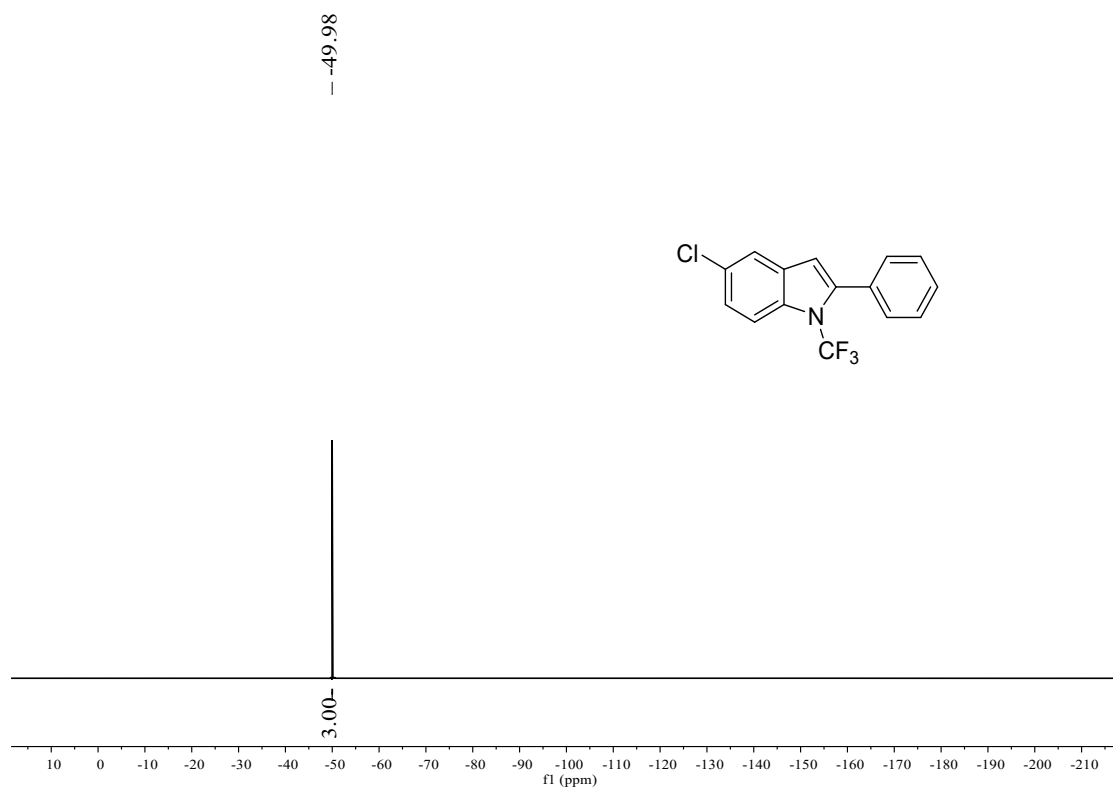

<sup>13</sup>C NMR Spectrum of **3bg** (101 MHz, CDCl<sub>3</sub>)

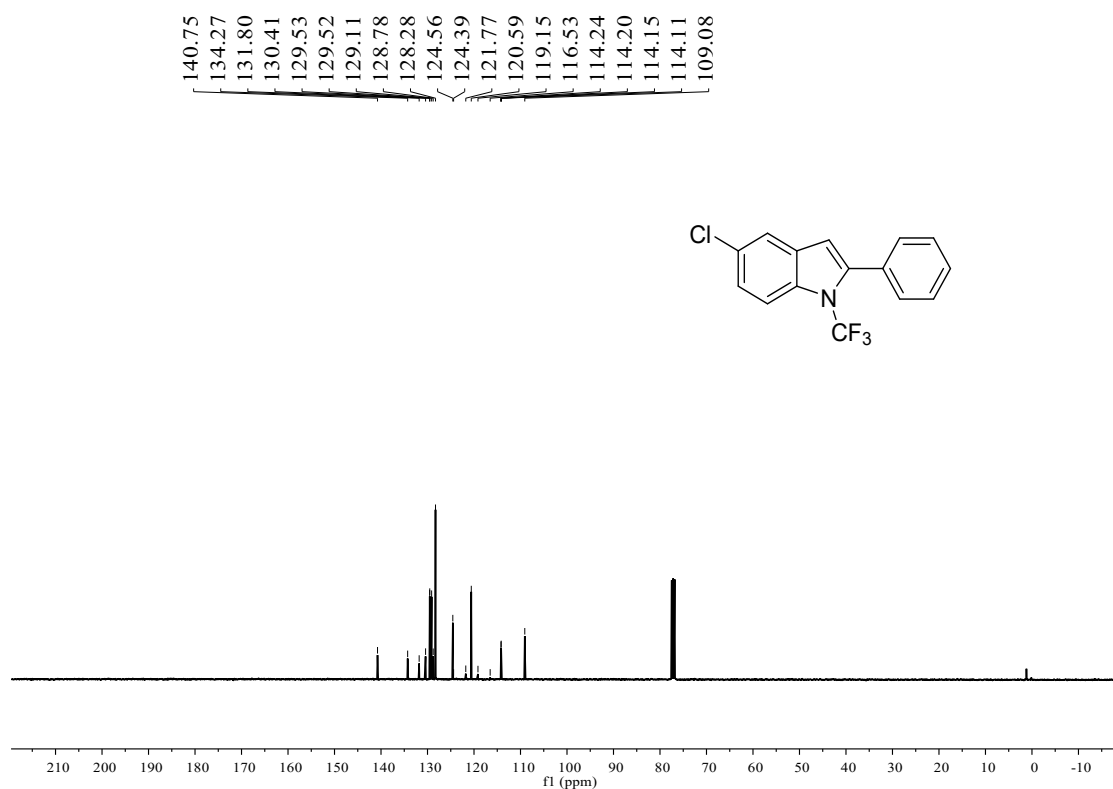

<sup>1</sup>H NMR Spectrum of **3bh** (400 MHz, CDCl<sub>3</sub>)

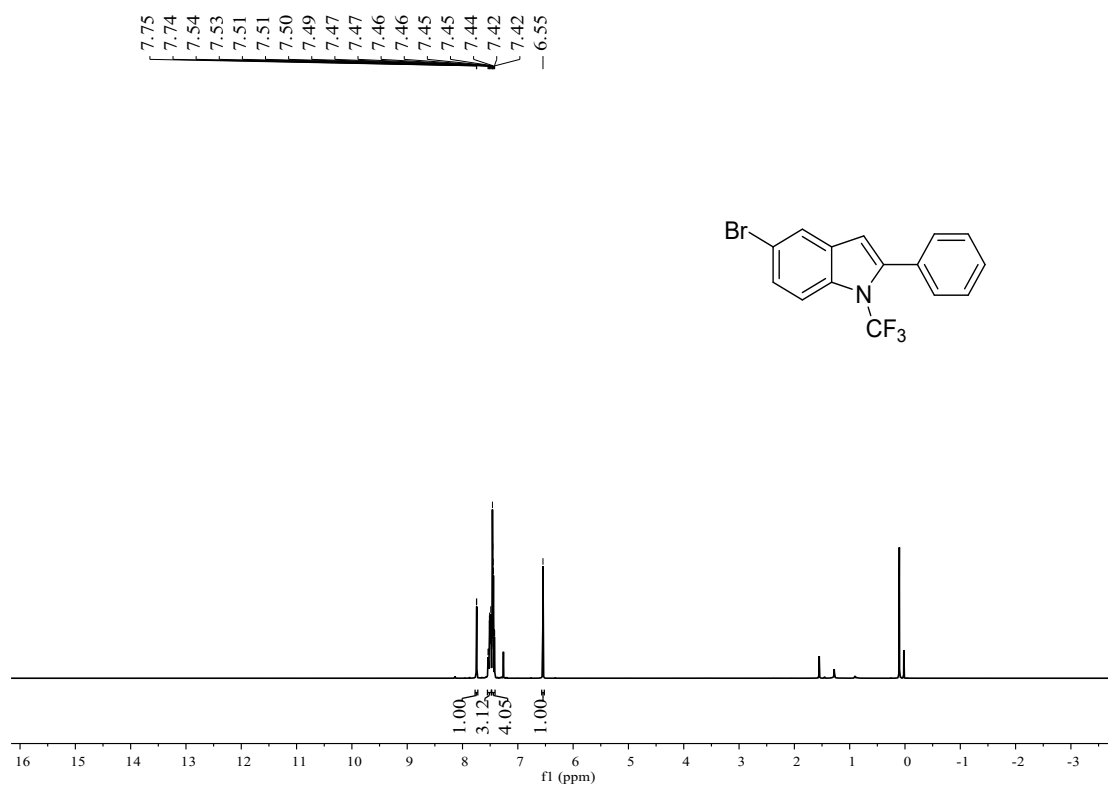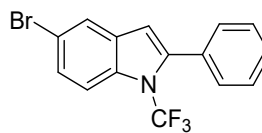

<sup>19</sup>F NMR Spectrum of **3bh** (376 MHz, CDCl<sub>3</sub>)

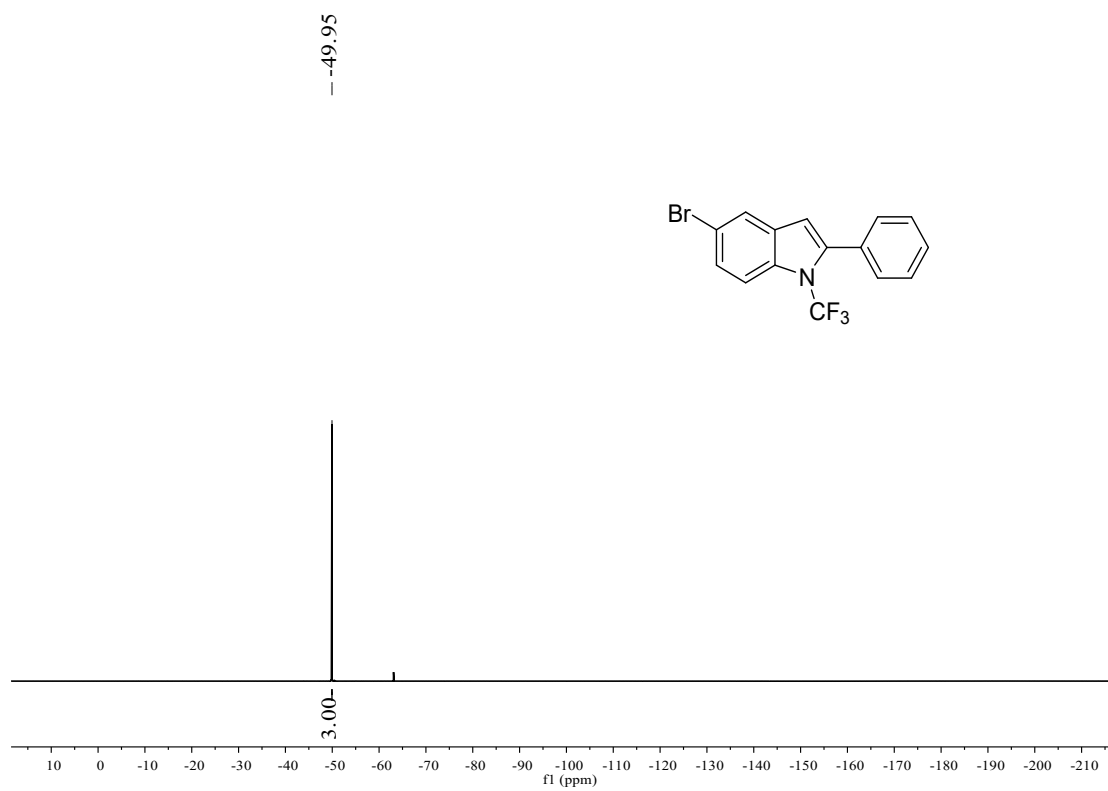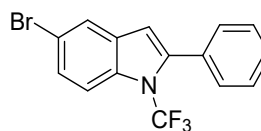

<sup>13</sup>C NMR Spectrum of **3bh** (101 MHz, CDCl<sub>3</sub>)

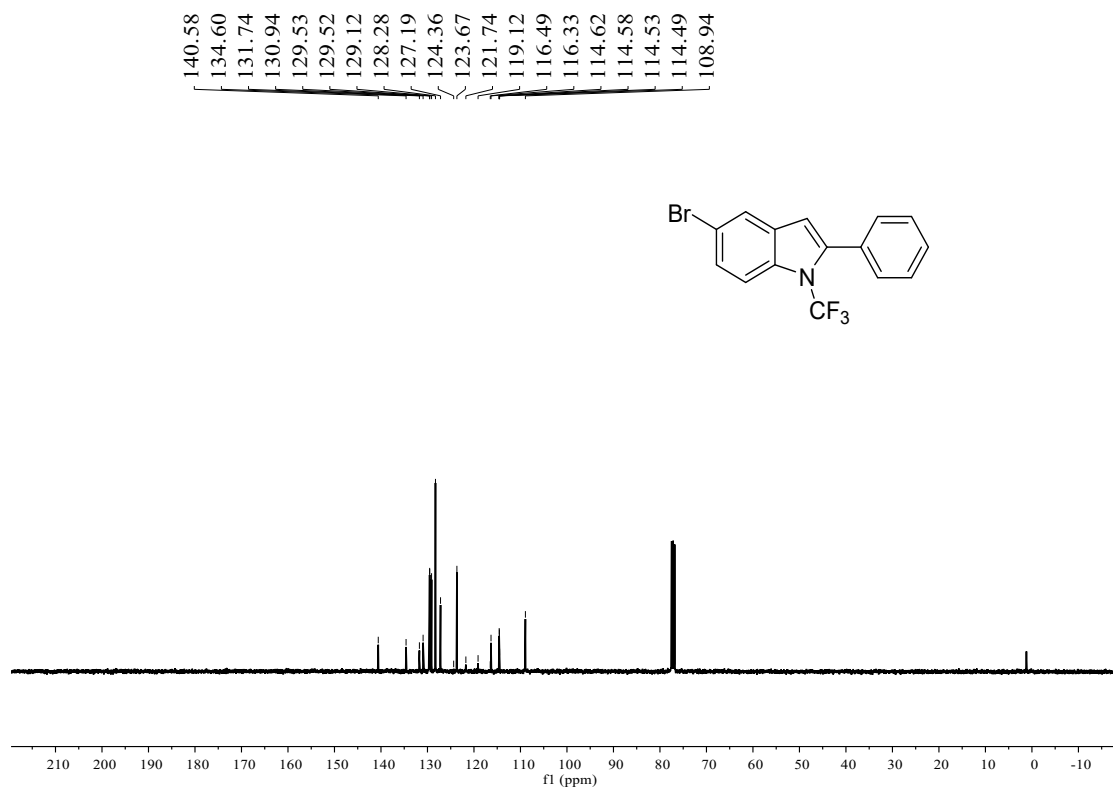

<sup>1</sup>H NMR Spectrum of **3bi** (400 MHz, CDCl<sub>3</sub>)

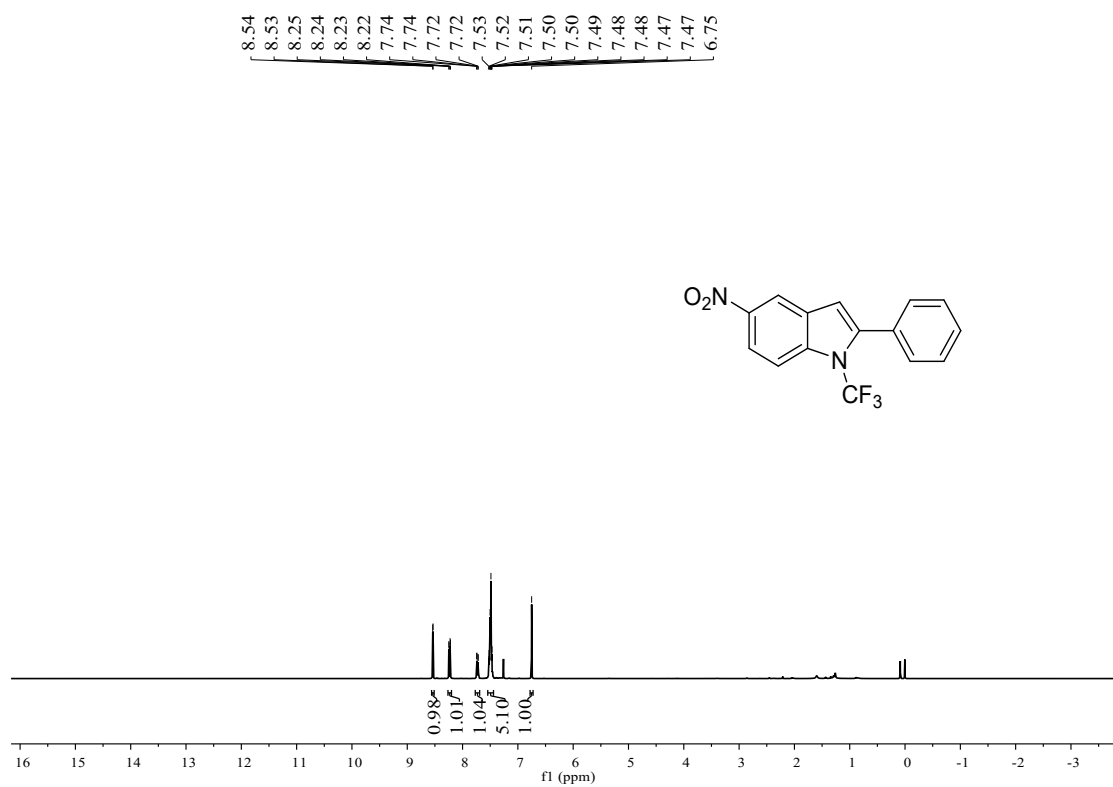

<sup>19</sup>F NMR Spectrum of **3bi** (376 MHz, CDCl<sub>3</sub>)

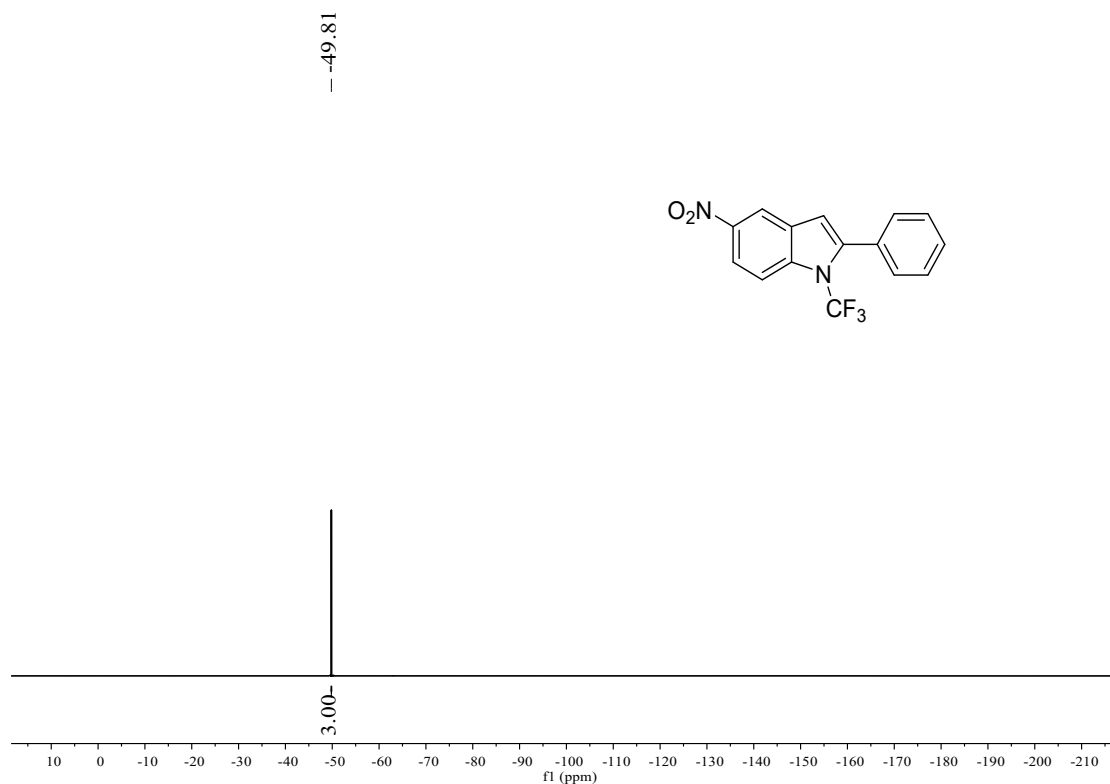

<sup>13</sup>C NMR Spectrum of **3bi** (101 MHz, CDCl<sub>3</sub>)

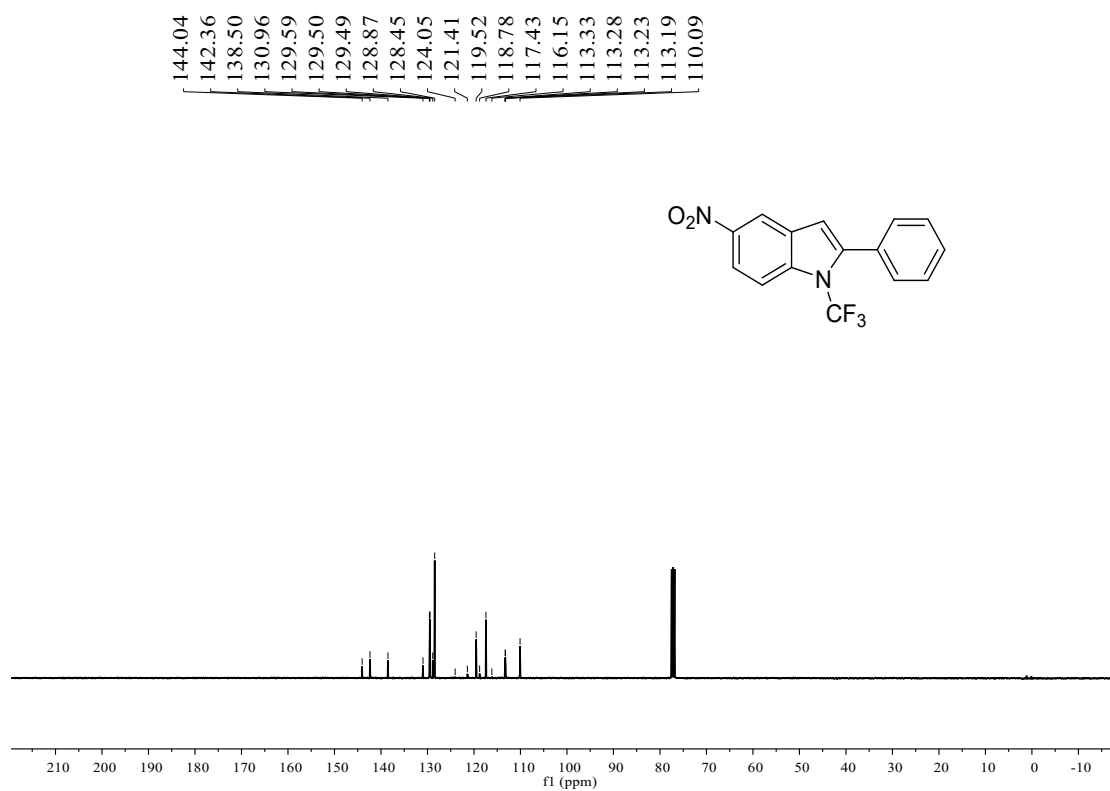



<sup>1</sup>H NMR Spectrum of **3bj** (400 MHz, CDCl<sub>3</sub>)

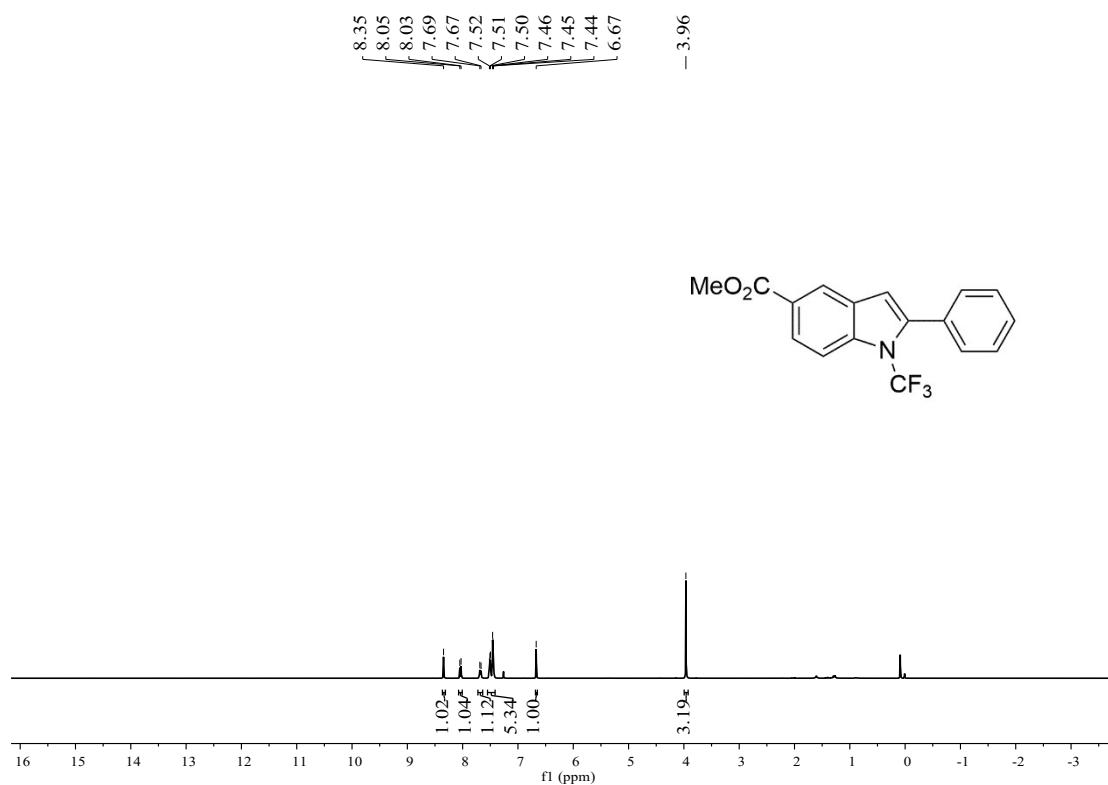

<sup>19</sup>F NMR Spectrum of **3bj** (376 MHz, CDCl<sub>3</sub>)

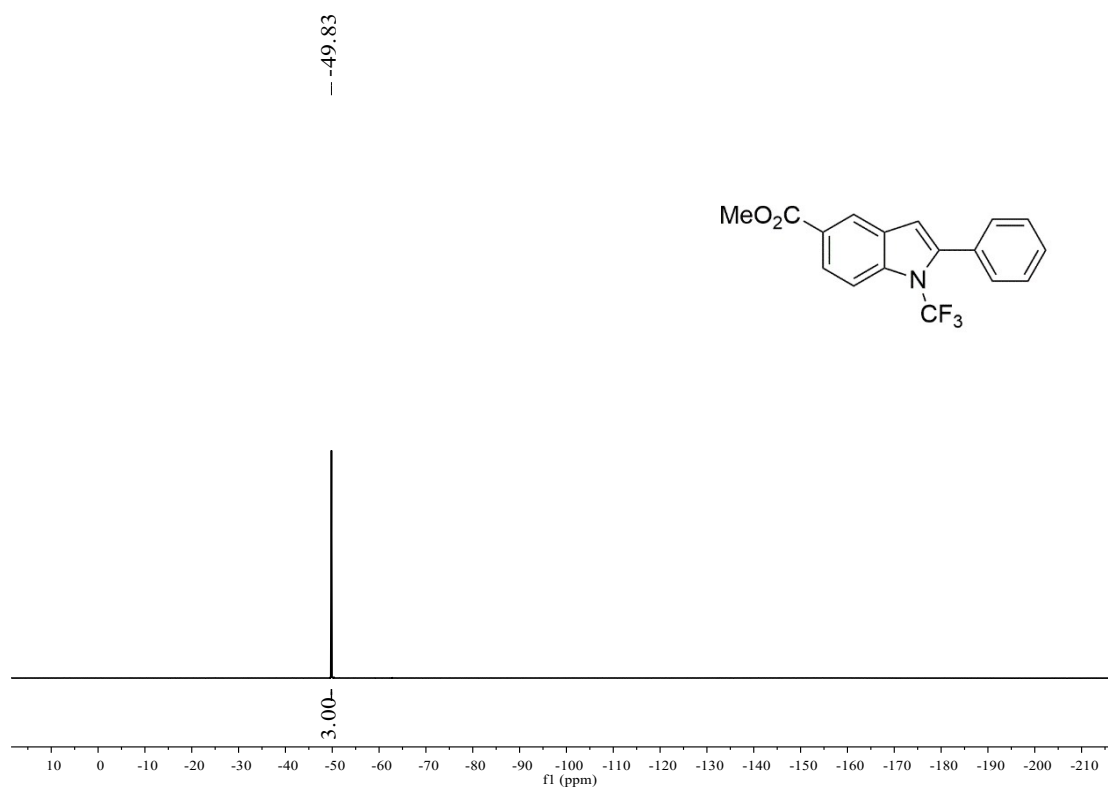

<sup>13</sup>C NMR Spectrum of **3bj** (101 MHz, CDCl<sub>3</sub>)

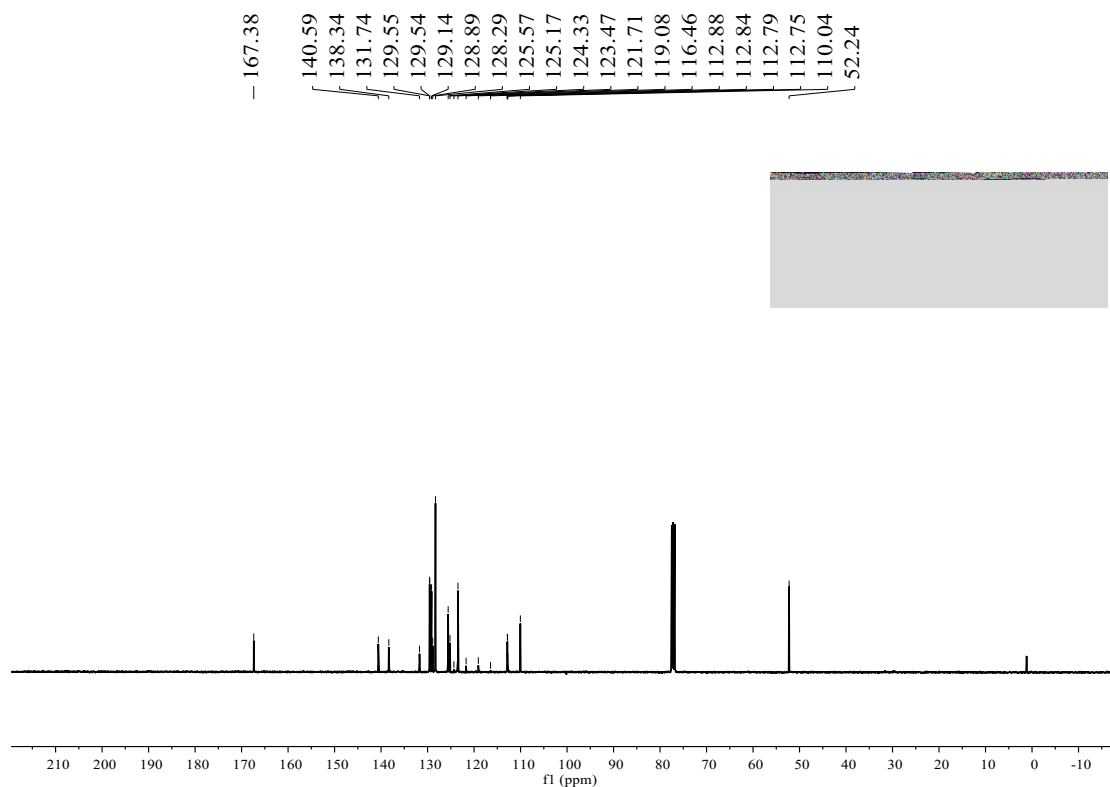

<sup>1</sup>H NMR Spectrum of **3bk** (400 MHz, CDCl<sub>3</sub>)

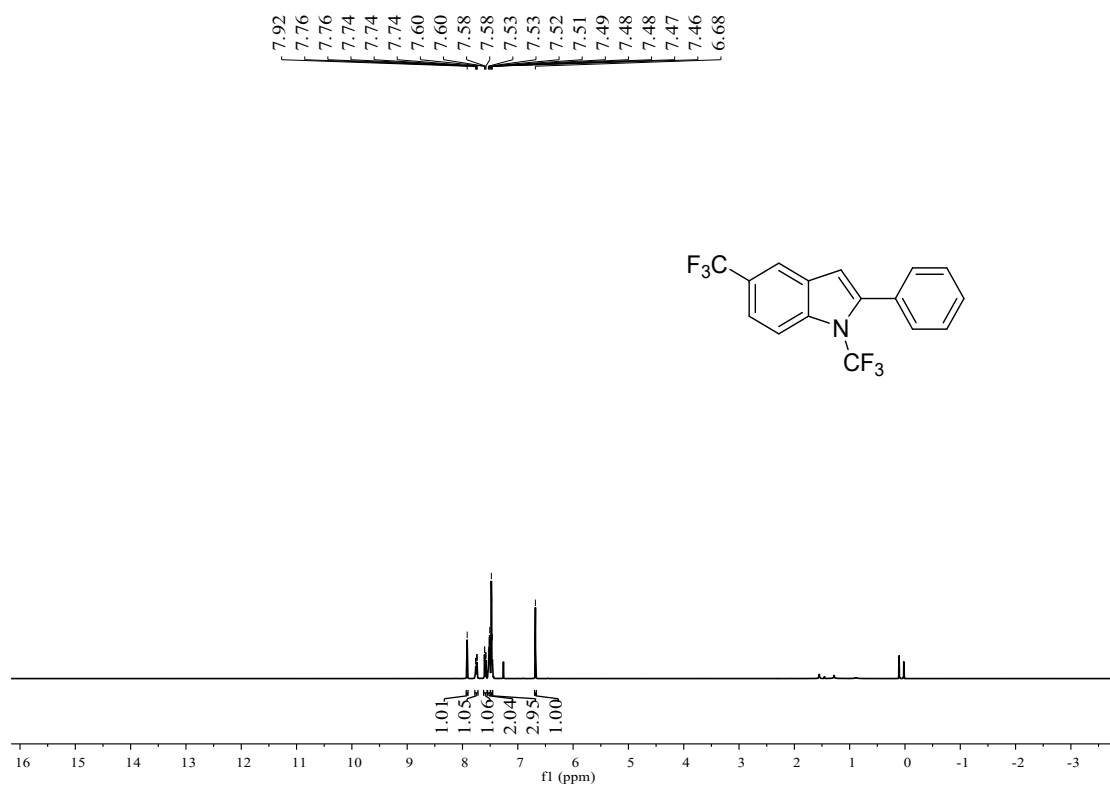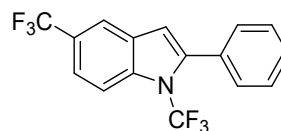

<sup>19</sup>F NMR Spectrum of **3bk** (376 MHz, CDCl<sub>3</sub>)

--49.86  
--61.20

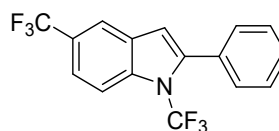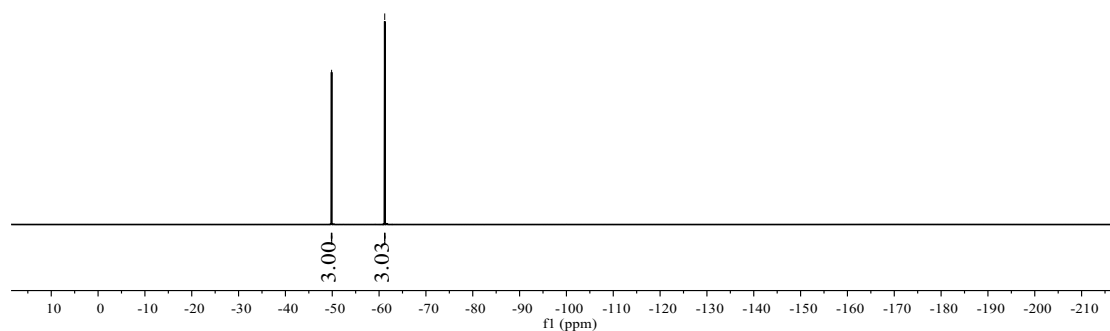

<sup>13</sup>C NMR Spectrum of **3bk** (101 MHz, CDCl<sub>3</sub>)

141.09  
137.23  
131.58  
129.58  
129.56  
129.29  
128.83  
128.36  
126.12  
126.09  
125.76  
125.44  
125.12  
124.32  
123.42  
121.70  
121.11  
121.08  
121.05  
121.02  
120.72  
119.07  
118.71  
118.67  
118.63  
118.59  
116.45  
113.51  
113.47  
113.42  
113.38  
109.69

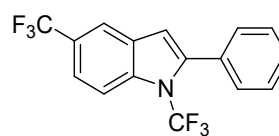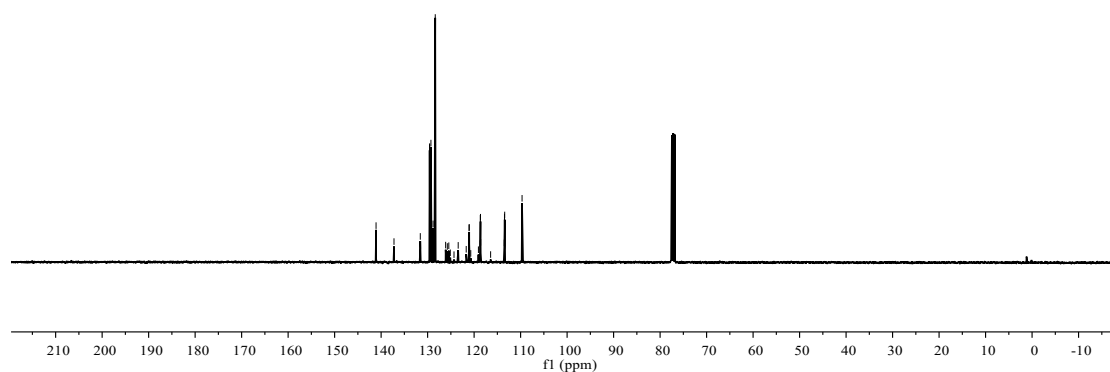

$^1\text{H}$  NMR Spectrum of **3bl** (400 MHz,  $\text{CDCl}_3$ )

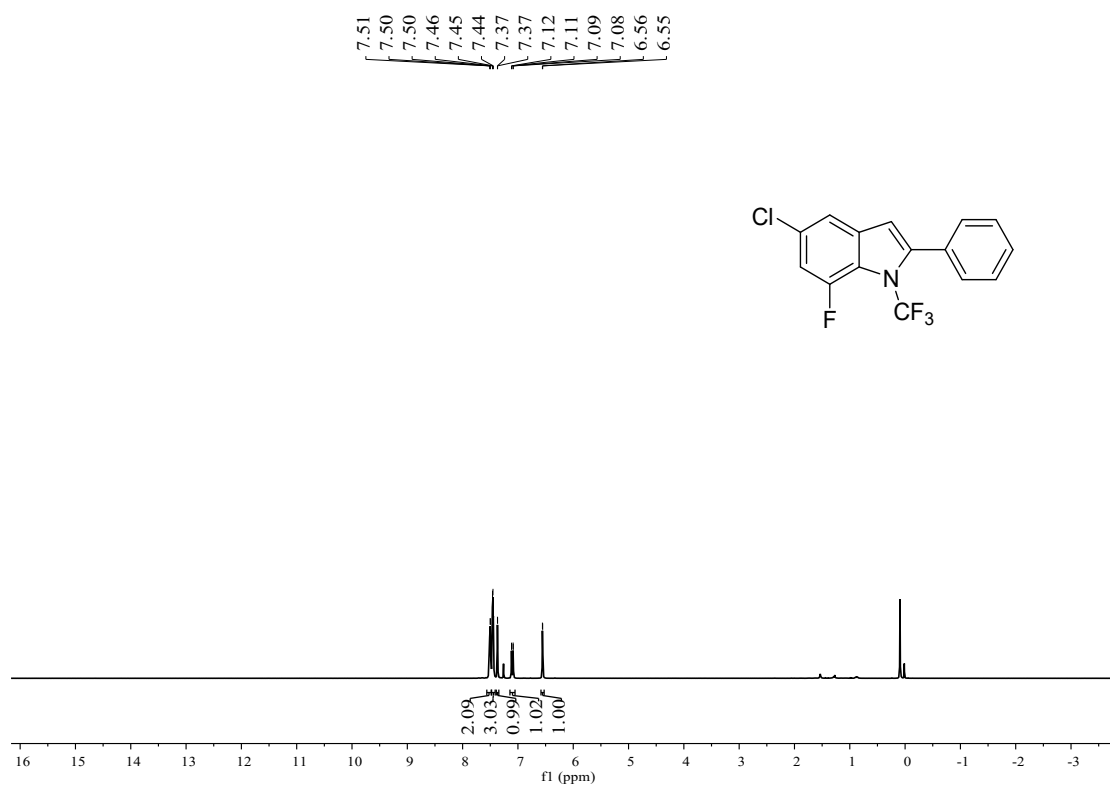

$^{19}\text{F}$  NMR Spectrum of **3bl** (376 MHz,  $\text{CDCl}_3$ )

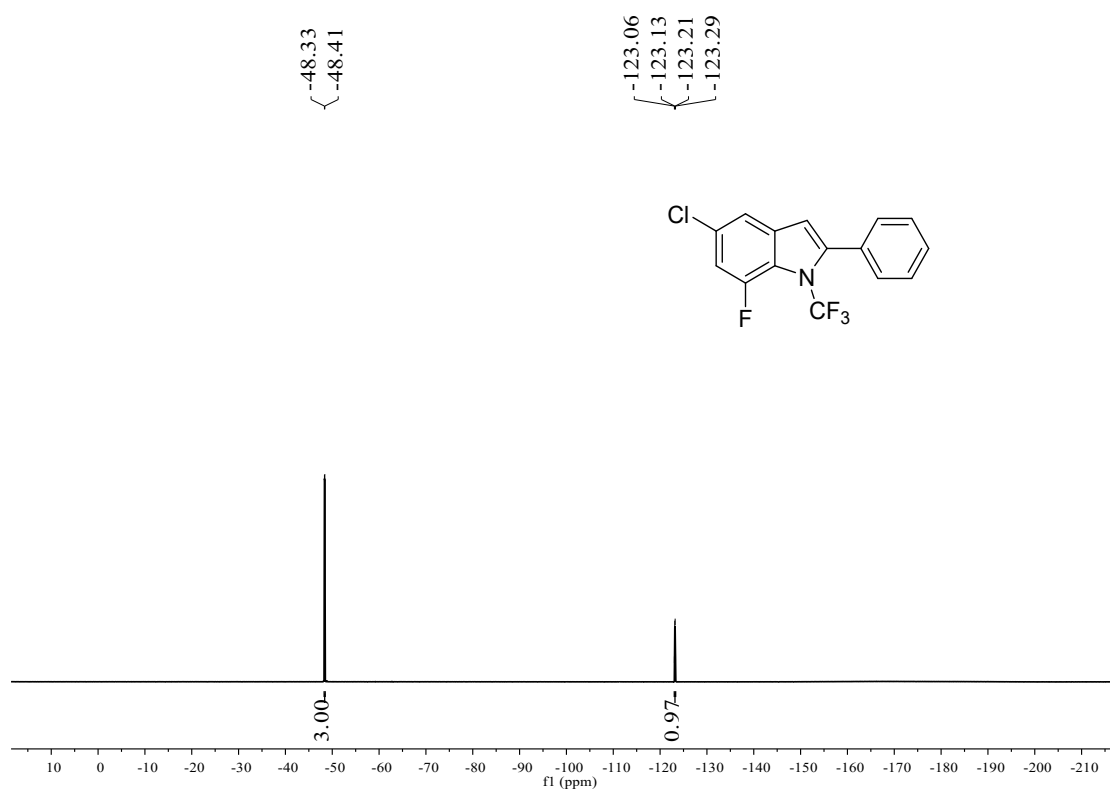

<sup>13</sup>C NMR Spectrum of **3bl** (101 MHz, CDCl<sub>3</sub>)

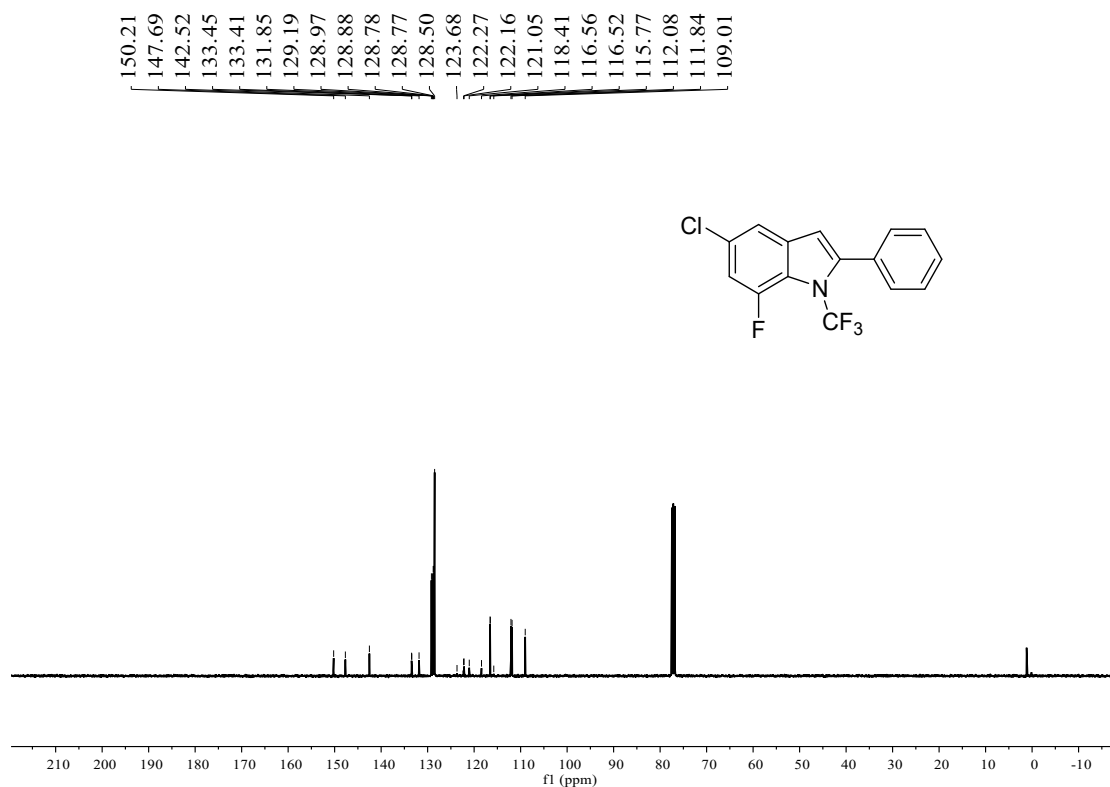

<sup>1</sup>H NMR Spectrum of **3bm** (400 MHz, CDCl<sub>3</sub>)

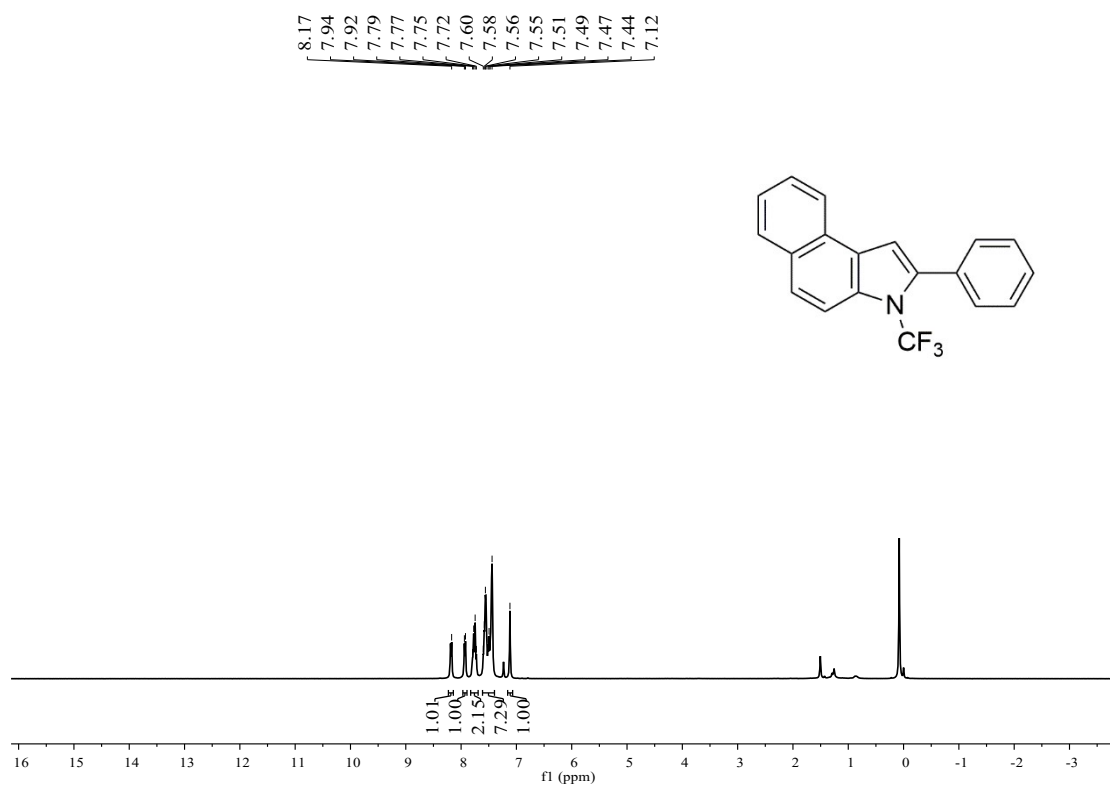

$^{19}\text{F}$  NMR Spectrum of **3bm** (376 MHz,  $\text{CDCl}_3$ )

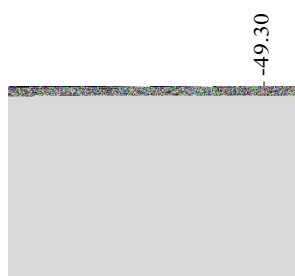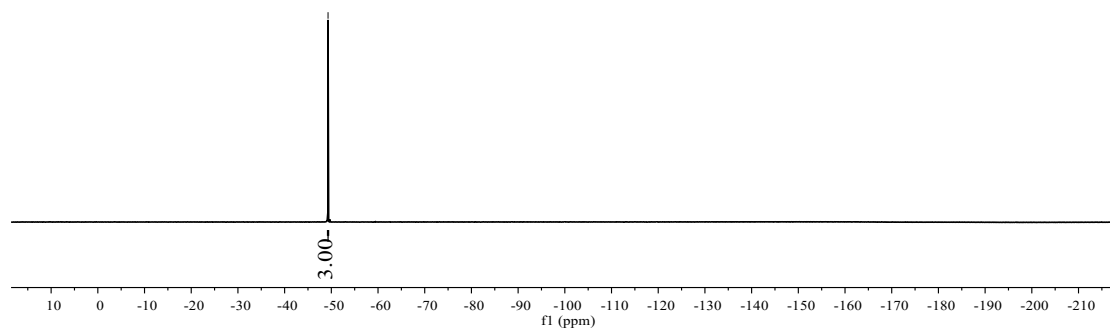

$^{13}\text{C}$  NMR Spectrum of **3bm** (101 MHz,  $\text{CDCl}_3$ )

138.05  
132.64  
132.53  
130.17  
129.71  
129.70  
128.74  
128.63  
128.24  
127.40  
126.64  
125.15  
125.02  
124.81  
124.54  
123.23  
121.92  
119.30  
116.68  
113.41  
113.37  
113.33  
113.28  
108.29

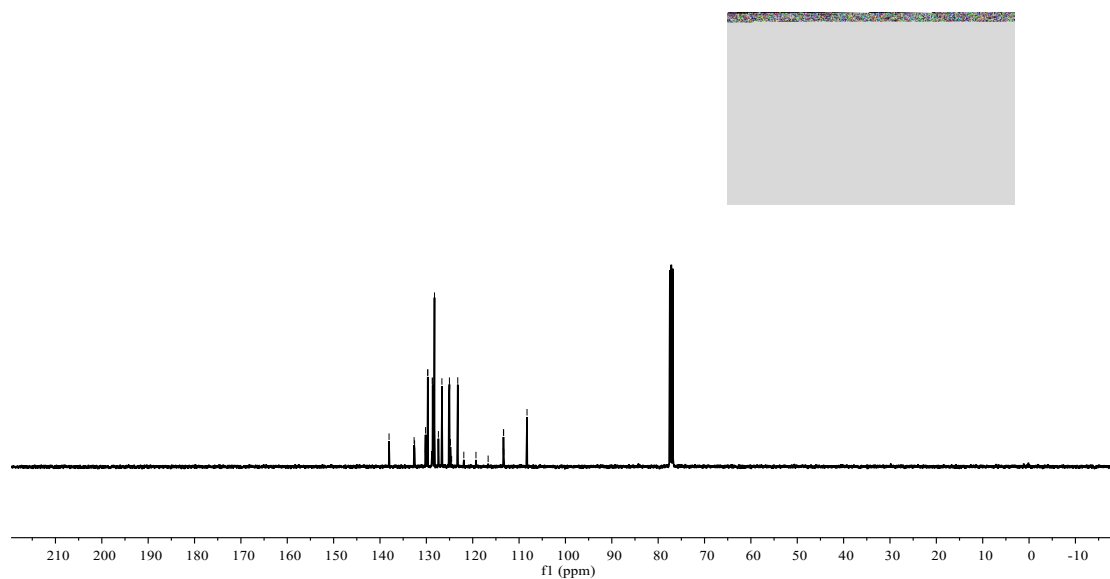

<sup>1</sup>H NMR Spectrum of **3bn** (400 MHz, CDCl<sub>3</sub>)

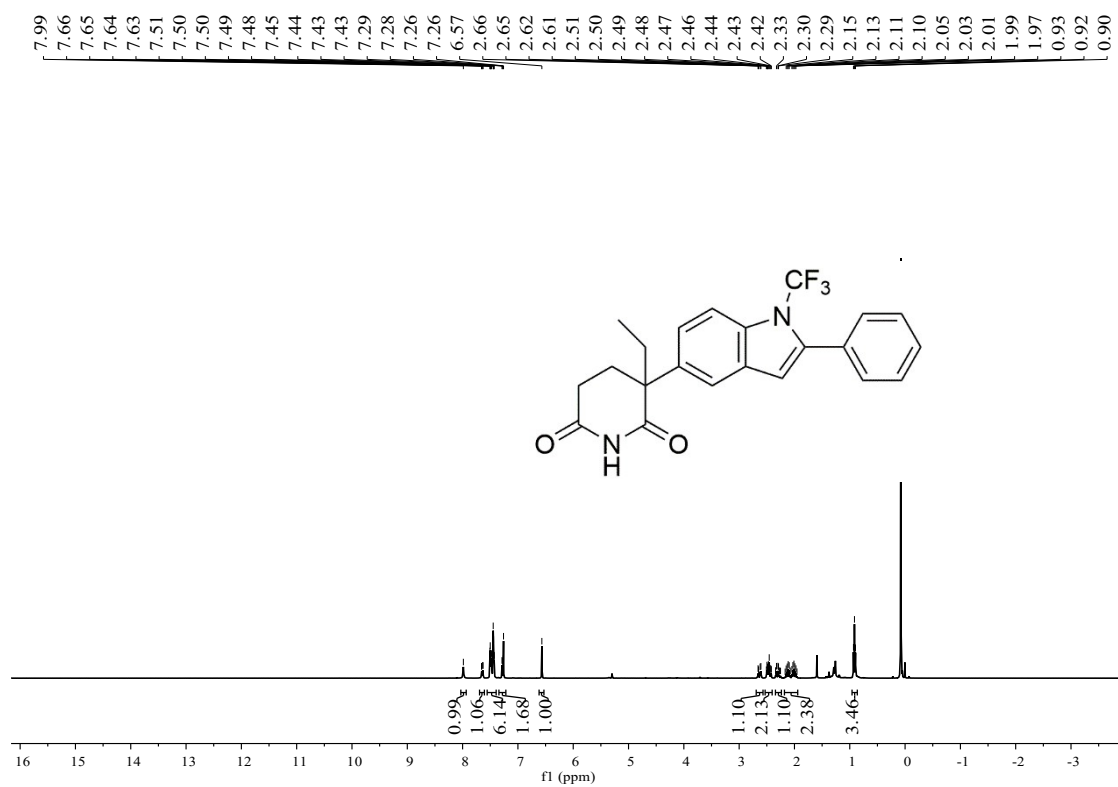

<sup>19</sup>F NMR Spectrum of **3bn** (376 MHz, CDCl<sub>3</sub>)

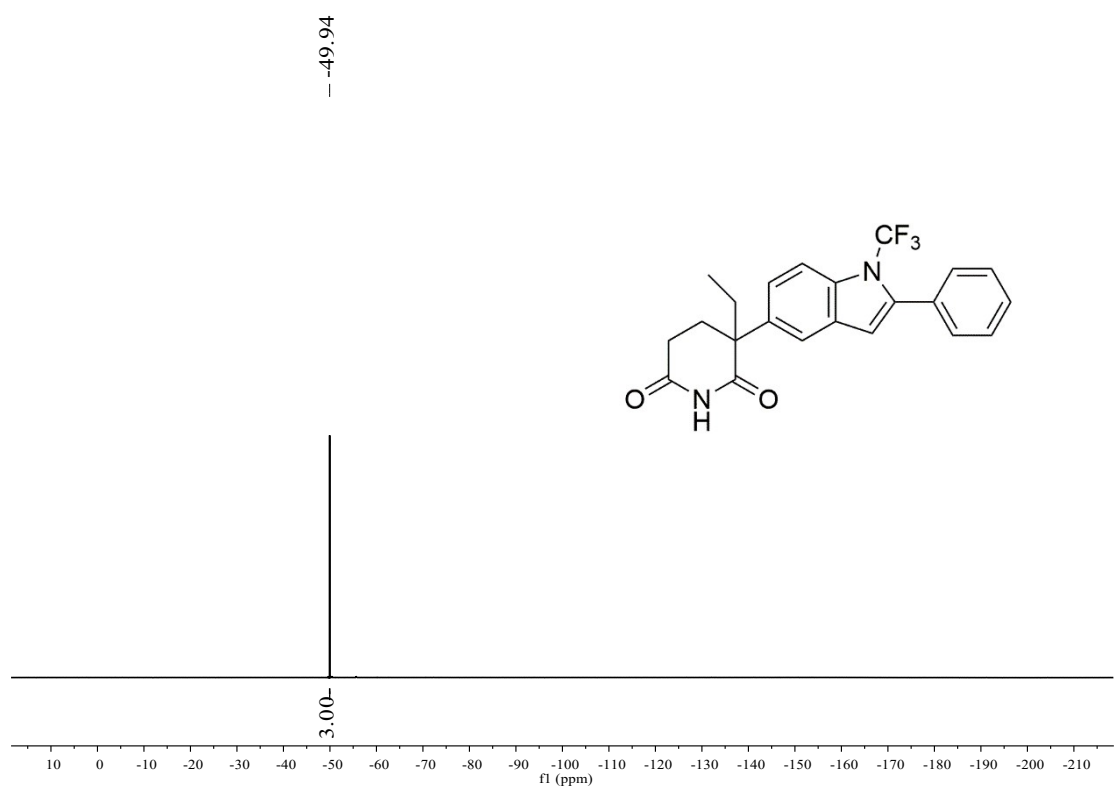

<sup>13</sup>C NMR Spectrum of **3bn** (101 MHz, CDCl<sub>3</sub>)

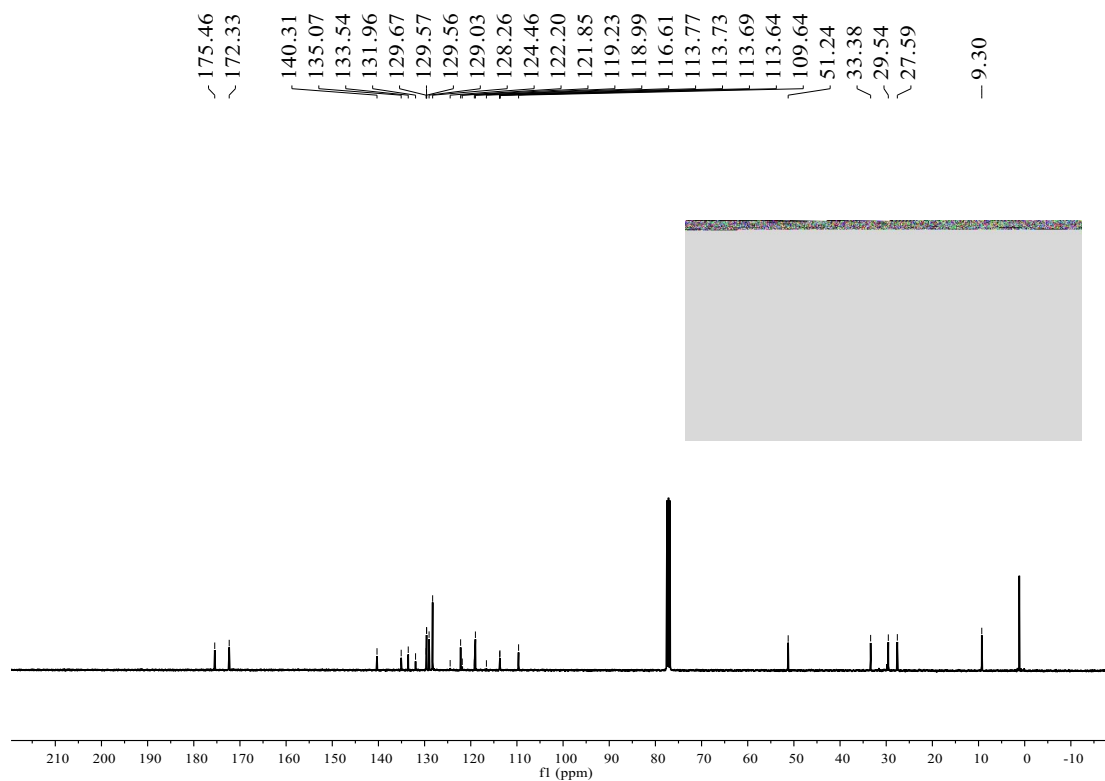

<sup>1</sup>H NMR Spectrum of **3bo** (600 MHz, CDCl<sub>3</sub>)

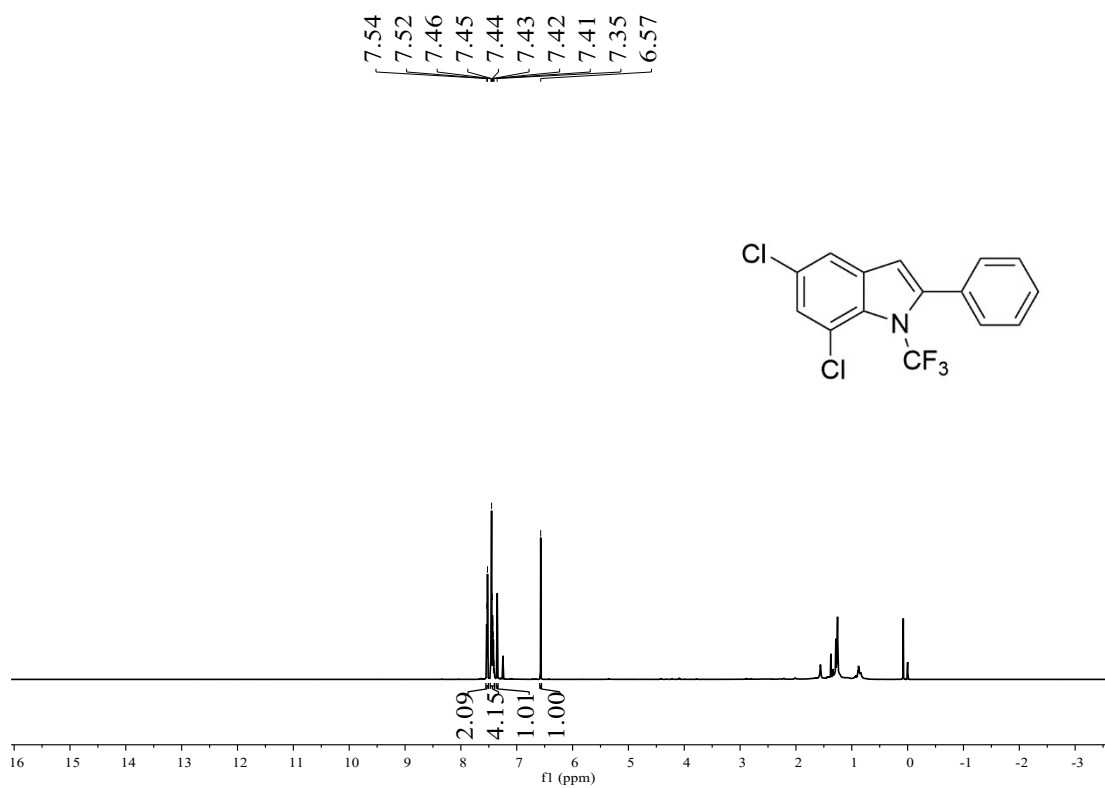



<sup>19</sup>F NMR Spectrum of **3bo** (565 MHz, CDCl<sub>3</sub>)

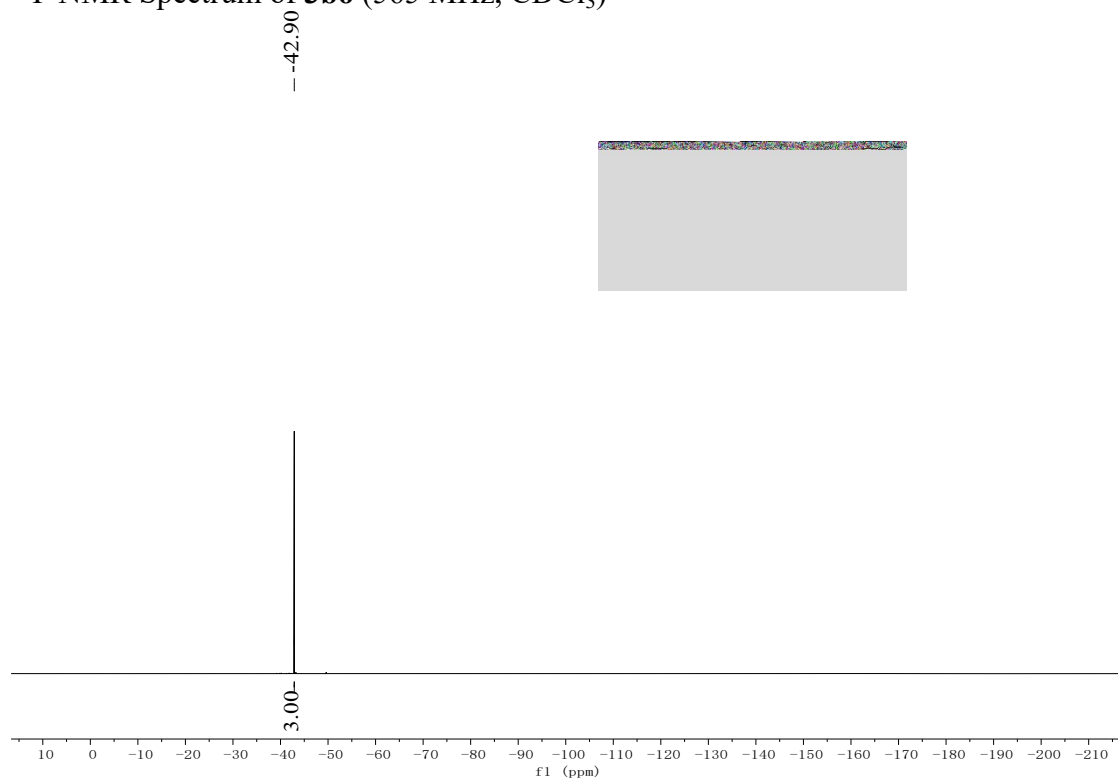

<sup>13</sup>C NMR Spectrum of **3bo** (151 MHz, CDCl<sub>3</sub>)

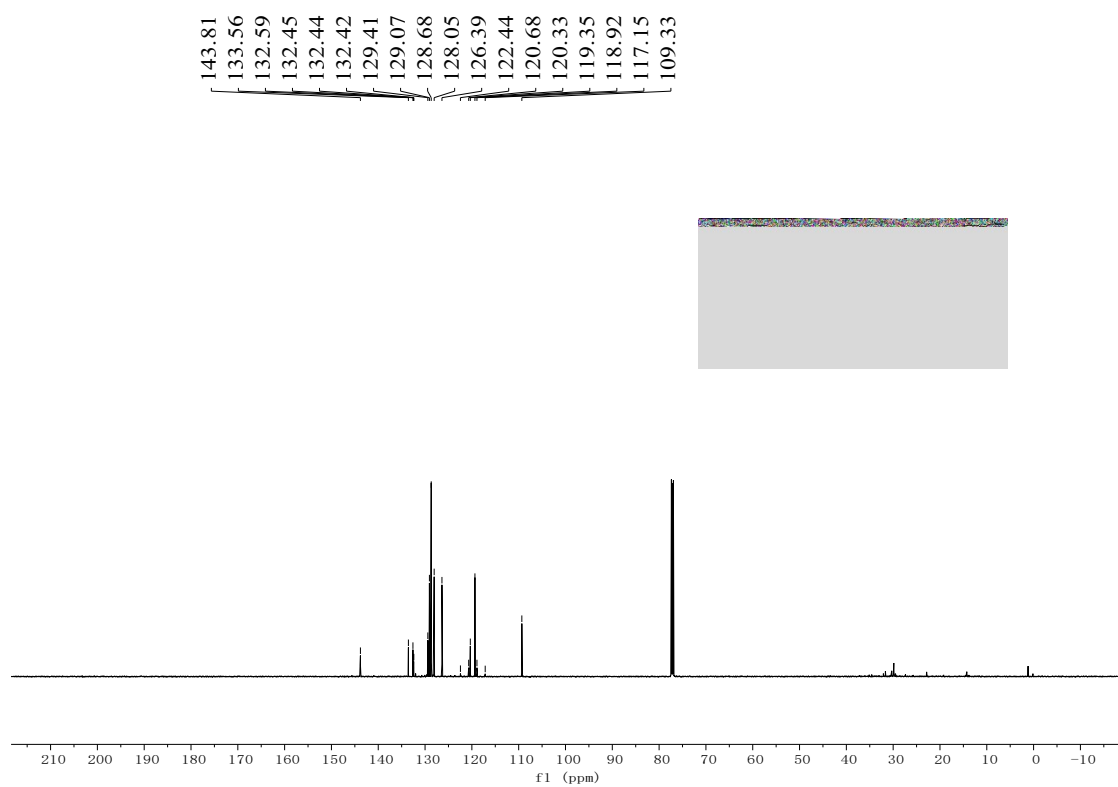

<sup>1</sup>H NMR Spectrum of **3bp** (600 MHz, CDCl<sub>3</sub>)

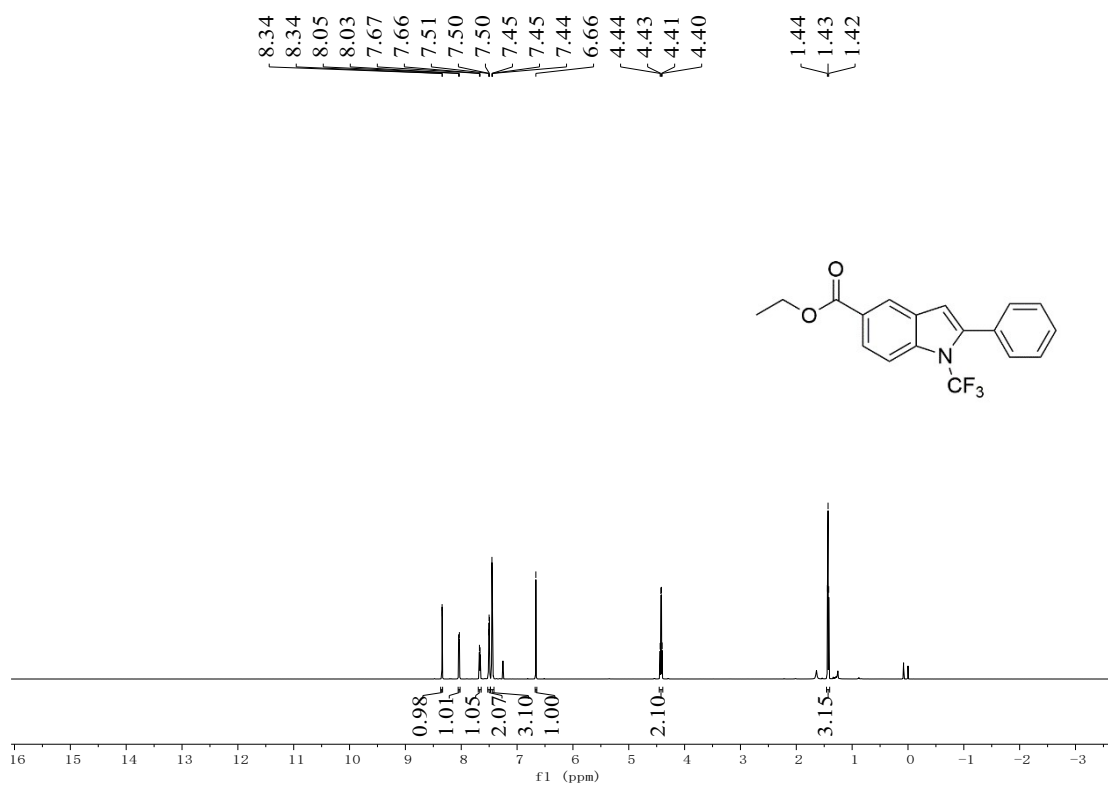

<sup>19</sup>F NMR Spectrum of **3bp** (565 MHz, CDCl<sub>3</sub>)

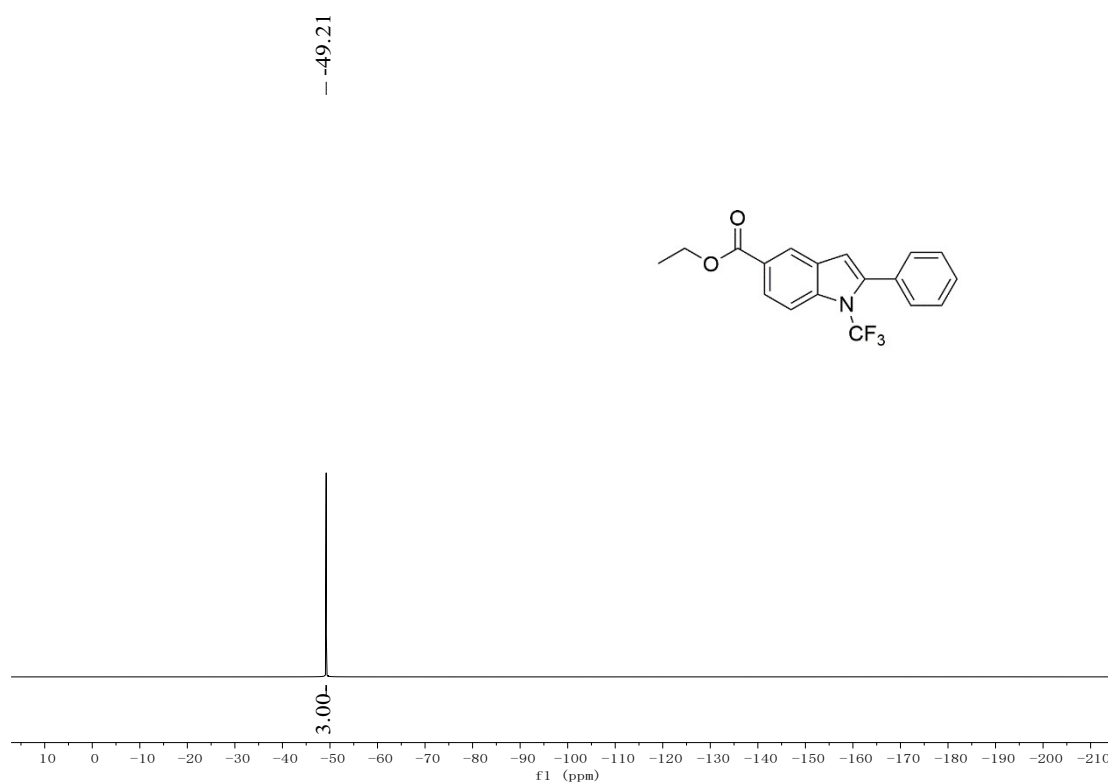

<sup>13</sup>C NMR Spectrum of **3bp** (151 MHz, CDCl<sub>3</sub>)

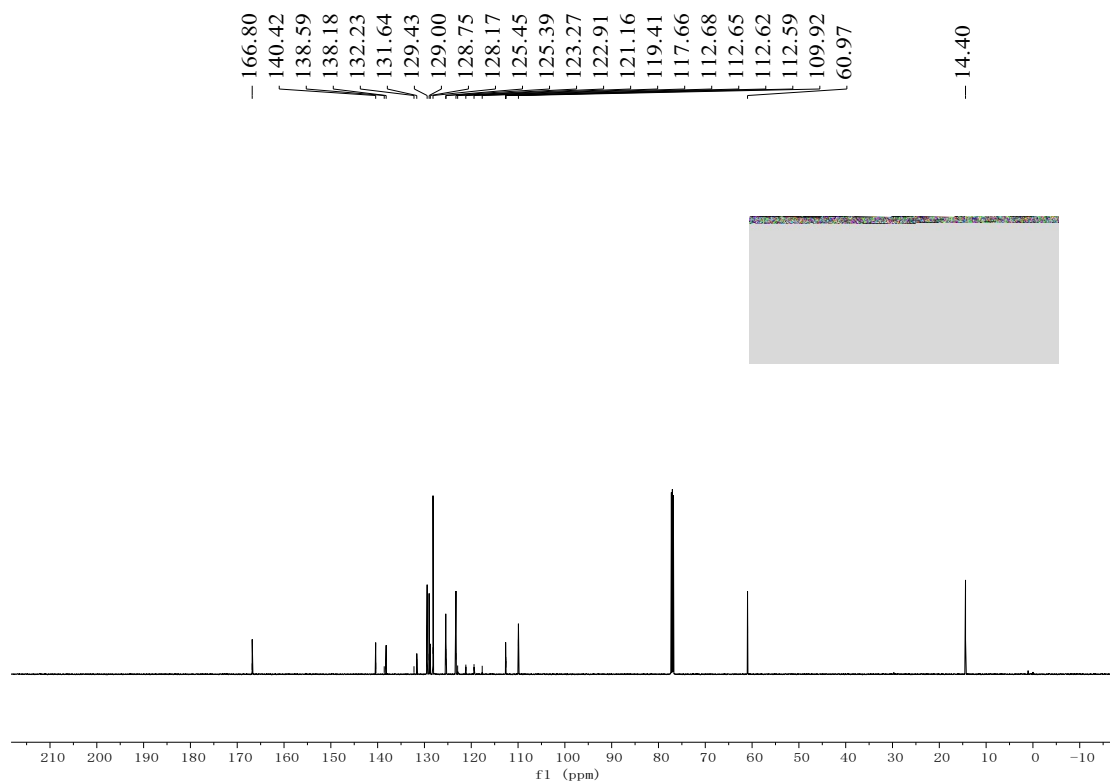

# 10. HRMS analysis reports for the new compounds

## HRMS (ESI) spectra of 3aa

### Display Report

**Analysis Info**  
Analysis Name: D:\Data\2022MS\HJQ\0629\20220621-FRL-03\_GD7\_01\_2088.d  
Method: tune\_low\_200-800\_pos-15min.m  
Sample Name: 20220621-FRL-03  
Comment:  
Acquisition Date: 6/29/2022 3:55:06 PM  
Operator: gftang  
Instrument / Ser#: micrOTOF 213750.10 257

#### Acquisition Parameter

|             |            |                      |          |                  |           |
|-------------|------------|----------------------|----------|------------------|-----------|
| Source Type | ESI        | Ion Polarity         | Positive | Set Nebulizer    | 1.0 Bar   |
| Focus       | Not active |                      |          | Set Dry Heater   | 200 °C    |
| Scan Begin  | 100 m/z    | Set Capillary        | 4000 V   | Set Dry Gas      | 4.0 l/min |
| Scan End    | 1000 m/z   | Set End Plate Offset | -500 V   | Set Divert Valve | Waste     |

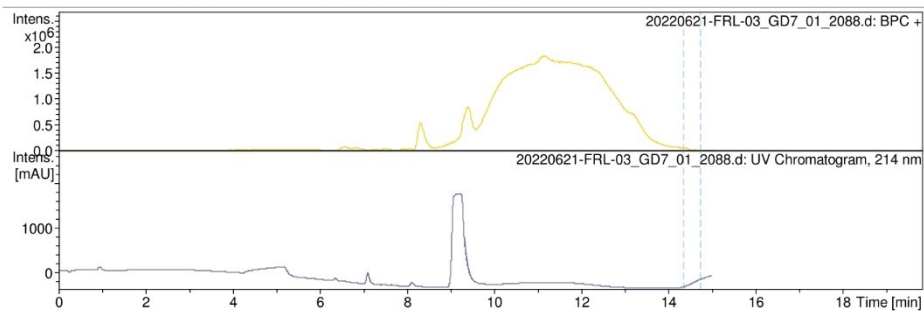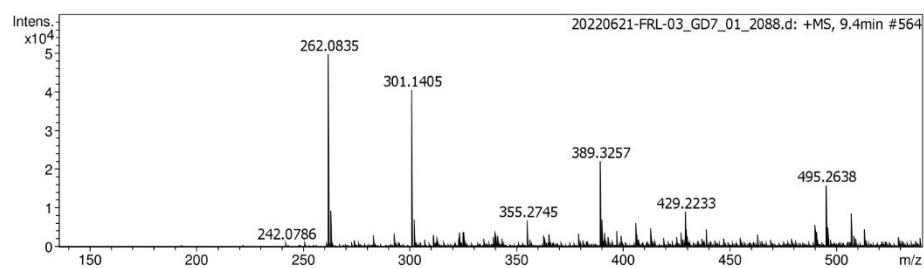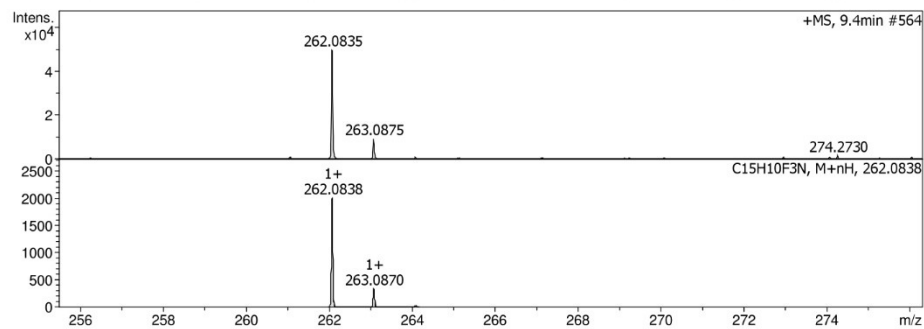

# HRMS (ESI) spectra of **3ab**

## Generic Display Report

**Analysis Info**  
Analysis Name: D:\Data\2022MS\HJQ\0926\20220920-FRL-01\_BC4\_01\_2984.d  
Method: tune\_low\_20-400\_pos-icmsmin.m  
Sample Name: 20220920-FRL-01  
Comment:  
Acquisition Date: 26/09/2022 4:48:16 PM  
Operator: gftang  
Instrument: micrOTOF

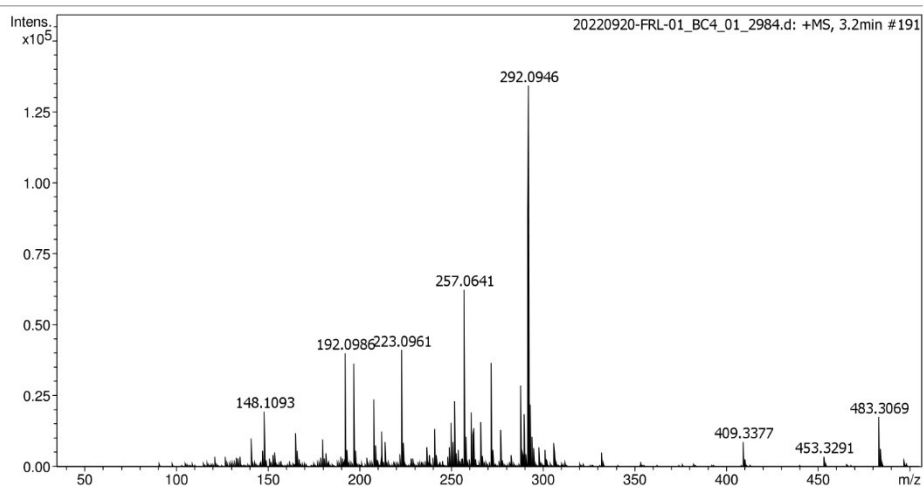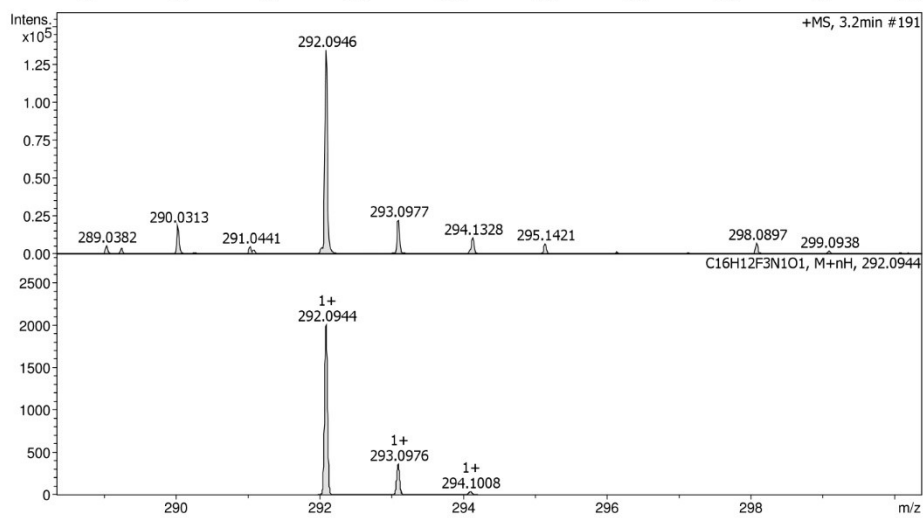

# HRMS (ESI) spectra of **3ac**

## Generic Display Report

|                      |                                                       |                  |                       |
|----------------------|-------------------------------------------------------|------------------|-----------------------|
| <b>Analysis Info</b> |                                                       | Acquisition Date | 26/09/2022 5:10:04 PM |
| Analysis Name        | D:\Data\2022MS\HJQ\0926\20220920-FRL-03_BC6_01_2986.d | Operator         | gftang                |
| Method               | tune_low_20-400_pos-icmsmin.m                         | Instrument       | micrOTOF              |
| Sample Name          | 20220920-FRL-03                                       |                  |                       |
| Comment              |                                                       |                  |                       |

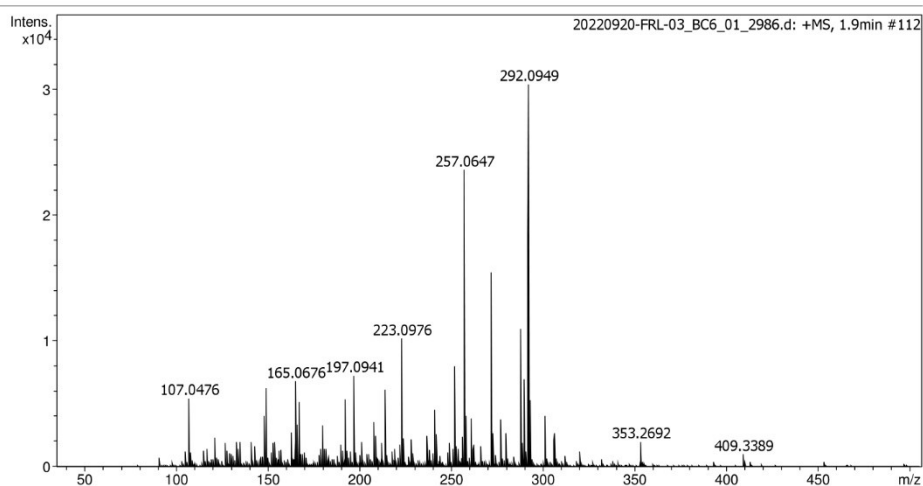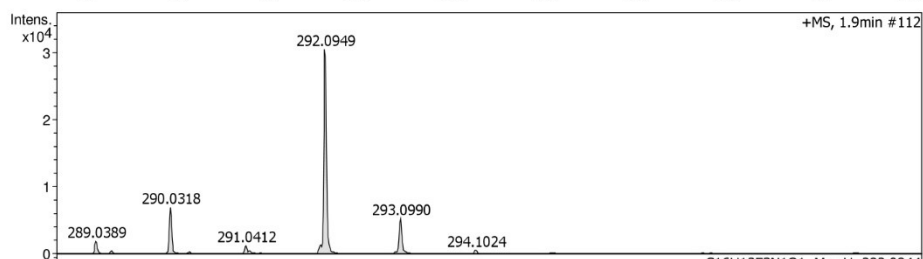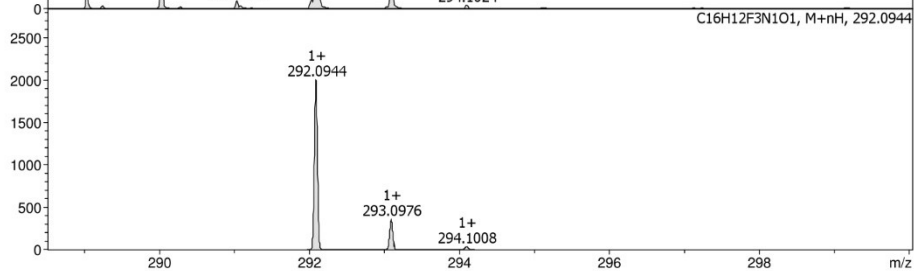

# HRMS (ESI) spectra of **3ad**

## Generic Display Report

|                      |                                                       |                  |                       |
|----------------------|-------------------------------------------------------|------------------|-----------------------|
| <b>Analysis Info</b> |                                                       | Acquisition Date | 26/09/2022 4:59:10 PM |
| Analysis Name        | D:\Data\2022MS\HJQ\0926\20220920-FRL-02_BC5_01_2985.d | Operator         | gftang                |
| Method               | tune_low_20-400_pos-icmsmin.m                         | Instrument       | micrOTOF              |
| Sample Name          | 20220920-FRL-02                                       |                  |                       |
| Comment              |                                                       |                  |                       |

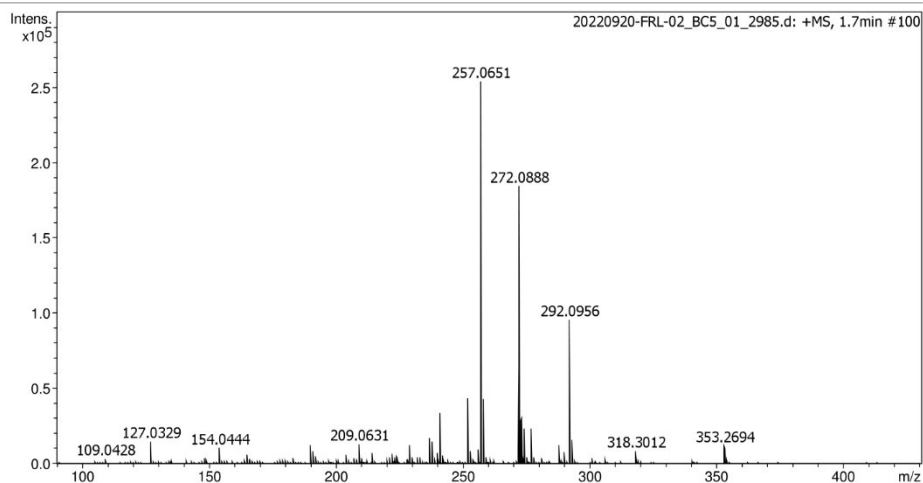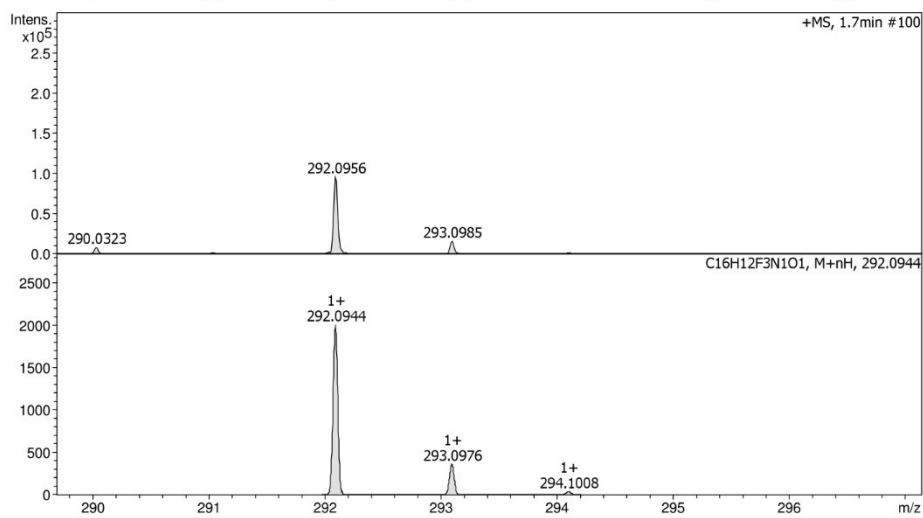

# HRMS (ESI) spectra of **3ae**

## Generic Display Report

|                      |                                                       |                  |                       |
|----------------------|-------------------------------------------------------|------------------|-----------------------|
| <b>Analysis Info</b> |                                                       | Acquisition Date | 26/09/2022 5:31:51 PM |
| Analysis Name        | D:\Data\2022MS\HJQ\0926\20220920-FRL-04_BC7_01_2988.d | Operator         | gftang                |
| Method               | tune_low_20-400_pos-icmsmin.m                         | Instrument       | micrOTOF              |
| Sample Name          | 20220920-FRL-04                                       |                  |                       |
| Comment              |                                                       |                  |                       |

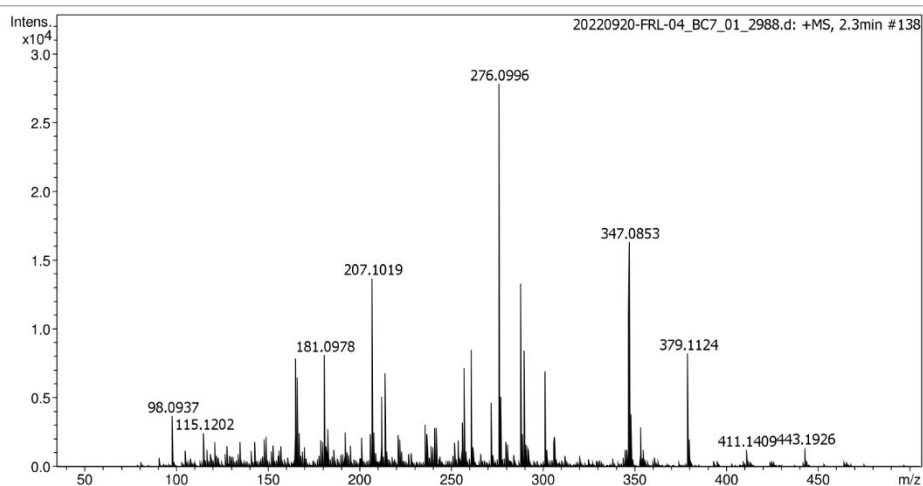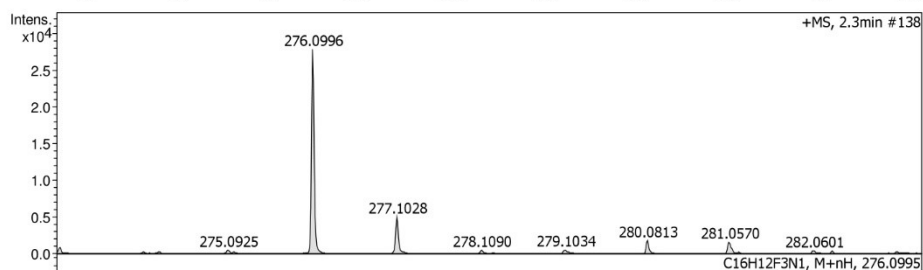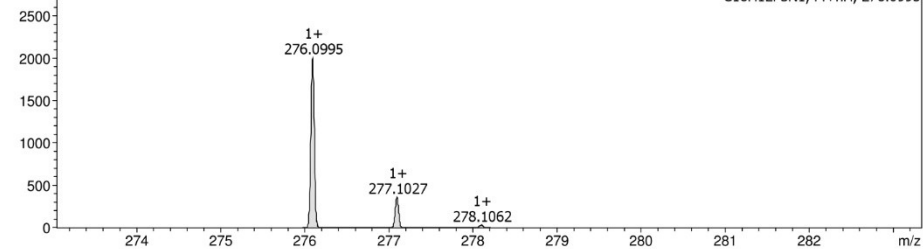



# HRMS (ESI) spectra of **3af**

## Generic Display Report

|                      |                                                       |                  |                       |
|----------------------|-------------------------------------------------------|------------------|-----------------------|
| <b>Analysis Info</b> |                                                       | Acquisition Date | 26/09/2022 5:42:45 PM |
| Analysis Name        | D:\Data\2022MS\HJQ\0926\20220920-FRL-05_BC8_01_2989.d | Operator         | gftang                |
| Method               | tune_low_20-400_pos-lcmsmin.m                         | Instrument       | micrOTOF              |
| Sample Name          | 20220920-FRL-05                                       |                  |                       |
| Comment              |                                                       |                  |                       |

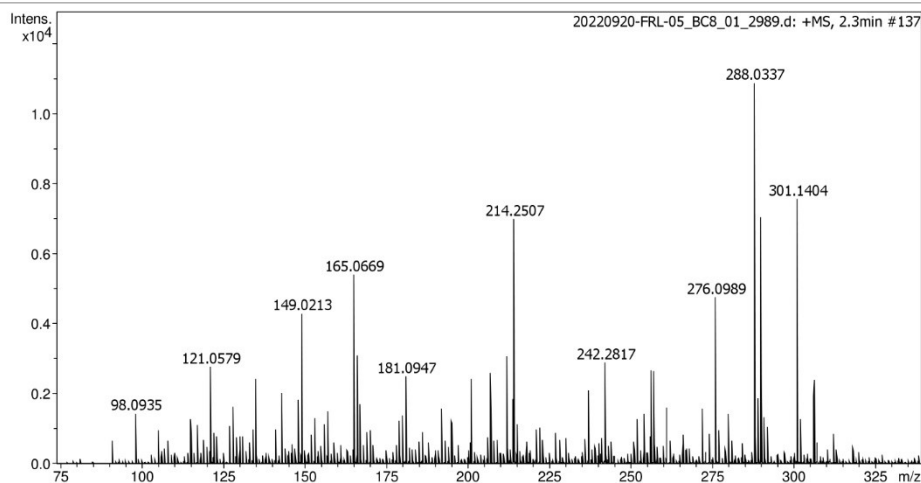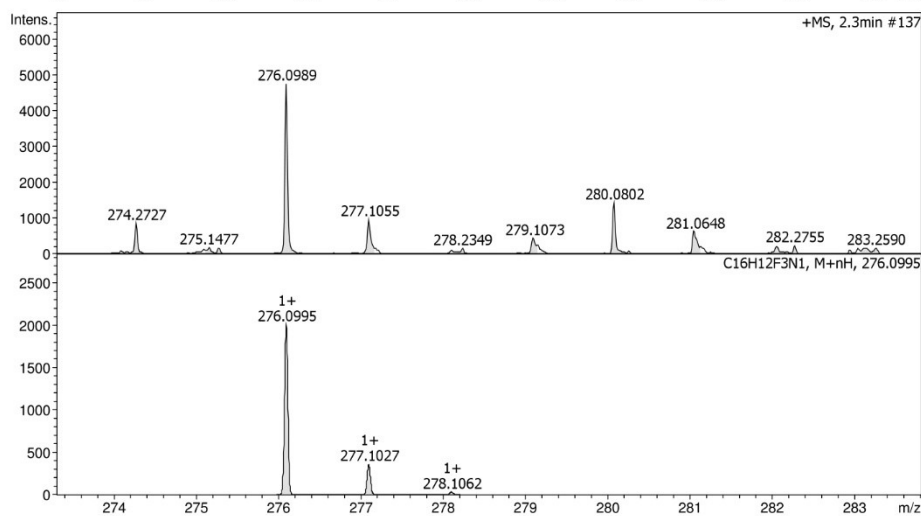

# HRMS (ESI) spectra of **3ag**

## Generic Display Report

**Analysis Info**  
Analysis Name: D:\Data\2022MS\HJQ\0926\20220920-FRL-06\_BD1\_01\_2990.d  
Method: tune\_low\_20-400\_pos-lcmsmin.m  
Sample Name: 20220920-FRL-06  
Comment:  
Acquisition Date: 26/09/2022 5:53:40 PM  
Operator: gftang  
Instrument: micrOTOF

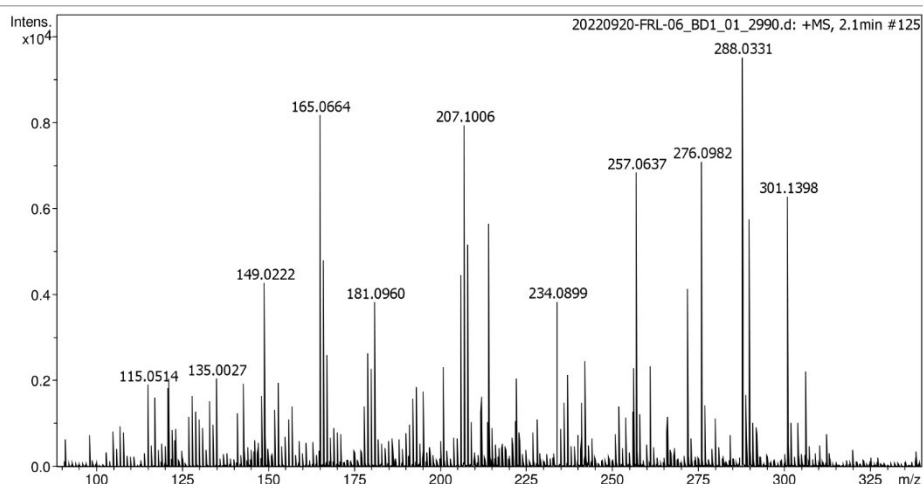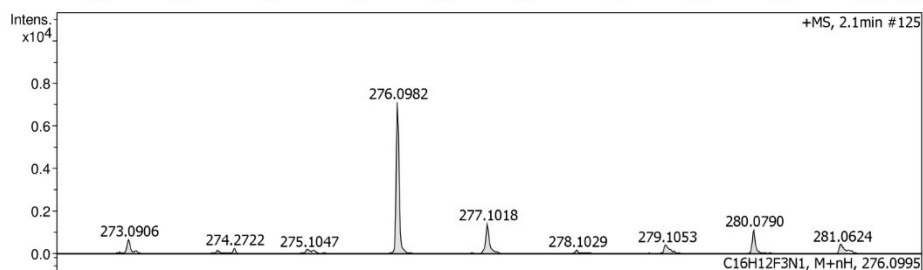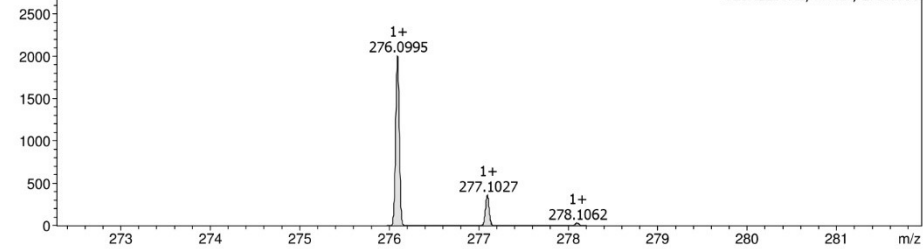

# HRMS (ESI) spectra of **3ah**

## Generic Display Report

|                      |                                                       |                  |                       |
|----------------------|-------------------------------------------------------|------------------|-----------------------|
| <b>Analysis Info</b> |                                                       | Acquisition Date | 26/09/2022 8:04:29 PM |
| Analysis Name        | D:\Data\2022MS\HJQ\0926\20220920-FRL-18_BE5_01_3002.d | Operator         | gftang                |
| Method               | tune_low_20-400_pos-icmsmin.m                         | Instrument       | micrOTOF              |
| Sample Name          | 20220920-FRL-18                                       |                  |                       |
| Comment              |                                                       |                  |                       |

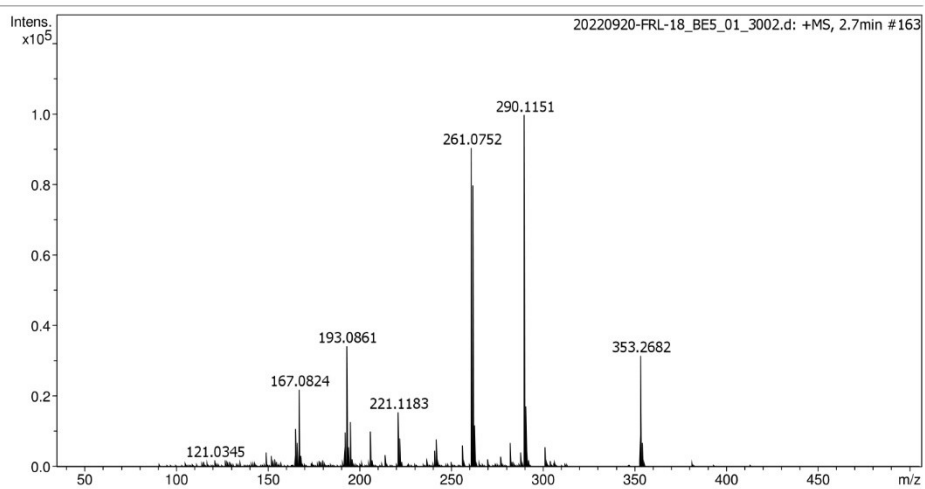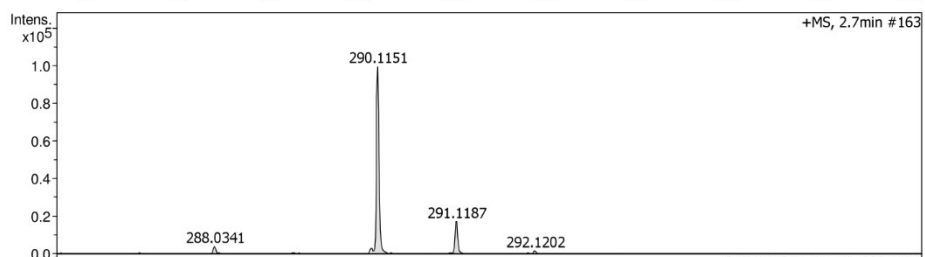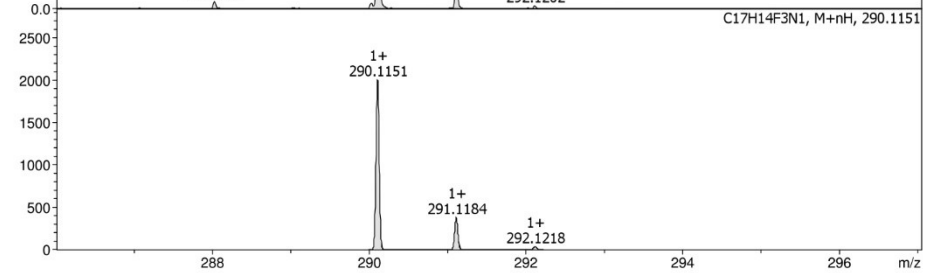

# HRMS (ESI) spectra of **3ai**

## Generic Display Report

|                      |                                                       |                  |                       |
|----------------------|-------------------------------------------------------|------------------|-----------------------|
| <b>Analysis Info</b> |                                                       | Acquisition Date | 26/09/2022 8:15:23 PM |
| Analysis Name        | D:\Data\2022MS\HJQ\0926\20220920-FRL-19_BE6_01_3003.d | Operator         | gftang                |
| Method               | tune_low_20-400_pos-icmsmin.m                         | Instrument       | micrOTOF              |
| Sample Name          | 20220920-FRL-19                                       |                  |                       |
| Comment              |                                                       |                  |                       |

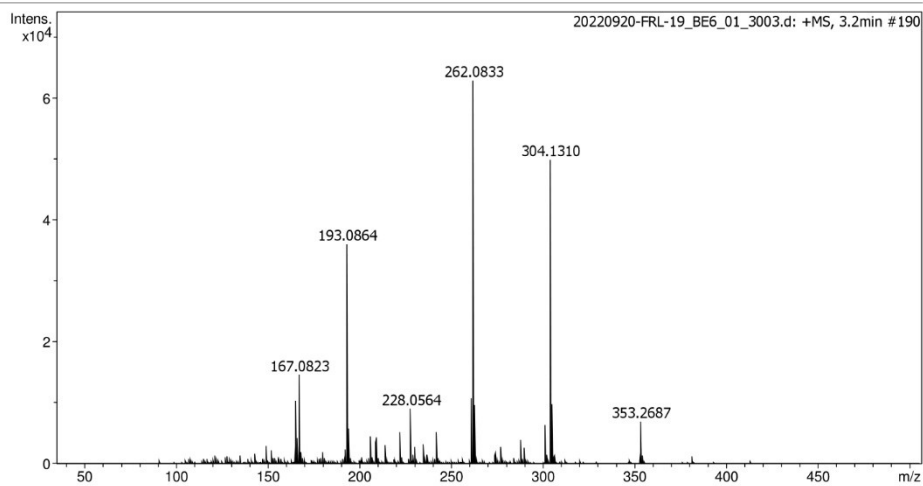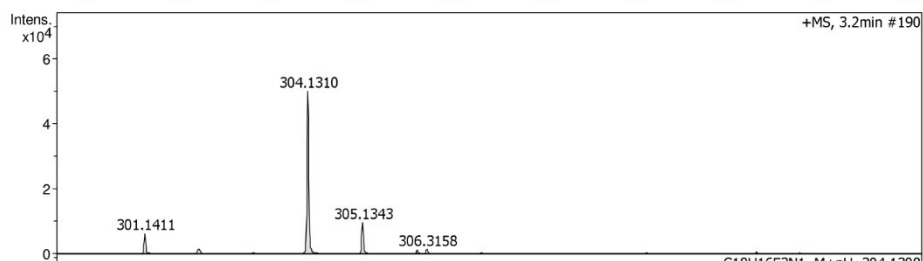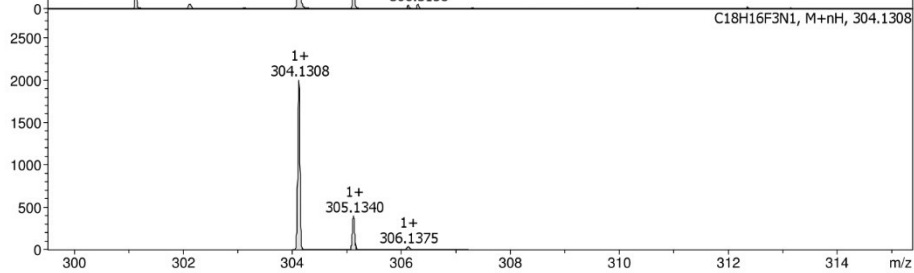

# HRMS (ESI) spectra of **3aj**

## Generic Display Report

|                      |                                                       |                       |          |
|----------------------|-------------------------------------------------------|-----------------------|----------|
| <b>Analysis Info</b> | Acquisition Date                                      | 26/09/2022 6:04:34 PM |          |
| Analysis Name        | D:\Data\2022MS\HJQ\0926\20220920-FRL-07_BD2_01_2991.d |                       |          |
| Method               | tune_low_20-400_pos-lcmsmin.m                         | Operator              | gftang   |
| Sample Name          | 20220920-FRL-07                                       | Instrument            | micrOTOF |
| Comment              |                                                       |                       |          |

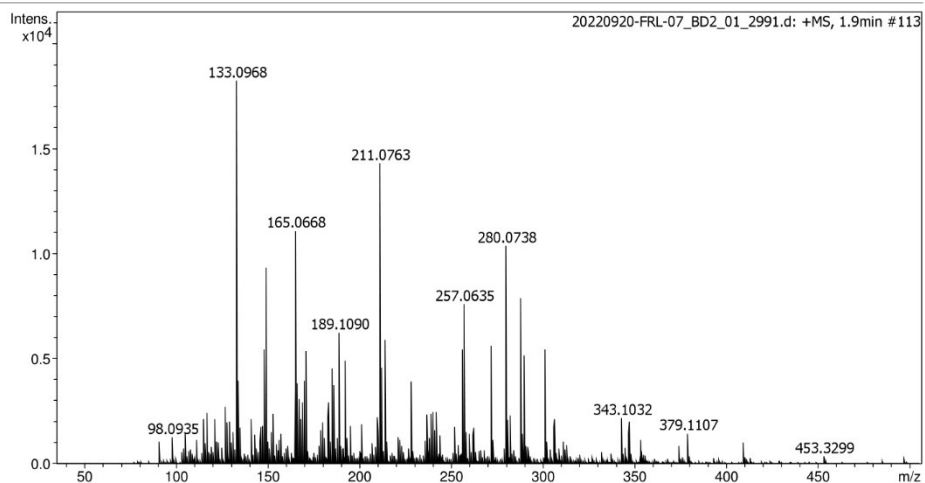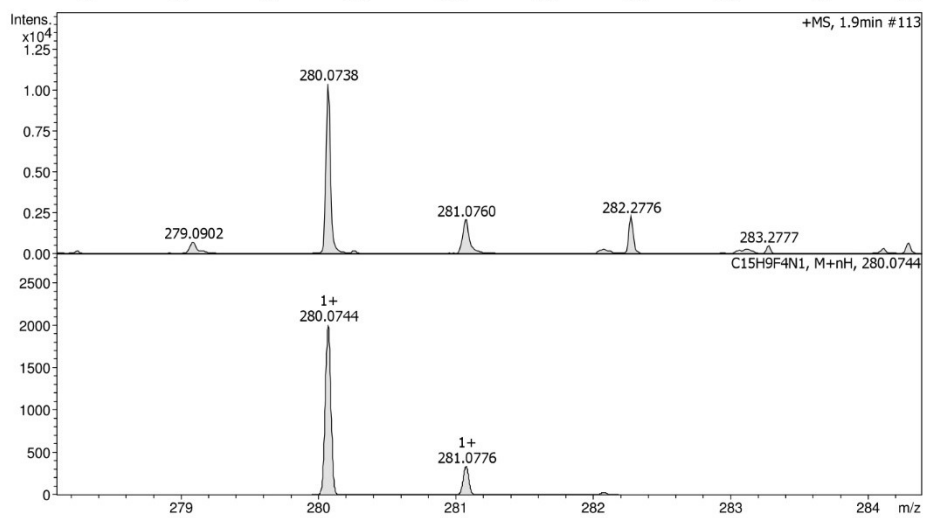

# HRMS (ESI) spectra of **3ak**

## Generic Display Report

**Analysis Info**  
Analysis Name: D:\Data\2022MS\HJQ\0926\20220920-FRL-08\_BD3\_01\_2992.d  
Method: tune\_low\_20-400\_pos-icmsmin.m  
Sample Name: 20220920-FRL-08  
Comment:  
Acquisition Date: 26/09/2022 6:15:27 PM  
Operator: gftang  
Instrument: micrOTOF

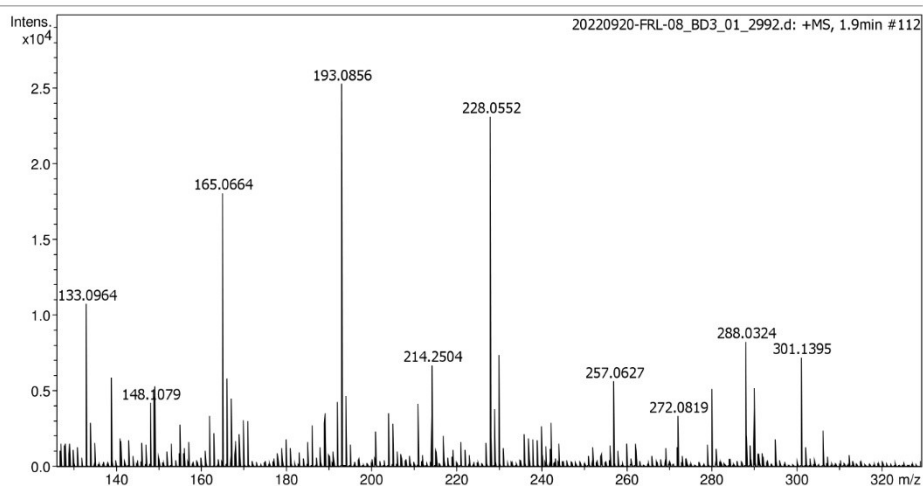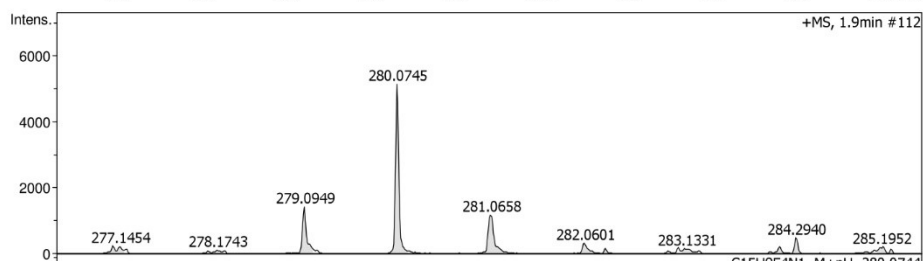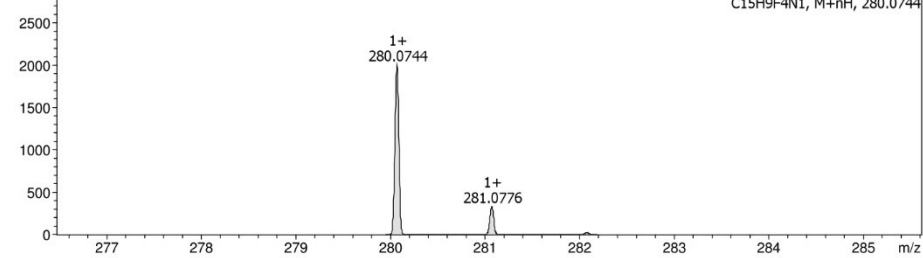

# HRMS (ESI) spectra of **3al**

## Generic Display Report

**Analysis Info**  
Analysis Name: D:\Data\2022MS\HJQ\0926\20220920-FRL-09\_BD4\_01\_2993.d  
Method: tune\_low\_20-400\_pos-lcmsmin.m  
Sample Name: 20220920-FRL-09  
Comment:  
Acquisition Date: 26/09/2022 6:26:23 PM  
Operator: gftang  
Instrument: micrOTOF

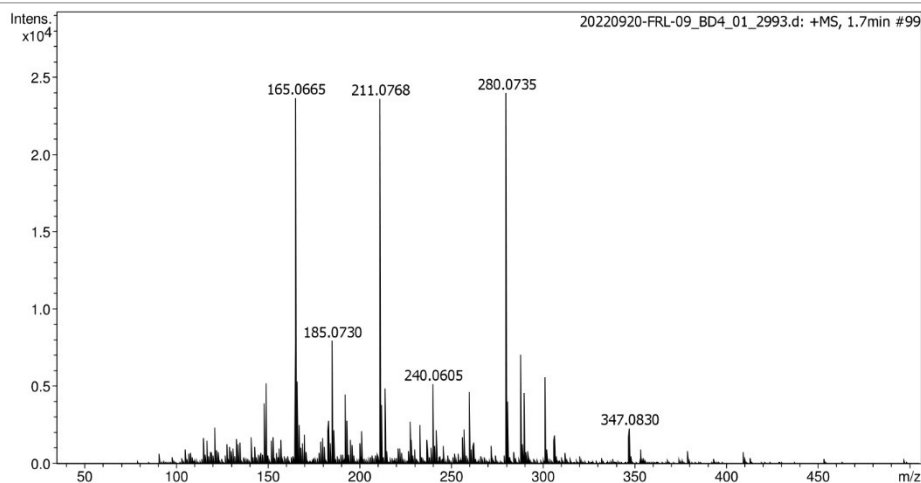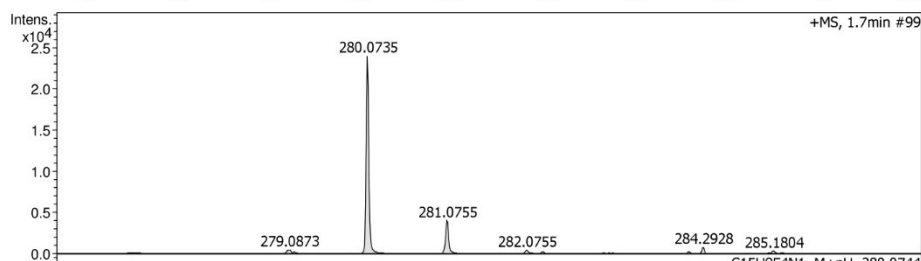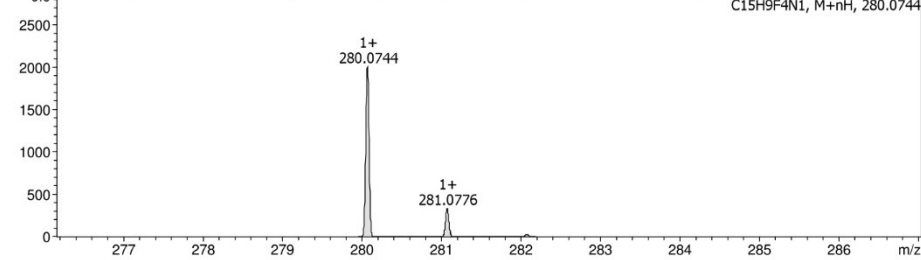

# HRMS (ESI) spectra of **3am**

## Generic Display Report

**Analysis Info**  
Analysis Name: D:\Data\2022MS\HJQ\0926\20220920-FRL-10\_BD5\_01\_2994.d  
Method: tune\_low\_20-400\_pos-lcmsmin.m  
Sample Name: 20220920-FRL-10  
Comment:  
Acquisition Date: 26/09/2022 6:37:16 PM  
Operator: gftang  
Instrument: micrOTOF

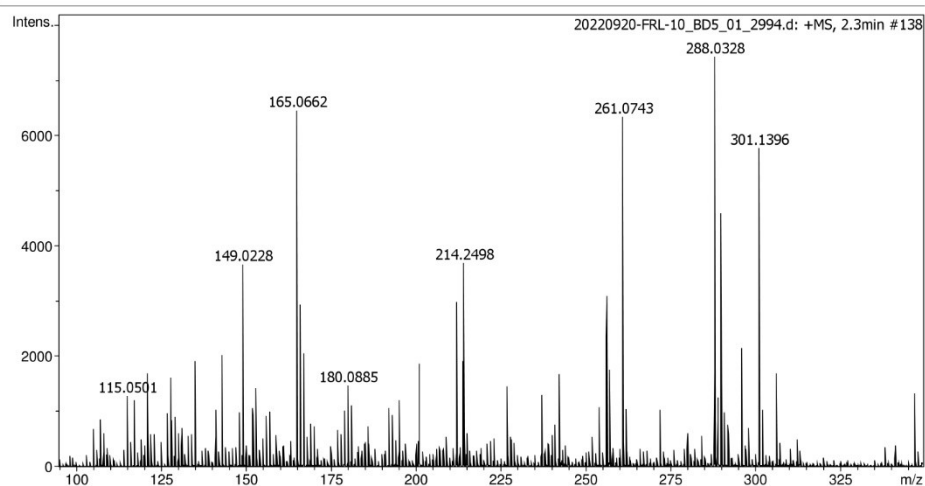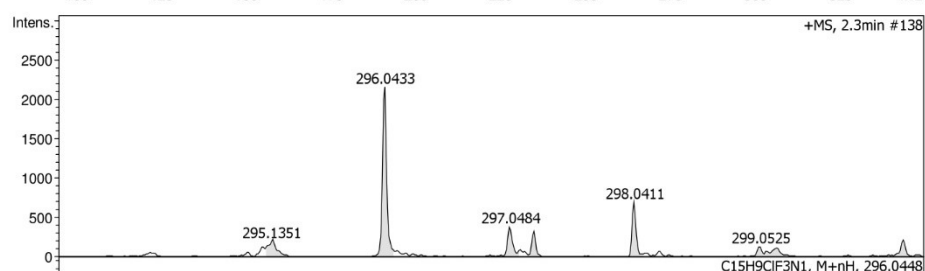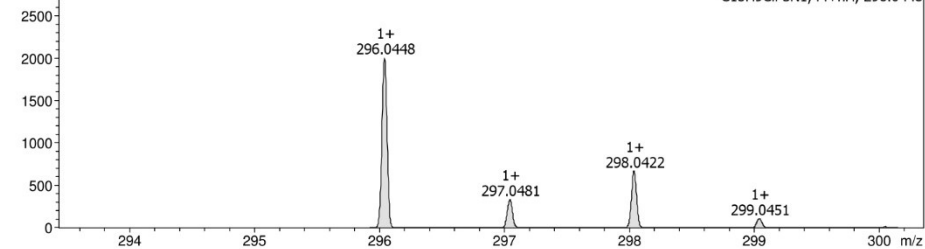



# HRMS (ESI) spectra of **3an**

## Generic Display Report

**Analysis Info**  
Analysis Name: D:\Data\2022MS\HJQ\0926\20220920-FRL-11\_BD6\_01\_2995.d  
Method: tune\_low\_20-400\_pos-lcmsmin.m  
Sample Name: 20220920-FRL-11  
Comment:  
Acquisition Date: 26/09/2022 6:48:11 PM  
Operator: gftang  
Instrument: micrOTOF

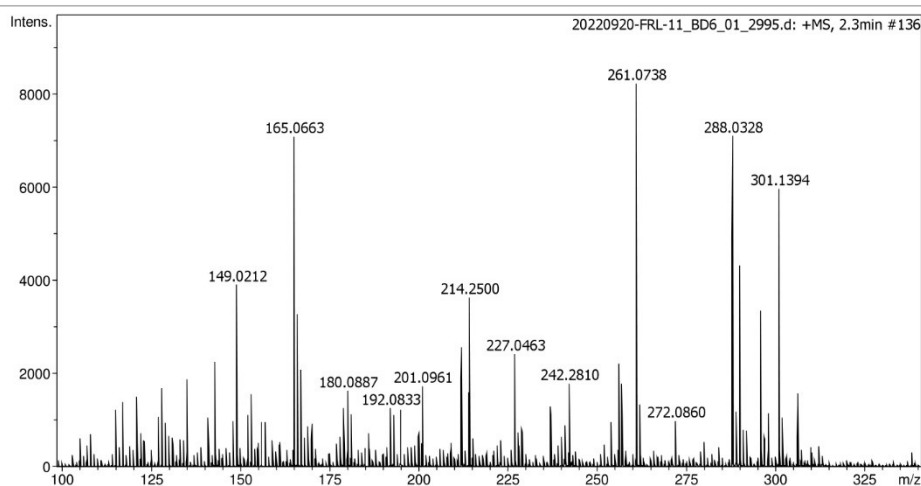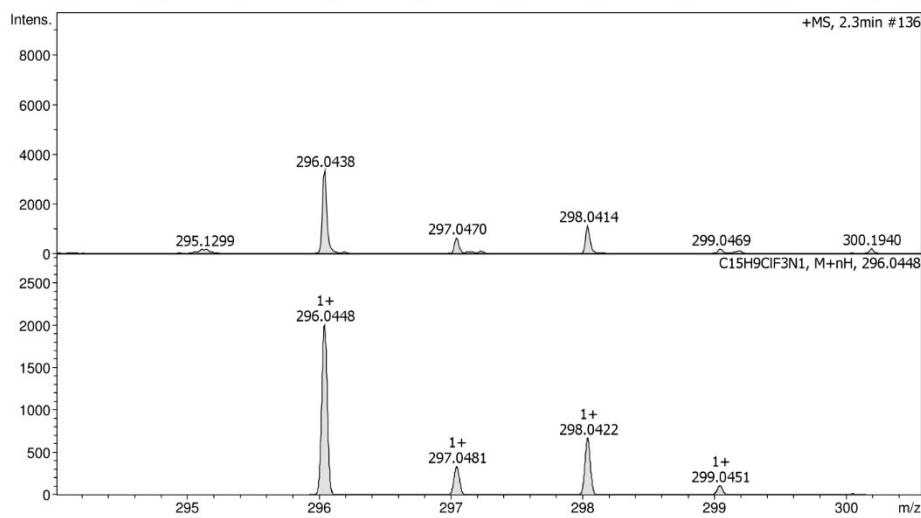

# HRMS (ESI) spectra of **3ao**

## Generic Display Report

|                      |                                                       |                  |                       |
|----------------------|-------------------------------------------------------|------------------|-----------------------|
| <b>Analysis Info</b> |                                                       | Acquisition Date | 26/09/2022 6:59:04 PM |
| Analysis Name        | D:\Data\2022MS\HJQ\0926\20220920-FRL-12_BD7_01_2996.d | Operator         | gftang                |
| Method               | tune_low_20-400_pos-lcmsmin.m                         | Instrument       | micrOTOF              |
| Sample Name          | 20220920-FRL-12                                       |                  |                       |
| Comment              |                                                       |                  |                       |

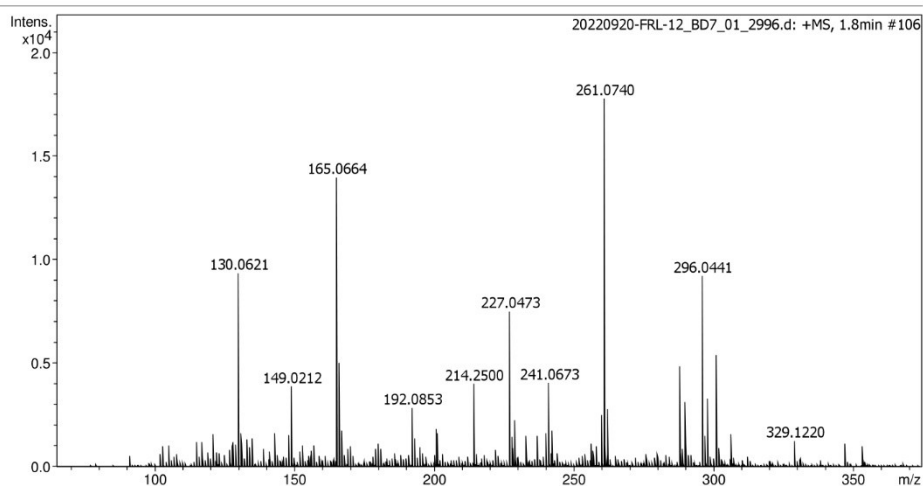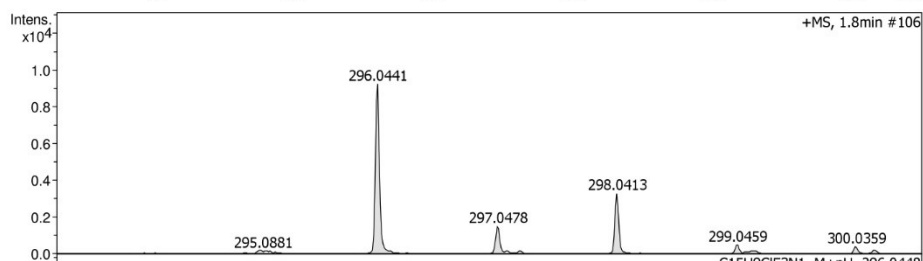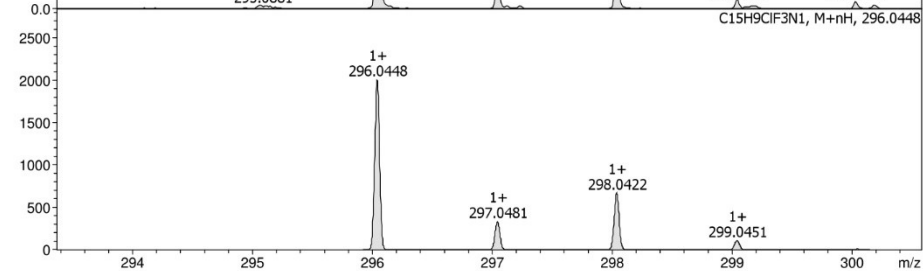

# HRMS (ESI) spectra of **3ap**

## Generic Display Report

**Analysis Info**  
Analysis Name: D:\Data\2022MS\HJQ\0926\20220920-FRL-13\_BD8\_01\_2997.d  
Method: tune\_low\_20-400\_pos-lcmsmin.m  
Sample Name: 20220920-FRL-13  
Comment:  
Acquisition Date: 26/09/2022 7:09:58 PM  
Operator: gftang  
Instrument: micrOTOF

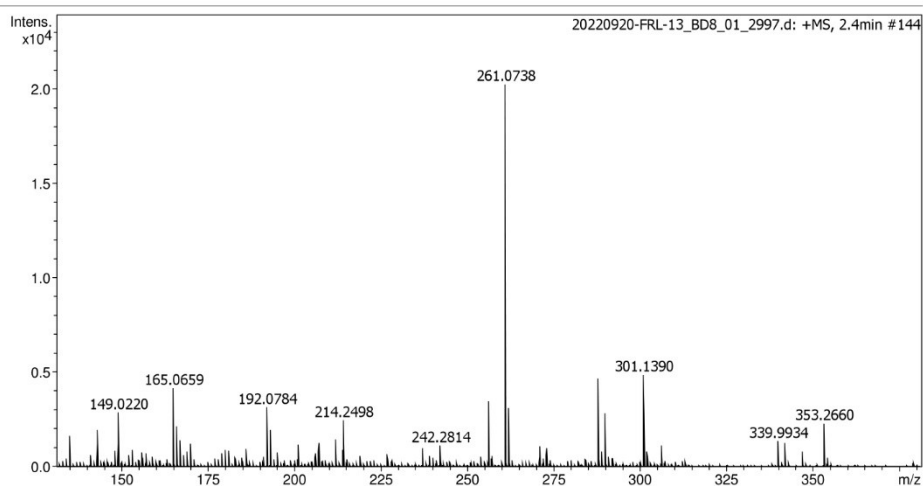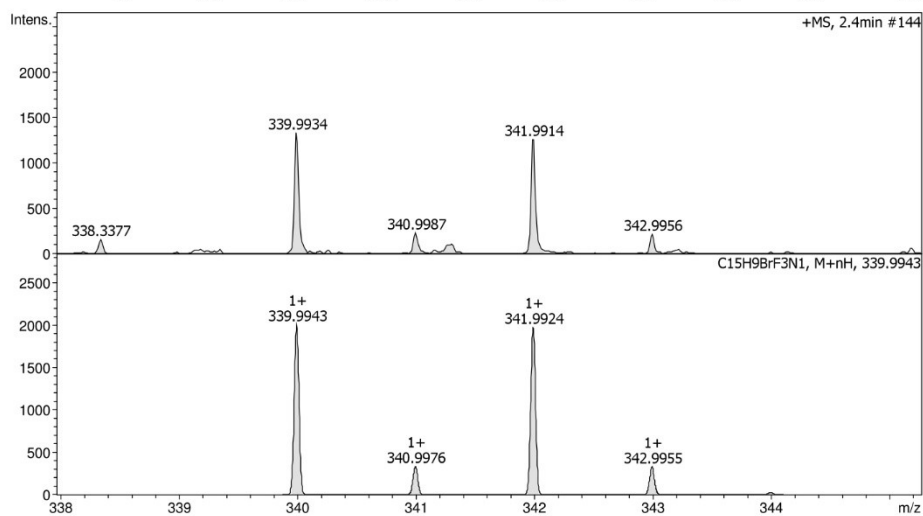

# HRMS (ESI) spectra of **3aq**

## Generic Display Report

|                      |                                                       |                  |                       |
|----------------------|-------------------------------------------------------|------------------|-----------------------|
| <b>Analysis Info</b> |                                                       | Acquisition Date | 26/09/2022 7:20:52 PM |
| Analysis Name        | D:\Data\2022MS\HJQ\0926\20220920-FRL-14_BE1_01_2998.d | Operator         | gftang                |
| Method               | tune_low_20-400_pos-lcmsmin.m                         | Instrument       | micrOTOF              |
| Sample Name          | 20220920-FRL-14                                       |                  |                       |
| Comment              |                                                       |                  |                       |

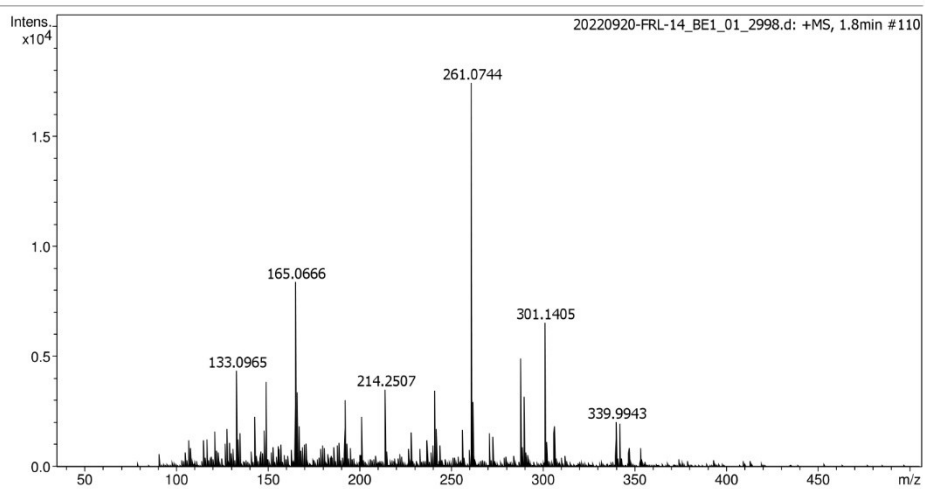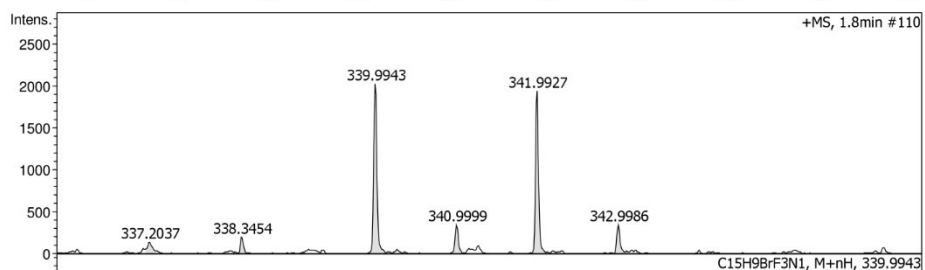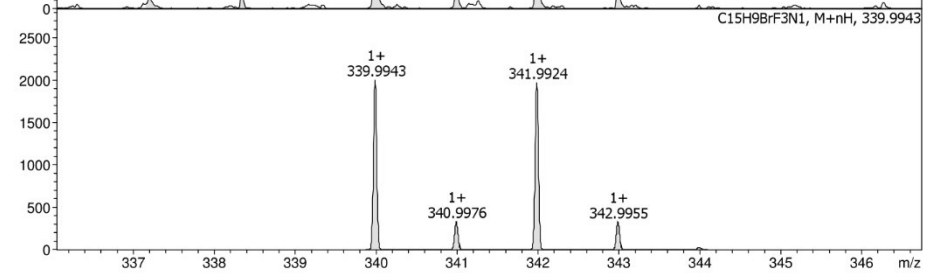

# HRMS (ESI) spectra of **3ar**

## Generic Display Report

|                      |                                                       |                  |                       |
|----------------------|-------------------------------------------------------|------------------|-----------------------|
| <b>Analysis Info</b> |                                                       | Acquisition Date | 26/09/2022 7:53:35 PM |
| Analysis Name        | D:\Data\2022MS\HJQ\0926\20220920-FRL-17_BE4_01_3001.d | Operator         | gftang                |
| Method               | tune_low_20-400_pos-icmsmin.m                         | Instrument       | micrOTOF              |
| Sample Name          | 20220920-FRL-17                                       |                  |                       |
| Comment              |                                                       |                  |                       |

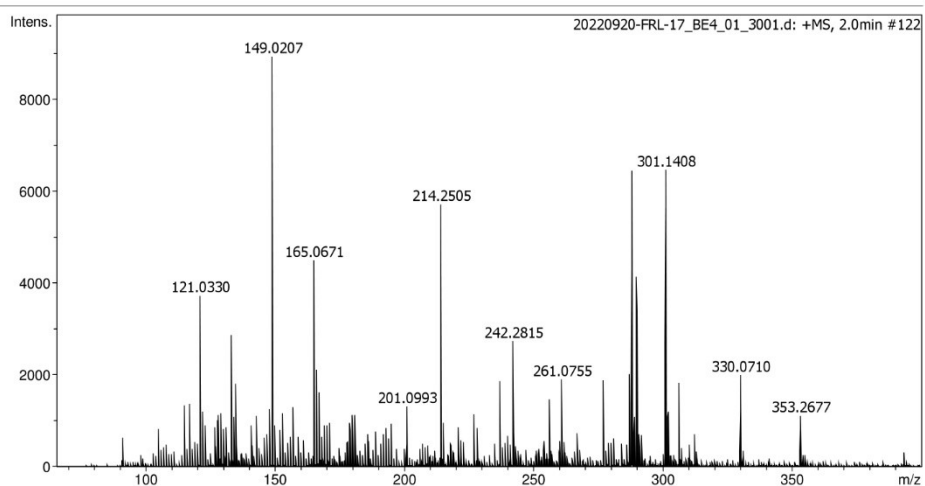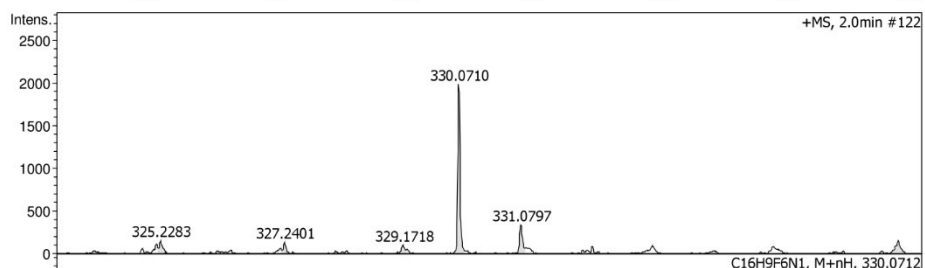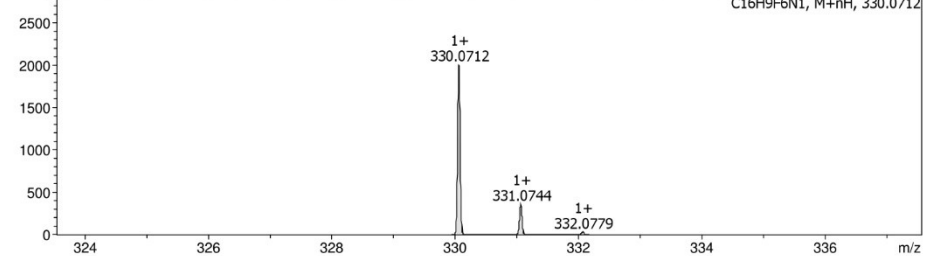

# HRMS (ESI) spectra of **3as**

## Generic Display Report

**Analysis Info**  
Analysis Name: D:\Data\2022MS\HJQ\0926\20220920-FRL-15\_BE2\_01\_2999.d  
Method: tune\_low\_20-400\_pos-lcmsmin.m  
Sample Name: 20220920-FRL-15  
Comment:  
Acquisition Date: 26/09/2022 7:31:47 PM  
Operator: gftang  
Instrument: micrOTOF

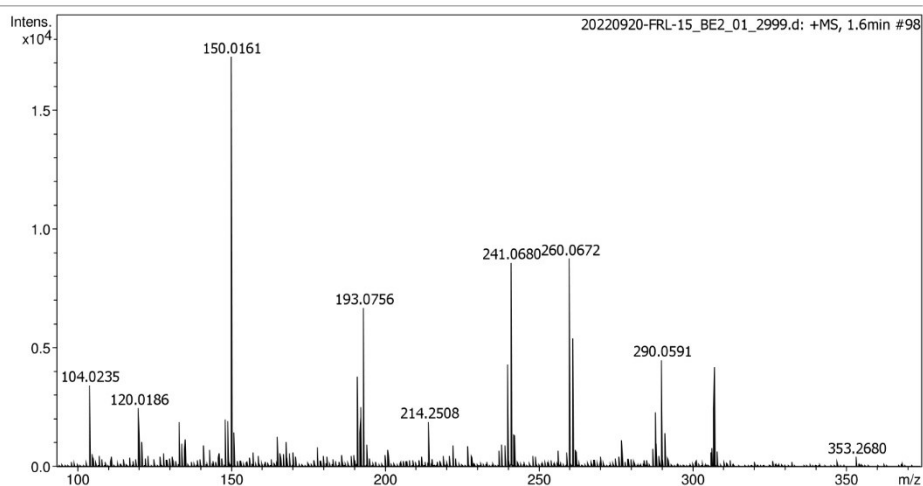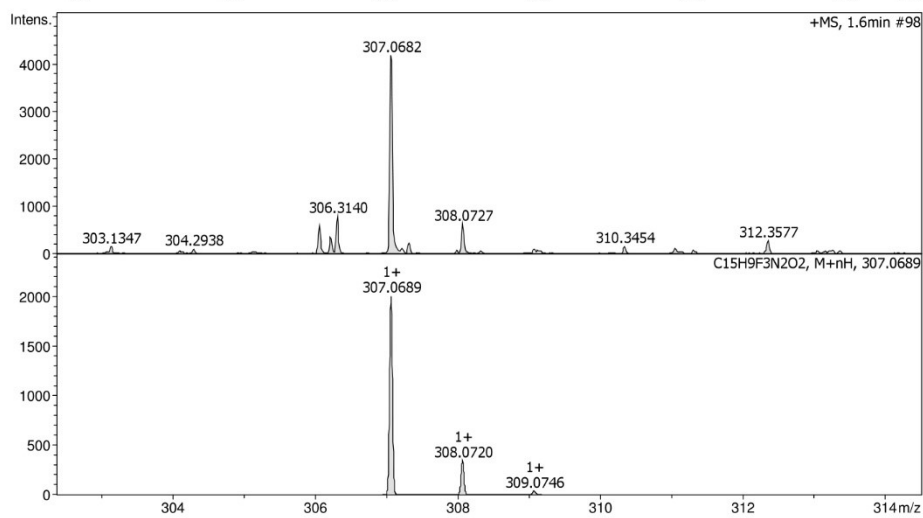

# HRMS (ESI) spectra of **3at**

## Generic Display Report

|                      |                                                       |                  |                       |
|----------------------|-------------------------------------------------------|------------------|-----------------------|
| <b>Analysis Info</b> |                                                       | Acquisition Date | 26/09/2022 7:42:42 PM |
| Analysis Name        | D:\Data\2022MS\HJQ\0926\20220920-FRL-16_BE3_01_3000.d | Operator         | gftang                |
| Method               | tune_low_20-400_pos-lcmsmin.m                         | Instrument       | micrOTOF              |
| Sample Name          | 20220920-FRL-16                                       |                  |                       |
| Comment              |                                                       |                  |                       |

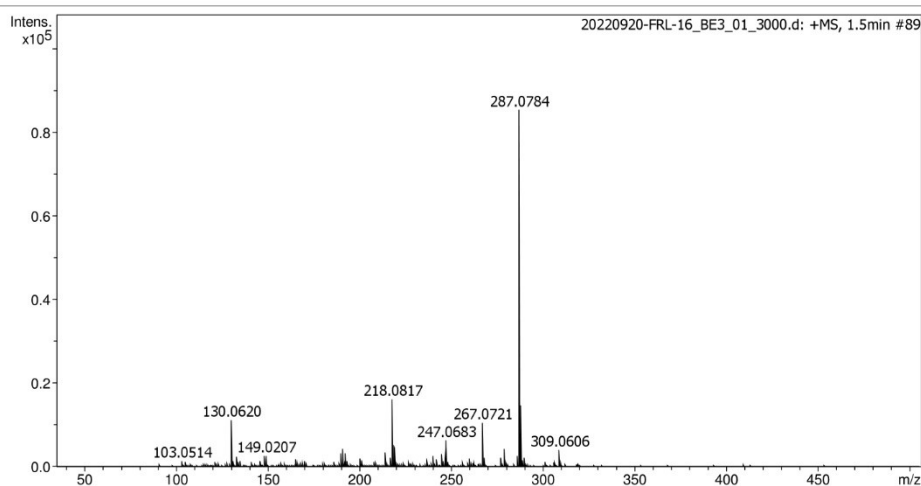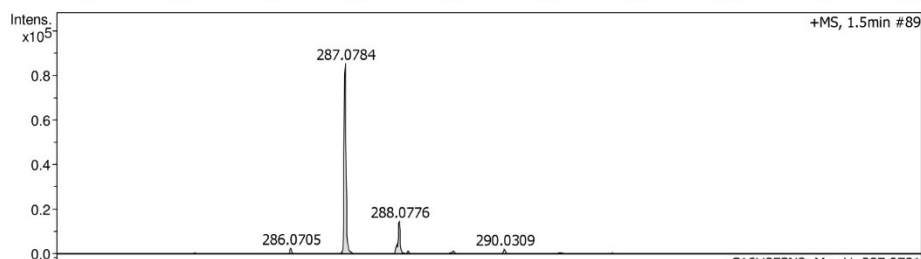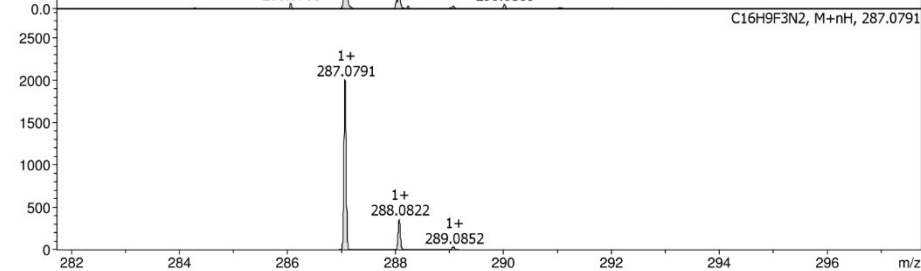

# HRMS (ESI) spectra of **3au**

## Generic Display Report

|                      |                                                       |                  |                       |
|----------------------|-------------------------------------------------------|------------------|-----------------------|
| <b>Analysis Info</b> |                                                       | Acquisition Date | 27/09/2022 9:18:05 AM |
| Analysis Name        | D:\Data\2022MS\HJQ\0926\20220920-FRL-31_RB2_01_3032.d | Operator         | gftang                |
| Method               | tune_low_200-800_pos-10min.m                          | Instrument       | micrOTOF              |
| Sample Name          | 20220920-FRL-31                                       |                  |                       |
| Comment              |                                                       |                  |                       |

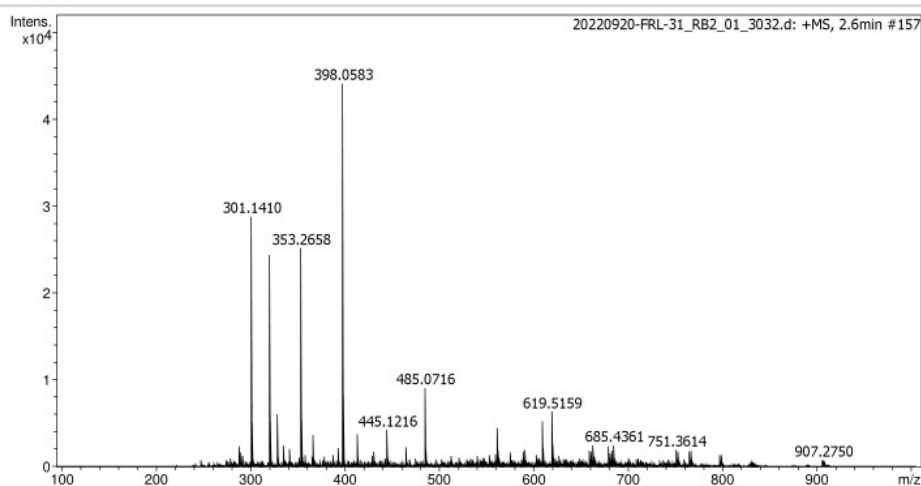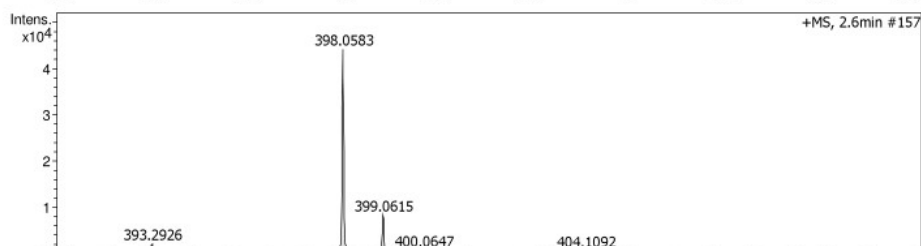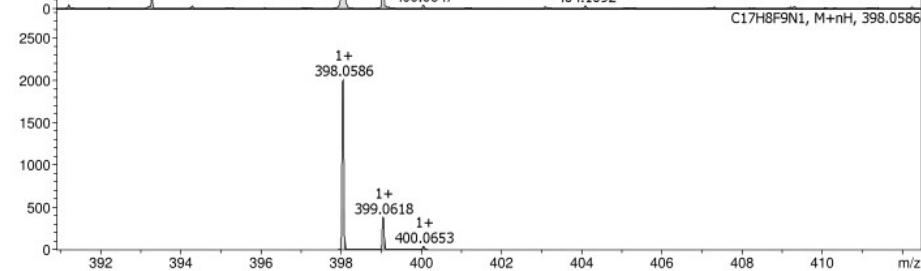



# HRMS (AP) spectra of **3av**

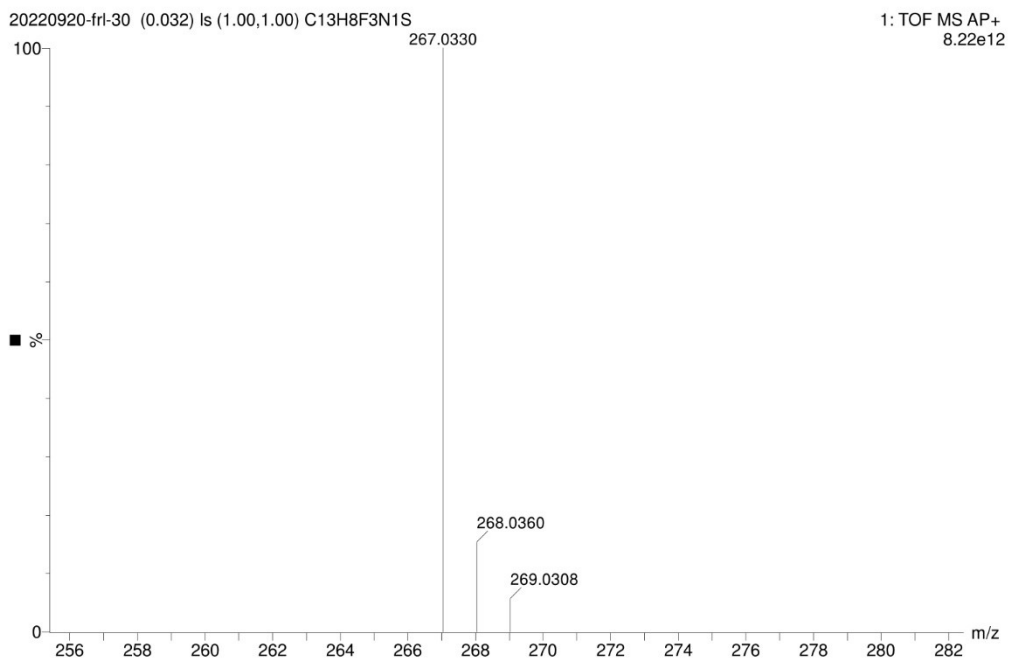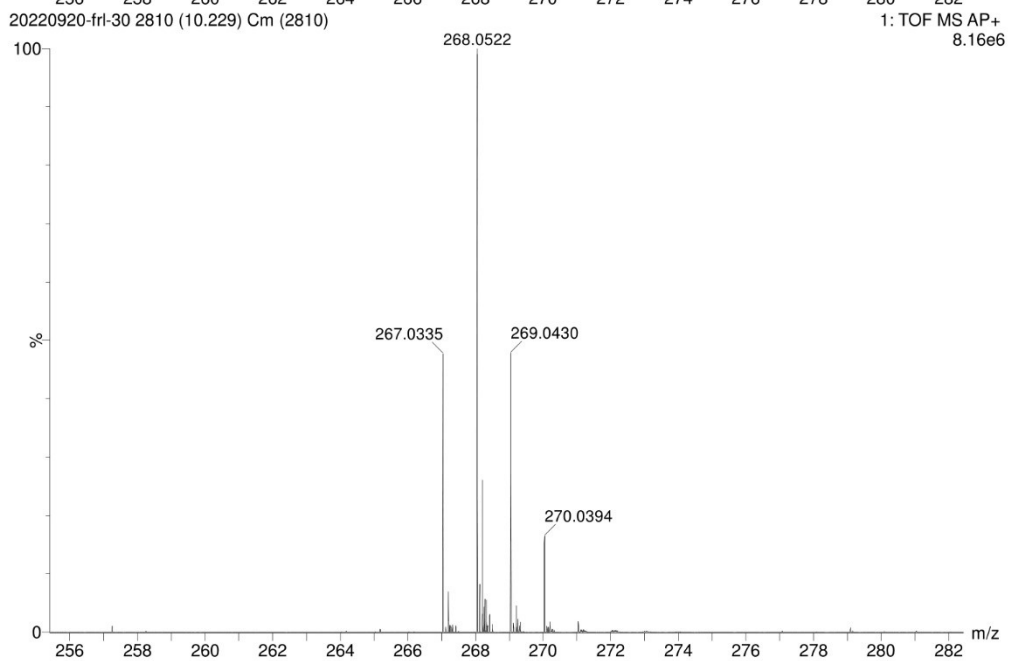

# HRMS (AP) spectra of **3aw**

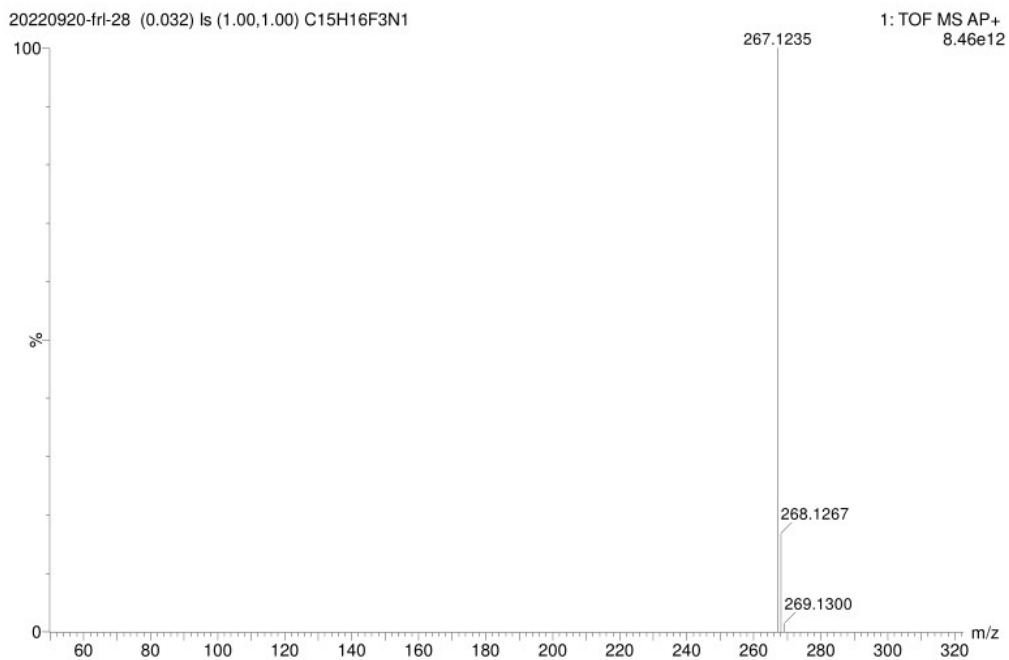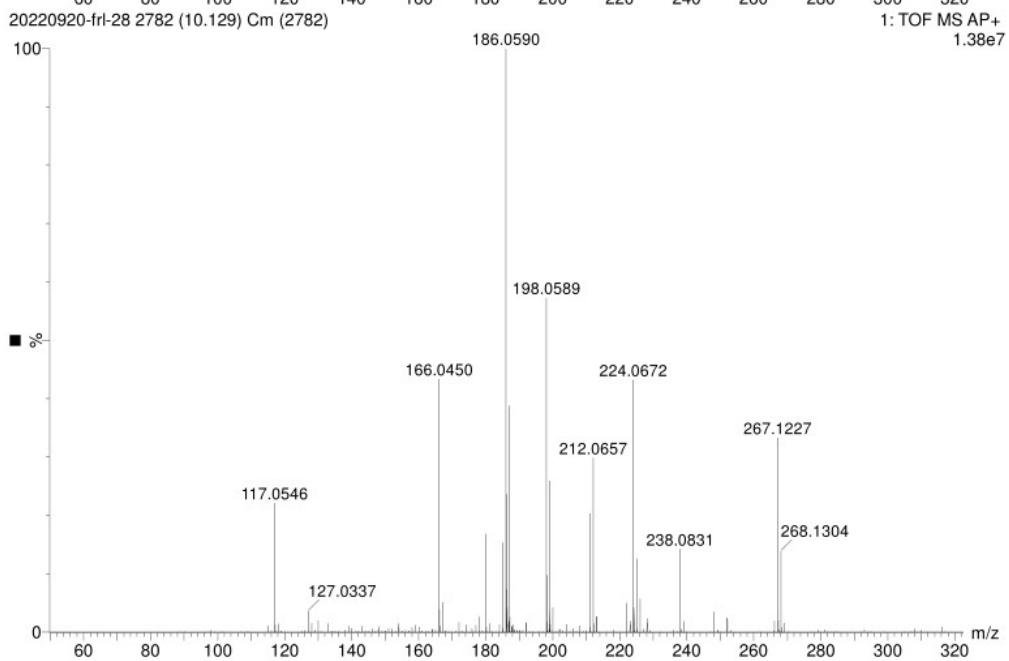

# HRMS (AP) spectra of **3ax**

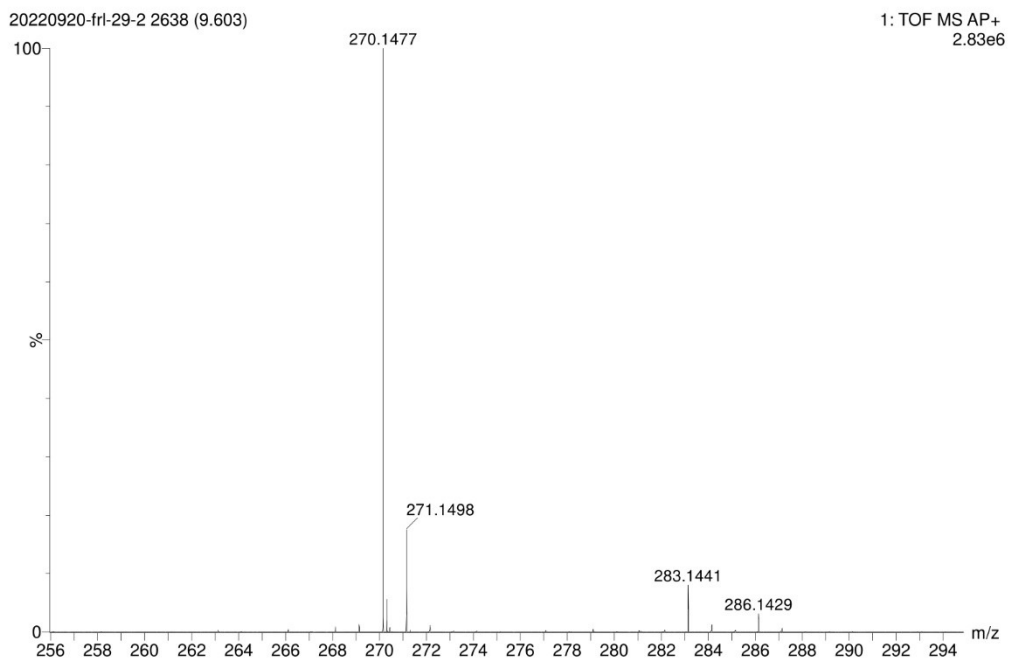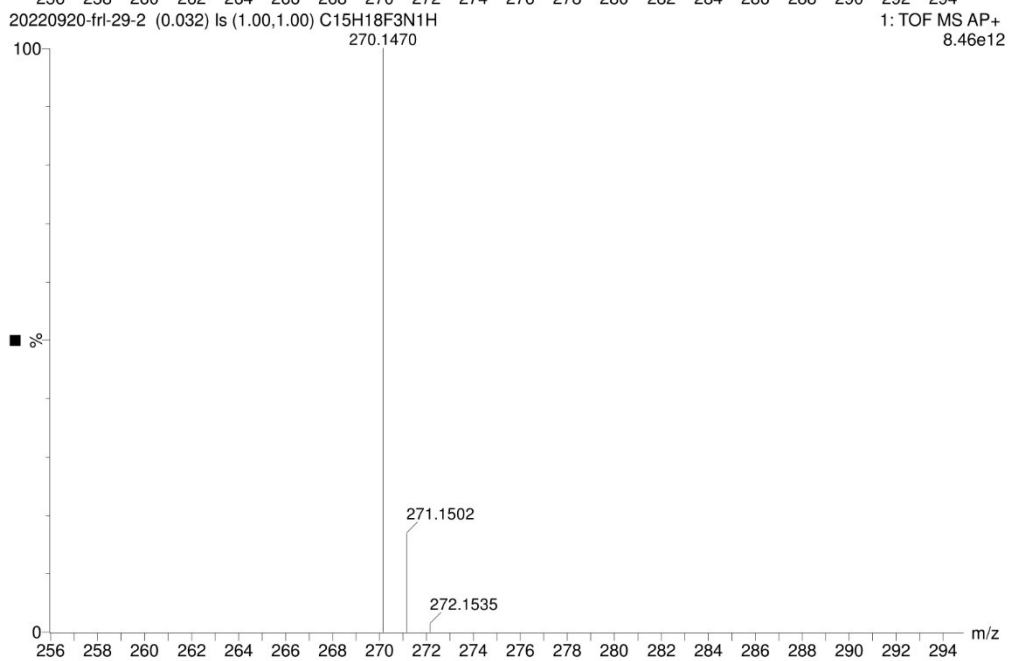

## HRMS (AP) spectra of **3ay**

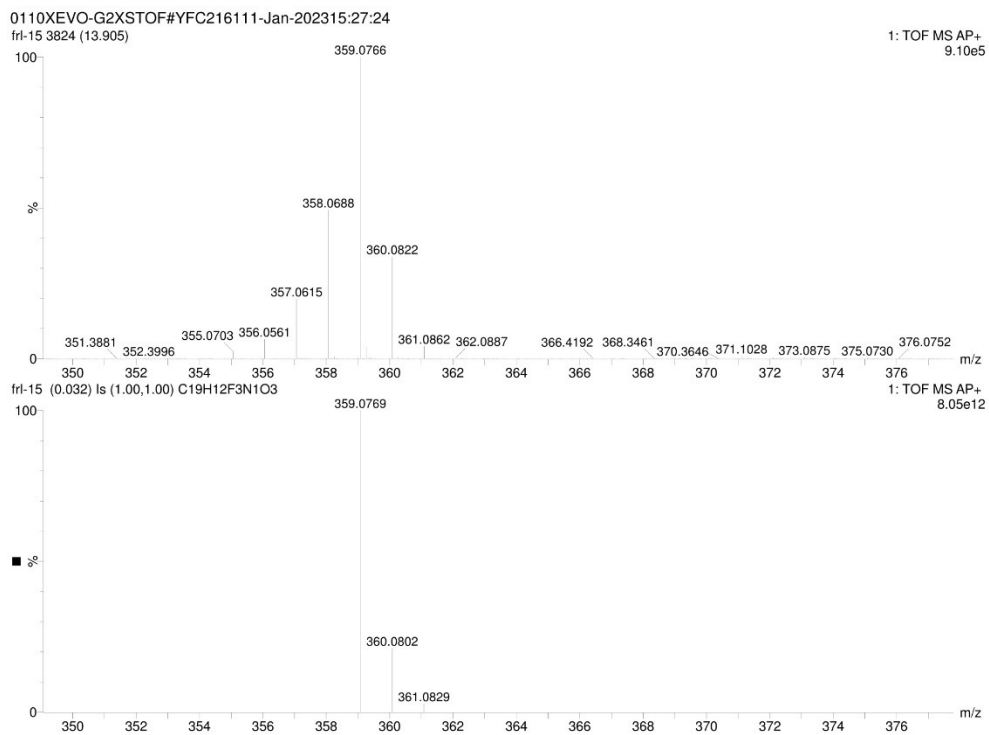

## HRMS (AP) spectra of **3az**

20230602-wcb-2 3280 (11.930) Cm (3279:3284-3209:3227)

1: TOF MSAP+  
2.09e7

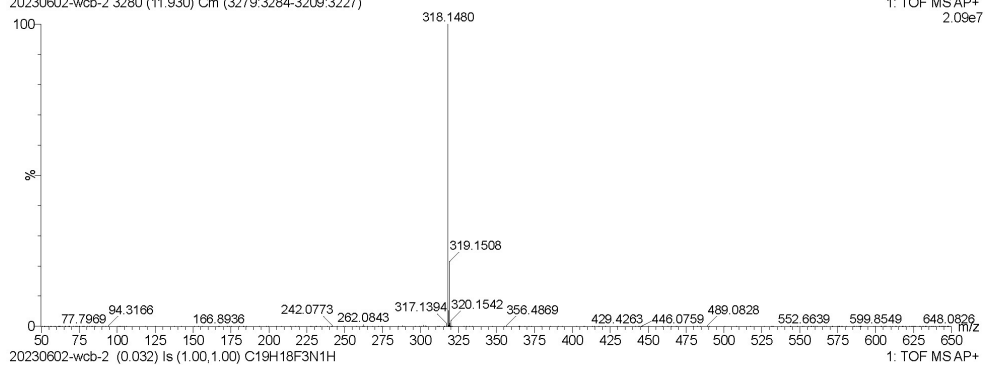

20230602-wcb-2 (0.032) Is (1.00,1.00) C19H18F3N1H

1: TOF MSAP+  
8.10e12

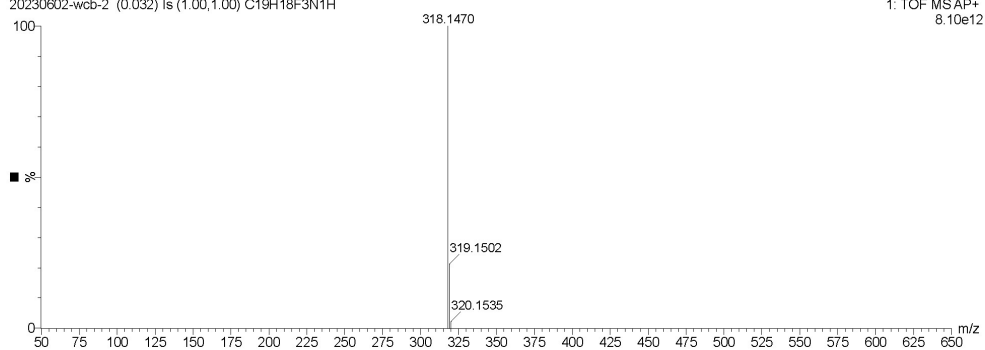

## RMS (AP) spectra of **3aa'**

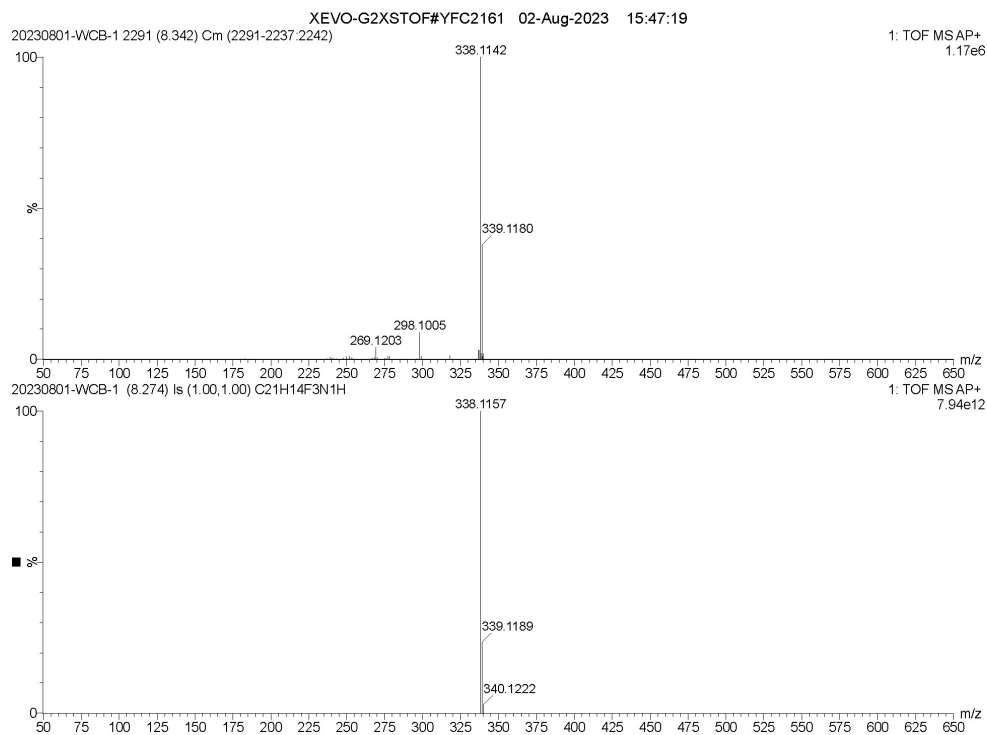

## HRMS (AP) spectra of **3ab'**

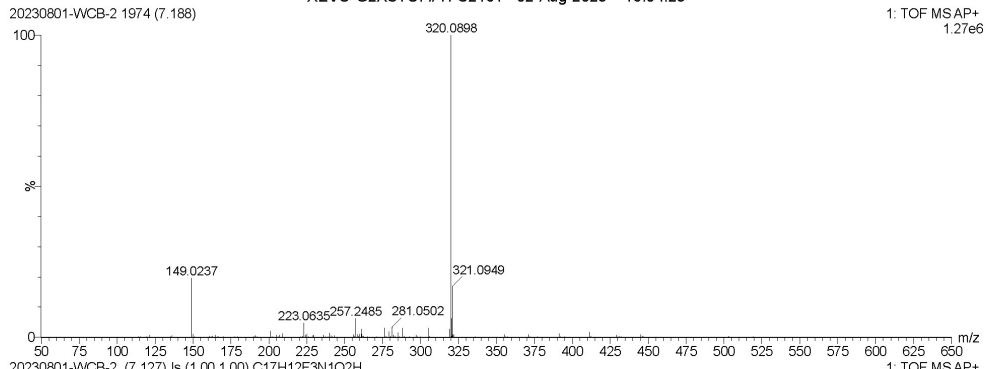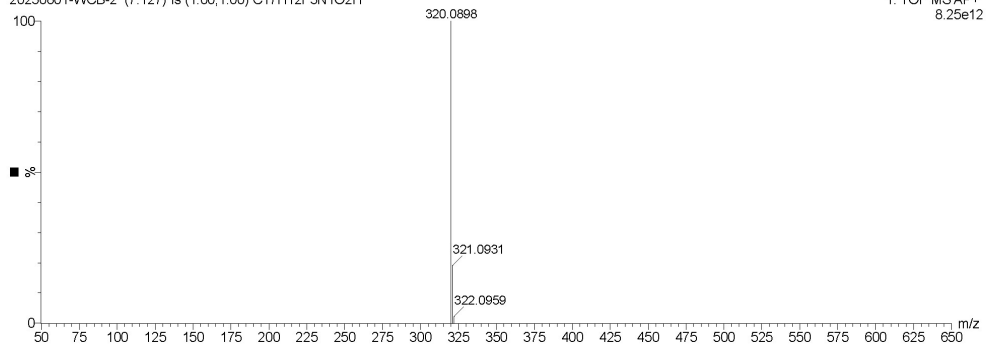

## HRMS (AP) spectra of **3ac'**

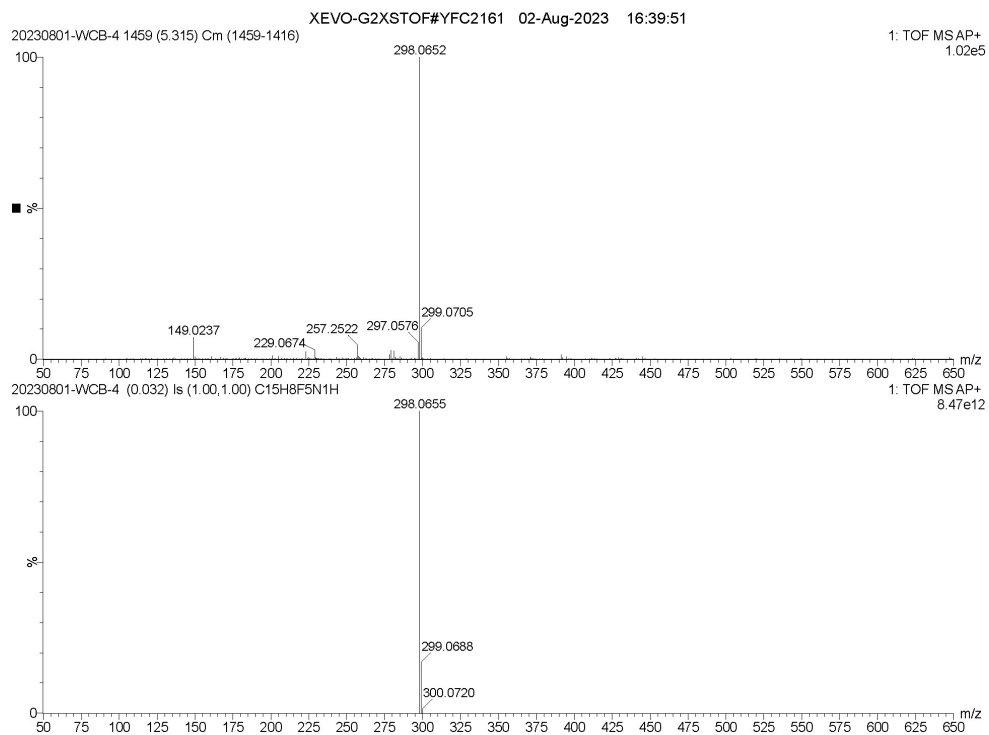

## HRMS (AP) spectra of **3ad'**



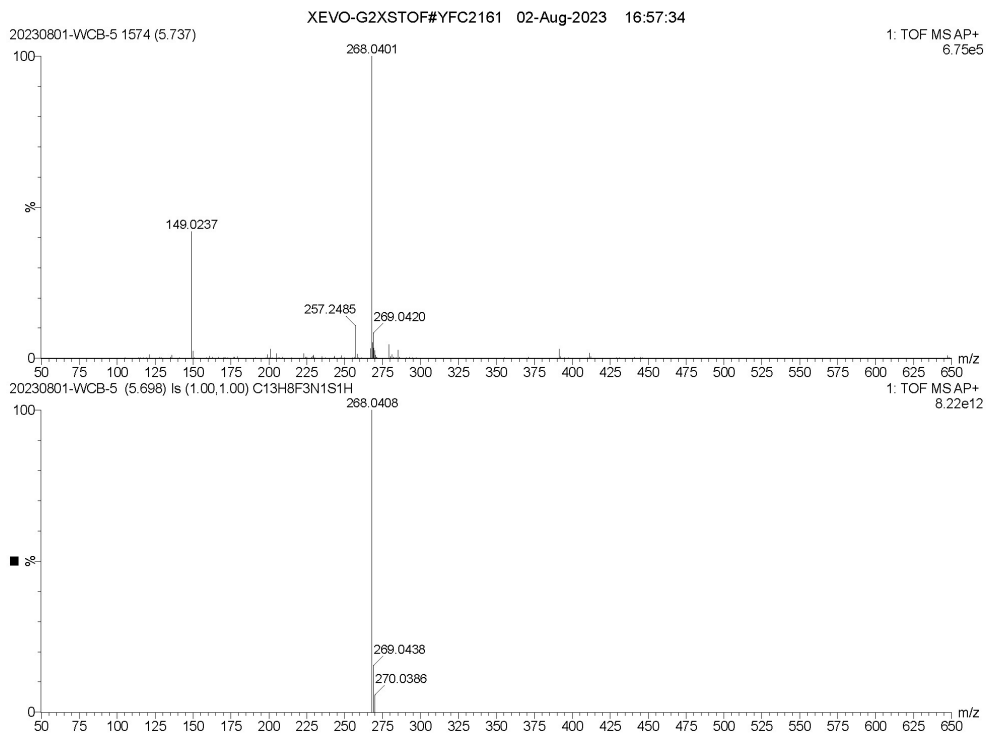

## HRMS (AP) spectra of **3ae'**

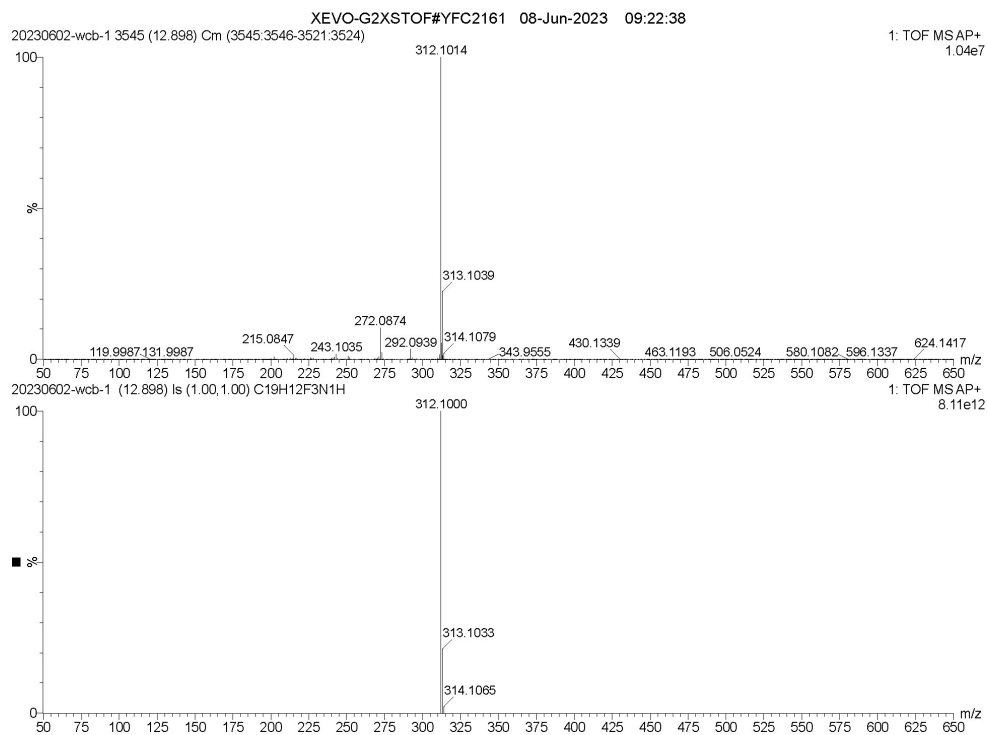

## HRMS (AP) spectra of **3af'**

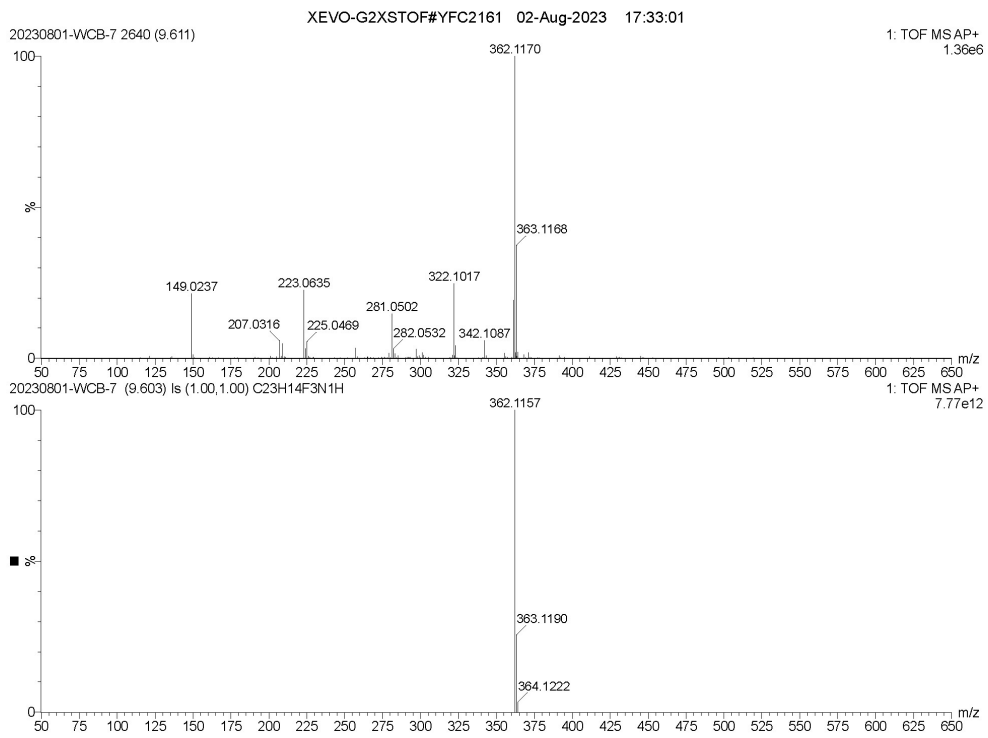

## HRMS (AP) spectra of **3ag'**

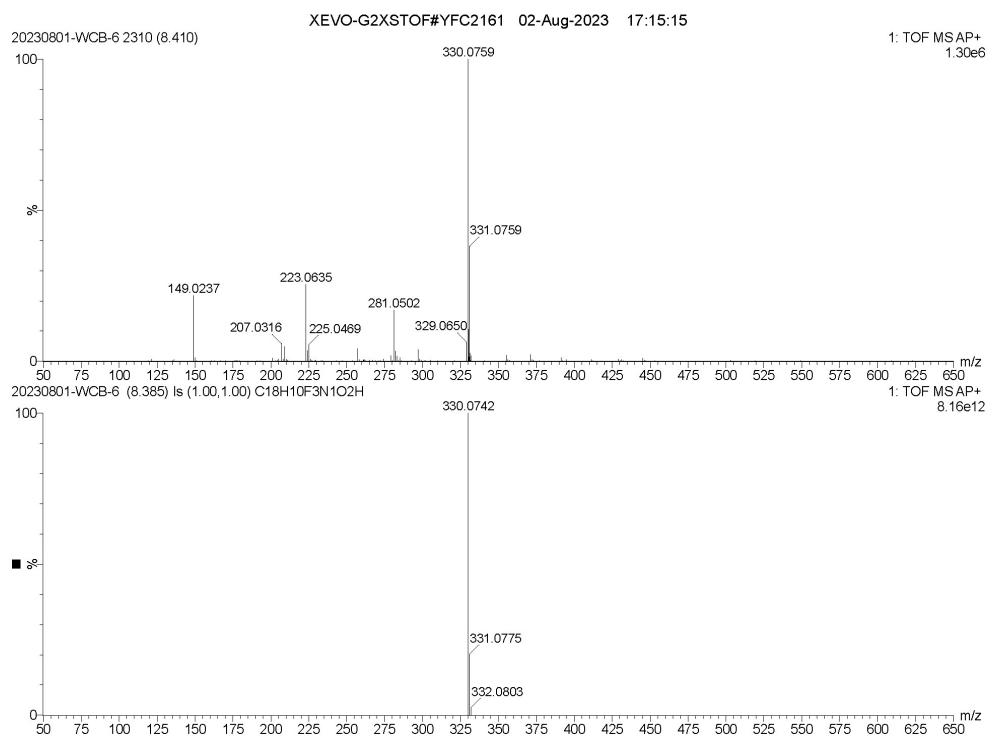

## HRMS (AP) spectra of **3ba**

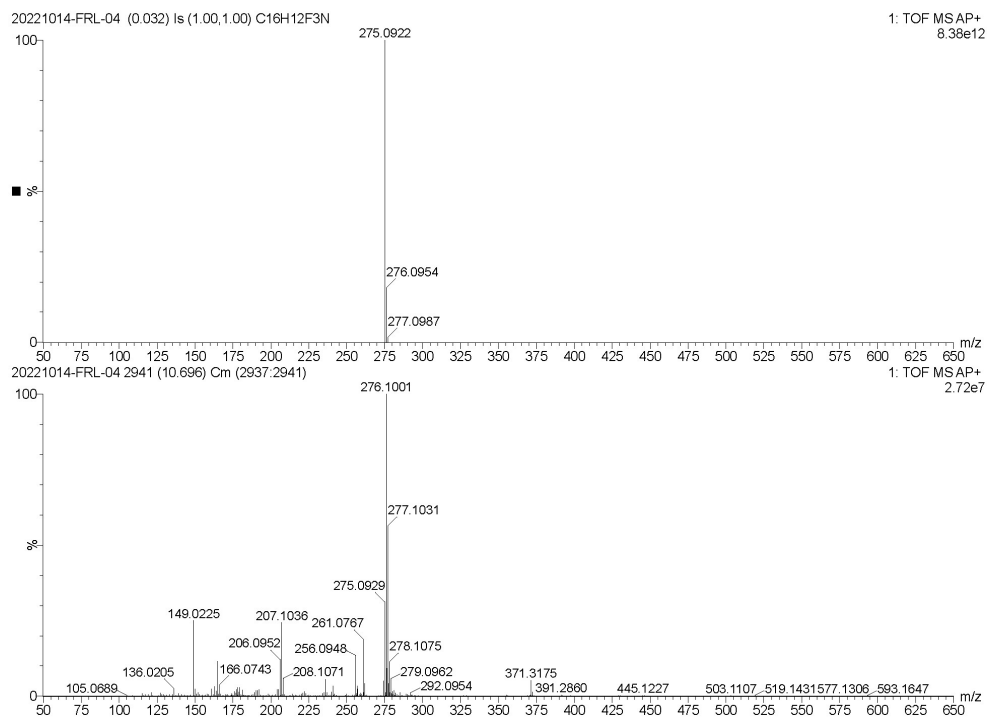

# HRMS (ESI) spectra of **3bb**

## Generic Display Report

**Analysis Info**  
Analysis Name: D:\Data\2022MS\HJQ\0926\20220920-FRL-20\_BE7\_01\_3004.d  
Method: tune\_low\_20-400\_pos-icmsmin.m  
Sample Name: 20220920-FRL-20  
Comment:  
Acquisition Date: 26/09/2022 8:26:17 PM  
Operator: gftang  
Instrument: micrOTOF

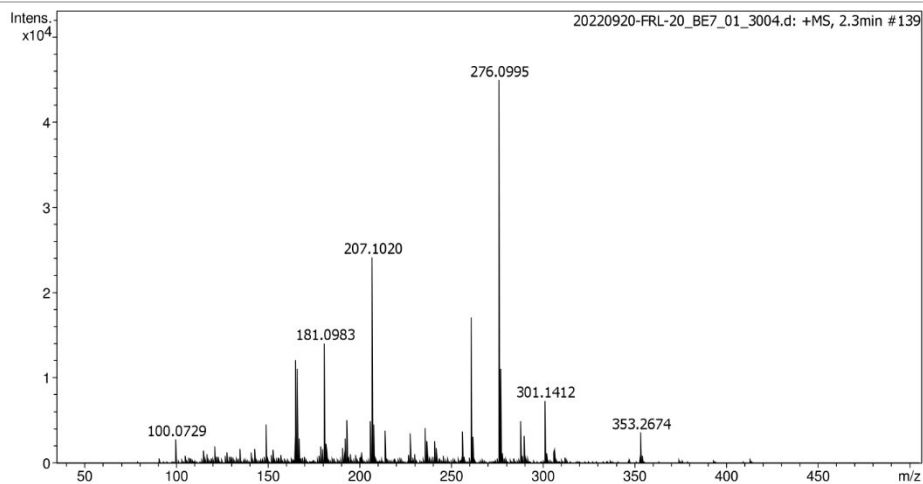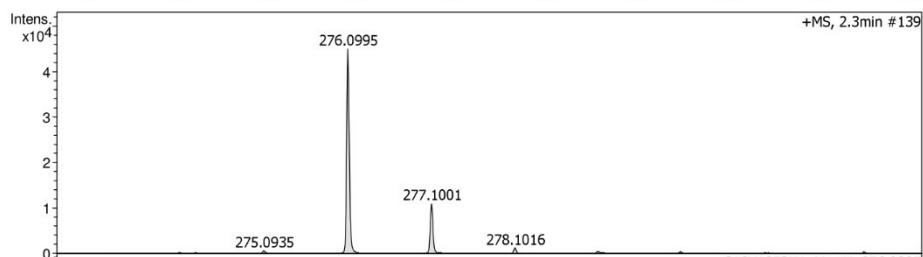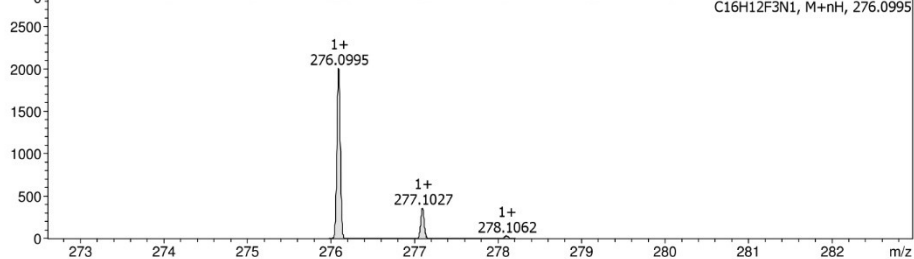

# HRMS (AP) spectra of **3bc**

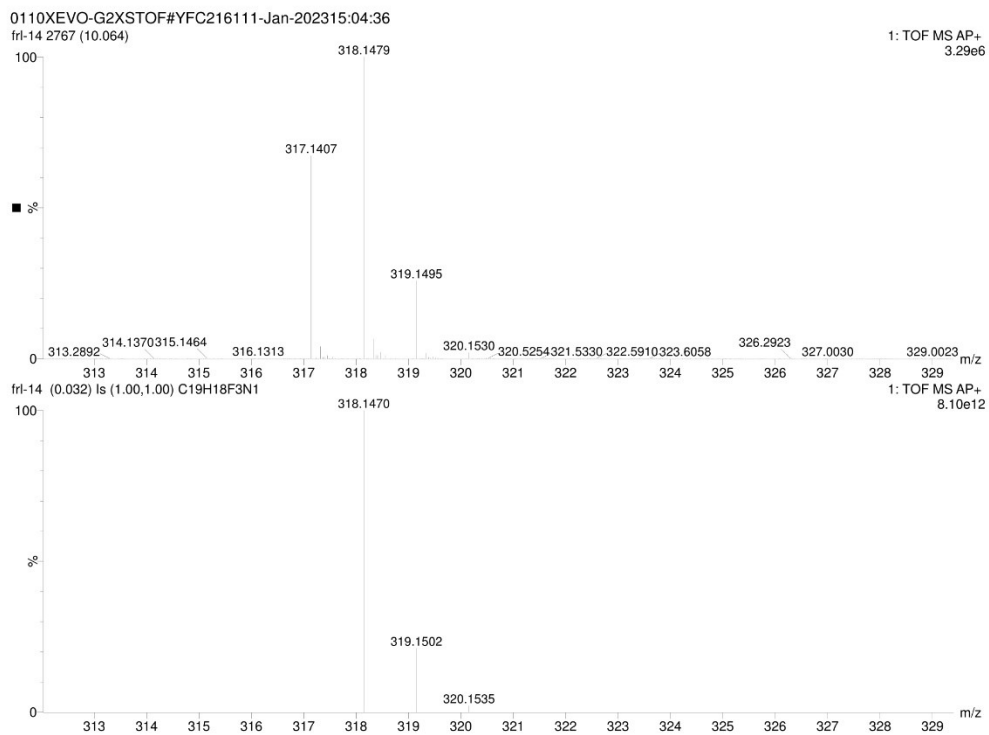

# HRMS (ESI) spectra of **3bd**

## Generic Display Report

**Analysis Info**  
Analysis Name: D:\Data\2022MS\HJQ\0926\20220920-FRL-23\_RA2\_01\_3007.d  
Method: tune\_low\_20-400\_pos-lcmsmin.m  
Sample Name: 20220920-FRL-23  
Comment:  
Acquisition Date: 26/09/2022 8:58:59 PM  
Operator: gftang  
Instrument: micrOTOF

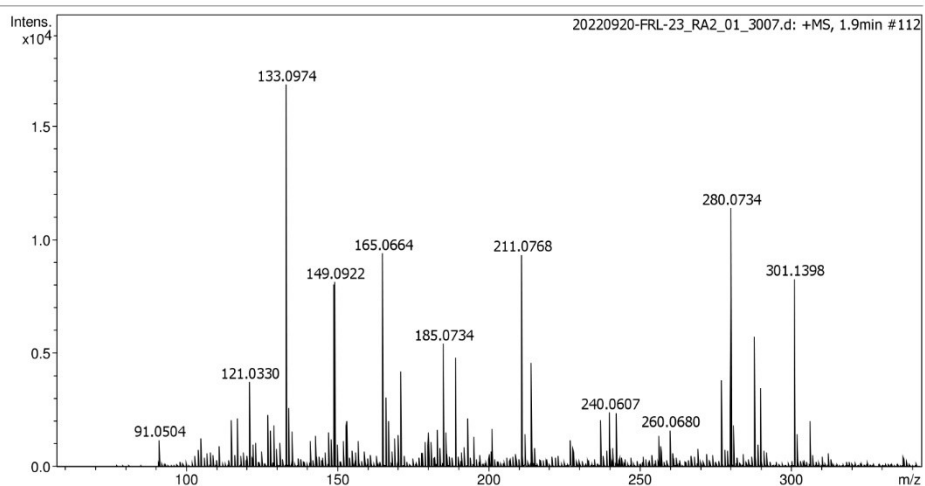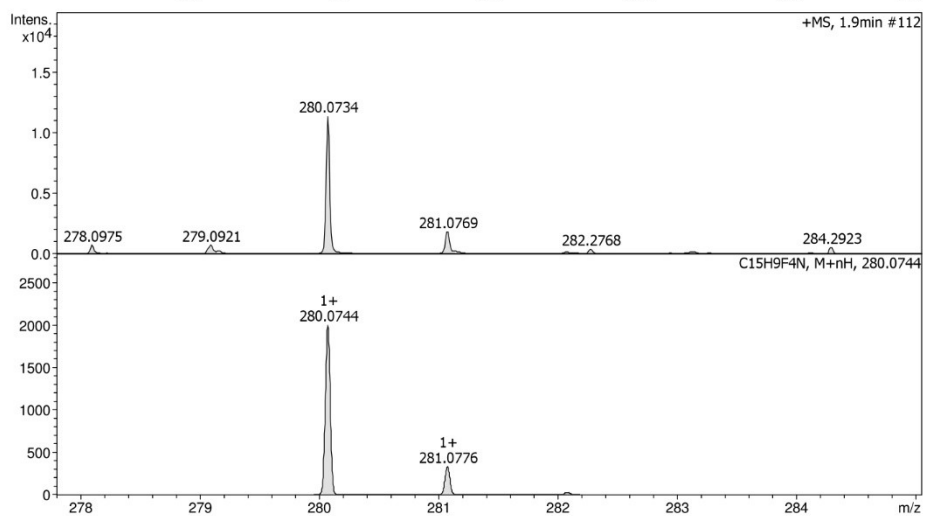

# HRMS (ESI) spectra of **3be**

## Generic Display Report

**Analysis Info**  
Analysis Name: D:\Data\2022MS\HJQ\0926\20220920-FRL-22\_RA1\_01\_3006.d  
Method: tune\_low\_20-400\_pos-icmsmin.m  
Sample Name: 20220920-FRL-22  
Comment:  
Acquisition Date: 26/09/2022 8:48:05 PM  
Operator: gftang  
Instrument: micrOTOF

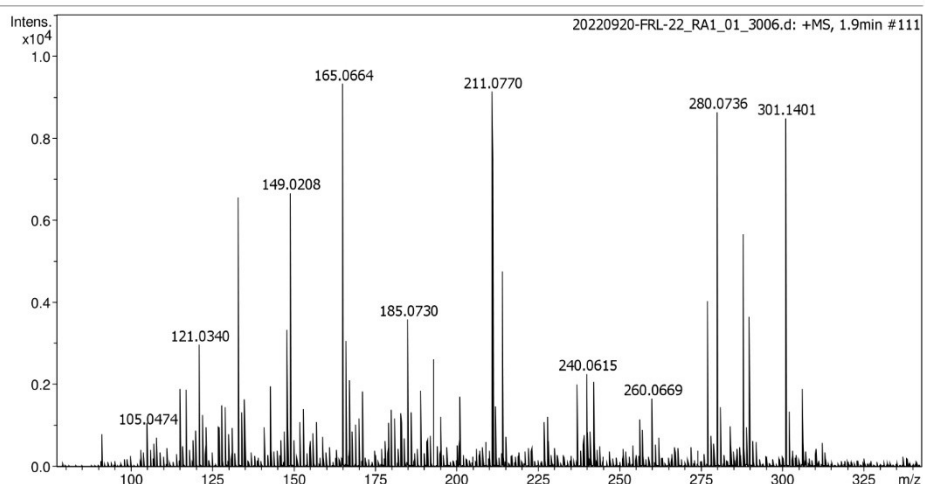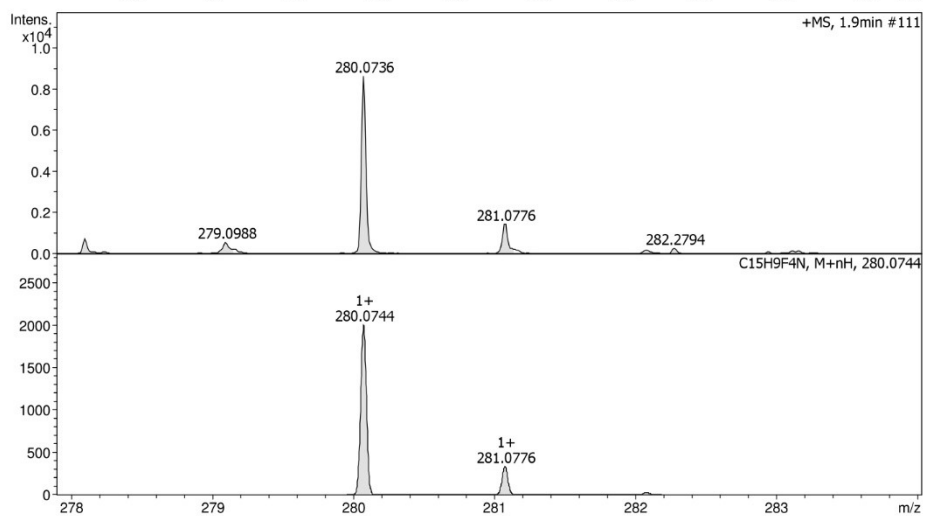



# HRMS (ESI) spectra of **3bf**

## Generic Display Report

**Analysis Info**  
Analysis Name: D:\Data\2022MS\HJQ\0926\20220920-FRL-24\_RA3\_01\_3008.d  
Method: tune\_low\_20-400\_pos-lcmsmin.m  
Sample Name: 20220920-FRL-24  
Comment:  
Acquisition Date: 26/09/2022 9:09:54 PM  
Operator: gftang  
Instrument: micrOTOF

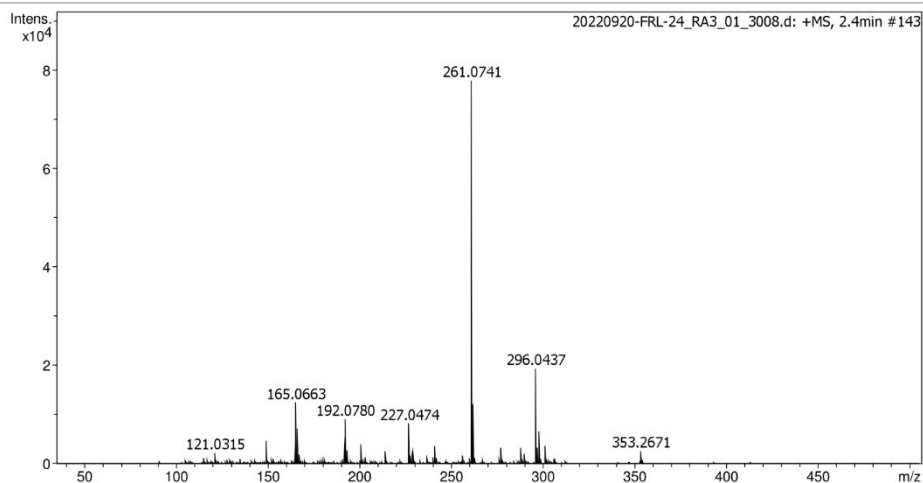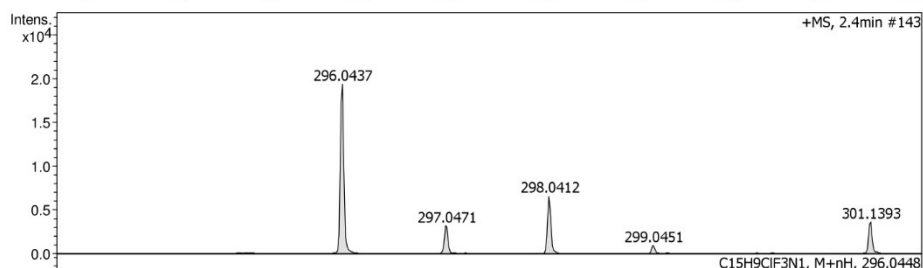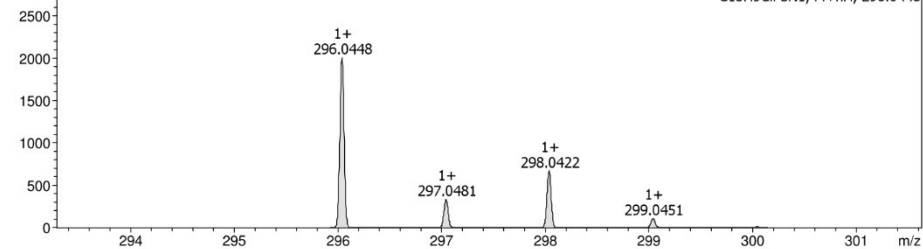

# HRMS (ESI) spectra of **3bg**

## Generic Display Report

|                      |                                                       |                  |                       |
|----------------------|-------------------------------------------------------|------------------|-----------------------|
| <b>Analysis Info</b> |                                                       | Acquisition Date | 26/09/2022 9:20:48 PM |
| Analysis Name        | D:\Data\2022MS\HJQ\0926\20220920-FRL-25_RA4_01_3009.d | Operator         | gftang                |
| Method               | tune_low_20-400_pos-lcmsmin.m                         | Instrument       | micrOTOF              |
| Sample Name          | 20220920-FRL-25                                       |                  |                       |
| Comment              |                                                       |                  |                       |

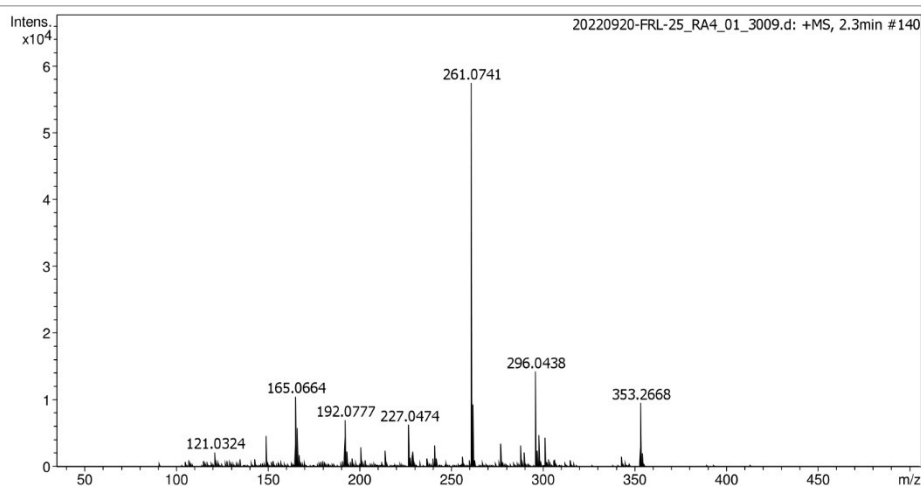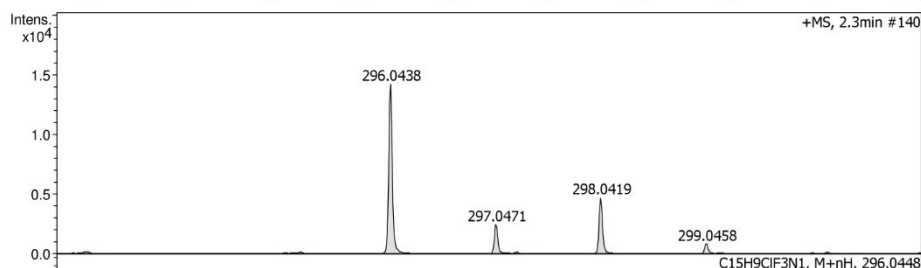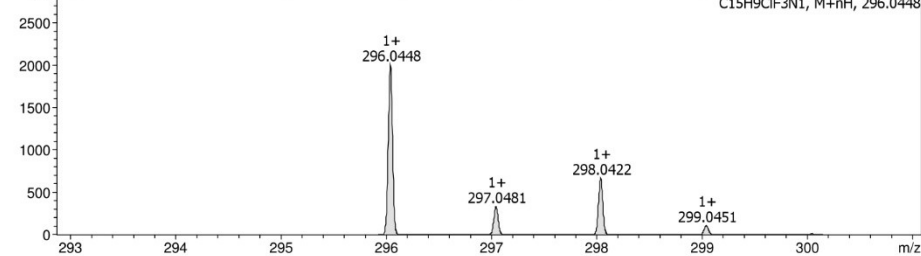

# HRMS (AP) spectra of **3bh**

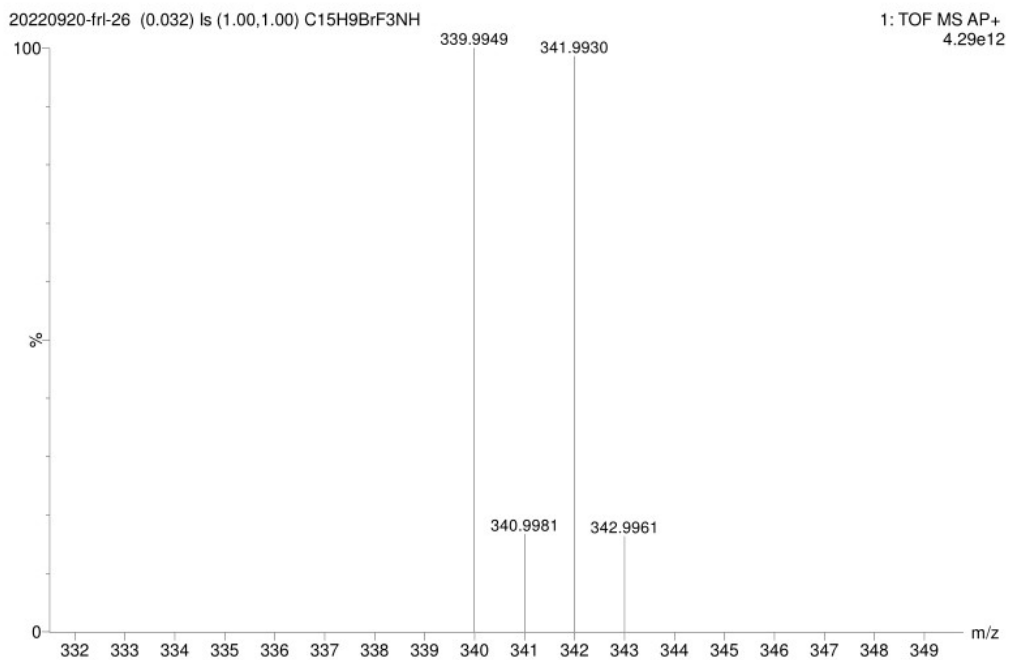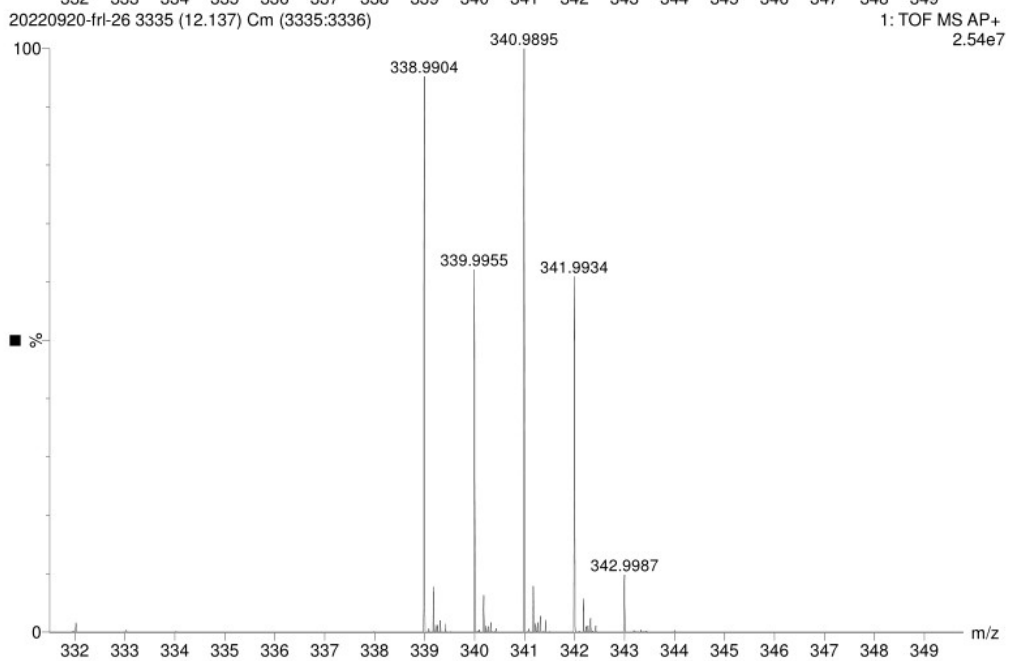

# HRMS (ESI) spectra of **3bi**

## Generic Display Report

|                      |                                                       |                  |                       |
|----------------------|-------------------------------------------------------|------------------|-----------------------|
| <b>Analysis Info</b> |                                                       | Acquisition Date | 26/09/2022 9:42:36 PM |
| Analysis Name        | D:\Data\2022MS\HJQ\0926\20220920-FRL-27_RA6_01_3011.d | Operator         | gftang                |
| Method               | tune_low_20-400_pos-lcmsmin.m                         | Instrument       | micrOTOF              |
| Sample Name          | 20220920-FRL-27                                       |                  |                       |
| Comment              |                                                       |                  |                       |

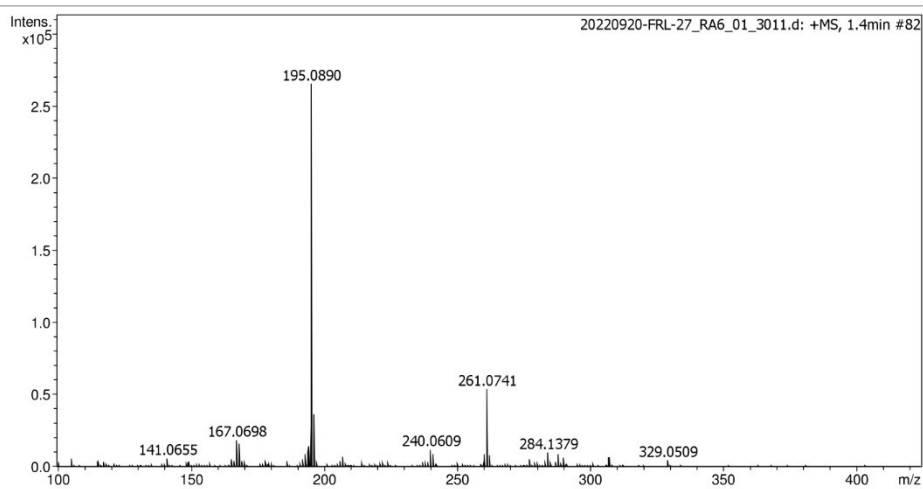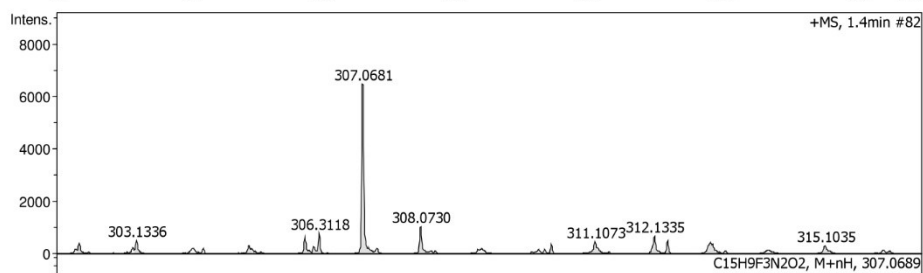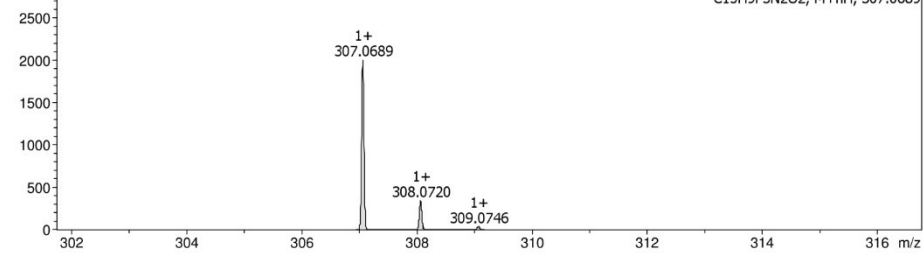

# HRMS (AP) spectra of **3bj**

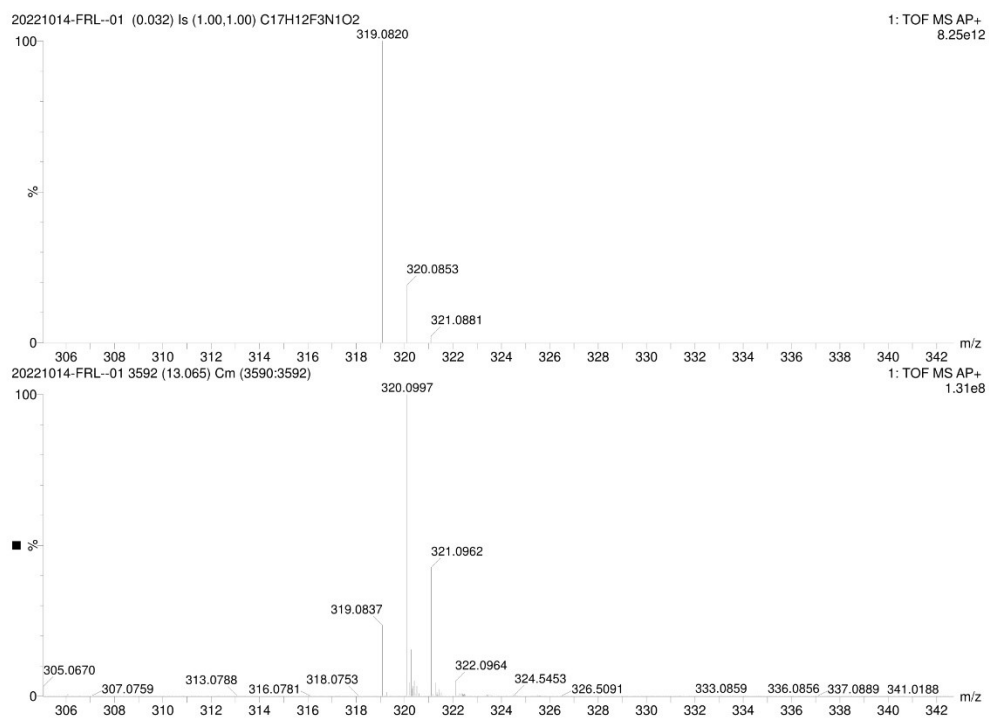

# HRMS (ESI) spectra of **3bk**

## Generic Display Report

**Analysis Info**  
Analysis Name: D:\Data\2022MS\HJQ\0926\20220920-FRL-21\_BE8\_01\_3005.d  
Method: tune\_low\_20-400\_pos-icmsmin.m  
Sample Name: 20220920-FRL-21  
Comment:  
Acquisition Date: 26/09/2022 8:37:10 PM  
Operator: gftang  
Instrument: micrOTOF

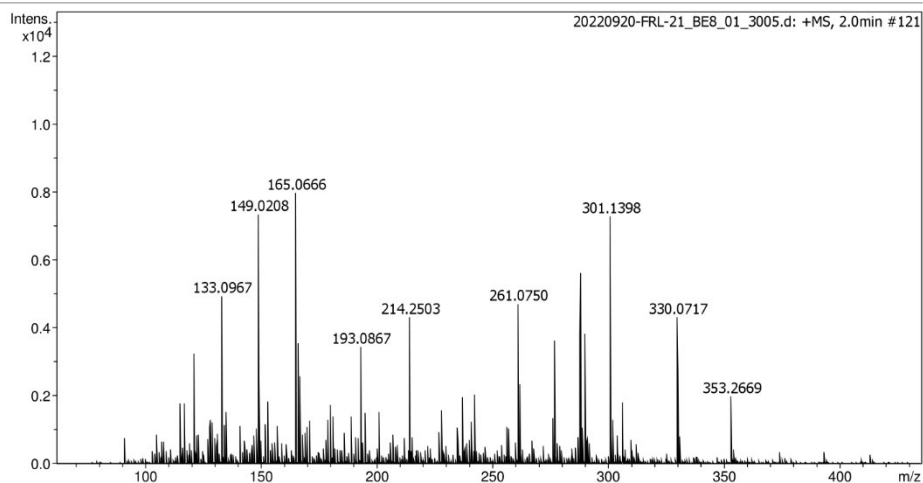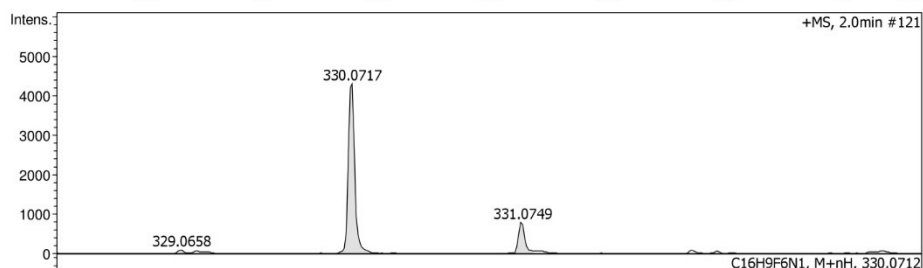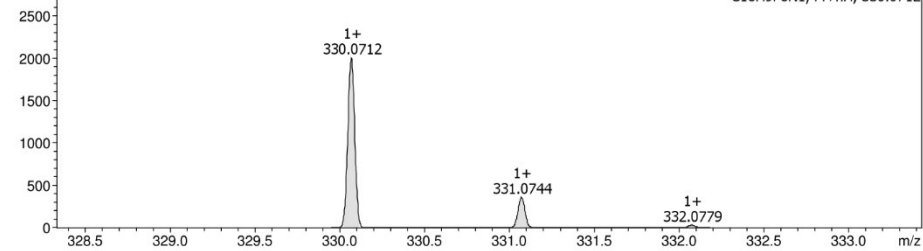

## HRMS (AP) spectra of **3bl**

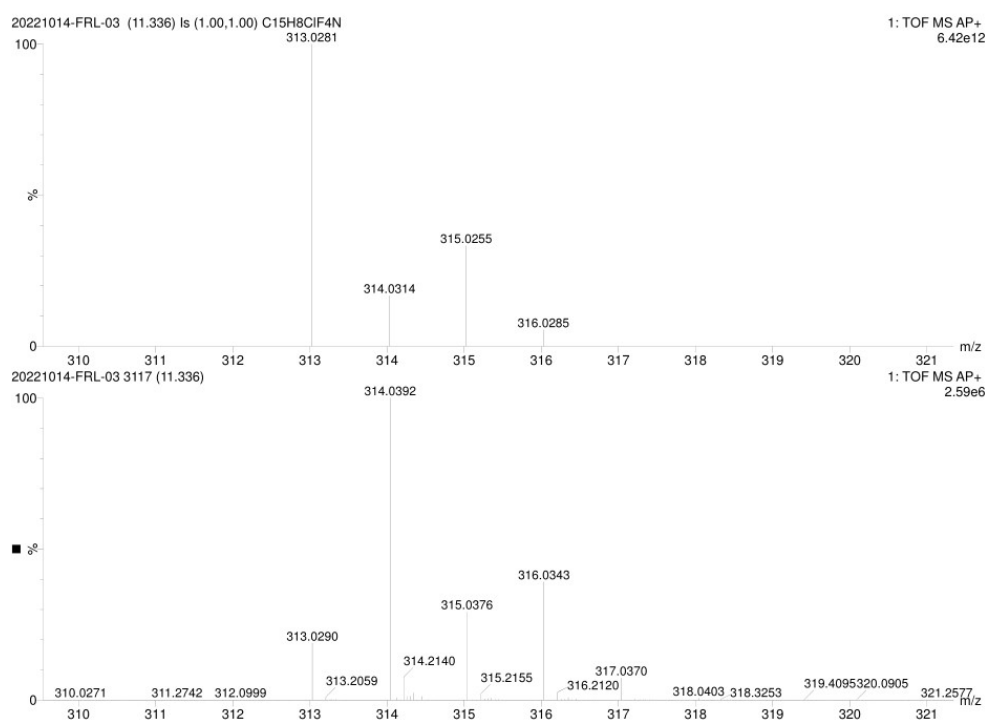

## HRMS (AP) spectra of **3bm**

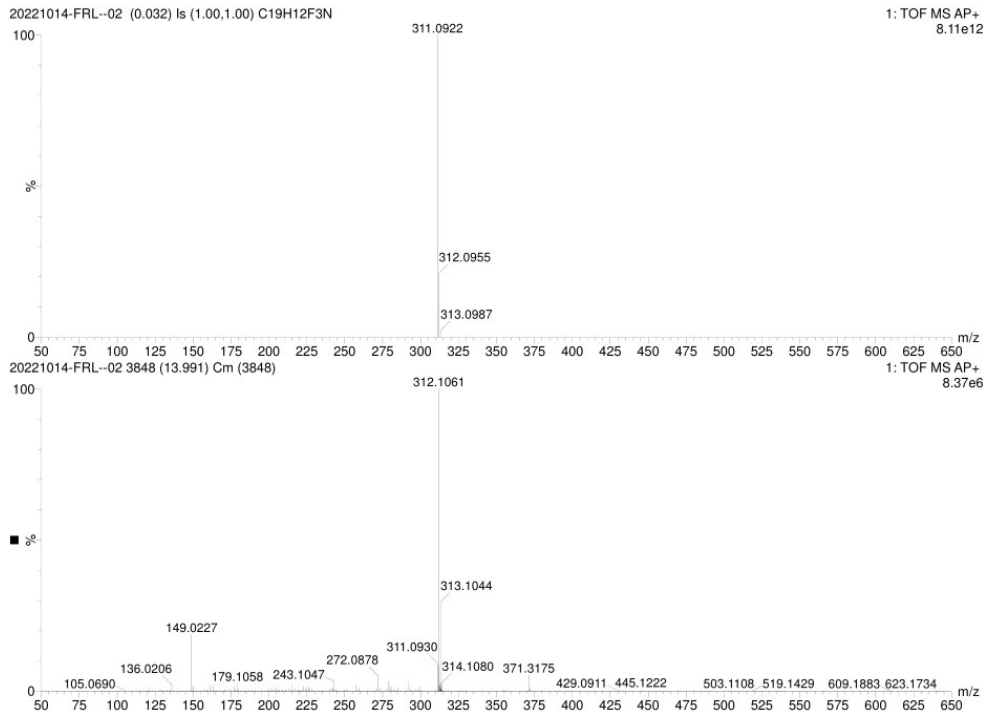



## HRMS (AP) spectra of **3bn**

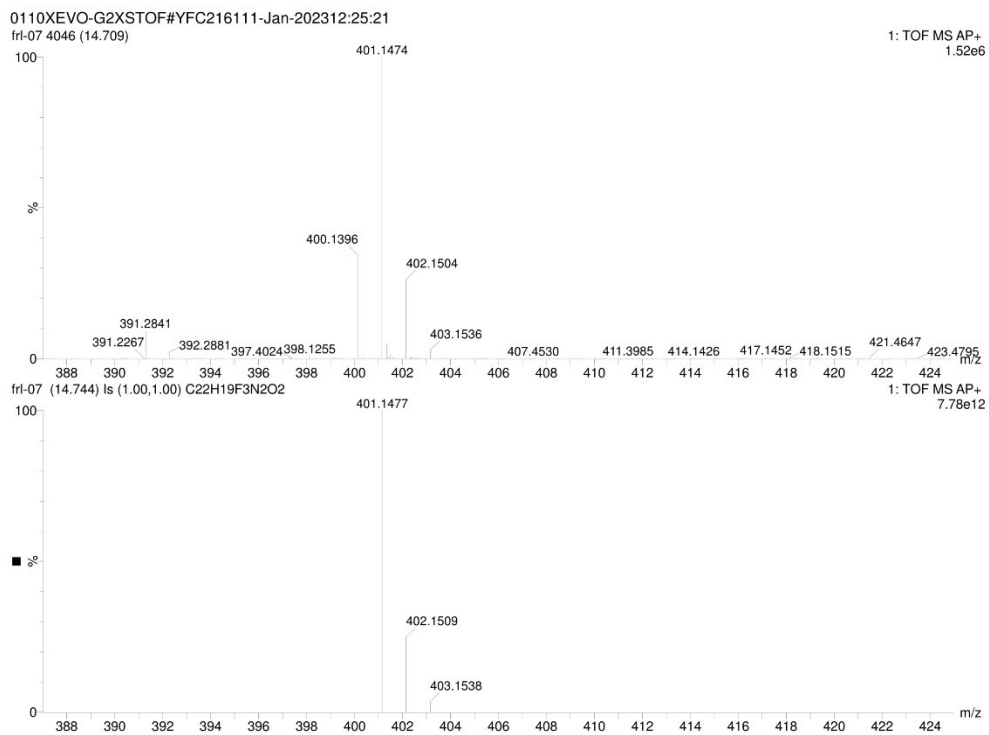

## HRMS (AP) spectra of **3bo**

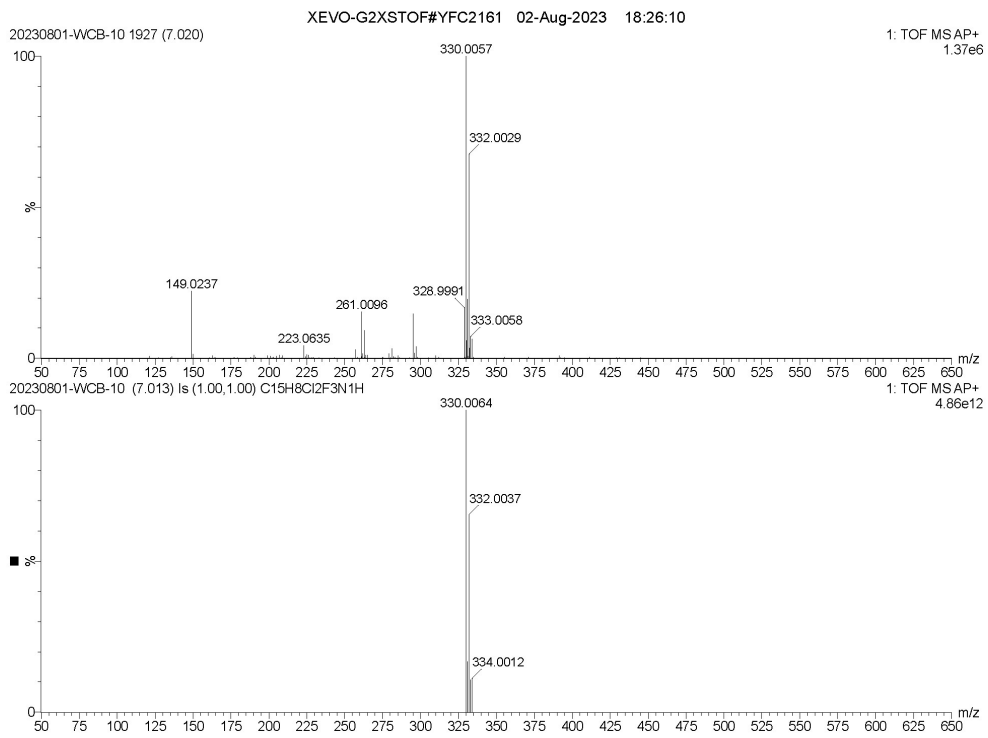

# HRMS (AP) spectra of **3bp**

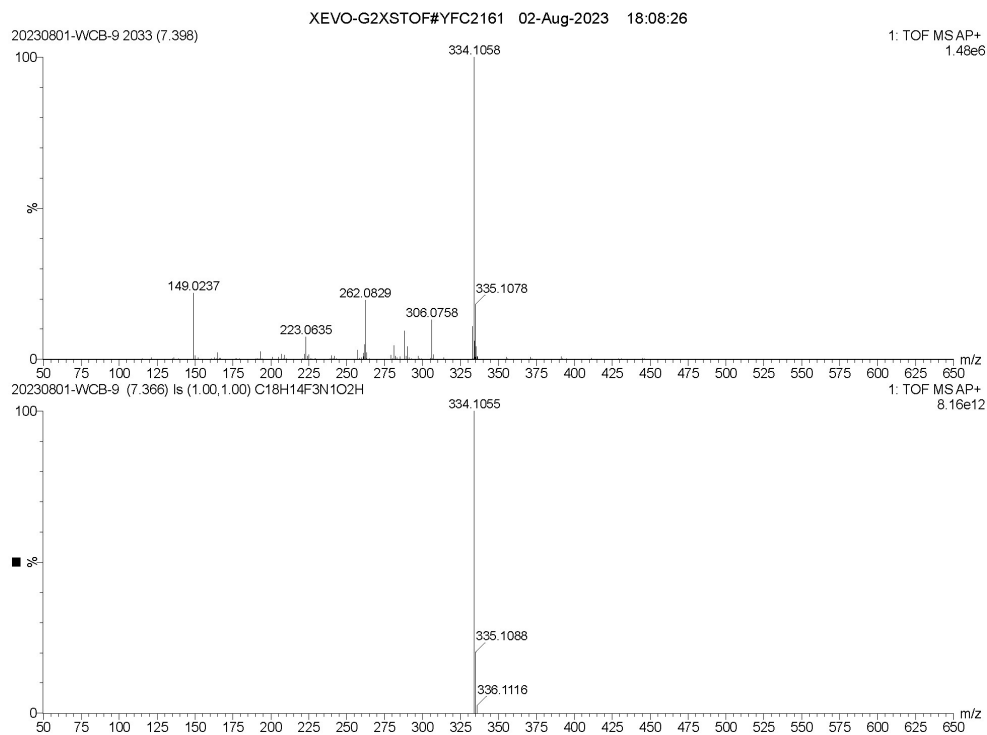

## 11. Crystal data and structure refinement for the products

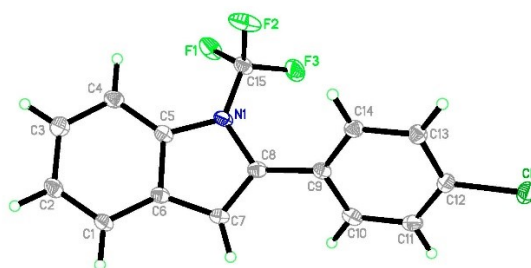

|                                   |                                                    |                  |
|-----------------------------------|----------------------------------------------------|------------------|
| Identification code               | 3am                                                |                  |
| Empirical formula                 | C <sub>15</sub> H <sub>9</sub> Cl F <sub>3</sub> N |                  |
| Formula weight                    | 295.68                                             |                  |
| Temperature                       | 100(2) K                                           |                  |
| Wavelength                        | 1.54178 Å                                          |                  |
| Crystal system                    | Monoclinic                                         |                  |
| Space group                       | Cc                                                 |                  |
| Unit cell dimensions              | a = 5.9221(4) Å                                    | α = 90°.         |
|                                   | b = 21.7851(16) Å                                  | β = 100.563(4)°. |
|                                   | c = 10.0601(8) Å                                   | γ = 90°.         |
| Volume                            | 1275.89(16) Å <sup>3</sup>                         |                  |
| Z                                 | 4                                                  |                  |
| Density (calculated)              | 1.539 Mg/m <sup>3</sup>                            |                  |
| Absorption coefficient            | 2.903 mm <sup>-1</sup>                             |                  |
| F(000)                            | 600                                                |                  |
| Crystal size                      | 0.15 x 0.20 x 0.25 mm <sup>3</sup>                 |                  |
| Theta range for data collection   | 4.058 to 68.245°.                                  |                  |
| Index ranges                      | -7 ≤ h ≤ 5, -26 ≤ k ≤ 25, -12 ≤ l ≤ 11             |                  |
| Reflections collected             | 6340                                               |                  |
| Independent reflections           | 1822 [R(int) = 0.0526]                             |                  |
| Completeness to theta = 67.679°   | 100.0 %                                            |                  |
| Absorption correction             | Multi-Scan                                         |                  |
| Refinement method                 | Full-matrix least-squares on F <sup>2</sup>        |                  |
| Data / restraints / parameters    | 1822 / 2 / 181                                     |                  |
| Goodness-of-fit on F <sup>2</sup> | 1.004                                              |                  |
| Final R indices [I > 2σ(I)]       | R1 = 0.0360, wR2 = 0.0859                          |                  |
| R indices (all data)              | R1 = 0.0407, wR2 = 0.0891                          |                  |
| Absolute structure parameter      | 0.037(19)                                          |                  |
| Extinction coefficient            | n/a                                                |                  |
| Largest diff. peak and hole       | 0.269 and -0.207 e.Å <sup>-3</sup>                 |                  |

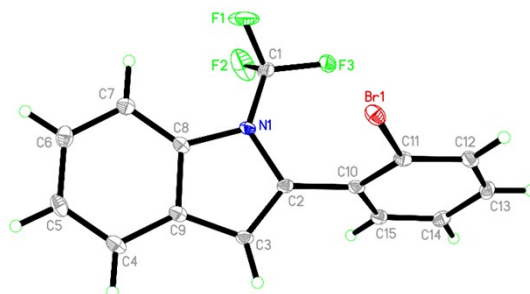

|                                   |                                                    |                            |
|-----------------------------------|----------------------------------------------------|----------------------------|
| Identification code               | 3aq                                                |                            |
| Empirical formula                 | C <sub>15</sub> H <sub>9</sub> Br F <sub>3</sub> N |                            |
| Formula weight                    | 340.14                                             |                            |
| Temperature                       | 100(2) K                                           |                            |
| Wavelength                        | 1.54178 Å                                          |                            |
| Crystal system                    | Triclinic                                          |                            |
| Space group                       | P-1                                                |                            |
| Unit cell dimensions              | a = 8.1764(6) Å                                    | $\alpha = 86.542(2)^\circ$ |
|                                   | b = 10.5249(7) Å                                   | $\beta = 88.533(2)^\circ$  |
|                                   | c = 15.2713(10) Å                                  | $\gamma = 89.967(2)^\circ$ |
| Volume                            | 1311.36(16) Å <sup>3</sup>                         |                            |
| Z                                 | 4                                                  |                            |
| Density (calculated)              | 1.723 Mg/m <sup>3</sup>                            |                            |
| Absorption coefficient            | 4.521 mm <sup>-1</sup>                             |                            |
| F(000)                            | 672                                                |                            |
| Crystal size                      | 0.15 x 0.20 x 0.25 mm <sup>3</sup>                 |                            |
| Theta range for data collection   | 2.900 to 68.317°                                   |                            |
| Index ranges                      | -9 ≤ h ≤ 9, -12 ≤ k ≤ 12, -18 ≤ l ≤ 18             |                            |
| Reflections collected             | 17835                                              |                            |
| Independent reflections           | 4791 [R(int) = 0.0430]                             |                            |
| Completeness to theta = 67.679°   | 99.9 %                                             |                            |
| Absorption correction             | Multi-Scan                                         |                            |
| Refinement method                 | Full-matrix least-squares on F <sup>2</sup>        |                            |
| Data / restraints / parameters    | 4791 / 24 / 361                                    |                            |
| Goodness-of-fit on F <sup>2</sup> | 1.003                                              |                            |
| Final R indices [I > 2σ(I)]       | R1 = 0.0317, wR2 = 0.0831                          |                            |

|                             |                                    |
|-----------------------------|------------------------------------|
| R indices (all data)        | R1 = 0.0333, wR2 = 0.0844          |
| Extinction coefficient      | n/a                                |
| Largest diff. peak and hole | 0.807 and -0.546 e.Å <sup>-3</sup> |

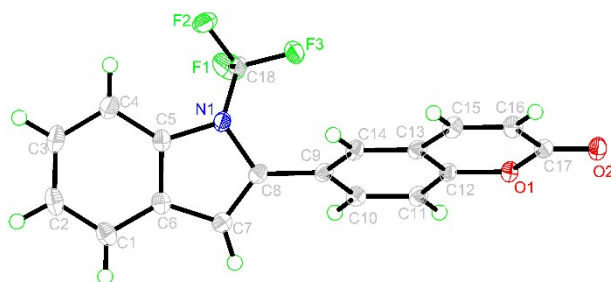

|                                   |                                                                                                                      |
|-----------------------------------|----------------------------------------------------------------------------------------------------------------------|
| Identification code               | 3ag'                                                                                                                 |
| Empirical formula                 | C18 H10 F3 N O2                                                                                                      |
| Formula weight                    | 329.27                                                                                                               |
| Temperature                       | 100(2) K                                                                                                             |
| Wavelength                        | 1.54178 Å                                                                                                            |
| Crystal system                    | Triclinic                                                                                                            |
| Space group                       | P-1                                                                                                                  |
| Unit cell dimensions              | a = 6.6165(5) Å      α = 96.542(3)°<br>b = 10.3211(8) Å      β = 96.293(3)°<br>c = 10.9424(8) Å      γ = 102.766(3)° |
| Volume                            | 716.99(9) Å <sup>3</sup>                                                                                             |
| Z                                 | 2                                                                                                                    |
| Density (calculated)              | 1.525 Mg/m <sup>3</sup>                                                                                              |
| Absorption coefficient            | 1.088 mm <sup>-1</sup>                                                                                               |
| F(000)                            | 336                                                                                                                  |
| Crystal size                      | 0.028 x 0.097 x 0.26 mm <sup>3</sup>                                                                                 |
| Theta range for data collection   | 4.106 to 68.360°                                                                                                     |
| Index ranges                      | -7 ≤ h ≤ 7, -12 ≤ k ≤ 12, -13 ≤ l ≤ 13                                                                               |
| Reflections collected             | 8757                                                                                                                 |
| Independent reflections           | 2627 [R(int) = 0.0553]                                                                                               |
| Completeness to theta = 67.679°   | 99.8 %                                                                                                               |
| Absorption correction             | Multi-Scan                                                                                                           |
| Refinement method                 | Full-matrix least-squares on F <sup>2</sup>                                                                          |
| Data / restraints / parameters    | 2627 / 0 / 217                                                                                                       |
| Goodness-of-fit on F <sup>2</sup> | 1.063                                                                                                                |
| Final R indices [I > 2σ(I)]       | R1 = 0.0482, wR2 = 0.1258                                                                                            |
| R indices (all data)              | R1 = 0.0525, wR2 = 0.1303                                                                                            |
| Extinction coefficient            | n/a                                                                                                                  |

Largest diff. peak and hole

0.456 and -0.323 e.Å<sup>-3</sup>

## 12. Checkcif report for the products

### checkCIF/PLATON report

Structure factors have been supplied for datablock(s) 3am

THIS REPORT IS FOR GUIDANCE ONLY. IF USED AS PART OF A REVIEW PROCEDURE FOR PUBLICATION, IT SHOULD NOT REPLACE THE EXPERTISE OF AN EXPERIENCED CRYSTALLOGRAPHIC REFEREE.

No syntax errors found. CIF dictionary Interpreting this report

### Datablock: 3am

---

Bond precision: C-C = 0.0051 Å Wavelength=1.54178

Cell: a=5.9221(4) b=21.7851(16) c=10.0601(8)  
alpha=90 beta=100.563(4) gamma=90

Temperature: 100 K

|                        | Calculated     | Reported       |
|------------------------|----------------|----------------|
| Volume                 | 1275.90(16)    | 1275.90(16)    |
| Space group            | C c            | C 1 c 1        |
| Hall group             | C -2yc         | C -2yc         |
| Moiety formula         | C15 H9 Cl F3 N | C15 H9 Cl F3 N |
| Sum formula            | C15 H9 Cl F3 N | C15 H9 Cl F3 N |
| Mr                     | 295.68         | 295.68         |
| Dx, g cm <sup>-3</sup> | 1.539          | 1.539          |
| Z                      | 4              | 4              |
| Mu (mm <sup>-1</sup> ) | 2.903          | 2.903          |
| F000                   | 600.0          | 600.0          |
| F000'                  | 603.47         |                |
| h, k, lmax             | 7, 26, 12      | 7, 26, 12      |
| Nref                   | 2333[ 1173]    | 1822           |
| Tmin, Tmax             | 0.523, 0.647   | 0.533, 0.753   |
| Tmin'                  | 0.461          |                |

Correction method= # Reported T Limits: Tmin=0.533 Tmax=0.753  
AbsCorr = MULTI-SCAN

Data completeness= 1.55/0.78 Theta(max)= 68.250

R(reflections)= 0.0358( 1699) wR2(reflections)=  
0.0829( 1822)

S = 1.101 Npar= 181

---

The following ALERTS were generated. Each ALERT has the format  
**test-name\_ALERT\_alert-type\_alert-level.**  
Click on the hyperlinks for more details of the test.

---

**Alert level C**  
PLAT089\_ALERT\_3\_C Poor Data / Parameter Ratio (Zmax < 18) ..... 6.48 Note  
PLAT340\_ALERT\_3\_C Low Bond Precision on C-C Bonds ..... 0.00513 Ang.

---

**Alert level G**  
PLAT242\_ALERT\_2\_G Low 'MainMol' Ueq as Compared to Neighbors of ..... C15 Check  
PLAT883\_ALERT\_1\_G No Info/Value for \_atom\_sites\_solution\_primary . Please Do !  
PLAT915\_ALERT\_3\_G No Flack x Check Done: Low Friedel Pair Coverage 56 %  
PLAT978\_ALERT\_2\_G Number C-C Bonds with Positive Residual Density. 1 Info

---

0 **ALERT level A** - Most likely a serious problem - resolve or explain  
0 **ALERT level B** - A potentially serious problem, consider carefully  
0 **ALERT level C** - Check. Ensure it is not caused by an omission or oversight  
4 **ALERT level G** - General information/check it is not something unexpected

1 ALERT type 1 CIF construction/syntax error, inconsistent or missing data  
2 ALERT type 2 Indicator that the structure model may be wrong or deficient  
3 ALERT type 3 Indicator that the structure quality may be low  
0 ALERT type 4 Improvement, methodology, query or suggestion  
0 ALERT type 5 Informative message, check

---

#### Validation response form

Please find below a validation response form (VRF) that can be filled in and pasted into your CIF.

```
# start Validation Reply Form
_vrf_PLAT089_3am
;
PROBLEM: Poor Data / Parameter Ratio (Zmax < 18) ..... 6.48 Note
RESPONSE: ...
;
_vrf_PLAT340_3am ;
PROBLEM: Low Bond Precision on C-C Bonds ..... 0.00513 Ang.
RESPONSE: ...
;
# end Validation Reply Form
```

---

It is advisable to attempt to resolve as many as possible of the alerts in all categories. Often the minor alerts point to easily fixed oversights, errors and omissions in your CIF or refinement strategy, so attention to these fine details can be worthwhile. In order to resolve some of the more serious problems it may be necessary to carry out additional measurements or structure refinements. However, the purpose of your study may justify the reported deviations and the more serious of these should normally be commented upon in the discussion or experimental section of a paper or in the "special\_details" fields of the CIF. checkCIF was carefully designed to identify outliers and unusual parameters, but every test has its limitations and alerts that are not important in a particular case may appear. Conversely, the absence of alerts does not guarantee there are no aspects of the results needing attention. It is up to the individual to critically assess their own results and, if necessary, seek expert advice.

#### Publication of your CIF in IUCr journals

A basic structural check has been run on your CIF. These basic checks will be run on all CIFs submitted for publication in IUCr journals (*Acta Crystallographica*, *Journal of Applied Crystallography*, *Journal of Synchrotron Radiation*); however, if you intend to submit to *Acta Crystallographica Section C* or *E* or *IUCrData*, you should make sure that full publication checks are run on the final version of your CIF prior to submission.

#### Publication of your CIF in other journals

Please refer to the *Notes for Authors* of the relevant journal for any special instructions relating to CIF submission.

---

PLATON version of 28/11/2022; check.def file version of 28/11/2022



Datblock: 3aa-cligaid.plt

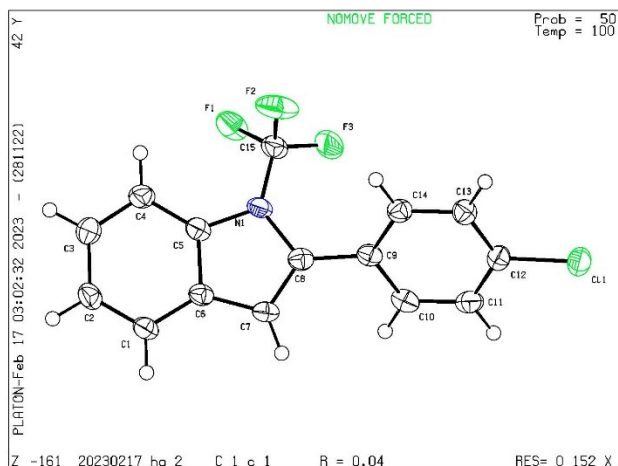

### checkCIF/PLATON report

Structure factors have been supplied for datablock(s) 3aa

THIS REPORT IS FOR GUIDANCE ONLY. IF USED AS PART OF A REVIEW PROCEDURE FOR PUBLICATION, IT SHOULD NOT REPLACE THE EXPERTISE OF AN EXPERIENCED CRYSTALLOGRAPHIC REFEREE.

No syntax errors found. CIF dictionary Interpreting this report

### Datablock: 3aa

|                                         |                       |                    |                  |
|-----------------------------------------|-----------------------|--------------------|------------------|
| Bond precision:                         | C-C = 0.0035 Å        | Wavelength=1.54178 |                  |
| Cell:                                   | a=8.1764 (6)          | b=10.5249 (7)      | c=15.2713 (10)   |
|                                         | alpha=86.542 (2)      | beta=88.533 (2)    | gamma=89.967 (2) |
| Temperature:                            | 100 K                 |                    |                  |
| Volume                                  | Calculated            | Reported           |                  |
|                                         | 1311.36 (16)          | 1311.36 (16)       |                  |
| Space group                             | P -1                  | P -1               |                  |
| Hall group                              | -P 1                  | -P 1               |                  |
| Moiety formula                          | C15 H9 Br F3 N        | C15 H9 Br F3 N     |                  |
| Sum formula                             | C15 H9 Br F3 N        | C15 H9 Br F3 N     |                  |
| Mr                                      | 340.13                | 340.14             |                  |
| Dx, g cm <sup>-3</sup>                  | 1.723                 | 1.723              |                  |
| Z                                       | 4                     | 4                  |                  |
| Mu (mm <sup>-1</sup> )                  | 4.521                 | 4.521              |                  |
| F000                                    | 672.0                 | 672.0              |                  |
| F000'                                   | 671.30                |                    |                  |
| h, k, lmax                              | 9, 12, 18             | 9, 12, 18          |                  |
| Nref                                    | 4804                  | 4791               |                  |
| Tmin, Tmax                              | 0.389, 0.508          | 0.533, 0.753       |                  |
| Tmin'                                   | 0.281                 |                    |                  |
| Correction method= # Reported T Limits: | Tmin=0.533 Tmax=0.753 |                    |                  |
| AbsCorr = MULTI-SCAN                    |                       |                    |                  |
| Data completeness= 0.997                | Theta(max)= 68.320    |                    |                  |
| R(reflections)= 0.0317 ( 4551)          | wR2(reflections)=     |                    |                  |
| S = 1.056                               | Npar= 361             | 0.0810 ( 4791)     |                  |

---

The following ALERTS were generated. Each ALERT has the format  
**test-name\_ALERT\_alert-type\_alert-level.**  
Click on the hyperlinks for more details of the test.

---

**Alert level C**

|                   |                  |                                           |     |        |
|-------------------|------------------|-------------------------------------------|-----|--------|
| PLAT213_ALERT_2_C | Atom F1          | has ADP max/min Ratio .....               | 3.5 | prolat |
| PLAT213_ALERT_2_C | Atom F4          | has ADP max/min Ratio .....               | 3.6 | prolat |
| PLAT242_ALERT_2_C | Low              | 'MainMol' Ueq as Compared to Neighbors of | C30 | Check  |
| PLAT242_ALERT_2_C | Low              | 'MainMol' Ueq as Compared to Neighbors of | C29 | Check  |
| PLAT911_ALERT_3_C | Missing FCF Refl | Between Thmin & STh/L= 0.600              | 6   | Report |

---

**Alert level G**

|                   |                         |                                       |        |             |
|-------------------|-------------------------|---------------------------------------|--------|-------------|
| PLAT003_ALERT_2_G | Number of Uiso or Uij   | Restrained non-H Atoms ...            | 4      | Report      |
| PLAT154_ALERT_1_G | The s.u.'s on the Cell  | Angles are Equal ..(Note)             | 0.002  | Degree      |
| PLAT177_ALERT_4_G | The CIF-Embedded .res   | File Contains DELU Records            | 1      | Report      |
| PLAT178_ALERT_4_G | The CIF-Embedded .res   | File Contains SIMU Records            | 1      | Report      |
| PLAT188_ALERT_3_G | A Non-default SIMU      | Restraint Value has been used         | 0.0200 | Report      |
| PLAT192_ALERT_3_G | A Non-default DELU      | Restraint Value for First Par         | 0.0200 | Report      |
| PLAT860_ALERT_3_G | Number of Least-Squares | Restraints .....                      | 24     | Note        |
| PLAT883_ALERT_1_G | No Info/Value for       | _atom_sites_solution_primary          |        | Please Do ! |
| PLAT912_ALERT_4_G | Missing # of FCF        | Reflections Above STh/L= 0.600        | 7      | Note        |
| PLAT941_ALERT_3_G | Average HKL             | Measurement Multiplicity .....        | 3.7    | Low         |
| PLAT978_ALERT_2_G | Number C-C              | Bonds with Positive Residual Density. | 5      | Info        |

---

0 **ALERT level A** = Most likely a serious problem - resolve or explain  
0 **ALERT level B** = A potentially serious problem, consider carefully  
5 **ALERT level C** = Check. Ensure it is not caused by an omission or oversight  
11 **ALERT level G** = General information/check it is not something unexpected

2 ALERT type 1 CIF construction/syntax error, inconsistent or missing data  
6 ALERT type 2 Indicator that the structure model may be wrong or deficient  
5 ALERT type 3 Indicator that the structure quality may be low  
3 ALERT type 4 Improvement, methodology, query or suggestion  
0 ALERT type 5 Informative message, check

---

#### Validation response form

Please find below a validation response form (VRF) that can be filled in and pasted into your CIF.

```
# start Validation Reply Form
_vrf_PLAT213_3aq
#
PROBLEM: Atom F1          has ADP max/min Ratio .....      3.5 prolat
RESPONSE: ...
#
_vrf_PLAT242_3aq
#
PROBLEM: Low   'MainMol' Ueq as Compared to Neighbors of      C30 Check
RESPONSE: ...
#
_vrf_PLAT911_3aq
#
PROBLEM: Missing FCF Refl Between Thmin & STh/L= 0.600      6 Report
RESPONSE: ...
#
# end Validation Reply Form
```

---

It is advisable to attempt to resolve as many as possible of the alerts in all categories. Often the minor alerts point to easily fixed oversights, errors and omissions in your CIF or refinement strategy, so attention to these fine details can be worthwhile. In order to resolve some of the more serious problems it may be necessary to carry out additional measurements or structure refinements. However, the purpose of your study may justify the reported deviations and the more serious of these should normally be commented upon in the discussion or experimental section of a paper or in the "special\_details" fields of the CIF. checkCIF was carefully designed to identify outliers and unusual parameters, but every test has its limitations and alerts that are not important in a particular case may appear. Conversely, the absence of alerts does not guarantee there are no aspects of the results needing attention. It is up to the individual to critically assess their own results and, if necessary, seek expert advice.

#### Publication of your CIF in IUCr journals

A basic structural check has been run on your CIF. These basic checks will be run on all CIFs submitted for publication in IUCr journals (*Acta Crystallographica*, *Journal of Applied Crystallography*, *Journal of Synchrotron Radiation*); however, if you intend to submit to *Acta Crystallographica Section C* or *E* or *IUCrData*, you should make sure that full publication checks are run on the final version of your CIF prior to submission.

#### Publication of your CIF in other journals

Please refer to the *Notes for Authors* of the relevant journal for any special instructions relating to CIF submission.

---

PLATON version of 28/11/2022; check.def file version of 28/11/2022

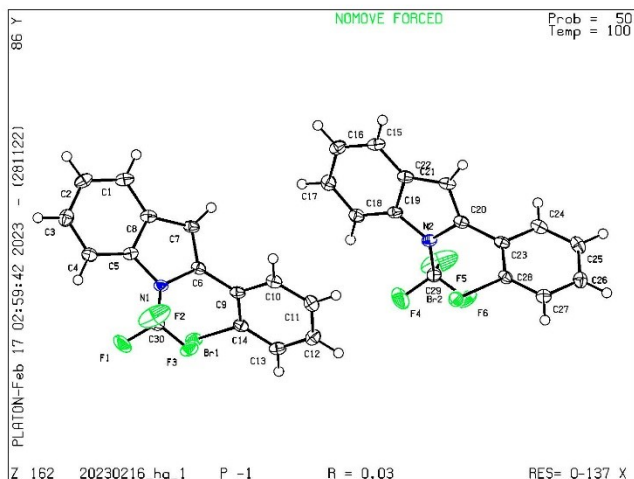

### checkCIF/PLATON report

Structure factors have been supplied for datablock(s) 3ag'

THIS REPORT IS FOR GUIDANCE ONLY. IF USED AS PART OF A REVIEW PROCEDURE FOR PUBLICATION, IT SHOULD NOT REPLACE THE EXPERTISE OF AN EXPERIENCED CRYSTALLOGRAPHIC REFEREE.

No syntax errors found. CIF dictionary Interpreting this report

### Datablock: 3ag'

|                        |                                            |                    |                   |
|------------------------|--------------------------------------------|--------------------|-------------------|
| Bond precision:        | C-C = 0.0022 Å                             | Wavelength=1.54178 |                   |
| Cell:                  | a=6.6165 (5)                               | b=10.3211 (8)      | c=10.9424 (8)     |
|                        | alpha=96.542 (3)                           | beta=96.293 (3)    | gamma=102.766 (3) |
| Temperature:           | 100 K                                      |                    |                   |
|                        | Calculated                                 | Reported           |                   |
| Volume                 | 717.00 (9)                                 | 716.99 (9)         |                   |
| Space group            | P -1                                       | P -1               |                   |
| Hall group             | -P 1                                       | -P 1               |                   |
| Moiety formula         | C18 H10 F3 N O2                            | C18 H10 F3 N O2    |                   |
| Sum formula            | C18 H10 F3 N O2                            | C18 H10 F3 N O2    |                   |
| Mr                     | 329.27                                     | 329.27             |                   |
| Dx, g cm <sup>-3</sup> | 1.525                                      | 1.525              |                   |
| Z                      | 2                                          | 2                  |                   |
| Mu (mm <sup>-1</sup> ) | 1.088                                      | 1.088              |                   |
| F000                   | 336.0                                      | 336.0              |                   |
| F000'                  | 337.30                                     |                    |                   |
| h, k, lmax             | 7, 12, 13                                  | 7, 12, 13          |                   |
| Nref                   | 2633                                       | 2627               |                   |
| Tmin, Tmax             | 0.881, 0.970                               | 0.667, 0.753       |                   |
| Tmin'                  | 0.754                                      |                    |                   |
| Correction method=     | # Reported T Limits: Tmin=0.667 Tmax=0.753 |                    |                   |
| AbsCorr =              | MULTI-SCAN                                 |                    |                   |
| Data completeness=     | 0.998                                      | Theta (max)=       | 68.360            |
| R (reflections)=       | 0.0483 ( 2361)                             | wR2 (reflections)= | 0.1303 ( 2627)    |
| S =                    | 1.063                                      | Npar=              | 217               |

---

The following ALERTS were generated. Each ALERT has the format  
**test-name\_ALERT\_alert-type\_alert-level.**  
Click on the hyperlinks for more details of the test.

---

**Alert level C**

PLAT911\_ALERT\_3\_C Missing FCF Refl Between Thmin & STh/L= 0.600 5 Report

---

**Alert level G**

PLAT154\_ALERT\_1\_G The s.u.'s on the Cell Angles are Equal ..(Note) 0.003 Degree  
PLAT883\_ALERT\_1\_G No Info/Value for \_atom\_sites\_solution\_primary . Please Do !  
PLAT912\_ALERT\_4\_G Missing # of FCF Reflections Above STh/L= 0.600 2 Note  
PLAT941\_ALERT\_3\_G Average HKL Measurement Multiplicity ..... 3.3 Low  
PLAT978\_ALERT\_2\_G Number C-C Bonds with Positive Residual Density. 3 Info  
PLAT992\_ALERT\_5\_G Repd & Actual \_reflns\_number\_gt Values Differ by 2 Check

---

0 **ALERT level A** = Most likely a serious problem - resolve or explain  
0 **ALERT level B** = A potentially serious problem, consider carefully  
1 **ALERT level C** = Check. Ensure it is not caused by an omission or oversight  
6 **ALERT level G** = General information/check it is not something unexpected

2 ALERT type 1 CIF construction/syntax error, inconsistent or missing data  
1 ALERT type 2 Indicator that the structure model may be wrong or deficient  
2 ALERT type 3 Indicator that the structure quality may be low  
1 ALERT type 4 Improvement, methodology, query or suggestion  
1 ALERT type 5 Informative message, check

---

### Validation response form

Please find below a validation response form (VRF) that can be filled in and pasted into your CIF.

```
# start Validation Reply Form
_vrf_PLAT911_3ag'
;
PROBLEM: Missing FCF Refl Between Thmin & STh/L= 0.600 5 Report
RESPONSE: ...
;
# end Validation Reply Form
```

---

It is advisable to attempt to resolve as many as possible of the alerts in all categories. Often the minor alerts point to easily fixed oversights, errors and omissions in your CIF or refinement strategy, so attention to these fine details can be worthwhile. In order to resolve some of the more serious problems it may be necessary to carry out additional measurements or structure refinements. However, the purpose of your study may justify the reported deviations and the more serious of these should normally be commented upon in the discussion or experimental section of a paper or in the "special\_details" fields of the CIF. checkCIF was carefully designed to identify outliers and unusual parameters, but every test has its limitations and alerts that are not important in a particular case may appear. Conversely, the absence of alerts does not guarantee there are no aspects of the results needing attention. It is up to the individual to critically assess their own results and, if necessary, seek expert advice.

### Publication of your CIF in IUCr journals

A basic structural check has been run on your CIF. These basic checks will be run on all CIFs submitted for publication in IUCr journals (*Acta Crystallographica*, *Journal of Applied Crystallography*, *Journal of Synchrotron Radiation*); however, if you intend to submit to *Acta Crystallographica Section C* or *E* or *IUCrData*, you should make sure that full publication checks are run on the final version of your CIF prior to submission.

### Publication of your CIF in other journals

Please refer to the *Notes for Authors* of the relevant journal for any special instructions relating to CIF submission.

---

PLATON version of 06/07/2023; check.def file version of 30/06/2023

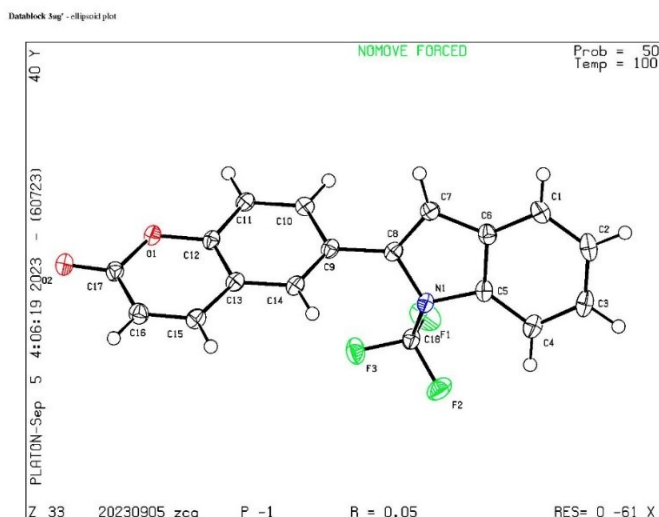

### 13. References

1. H. Y. Aboul-Enein and M. R. Islam, Improved synthesis of o-iodoaminogluthethimide: a precursor for a potential adrenal scanning agent, *Pharmazie*, 1988, **43**, 725.
2. Y. Y. Liao, J. C. Deng, Y. P. Ke, X. L. Zhong, L. Xu, R. Y. Tang and W. X. Zheng, Isothiocyanation of amines using the Langlois reagent, *Chem. Commun.*, 2017, **53**, 6073-6076.
3. J. Q. Chen, X. X. Luo, M. L. Chen, Y. Chen and J. Wu, Visible-light-induced 1,7-enyne dicyclization: synthesis of ester- substituted Benzo[*j*]phenanthridines, *Org. Lett.*, 2023, **25**, 1978-1983.
4. D. Lu, S. H. Chen, N. Tang, S. F. Yin, N. Kambe and R. H. Qiu, Copper-catalyzed cyclization of 2-alkynylanilines to give 2-haloalkoxy-3-alkyl(aryl)quinolines, *Org. Lett.*, 2023, **25**, 676-681.
5. P. P. Kaishap, G. Duarah, B. Sarma, D. Chetia and S. Gogoi, Ruthenium(II)-catalyzed synthesis of spirobenzofuranones by a decarbonylative annulation reaction, *Angew. Chem., Int. Ed.*, 2018, **57**, 456-460.
6. Y. Wang, Y. Zhou, X. X. Ma and Q. L. Song, Solvent-dependent cyclization of 2-alkynylanilines and ClCF<sub>2</sub>COONa for the divergent assembly of *N*-(Quinolin-2-yl)amides and Quinolin-2(1*H*)-ones, *Org. Lett.*, 2021, **23**, 5599-5604.
7. D. F. L. Rayo, A. Mansour, W. B. Wu, B. N. Bhawal and F. Gagosz, Steric, Electronic and conformational synergistic effects in the gold(I)-catalyzed  $\alpha$ -C-H bond functionalization of tertiary amines, *Angew. Chem., Int. Ed.*, 2023, **62**, e202212893.
8. O. Bakhanovich, B. Klepetářová and P. Beier, Rhodium(II)-catalyzed transannulation approach to *N*-fluoroalkylated indoles, *Org. Biomol. Chem.*, 2023, **21**, 7924-7927.
